# Supplementary material
Source: Research Square preprint supplement (doi:10.21203/rs.3.rs-8821050/v1)
Supplement: Supplementary file 2 [file 56fc22e051156664176f73c7.xlsx]

## Sheet: Table S1
	Table S1. List of primers used in this study
	Name	Sequence	Length	Purpose	Target genes or fragments	Reference	doi
	Slglk2_crRNA_oligo_1	AGATTGAAGAACCTGCTATTCATGGAA	27	Genome editig	Solyc10g008160	Made in this study	-
	Slglk2_crRNA_oligo_2	GGCCTTCCATGAATAGCAGGTTCTTCA	27	Genome editig	Solyc10g008160	Made in this study	-
	SlGLK2_check_F	TCCCATGGGAATTTAATCGACACCA	25	Check mutation at target site	Solyc10g008160	Made in this study	-
	SlGLK2_check_R	TTACGACTAGAACCGTCAACGA	22	Check mutation at target site	Solyc10g008160	Made in this study	-
	SlGLK2_clon_F1	GCAGGCTCCGCGGCCGCCACCATGCTTGCTCTATCTTCATCATTGAGC	48	Cloning to pENTR	Solyc10g008160	Made in this study	-
	SlGLK2_clon_R1	AGCTGGGTCGGCGCGCCCAGTTGGGGGTATTTTGGTAATCCCTTGA	46	Cloning to pENTR	Solyc10g008160	Made in this study	-
	SlGLK2_clon_F2	AAAGAAGCTAAAAAATCATCTAGCAAAATCAAAAATCCTCAAGGAAAGAAAAAAGT	56	site-directed mutagesis PCR	Solyc10g008160	Made in this study	-
	SlGLK2_clon_R2	GCTAGATGATTTTTTAGCTTCTTTTGACTTAGATTTCATATTTCCATGAATAGCA	55	site-directed mutagesis PCR	Solyc10g008160	Made in this study	-
	SlGLK2_clon_F3	CCGCGGTGGCGGCCGCTCTAGAATGCTTGCTCTATCTTCATCATTGAGC	49	Cloning to pGreenII-62-SK	Solyc10g008160	Made in this study	-
	SlGLK2_clon_R3	ATTTCAGCGTACCGAATTGGTACCTCAAGTTGGGGGTATTTTGGTAATCC	50	Cloning to pGreenII-62-SK	Solyc10g008160	Made in this study	-
	P19_clo_F	ATTCGAGCTCGGTACCCGGGGATCCTGGCAGGATATATTGTGGTGTAA	48	Construction of vectors	Synthetic DNA	Made in this study	-
	P19_clo_R	AGGTGACACTATAGAATACTCAAGCTTGTTTACCCGCCAATATATCCTGT	50	Construction of vectors	Synthetic DNA	Made in this study	-
	sfGFP_clo_F	CCGCGGTGGCGGCCGCTCTAGAATGGTGAGCAAGGGCGAGGAG	43	Cloning to pGreenII-62-SK	Synthetic DNA	Made in this study	-
	sfGFP_clo_R	ATTTCAGCGTACCGAATTGGTACCTCATTTATACAGCTCGTCCATGCCGAGA	52	Cloning to pGreenII-62-SK	Synthetic DNA	Made in this study	-
	SlCAC_qPCR_F1	CCTCCGTTGTGATGTAACTGG	22	RT-qPCR	Solyc08g006960	Expósito-Rodríguez et al. BMC Plant Biol., 2008	https://doi.org/10.1186/1471-2229-8-131
	SlCAC_qPCR_R1	ATTGGTGGAAAGTAACATCATCG	24	RT-qPCR	Solyc08g006960	Expósito-Rodríguez et al. BMC Plant Biol ., 2008	https://doi.org/10.1186/1471-2229-8-131
	SlGLK2_qPCR_F1	CCTTACATGTTTGGGGGCATCCAC	24	RT-qPCR	Solyc10g008160	Powell et al., Science, 2012	https://doi.org/10.1126/science.1222218
	SlGLK2_qPCR_R1	GGGGTGCAAATCAGAGGC	18	RT-qPCR	Solyc10g008160	Powell et al., Science, 2012	https://doi.org/10.1126/science.1222218
	SlGLK1_qPCR_F1	CCGTAAGCAGTGGTGATGAGTCTG	24	RT-qPCR	Solyc07g053630	Powell et al., Science, 2012	https://doi.org/10.1126/science.1222218
	SlGLK1_qPCR_R1	AACCCGAACCTACATCCGAAGC	22	RT-qPCR	Solyc07g053630	Powell et al., Science, 2012	https://doi.org/10.1126/science.1222218
	SlCO-like_qPCR_F1	ATCATGGCCAGATTGCATGGGAA	23	RT-qPCR	Solyc05g009310	Made in this study	-
	SlCO-like_qPCR_R1	TCTTGGCCTCTTTTCGGCATTCA	23	RT-qPCR	Solyc05g009310	Made in this study	-
	SlTGA4-like_qPCR_F1	GCTCTTCCGCGTCAAGGCTACG	22	RT-qPCR	Solyc04g011670	Made in this study	-
	SlTGA4-like_qPCR_R1	ACCTCCCGGAGTTGTTGTTCTGT	23	RT-qPCR	Solyc04g011670	Made in this study	-
	SlLCYE_qPCR_F1	TGCTACGATTGAACACCCTTGGT	23	RT-qPCR	Solyc12g008980	Ezura et al., 2024	https://doi.org/10.1111/tpj.16727
	SlLCYE_qPCR_R1	ACCTGTGGCTGGATGAACCATGC	23	RT-qPCR	Solyc12g008980	Ezura et al., 2024	https://doi.org/10.1111/tpj.16727
	SlPORB_qPCR_F1	ACCTCTGCCAGTACCAGTAGTTCTACA	27	RT-qPCR	Solyc10g006900	Ezura et al., 2024	https://doi.org/10.1111/tpj.16727
	SlPORB_qPCR_R1	TGCACTAGCTTTGCCCTTGGAGA	23	RT-qPCR	Solyc10g006900	Ezura et al., 2024	https://doi.org/10.1111/tpj.16727
	SlMPEC_qPCR_F1	TTCAACACCATCAACACCACCA	24	RT-qPCR	Solyc10g077040	Liu et al., New Phytol., 2020	https://doi.org/10.1111/nph.16705
	SlMPEC_qPCR_R1	CTTGGAGGGCTTTGAAGTTGG	23	RT-qPCR	Solyc10g077040	Liu et al., New Phytol., 2020	https://doi.org/10.1111/nph.16705
	SlCAB1C_qPCR_F1	CTTGTAACTTCAACTCATCACAGCAAAC	28	RT-qPCR	Solyc02g071010	Ezura et al., 2024	https://doi.org/10.1111/tpj.16727
	SlCAB1C_qPCR_R1	GAAGAAAGAGCCATTGTAGCAGCTGCC	27	RT-qPCR	Solyc02g071010	Ezura et al., 2024	https://doi.org/10.1111/tpj.16727

## Sheet: Table S2
	Table S2. Expression (logCPM) in u allele and CR-Slglk2-4 allele fruits
		u_base			CR4_base			CR4_tip
	ID	rep1	rep2	rep3	rep1	rep2	rep3	rep1	rep2	rep3
	Solyc00g007350	-4.16498	-4.16498	-4.16498	-4.16498	-3.20539	-4.16498	-4.16498	-4.16498	-4.16498	-4.16498	-3.84511	-4.16498
	Solyc00g011560	-4.16498	-4.16498	-3.2421	-4.16498	-2.65171	-4.16498	-4.16498	-4.16498	-4.16498	-3.85735	-3.66056	-4.16498
	Solyc00g011660	-4.16498	-4.16498	-4.16498	-4.16498	-4.16498	-4.16498	-4.16498	-4.16498	-3.09034	-4.16498	-4.16498	-3.80677
	Solyc00g013170	-3.13782	-4.16498	-4.16498	-4.16498	-4.16498	-4.16498	-4.16498	-4.16498	-4.16498	-3.82259	-4.16498	-4.16498
	Solyc00g013180	-4.16498	-4.16498	-4.16498	-2.59396	-4.16498	-4.16498	-4.16498	-4.16498	-4.16498	-4.16498	-3.6413	-4.16498
	Solyc00g014800	-4.16498	-4.16498	-4.16498	-4.16498	-4.16498	-3.15874	-4.16498	-4.16498	-4.16498	-4.16498	-3.82957	-4.16498
	Solyc00g014850	-4.16498	-2.55421	-4.16498	-4.16498	-4.16498	-3.15874	-4.16498	-4.16498	-4.16498	-3.62806	-3.82957	-4.16498
	Solyc00g015600	-3.56185	-4.16498	-4.16498	-4.16498	-4.16498	-4.16498	-4.16498	-4.16498	-4.16498	-3.96394	-4.16498	-4.16498
	Solyc00g019730	-1.80916	-2.55421	-4.16498	-4.16498	-4.16498	-3.15874	-4.16498	-4.16498	-4.16498	-2.84279	-3.82957	-4.16498
	Solyc00g019750	-4.16498	-4.16498	-4.16498	-4.16498	-4.16498	-4.16498	-3.11525	-4.16498	-4.16498	-4.16498	-4.16498	-3.81507
	Solyc00g019950	-1.79983	-4.16498	-4.16498	-4.16498	-4.16498	-4.16498	-4.16498	-4.16498	-4.16498	-3.3766	-4.16498	-4.16498
	Solyc00g019970	-4.16498	-4.16498	-4.16498	-4.16498	-4.16498	-4.16498	-4.16498	-4.16498	-3.09034	-4.16498	-4.16498	-3.80677
	Solyc00g020030	-4.16498	-3.14558	-4.16498	-4.16498	-4.16498	-4.16498	-4.16498	-4.16498	-4.16498	-3.82518	-4.16498	-4.16498
	Solyc00g020040	-4.16498	-4.16498	-4.16498	-4.16498	-4.16498	-4.16498	-4.16498	-2.62095	-4.16498	-4.16498	-4.16498	-3.6503
	Solyc00g021630	-2.12442	-4.16498	-4.16498	-3.17542	-4.16498	-4.16498	-4.16498	-4.16498	-2.48133	-3.48479	-3.83513	-3.60376
	Solyc00g021640	-4.16498	-4.16498	-4.16498	-4.16498	-3.20539	-3.15874	-4.16498	-4.16498	-4.16498	-4.16498	-3.5097	-4.16498
	Solyc00g022100	-3.13782	-3.14558	-4.16498	-3.3495	-4.16498	-4.16498	-4.16498	-4.16498	-2.54793	-3.48279	-3.89315	-3.62596
	Solyc00g025290	-4.16498	-4.16498	-4.16498	-4.16498	-4.16498	-4.16498	-3.11525	-1.63137	-2.48133	-4.16498	-4.16498	-2.40932
	Solyc00g025400	-4.16498	-4.16498	-4.16498	-4.16498	-4.16498	-4.16498	-3.11525	-3.19557	-3.09034	-4.16498	-4.16498	-3.13372
	Solyc00g028960	-3.13782	-4.16498	-3.2421	-3.17542	-3.20539	-2.57171	-4.16498	-4.16498	-4.16498	-3.51496	-2.98417	-4.16498
	Solyc00g036520	-4.16498	-4.16498	-4.16498	-3.17542	-4.16498	-4.16498	-4.16498	-4.16498	-4.16498	-4.16498	-3.83513	-4.16498
	Solyc00g049210	-4.16498	-4.16498	-4.16498	-3.17542	-2.63415	-2.57171	-3.11525	-3.19557	-4.16498	-4.16498	-2.79376	-3.49193
	Solyc00g052430	-4.16498	-4.16498	-4.16498	-4.16498	-4.16498	-3.15874	-4.16498	-3.19557	-3.09034	-4.16498	-3.82957	-3.48363
	Solyc00g069880	-3.13782	-4.16498	-4.16498	-4.16498	-4.16498	-4.16498	-4.16498	-4.16498	-4.16498	-3.82259	-4.16498	-4.16498
	Solyc00g094520	-4.16498	-4.16498	-4.16498	-4.16498	-3.20539	-4.16498	-2.51409	-4.16498	-4.16498	-4.16498	-3.84511	-3.61468
	Solyc00g094530	-4.16498	-2.55421	-4.16498	-4.16498	-4.16498	-4.16498	-4.16498	-4.16498	-4.16498	-3.62806	-4.16498	-4.16498
	Solyc00g125980	-4.16498	-3.14924	-2.68379	-3.17542	-3.20539	-2.15563	-3.11525	-4.16498	-4.16498	-3.33267	-2.84548	-3.81507
	Solyc00g125990	-1.79983	-4.16498	-4.16498	-2.59396	-3.20539	-4.16498	-4.16498	-4.16498	-4.16498	-3.3766	-3.32144	-4.16498
	Solyc00g126000	-4.16498	-4.16498	-4.16498	-4.16498	-4.16498	-2.57171	-4.16498	-3.19557	-4.16498	-4.16498	-3.63389	-3.84184
	Solyc00g126010	-4.16498	-4.16498	-4.16498	-4.16498	-4.16498	-3.15874	-4.16498	-4.16498	-4.16498	-4.16498	-3.82957	-4.16498
	Solyc00g142170	-4.16498	-4.16498	-4.16498	-4.16498	-4.16498	-4.16498	-4.16498	-4.16498	-3.09034	-4.16498	-4.16498	-3.80677
	Solyc00g180440	-4.16498	-4.16498	-4.16498	-4.16498	-4.16498	-4.16498	-4.16498	-2.62095	-4.16498	-4.16498	-4.16498	-3.6503
	Solyc00g230070	-4.16498	-4.16498	-4.16498	-4.16498	-4.16498	-2.57171	-4.16498	-2.96572	-4.16498	-4.16498	-3.63389	-3.76522
	Solyc00g244290	-4.16498	-4.16498	-4.16498	-3.17542	-4.16498	-4.16498	-2.09102	-4.16498	-4.16498	-4.16498	-3.83513	-3.47366
	Solyc00g244300	-4.16498	-3.14558	-2.68379	-1.59746	-1.90826	-1.83309	-3.11525	-3.19557	-2.05442	-3.33145	-1.7796	-2.78841
	Solyc00g316530	-3.13782	-3.14558	-4.16498	-4.16498	-4.16498	-4.16498	-4.16498	-4.16498	-4.16498	-3.48279	-4.16498	-4.16498
	Solyc00g500003	-3.13782	-4.16498	-4.16498	-3.17542	-3.20539	-4.16498	-4.16498	-3.19557	-3.09034	-3.82259	-3.51526	-3.48363
	Solyc00g500020	-3.13782	-2.55421	-3.2421	-1.8598	-1.91741	-1.56964	-2.09102	-2.21111	-1.45768	-2.97804	-1.78228	-1.91994
	Solyc00g500021	-0.5306	-0.222093	-0.984982	0.137044	0.280266	0.490827	0.250012	-0.521534	0.0599202	-0.579225	0.302712	-0.0705338
	Solyc00g500022	-3.13782	-2.55421	-2.28226	-1.37557	-0.154543	-1.15408	-1.2734	-0.636608	-1.45768	-2.6581	-0.894732	-1.12256
	Solyc00g500023	-0.5306	-1.13121	-0.984982	-0.277642	-0.779879	-0.453047	-1.2734	-0.898593	-1.23194	-0.882263	-0.503523	-1.13464
	Solyc00g500024	0.587253	-0.808326	-1.30277	0.0630985	-0.334456	-0.153308	-1.2734	-2.62095	-1.03679	-0.507949	-0.141555	-1.64371
	Solyc00g500025	-4.16498	-4.16498	-4.16498	-4.16498	-4.16498	-4.16498	-4.16498	-4.16498	-3.09034	-4.16498	-4.16498	-3.80677
	Solyc00g500027	-0.656533	-4.16498	-1.71094	-0.377078	-1.52068	-4.16498	-2.09102	-4.16498	-3.09034	-2.17748	-2.02091	-3.11544
	Solyc00g500028	-1.31137	-4.16498	-4.16498	-4.16498	-4.16498	-3.15874	-4.16498	-3.19557	-3.09034	-3.21377	-3.82957	-3.48363
	Solyc00g500029	-4.16498	-4.16498	-4.16498	-4.16498	-4.16498	-4.16498	-3.13175	-4.16498	-4.16498	-4.16498	-4.16498	-3.82057
	Solyc00g500030	-4.16498	-4.16498	-4.16498	-4.16498	-2.63415	-4.16498	-1.49806	-4.16498	-4.16498	-4.16498	-3.6547	-3.27601
	Solyc00g500031	-3.13782	-1.54784	-1.71094	-2.18067	-4.16498	-2.57171	-4.16498	-3.19557	-4.16498	-2.1322	-2.97245	-3.84184
	Solyc00g500032	-2.54391	-4.16498	-1.71094	-2.18067	-2.63415	-4.16498	-3.11525	-1.89231	-2.48133	-2.80661	-2.99327	-2.4963
	Solyc00g500033	-4.16498	-4.16498	-3.2421	-4.16498	-4.16498	-4.16498	-4.16498	-4.16498	-4.16498	-3.85735	-4.16498	-4.16498
	Solyc00g500034	-1.79983	-3.14558	-3.2421	-1.8598	-4.16498	-2.57171	-3.11525	-1.89231	-2.05442	-2.72917	-2.86549	-2.354
	Solyc00g500035	0.907943	-0.349538	1.41062	1.36858	1.53811	1.2788	0.643183	0.537424	1.22947	0.656342	1.39516	0.803358
	Solyc00g500036	0.725346	0.417893	1.21723	1.08984	1.06162	1.09035	-0.921754	0.518723	-0.0587682	0.786823	1.0806	-0.153933
	Solyc00g500037	-1.79983	-2.13598	-2.68379	-1.8598	-2.63415	-3.15874	-1.76429	-1.89231	-1.23194	-2.20653	-2.5509	-1.62951
	Solyc00g500039	2.57483	0.826522	-0.984982	0.672769	0.456721	0.934565	-0.374032	-0.0533951	-0.329626	0.805458	0.688019	-0.252351
	Solyc00g500041	0.133991	-4.16498	0.223699	-0.787366	-4.16498	-4.16498	-4.16498	-0.638286	-1.45768	-1.2691	-3.03911	-2.08698
	Solyc00g500042	-4.16498	-1.13121	-2.8458	-2.18067	-1.06769	-1.47617	-1.76429	-4.16498	-1.22652	-2.71399	-1.57485	-2.38526
	Solyc00g500047	0.562538	1.1545	-1.22593	1.43774	1.31996	1.33789	0.779637	0.587201	0.237563	0.1637	1.3652	0.5348
	Solyc00g500048	-0.947111	-1.32453	-1.9685	-0.861902	-1.90826	-3.15874	-2.51409	-3.19557	-2.05442	-1.41338	-1.9763	-2.58803
	Solyc00g500049	-1.38424	-4.16498	-4.16498	-2.70638	-0.405039	-1.66366	-2.01948	-3.1984	-4.16498	-3.23807	-1.59169	-3.12762
	Solyc00g500050	0.682086	1.08198	-4.16498	-4.16498	1.51925	-4.16498	-0.0284403	-4.16498	1.16292	-0.800305	-2.27024	-1.01017
	Solyc00g500051	-2.54391	-2.13598	-1.71094	-3.17542	-4.16498	-1.56964	-3.11525	-2.62	-1.72541	-2.13028	-2.97001	-2.48689
	Solyc00g500052	-4.16498	-4.16498	-4.16498	-4.16498	-1.90826	-4.16498	-4.16498	-4.16498	-4.16498	-4.16498	-3.41274	-4.16498
	Solyc00g500054	2.29762	0.0413643	0.326968	1.27397	1.18127	0.891485	0.572889	0.0244231	0.221552	0.88865	1.11557	0.272955
	Solyc00g500055	-2.12442	-3.14558	-4.16498	-2.59396	-3.20539	-1.83309	-4.16498	-4.16498	-2.48133	-3.145	-2.54414	-3.60376
	Solyc00g500056	-0.656533	-0.960753	-1.49247	-0.0148423	-1.06769	-0.346064	-1.2734	-1.41047	-1.03679	-1.03659	-0.476199	-1.24022
	Solyc00g500057	-0.5306	-4.16498	-1.13515	-0.861902	-0.779879	-1.83309	-4.16498	-4.16498	-0.711361	-1.94357	-1.15829	-3.01377
	Solyc00g500058	-3.13782	-4.16498	-4.16498	-4.16498	-4.16498	-2.57171	-4.16498	-2.62095	-3.09034	-3.82259	-3.63389	-3.29209
	Solyc00g500059	-4.16498	-4.16498	-4.16498	-4.16498	-3.20539	-4.16498	-4.16498	-4.16498	-4.16498	-4.16498	-3.84511	-4.16498
	Solyc00g500060	-4.16498	-4.16498	-2.28297	-4.16498	-4.16498	-4.16498	-4.16498	-4.16498	-4.16498	-3.53764	-4.16498	-4.16498
	Solyc00g500061	-2.54391	-4.16498	-2.68379	-2.18067	-1.64801	-2.57171	-4.16498	-3.19557	-2.48133	-3.13089	-2.13346	-3.28063
	Solyc00g500062	-4.16498	-3.14558	-3.2421	-1.1833	-2.22602	-1.34695	-2.51409	-3.19557	-1.72541	-3.51755	-1.58543	-2.47836
	Solyc00g500063	3.70239	0.730223	0.540172	1.51491	1.0406	1.13658	0.250012	0.29948	0.366335	1.6576	1.2307	0.305276
	Solyc00g500064	1.84219	0.959897	1.53729	2.33785	1.86279	2.47511	1.73849	0.984334	1.6784	1.44646	2.22525	1.46707
	Solyc00g500065	-2.54391	-3.14558	-4.16498	-3.17542	-4.16498	-2.57171	-4.16498	-3.19557	-4.16498	-3.28482	-3.30404	-3.84184
	Solyc00g500073	-4.16498	-4.16498	-4.16498	-4.16498	-2.92534	-4.16498	-4.16498	-4.16498	-4.16498	-4.16498	-3.75176	-4.16498
	Solyc00g500085	-4.16498	-4.16498	-2.28226	-3.17542	-4.16498	-3.15874	-4.16498	-4.16498	-4.16498	-3.53741	-3.49971	-4.16498
	Solyc00g500086	-4.16498	-1.72082	-4.16498	-4.16498	-0.91662	-1.56964	-1.49806	-4.16498	-4.16498	-3.35026	-2.21708	-3.27601
	Solyc00g500087	-2.12442	-3.14558	-3.2421	-2.59396	-4.16498	-2.57171	-4.16498	-4.16498	-4.16498	-2.83737	-3.11021	-4.16498
	Solyc00g500088	-1.53261	-4.16498	-4.16498	-4.16498	-4.16498	-4.16498	-4.16498	-4.16498	-4.16498	-3.28752	-4.16498	-4.16498
	Solyc00g500089	-4.16498	-4.16498	-4.16498	-4.16498	-4.16498	-3.15874	-4.16498	-4.16498	-4.16498	-4.16498	-3.82957	-4.16498
	Solyc00g500091	-4.16498	-4.16498	-4.16498	-4.16498	-4.16498	-4.16498	-3.04751	-4.16498	-3.01218	-4.16498	-4.16498	-3.40822
	Solyc00g500093	-4.16498	-4.16498	-4.16498	-4.16498	-4.16498	-4.16498	-2.51409	-4.16498	-4.16498	-4.16498	-4.16498	-3.61468
	Solyc00g500095	-4.16498	-1.30297	-2.37939	-1.46028	-4.16498	-1.83309	-3.11525	-0.946642	-4.16498	-2.61578	-2.48611	-2.74229
	Solyc00g500096	-4.16498	-1.99893	-4.16498	-4.16498	-4.16498	-4.16498	-4.16498	-4.16498	-4.16498	-3.44296	-4.16498	-4.16498
	Solyc00g500098	-4.16498	-3.14558	-1.9685	-4.16498	-4.16498	-2.57171	-4.16498	-4.16498	-4.16498	-3.09302	-3.63389	-4.16498
	Solyc00g500099	-1.31137	-3.14558	-4.16498	-4.16498	-3.20539	-3.15874	-2.51409	-4.16498	-3.09034	-2.87398	-3.5097	-3.25647
	Solyc00g500100	-1.31137	-4.16498	-1.49247	-4.16498	-4.16498	-4.16498	-4.16498	-4.16498	-1.58828	-2.32294	-4.16498	-3.30608
	Solyc00g500101	-4.16498	-4.16498	-4.16498	-4.16498	-4.16498	-4.16498	-4.16498	-3.19557	-4.16498	-4.16498	-4.16498	-3.84184
	Solyc00g500104	-4.16498	-4.16498	-4.16498	-4.16498	-4.16498	-1.69326	-4.16498	-4.16498	-4.16498	-4.16498	-3.34107	-4.16498
	Solyc00g500105	-4.16498	-4.16498	-2.20415	-2.55245	-4.16498	-1.39329	-1.76429	-4.16498	-4.16498	-3.51137	-2.70357	-3.36475
	Solyc00g500117	-4.16498	-3.14558	-4.16498	-1.8598	-4.16498	-4.16498	-4.16498	-2.16339	-1.87696	-3.82518	-3.39658	-2.73511
	Solyc00g500125	-4.16498	-4.16498	-1.6349	-4.16498	-4.16498	-1.22836	-4.16498	-1.63137	-2.06406	-3.32162	-3.1861	-2.62014
	Solyc00g500130	5.51898	3.08275	2.4593	3.38439	3.13725	3.2311	3.28097	3.02152	3.24651	3.68701	3.25091	3.183
	Solyc00g500134	-4.16498	-4.16498	-4.16498	-4.16498	-1.4276	-4.16498	-4.16498	-4.16498	-4.16498	-4.16498	-3.25252	-4.16498
	Solyc00g500139	-4.16498	-1.54784	-4.16498	-4.16498	-4.16498	-4.16498	-1.49806	-3.19557	-4.16498	-3.2926	-4.16498	-2.95287
	Solyc00g500140	-1.53502	-1.32453	-1.30277	-0.72459	-1.4276	-0.246469	-1.49806	-1.41047	-2.05442	-1.38744	-0.799554	-1.65432
	Solyc00g500143	-4.16498	-2.55421	-2.28156	-4.16498	-4.16498	-4.16498	-4.16498	-3.19557	-4.16498	-3.00025	-4.16498	-3.84184
	Solyc00g500145	-4.16498	-4.16498	-4.16498	-4.16498	-4.16498	-4.16498	-2.09102	-4.16498	-4.16498	-4.16498	-4.16498	-3.47366
	Solyc00g500146	-2.34291	-2.55421	-1.85886	-1.59722	-1.1635	-1.48115	-2.5131	-3.19557	-4.16498	-2.252	-1.41396	-3.29122
	Solyc00g500155	-4.16498	-3.14558	-4.16498	-4.16498	-4.16498	-3.15874	-4.16498	-4.16498	-3.09034	-3.82518	-3.82957	-3.80677
	Solyc00g500157	-4.16498	-4.16498	-2.28226	-3.17542	-4.16498	-4.16498	-3.53565	-3.60034	-4.16498	-3.53741	-3.83513	-3.76699
	Solyc00g500158	-1.31137	-3.14558	-4.16498	-2.18067	-4.16498	-4.16498	-4.16498	-4.16498	-4.16498	-2.87398	-3.50354	-4.16498
	Solyc00g500168	-4.16498	-4.16498	-4.16498	-4.16498	-4.16498	-4.16498	-3.11525	-4.16498	-4.16498	-4.16498	-4.16498	-3.81507
	Solyc00g500169	-0.794518	-4.16498	-4.16498	-2.59396	-2.63415	-4.16498	-2.09102	-2.21111	-1.72541	-3.04149	-3.13103	-2.00918
	Solyc00g500171	-3.13782	-4.16498	-4.16498	-2.59396	-4.16498	-3.15874	-4.16498	-4.16498	-4.16498	-3.82259	-3.30589	-4.16498
	Solyc00g500172	-2.54391	-4.16498	-4.16498	-3.17542	-3.20539	-4.16498	-3.11525	-2.62095	-4.16498	-3.62462	-3.51526	-3.30039
	Solyc00g500175	-4.16498	-4.16498	-4.16498	-4.16498	-3.06079	-4.16498	-3.11525	-4.16498	-4.16498	-4.16498	-3.79692	-3.81507
	Solyc00g500176	-2.54391	-4.16498	-3.2421	-4.16498	-2.3053	-4.16498	-4.16498	-4.16498	-3.09034	-3.317	-3.54509	-3.80677
	Solyc00g500182	-1.13472	-2.34755	-4.16498	-4.16498	-4.16498	-4.16498	-4.16498	-1.77824	-4.16498	-2.54908	-4.16498	-3.3694
	Solyc00g500184	-2.54391	-4.16498	-2.28226	-4.16498	-3.20539	-4.16498	-4.16498	-2.62095	-4.16498	-2.99705	-3.84511	-3.6503
	Solyc00g500185	-4.16498	-4.16498	-4.16498	-4.16498	-4.16498	-3.15874	-4.16498	-4.16498	-4.16498	-4.16498	-3.82957	-4.16498
	Solyc00g500186	-0.821853	-2.55421	-1.98438	-4.16498	-1.92461	-2.57171	-4.16498	-4.16498	-1.03679	-1.78682	-2.8871	-3.12225
	Solyc00g500187	-2.12442	-4.16498	-4.16498	-2.59396	-4.16498	-2.57171	-2.51409	-4.16498	-1.23194	-3.48479	-3.11021	-2.637
	Solyc00g500190	-1.31137	-4.16498	-4.16498	-4.16498	-4.16498	-4.16498	-3.11525	-4.16498	-4.16498	-3.21377	-4.16498	-3.81507
	Solyc00g500191	-4.16498	-4.16498	-4.16498	-2.18067	-3.20539	-4.16498	-4.16498	-4.16498	-4.16498	-4.16498	-3.18368	-4.16498
	Solyc00g500192	-4.16498	-4.16498	-4.16498	-4.16498	-4.16498	-4.16498	-4.16498	-4.16498	-1.72541	-4.16498	-4.16498	-3.35179
	Solyc00g500195	-3.13782	-4.16498	-4.16498	-4.16498	-4.16498	-4.16498	-2.51409	-1.63137	-3.09034	-3.82259	-4.16498	-2.41193
	Solyc00g500196	4.28527	1.45772	0.58889	1.33808	1.36947	1.27344	1.28806	0.360767	0.730376	2.11063	1.327	0.793069
	Solyc00g500212	-4.16498	-2.55421	-4.16498	-3.17542	-4.16498	-2.57171	-1.76429	-2.62095	-3.09034	-3.62806	-3.30404	-2.49186
	Solyc00g500214	-3.13782	-4.16498	-4.16498	-4.16498	-1.22025	-4.16498	-4.16498	-4.16498	-4.16498	-3.82259	-3.1834	-4.16498
	Solyc00g500216	-4.16498	-3.14558	-4.16498	-3.17542	-4.16498	-4.16498	-4.16498	-4.16498	-4.16498	-3.82518	-3.83513	-4.16498
	Solyc00g500218	-4.16498	-0.128825	0.58889	-1.37557	-0.980702	-2.3541	-0.071835	-1.21895	0.400436	-1.23497	-1.57013	-0.296783
	Solyc00g500219	-4.16498	-4.16498	-4.16498	-4.16498	-4.16498	-4.16498	-3.11525	-4.16498	-4.16498	-4.16498	-4.16498	-3.81507
	Solyc00g500224	-4.16498	-2.55421	-4.16498	-4.16498	-4.16498	-3.15874	-3.11525	-4.16498	-4.16498	-3.62806	-3.82957	-3.81507
	Solyc00g500227	-2.12442	-4.16498	-4.16498	-2.93763	-2.99753	-4.16498	-1.76429	-1.25693	-2.48133	-3.48479	-3.36671	-1.83418
	Solyc00g500228	0.0558336	-3.14558	-1.9685	-3.0201	-1.64801	-1.34695	-0.61637	-1.89231	-2.99434	-1.68609	-2.00502	-1.83434
	Solyc00g500231	-4.16498	-4.16498	-2.28226	-4.16498	-4.16498	-4.16498	-4.16498	-4.16498	-4.16498	-3.53741	-4.16498	-4.16498
	Solyc00g500234	-2.54391	-3.14558	-3.21174	-3.09127	-1.90826	-3.15874	-4.16498	-4.16498	-2.48133	-2.96708	-2.71943	-3.60376
	Solyc00g500236	-4.16498	-3.14558	-4.16498	-4.16498	-2.63415	-4.16498	-4.16498	-3.19557	-3.09034	-3.82518	-3.6547	-3.48363
	Solyc00g500240	-3.13782	-4.16498	-3.2421	-2.59396	-4.16498	-4.16498	-4.16498	-4.16498	-4.16498	-3.51496	-3.6413	-4.16498
	Solyc00g500241	-2.12442	-4.16498	-4.16498	-4.16498	-4.16498	-4.16498	-4.16498	-4.16498	-4.16498	-3.48479	-4.16498	-4.16498
	Solyc00g500243	-0.794518	0.57253	-1.13515	-0.72459	-0.91662	-1.34695	-0.489635	-0.636608	-0.445998	-0.452378	-0.996053	-0.52408
	Solyc00g500245	-4.16498	-4.16498	-4.16498	-4.16498	-4.16498	-4.16498	-4.16498	-2.26047	-4.16498	-4.16498	-4.16498	-3.53014
	Solyc00g500247	-4.16498	-4.16498	-4.16498	-4.16498	-4.16498	-4.16498	-4.16498	-4.16498	-3.09034	-4.16498	-4.16498	-3.80677
	Solyc00g500249	-2.54391	-3.14558	-4.16498	-4.16498	-4.16498	-4.16498	-4.16498	-4.16498	-4.16498	-3.28482	-4.16498	-4.16498
	Solyc00g500250	-0.0976572	-4.16498	-2.65809	-1.37557	-2.60751	-4.16498	-2.09102	-0.636608	-4.16498	-2.30691	-2.71602	-2.29753
	Solyc00g500254	-3.13782	-3.14558	-4.16498	-4.16498	-4.16498	-1.83309	-4.16498	-4.16498	-4.16498	-3.48279	-3.38768	-4.16498
	Solyc00g500255	-4.16498	-2.55421	-4.16498	-4.16498	-4.16498	-3.15874	-4.16498	-4.16498	-4.16498	-3.62806	-3.82957	-4.16498
	Solyc00g500256	-2.12442	-4.16498	-4.16498	-4.16498	-4.16498	-3.15874	-4.16498	-4.16498	-2.48133	-3.48479	-3.82957	-3.60376
	Solyc00g500257	-4.16498	-1.95151	-1.34406	-1.63316	-1.64801	-2.88325	-4.16498	-1.29537	-0.572587	-2.48685	-2.05481	-2.01098
	Solyc00g500259	-4.16498	-4.16498	-3.27311	-4.16498	-4.16498	-4.16498	-4.16498	-3.17246	-4.16498	-3.86769	-4.16498	-3.83414
	Solyc00g500260	-4.16498	-4.16498	-4.16498	-4.16498	-4.16498	-4.16498	-4.16498	-2.62095	-4.16498	-4.16498	-4.16498	-3.6503
	Solyc00g500261	-2.54391	-4.16498	-4.16498	-4.16498	-4.16498	-3.15874	-4.16498	-4.16498	-4.16498	-3.62462	-3.82957	-4.16498
	Solyc00g500263	-4.16498	-4.16498	-2.68379	-1.63981	-3.15918	-1.69746	-4.16498	-2.13841	-4.16498	-3.67125	-2.16548	-3.48946
	Solyc00g500268	0.694314	-0.808326	0.143454	-0.195563	0.842983	-0.246469	-0.166607	0.417653	-0.121745	0.0098138	0.13365	0.0431003
	Solyc00g500273	-2.54391	-4.16498	-3.2421	-4.16498	-4.16498	-4.16498	-4.16498	-3.19557	-4.16498	-3.317	-4.16498	-3.84184
	Solyc00g500280	-4.16498	-4.16498	-4.16498	-4.16498	-4.16498	-4.16498	-2.51409	-4.16498	-4.16498	-4.16498	-4.16498	-3.61468
	Solyc00g500281	-4.16498	-4.16498	-4.16498	-4.16498	-4.16498	-4.16498	-4.16498	-3.19557	-4.16498	-4.16498	-4.16498	-3.84184
	Solyc00g500290	-2.12442	-2.55421	-3.2421	-1.8598	-4.16498	-3.15874	-2.51409	-4.16498	-4.16498	-2.64025	-3.06117	-3.61468
	Solyc00g500293	-2.90552	-1.81214	-0.848986	0.00314421	-0.817012	-1.48137	-1.31562	-2.61906	-4.16498	-1.85555	-0.765081	-2.69988
	Solyc00g500299	-4.16498	-1.77181	-2.48475	-4.16498	-4.16498	-4.16498	-2.02403	-1.32055	-3.23445	-2.80718	-4.16498	-2.19301
	Solyc00g500302	-0.947111	-2.13598	-4.16498	-4.16498	-3.20539	-4.16498	-2.51409	-4.16498	-4.16498	-2.41602	-3.84511	-3.61468
	Solyc00g500303	-1.30475	-4.16498	-4.16498	-1.8598	-3.20539	-4.16498	-4.16498	-2.62095	-2.48133	-3.21157	-3.07672	-3.08909
	Solyc00g500309	-4.16498	-4.16498	-4.16498	-4.16498	-3.20539	-4.16498	-3.00889	-4.16498	-4.16498	-4.16498	-3.84511	-3.77962
	Solyc00g500311	-2.54391	-4.16498	-4.16498	-2.59396	-4.16498	-2.57171	-3.11525	-4.16498	-4.16498	-3.62462	-3.11021	-3.81507
	Solyc00g500312	-4.16498	-4.16498	-4.16498	-4.16498	-4.16498	-4.16498	-3.11525	-4.16498	-2.05442	-4.16498	-4.16498	-3.11155
	Solyc00g500313	-4.16498	-4.16498	-4.16498	-4.16498	-4.16498	-4.16498	-4.16498	-3.19557	-4.16498	-4.16498	-4.16498	-3.84184
	Solyc00g500314	-4.16498	-4.16498	-1.9685	-4.16498	-4.16498	-4.16498	-1.76429	-3.19557	-1.03679	-3.43282	-4.16498	-1.99888
	Solyc00g500315	-1.53502	-1.1303	-4.16498	-1.1833	-0.91662	-0.831845	-0.266595	-0.222882	-1.23194	-2.27677	-0.977256	-0.573806
	Solyc00g500316	-1.79983	-3.14558	-2.28226	-4.16498	-1.64801	-0.983986	-4.16498	-3.19557	-1.45768	-2.40923	-2.26566	-2.93941
	Solyc00g500319	-4.16498	-4.16498	-4.16498	-4.16498	-4.16498	-4.16498	-4.16498	-3.19557	-4.16498	-4.16498	-4.16498	-3.84184
	Solyc00g500321	-3.13782	-2.13598	-4.16498	-3.17542	-2.63415	-4.16498	-3.11525	-4.16498	-4.16498	-3.14626	-3.32485	-3.81507
	Solyc00g500322	0.133991	-0.428935	-1.13515	0.399902	0.964772	0.0167033	-0.9078	-0.222882	-4.16498	-0.476696	0.460459	-1.76522
	Solyc00g500323	-4.16498	-4.16498	1.26487	2.60867	-4.16362	2.56159	-0.215835	1.13227	-0.626918	-2.35503	0.335548	0.0965044
	Solyc00g500328	-2.12442	-4.16498	-4.16498	-4.16498	-2.63415	-4.16498	-4.16498	-4.16498	-4.16498	-3.48479	-3.6547	-4.16498
	Solyc00g500332	0.424861	-4.16498	-4.16498	-4.16498	0.910548	-4.16498	-4.16498	-4.16498	-4.16498	-2.63503	-2.47314	-4.16498
	Solyc00g500333	-4.16498	-4.16498	-4.16498	-4.16498	-4.16498	-4.16498	-4.16498	-4.16498	-0.865405	-4.16498	-4.16498	-3.06512
	Solyc00g500335	-1.31137	-3.14558	-1.71094	-2.18067	-1.90826	-0.831845	-4.16498	-2.21111	-1.72541	-2.05596	-1.64026	-2.7005
	Solyc00g500339	-4.16498	-4.16498	-4.16498	-4.16498	-4.16498	-4.16498	-4.16498	-3.19557	-4.16498	-4.16498	-4.16498	-3.84184
	Solyc00g500343	-2.12442	-2.55421	-4.16498	-4.16498	-1.90826	-4.16498	-4.16498	-4.16498	-4.16498	-2.94787	-3.41274	-4.16498
	Solyc00g500344	-3.13782	-4.16498	-4.16498	-4.16498	-3.20539	-4.16498	-3.11525	-4.16498	-4.16498	-3.82259	-3.84511	-3.81507
	Solyc00g500345	-4.16498	-2.56639	-1.48862	-1.00346	-2.89959	-1.55288	-4.16498	-2.86349	-4.16498	-2.74	-1.81865	-3.73115
	Solyc00g500351	-2.42482	-4.16498	-4.16498	-3.13378	-2.63415	-2.22904	-4.16498	-3.19557	-4.16498	-3.58493	-2.66565	-3.84184
	Solyc00g500353	-1.77533	-0.101361	-2.75205	-2.32572	-4.16498	-4.16498	-4.16498	-2.75756	-4.16498	-1.54291	-3.55189	-3.69584
	Solyc00g500358	1.44231	-1.31937	-1.30615	-0.606924	-0.0318653	-0.57705	-1.2734	0.200431	-0.221944	-0.394405	-0.40528	-0.431637
	Solyc00g500362	-3.13782	-3.14558	-4.16498	-4.16498	-4.16498	-4.16498	-4.16498	-4.16498	-4.16498	-3.48279	-4.16498	-4.16498
	Solyc00g500363	-4.16498	-4.16498	-4.16498	-4.16498	-4.16498	-3.15874	-4.16498	-4.16498	-4.16498	-4.16498	-3.82957	-4.16498
	Solyc00g500373	2.08692	2.15558	2.64773	1.82807	2.08998	2.0244	1.80431	1.99207	1.12365	2.29674	1.98081	1.64001
	Solyc00g500381	-4.16498	-3.14558	-4.16498	-4.16498	-4.16498	-4.16498	-4.16498	-4.16498	-4.16498	-3.82518	-4.16498	-4.16498
	Solyc00g500405	-4.16498	-4.16498	-3.2421	-4.16498	-4.16498	-3.08668	-4.16498	-4.16498	-4.16498	-3.85735	-3.80555	-4.16498
	Solyc00g500406	-4.16498	-4.16498	-2.68379	-4.16498	-2.54809	-2.15563	-4.16498	-4.16498	-4.16498	-3.67125	-2.95623	-4.16498
	Solyc00g500409	-4.16498	-4.16498	-4.16498	-3.17542	-4.16498	-4.16498	-4.16498	-4.16498	-4.16498	-4.16498	-3.83513	-4.16498
	Solyc01g005000	6.56842	6.70558	6.88229	6.57396	6.56927	7.16883	7.24993	7.33496	7.43954	6.71876	6.77069	7.34148
	Solyc01g005010	4.78052	4.79532	4.90792	4.57233	4.69866	5.09537	4.43102	5.11978	5.12759	4.82792	4.78879	4.8928
	Solyc01g005020	6.2584	6.05219	6.51955	6.35904	6.33994	6.08944	6.41254	6.1773	6.21656	6.27671	6.2628	6.2688
	Solyc01g005030	5.07863	4.74999	5.26904	4.86517	5.13255	5.05446	5.10508	5.10643	4.85378	5.03255	5.01739	5.02176
	Solyc01g005040	-4.16498	-4.16498	-4.16498	-4.16498	-4.16498	-4.16498	-4.16498	-4.16498	-2.48133	-4.16498	-4.16498	-3.60376
	Solyc01g005050	-4.16498	-4.16498	-3.2421	-4.16498	-3.20539	-4.16498	-4.16498	-4.16498	-3.09034	-3.85735	-3.84511	-3.80677
	Solyc01g005060	2.92187	2.95009	2.35049	2.35345	2.18029	2.66754	1.17826	2.05939	2.02292	2.74081	2.40042	1.75352
	Solyc01g005070	-2.12442	-3.14558	-2.28226	-3.17542	-3.20539	-4.16498	-3.11525	-4.16498	-2.48133	-2.51742	-3.51526	-3.25385
	Solyc01g005080	4.85673	4.35726	5.31783	4.50421	4.838	4.99465	4.57644	4.67417	4.79089	4.84394	4.77895	4.6805
	Solyc01g005100	3.80152	3.8564	3.89615	3.6934	3.98694	4.20937	3.91544	3.92821	4.17491	3.85136	3.96324	4.00619
	Solyc01g005110	3.28941	3.03316	3.06974	2.90168	3.13725	3.13279	2.86278	3.36596	3.41445	3.13077	3.05724	3.2144
	Solyc01g005120	3.03822	3.37319	3.39832	3.18051	2.57397	2.73	2.2354	2.3902	2.59392	3.26991	2.82816	2.40651
	Solyc01g005130	2.24575	2.44301	2.29284	2.41419	2.29311	2.57527	2.42362	2.43201	2.83741	2.3272	2.42752	2.56435
	Solyc01g005140	-0.794518	-2.13598	-0.144369	-4.16498	-1.4276	-1.34695	-1.76429	-1.41047	-1.45768	-1.02496	-2.31318	-1.54415
	Solyc01g005150	-0.307577	-0.128825	-0.6103	-1.1833	-0.433591	0.306335	-1.76429	-0.636608	-0.329626	-0.348901	-0.436853	-0.910174
	Solyc01g005160	-4.16498	-1.81214	-4.16498	-1.59746	-3.20539	-4.16498	-4.16498	-2.62095	-4.16498	-3.3807	-2.98928	-3.6503
	Solyc01g005180	-4.16498	-1.54784	-3.2421	-3.17542	-2.63415	-2.57171	-3.11525	-4.16498	-2.05442	-2.98497	-2.79376	-3.11155
	Solyc01g005210	5.51702	5.29154	5.79162	5.44526	5.7911	5.42691	5.6521	5.52817	5.4213	5.53339	5.55442	5.53385
	Solyc01g005220	2.89966	3.07297	3.61374	3.22358	3.37552	2.70534	3.42415	3.45296	3.62173	3.19546	3.10148	3.49961
	Solyc01g005230	-0.207789	-0.544656	0.58889	0.515312	0.511049	0.976396	-0.754739	0.168497	1.29909	-0.0545185	0.667586	0.237616
	Solyc01g005240	6.86109	6.63674	6.9245	6.93712	6.94062	6.99657	6.9474	6.89797	6.87613	6.80744	6.9581	6.90717
	Solyc01g005250	6.50449	6.52817	6.44305	6.58719	6.38721	6.4868	6.69269	6.60055	6.65914	6.4919	6.48707	6.65079
	Solyc01g005253	2.17357	2.23064	1.88814	2.27373	2.00208	2.29027	2.40749	2.18331	2.16855	2.09745	2.18869	2.25312
	Solyc01g005257	2.45815	2.86194	2.95363	2.91237	2.77606	3.10477	2.90935	3.24114	3.31962	2.7579	2.93107	3.1567
	Solyc01g005280	4.93041	5.05836	4.60158	5.14717	5.17657	5.06177	5.13967	5.52144	5.46021	4.86345	5.1285	5.37378
	Solyc01g005290	0.887195	1.706	1.26487	1.64732	1.7086	1.60212	1.9975	2.35879	2.38839	1.28602	1.65268	2.24823
	Solyc01g005300	1.44231	1.60076	1.26487	1.92289	2.26176	2.15109	1.76405	1.70495	1.50118	1.43598	2.11191	1.65672
	Solyc01g005310	-3.13782	-2.55421	-2.68379	-4.16498	-3.20539	-2.57171	-3.11525	-4.16498	-4.16498	-2.79194	-3.31402	-3.81507
	Solyc01g005320	-1.31137	-0.428935	-1.13515	-0.277642	-1.23645	-0.694228	-1.2734	-1.89231	0.142838	-0.958482	-0.736108	-1.00762
	Solyc01g005330	6.69457	6.72137	6.85649	6.88087	6.73964	6.93474	6.80289	6.84617	6.84706	6.75748	6.85175	6.83204
	Solyc01g005340	4.81058	4.68088	5.15239	5.06439	5.12603	5.07386	5.07729	5.102	5.02749	4.88128	5.08809	5.06892
	Solyc01g005350	-4.16498	-4.16498	-4.16498	-4.16498	-3.20539	-4.16498	-4.16498	-4.16498	-3.09034	-4.16498	-3.84511	-3.80677
	Solyc01g005370	3.0584	3.14943	2.8069	2.65973	2.80926	2.76623	3.26315	3.41012	3.31068	3.00491	2.74507	3.32798
	Solyc01g005380	3.65679	3.54579	3.82167	3.81977	3.99649	3.6803	3.82724	3.70417	3.76136	3.67475	3.83219	3.76426
	Solyc01g005390	-2.54391	-1.81214	-4.16498	-2.18067	-2.63415	-3.15874	-2.51409	-2.21111	-3.09034	-2.84034	-2.65785	-2.60518
	Solyc01g005400	0.841338	1.08198	1.20362	0.207383	0.14937	1.20472	0.513837	0.729407	1.83622	1.04231	0.52049	1.02649
	Solyc01g005410	4.7031	4.56346	4.58966	4.40657	4.90039	4.58553	4.0566	4.11609	4.21857	4.61874	4.63083	4.13042
	Solyc01g005420	2.94373	3.34907	2.26313	3.50066	3.22112	2.92419	3.33314	3.46697	3.15958	2.85198	3.21533	3.3199
	Solyc01g005430	3.07831	3.25703	3.12859	2.84764	3.20473	3.08579	3.04066	3.32041	3.09857	3.15464	3.04606	3.15321
	Solyc01g005440	7.59293	7.54053	7.26847	7.33827	7.56283	7.36029	7.4532	7.50097	7.32339	7.46731	7.42046	7.42585
	Solyc01g005450	2.21011	2.04295	1.8081	1.85877	2.03952	1.75415	1.60339	1.68112	1.75947	2.02039	1.88415	1.68132
	Solyc01g005460	2.24575	2.62809	1.92655	1.83675	1.75436	2.33918	1.81386	2.05939	1.78551	2.2668	1.97676	1.88625
	Solyc01g005470	-1.79983	-3.14558	-4.16498	-1.59746	-0.334456	-1.83309	-4.16498	-2.62095	-3.09034	-3.0368	-1.255	-3.29209
	Solyc01g005480	2.47326	2.80398	2.72209	2.78001	2.42629	2.60224	2.6734	2.95352	2.47094	2.66644	2.60285	2.69929
	Solyc01g005490	4.87174	4.81011	4.88616	4.5623	4.6328	4.66122	4.6157	4.40996	4.85685	4.856	4.61878	4.6275
	Solyc01g005510	-1.53502	-1.32453	1.46083	-1.59746	0.511049	-0.153308	-3.11525	-2.62095	0.882894	-0.466244	-0.41324	-1.61777
	Solyc01g005520	5.40661	5.46034	5.66101	6.14056	5.94542	5.67718	5.12249	4.87658	5.18984	5.50932	5.92105	5.06297
	Solyc01g005530	1.58827	2.26542	1.43441	1.33808	1.7086	1.84727	1.60339	1.79651	2.28265	1.7627	1.63132	1.89419
	Solyc01g005540	4.08342	3.97145	4.16874	4.29394	4.2571	4.23545	4.02523	3.90782	3.78091	4.07454	4.26216	3.90465
	Solyc01g005550	6.67046	6.69929	6.51325	6.51799	6.41665	6.43605	6.26925	6.37684	6.42936	6.62767	6.4569	6.35848
	Solyc01g005560	6.52131	6.77217	6.35864	6.5437	6.60405	6.50815	6.02417	6.19002	6.09557	6.55071	6.55197	6.10325
	Solyc01g005570	3.96011	4.26146	4.02566	3.93826	3.96764	4.371	4.22774	4.39246	4.20417	4.08241	4.0923	4.27479
	Solyc01g005580	4.6536	4.66788	4.47896	4.60745	4.4947	4.56511	4.59033	4.91284	4.70481	4.60015	4.55576	4.73599
	Solyc01g005590	6.06426	6.37522	5.86664	5.91079	5.76692	5.84181	5.61757	6.17089	6.12516	6.10204	5.83984	5.97121
	Solyc01g005600	5.53624	5.56001	5.72507	5.66192	5.6555	5.5003	5.59626	5.67411	5.75163	5.6071	5.60591	5.674
	Solyc01g005620	8.8823	8.93137	8.71995	8.91771	8.62901	8.77743	9.08397	9.12922	9.19701	8.84454	8.77472	9.13673
	Solyc01g005640	4.43945	4.3693	4.37155	4.14504	4.57978	4.6288	4.33768	4.55468	4.72514	4.39344	4.45121	4.53917
	Solyc01g005660	-1.79983	-4.16498	-2.28226	-3.17542	-3.20539	-3.15874	-4.16498	-3.19557	-3.09034	-2.74902	-3.17985	-3.48363
	Solyc01g005670	2.72127	2.34886	2.86739	2.13625	2.58667	2.74218	2.25357	2.91317	2.74754	2.64584	2.48837	2.63809
	Solyc01g005680	-0.947111	-2.13598	-2.68379	-4.16498	-4.16498	-3.15874	-4.16498	-3.19557	-4.16498	-1.92229	-3.82957	-3.84184
	Solyc01g005690	5.85602	5.77514	5.80598	5.86505	5.78103	5.45848	5.85902	5.52479	5.60067	5.81238	5.70152	5.66149
	Solyc01g005700	4.1366	4.13552	4.26931	4.4111	4.07072	4.17835	4.32055	4.08626	4.32893	4.18048	4.22005	4.24525
	Solyc01g005710	-2.54391	-2.13598	-1.71094	-3.17542	-3.20539	-3.15874	-4.16498	-2.21111	-2.05442	-2.13028	-3.17985	-2.81017
	Solyc01g005720	0.41011	-0.808326	0.219683	-0.707921	0.803694	1.01609	0.97439	2.03496	2.40526	-0.0595111	0.370619	1.80487
	Solyc01g005730	1.66925	1.70578	2.15404	2.13636	2.58678	2.27359	2.98902	3.012	3.46379	1.84302	2.33224	3.15494
	Solyc01g005740	-2.54391	-3.14558	-4.16498	-4.16498	-2.63415	-4.16498	-4.16498	-4.16498	-1.72541	-3.28482	-3.6547	-3.35179
	Solyc01g005760	3.35615	3.11171	4.34501	3.99101	4.60158	4.68041	3.53966	4.16271	4.00247	3.60429	4.42433	3.90161
	Solyc01g005770	-1.53502	-1.54784	-3.2421	-4.16498	-4.16498	-1.83309	-2.09102	-2.21111	-0.864919	-2.10832	-3.38768	-1.72235
	Solyc01g005780	-4.16498	-4.16498	-4.16498	-2.59396	-4.16498	-4.16498	-4.16498	-3.19557	-2.48133	-4.16498	-3.6413	-3.28063
	Solyc01g005783	-4.16498	-4.16498	-4.16498	-4.16498	-4.16498	-4.16498	-4.16498	-4.16498	-3.09034	-4.16498	-4.16498	-3.80677
	Solyc01g005787	-3.13782	-4.16498	-4.16498	-4.16498	-4.16498	-4.16498	-4.16498	-4.16498	-4.16498	-3.82259	-4.16498	-4.16498
	Solyc01g005790	2.07795	2.13985	2.03602	2.00417	2.11162	2.03712	2.03997	2.18331	1.95571	2.0846	2.05097	2.05966
	Solyc01g005800	-1.79983	0.193579	-0.405554	-0.72459	-1.06769	-0.453047	-1.49806	-0.135651	-1.03679	-0.670602	-0.748443	-0.890168
	Solyc01g005810	6.34626	6.21671	6.48468	6.4297	6.70591	6.73087	6.52052	6.78716	6.8166	6.34922	6.62216	6.70809
	Solyc01g005820	6.93907	7.04709	6.77147	7.09821	6.79461	6.9983	7.27653	7.20208	7.07645	6.91921	6.96371	7.18502
	Solyc01g005830	4.34303	4.26576	4.01233	3.99901	4.00606	4.07143	4.19461	3.91309	3.68732	4.20704	4.0255	3.93167
	Solyc01g005840	3.93304	4.1542	4.11985	3.84244	4.13267	3.92957	4.23181	4.16138	4.08341	4.06903	3.96823	4.15887
	Solyc01g005850	-4.16498	-2.55421	-2.68379	-4.16498	-2.63415	-2.57171	-2.09102	-2.21111	-2.48133	-3.13433	-3.12361	-2.26115
	Solyc01g005870	1.37953	0.57253	1.92655	0.943946	2.33888	2.30676	2.32401	2.99277	2.76073	1.29287	1.8632	2.6925
	Solyc01g005880	-4.16498	-4.16498	-3.2421	-4.16498	-3.20539	-4.16498	-4.16498	-2.62095	-4.16498	-3.85735	-3.84511	-3.6503
	Solyc01g005900	0.278646	-0.428935	0.58889	0.399902	-0.0682867	-0.153308	0.387947	0.419555	-0.221944	0.1462	0.0594359	0.195186
	Solyc01g005910	4.19702	4.41648	4.22103	4.45081	4.52802	4.30276	4.0974	4.12465	4.36392	4.27818	4.4272	4.19532
	Solyc01g005920	2.61627	2.48788	2.53585	2.39924	2.27752	2.86974	2.78999	2.75095	2.97956	2.54666	2.5155	2.84017
	Solyc01g005930	3.5468	3.48807	3.89615	3.65965	4.17114	4.13283	4.05142	3.83411	3.98571	3.64367	3.98787	3.95708
	Solyc01g005950	6.05294	5.91235	6.03857	5.97289	5.96622	6.13781	6.16882	6.25708	6.17527	6.00129	6.02564	6.20039
	Solyc01g005960	6.15325	6.2637	6.08876	6.1073	5.9281	6.19744	6.07867	6.23265	6.232	6.16857	6.07762	6.18111
	Solyc01g005970	3.63007	3.99754	3.95309	3.9016	3.90309	3.94018	3.6836	3.75642	4.07288	3.86023	3.91495	3.83763
	Solyc01g005980	3.51794	3.60129	3.16921	4.39908	3.88263	3.6222	3.29857	3.34336	3.21811	3.42948	3.96797	3.28668
	Solyc01g005985	5.95892	5.8757	5.81886	5.60199	5.58602	5.68701	5.73364	6.15152	6.17157	5.88449	5.62501	6.01891
	Solyc01g006000	3.98669	3.74991	3.96236	3.88113	3.97732	4.18282	3.99316	4.22044	4.1248	3.89965	4.01376	4.1128
	Solyc01g006010	3.38041	3.11171	3.77507	3.32197	3.39739	3.6929	3.5617	3.48773	3.17936	3.42239	3.47075	3.40959
	Solyc01g006020	4.47742	4.60817	4.30259	4.79897	4.71611	4.18728	4.78124	4.57422	4.25164	4.46273	4.56745	4.5357
	Solyc01g006040	4.05859	4.35726	4.51923	4.35715	4.41146	4.32721	4.29008	4.44934	4.17983	4.31169	4.36527	4.30642
	Solyc01g006050	-4.16498	-4.16498	-3.2421	-1.59746	-4.16498	-4.16498	-2.51409	-4.16498	-2.48133	-3.85735	-3.30914	-3.05347
	Solyc01g006055	-4.16498	-3.14558	-1.71094	-1.8598	-3.20539	-2.15563	-2.51409	-3.19557	-2.48133	-3.00717	-2.40694	-2.73033
	Solyc01g006080	-4.16498	-1.54784	-4.16498	-3.17542	-3.20539	-4.16498	-4.16498	-4.16498	-3.09034	-3.2926	-3.51526	-3.80677
	Solyc01g006090	2.51767	2.42877	2.26313	1.79168	2.00208	2.41719	1.97578	2.38853	2.53374	2.40319	2.07032	2.29935
	Solyc01g006100	2.42744	2.15847	1.10658	2.29003	1.36947	1.97657	2.56122	2.00283	1.36964	1.8975	1.87869	1.9779
	Solyc01g006110	5.53426	5.56351	5.62126	5.56231	5.55404	5.50566	5.52354	5.66046	5.55918	5.57301	5.54067	5.58106
	Solyc01g006120	7.29466	7.27926	7.50881	7.42136	7.41759	7.26373	7.27354	7.25247	7.28896	7.36091	7.36756	7.27166
	Solyc01g006130	6.54774	6.63673	6.4927	6.76536	6.57963	6.69371	6.33328	6.2899	6.58904	6.55906	6.67956	6.40407
	Solyc01g006140	1.53202	1.73128	1.20362	1.90215	1.6128	1.91404	1.2158	1.50229	1.56309	1.48897	1.80966	1.42706
	Solyc01g006150	4.48862	4.56695	3.82167	4.45074	4.0976	3.89181	4.61558	4.36953	4.08341	4.29241	4.14672	4.35617
	Solyc01g006160	8.04232	8.16874	7.94965	8.19343	7.93533	8.23841	8.33345	8.5106	8.56435	8.05357	8.12239	8.46946
	Solyc01g006170	3.57509	3.78628	3.88644	4.08092	3.81944	3.97154	3.91276	3.94332	4.18473	3.74927	3.9573	4.0136
	Solyc01g006180	3.36428	3.46581	3.6371	3.67213	3.45389	3.43236	3.53225	3.48772	3.86879	3.48906	3.51946	3.62958
	Solyc01g006190	5.1299	5.26151	5.28817	5.20641	5.39174	5.48045	5.44444	5.47542	5.40879	5.22653	5.35953	5.44288
	Solyc01g006200	3.20837	2.99222	3.13681	3.11029	3.20473	3.21371	3.35021	3.58081	3.39767	3.11247	3.17625	3.4429
	Solyc01g006210	2.03785	2.4123	1.5861	1.74514	1.42712	1.84727	1.97578	1.52923	1.1467	2.01209	1.67318	1.55057
	Solyc01g006220	3.21044	2.71871	2.49808	2.99411	2.85169	2.74218	3.11208	3.12229	2.92196	2.80908	2.86266	3.05211
	Solyc01g006230	4.70503	4.79532	5.043	4.78852	4.91388	4.82186	4.88122	5.04006	4.86908	4.84778	4.84142	4.93012
	Solyc01g006240	1.64276	2.47307	1.67904	1.33808	0.613928	1.95581	0.883963	1.26643	1.40367	1.93162	1.30261	1.18469
	Solyc01g006250	1.17289	1.15798	1.46083	1.94364	1.63711	1.27344	1.0175	1.26643	1.29909	1.2639	1.61807	1.19434
	Solyc01g006260	1.44581	1.87303	1.48677	1.51491	1.36947	1.49108	1.60339	1.55568	2.04465	1.60187	1.45848	1.73457
	Solyc01g006280	7.25838	7.26542	7.2861	7.29924	7.1163	6.90951	7.35817	7.16972	7.153	7.26997	7.10835	7.22696
	Solyc01g006320	2.01737	2.04295	1.13966	1.94364	1.75436	1.09507	0.320628	1.26643	0.930349	1.73333	1.59769	0.839136
	Solyc01g006330	2.53217	2.26542	1.88814	3.69679	3.23733	3.315	1.35688	0.944853	0.142838	2.22858	3.41637	0.814858
	Solyc01g006340	2.53217	2.64139	3.2772	2.85861	2.69624	3.01731	2.92076	2.89257	2.82491	2.81692	2.85739	2.87941
	Solyc01g006350	6.1303	5.89588	6.45005	6.33551	6.30218	6.21989	6.26621	6.18709	6.1429	6.15874	6.28586	6.19873
	Solyc01g006360	4.80493	4.19085	4.961	4.66559	4.85843	4.17113	4.58982	4.26832	4.03539	4.65226	4.56505	4.29784
	Solyc01g006370	7.80193	7.4334	7.71625	8.00267	7.68403	7.64867	7.88493	7.56028	7.51001	7.65052	7.77846	7.65174
	Solyc01g006380	-1.31137	-1.54784	-1.9685	-2.18067	-2.22602	-0.831845	-3.11525	-3.19557	-3.09034	-1.60924	-1.74618	-3.13372
	Solyc01g006390	-1.53502	-4.16498	-0.226287	-3.17542	-1.64801	-3.15874	-2.51409	-4.16498	-4.16498	-1.97543	-2.66072	-3.61468
	Solyc01g006400	8.10001	7.91602	6.24558	7.69555	6.50881	6.56524	7.18862	6.20158	6.03216	7.42054	6.9232	6.47412
	Solyc01g006430	7.88956	7.70392	7.99617	7.78758	7.80568	7.88089	7.98894	8.01152	7.872	7.86322	7.82472	7.95748
	Solyc01g006440	-1.53502	0.515888	-0.405554	-0.277642	0.0791806	-0.246469	-2.09102	-1.21895	-0.329626	-0.474897	-0.14831	-1.2132
	Solyc01g006450	5.67524	5.8393	5.45303	5.77526	5.15683	5.40396	5.96616	5.60613	5.51772	5.65586	5.44535	5.69667
	Solyc01g006480	3.80152	3.6679	3.60192	3.63996	3.6959	3.69916	3.42415	3.92821	4.03539	3.69045	3.67834	3.79592
	Solyc01g006490	3.837	4.078	4.28788	4.10452	4.04793	3.92957	4.0566	3.9533	4.09907	4.06762	4.02734	4.03632
	Solyc01g006500	3.4736	3.43559	3.5289	3.45799	3.89289	3.47676	3.52479	3.77342	3.31962	3.47936	3.60921	3.53928
	Solyc01g006510	6.17773	6.16699	6.33109	6.31784	6.35948	6.05172	6.17058	5.99361	6.00702	6.22527	6.24301	6.05707
	Solyc01g006520	4.1366	4.28416	4.18468	4.37254	4.23709	4.29037	4.08223	4.05878	3.95162	4.20181	4.3	4.03088
	Solyc01g006540	8.32581	7.94711	7.24458	7.70321	6.22174	6.27812	4.68143	3.1914	3.49557	7.83916	6.73436	3.78946
	Solyc01g006550	-0.0268016	-0.128825	0.681651	0.768658	0.367013	1.51965	-1.05668	-0.0533951	0.578397	0.175342	0.885107	-0.177225
	Solyc01g006555	4.30654	3.48807	4.12811	5.50408	5.16256	5.01235	4.26477	3.24114	4.00247	3.97424	5.22633	3.83612
	Solyc01g006580	-1.79983	-2.13598	-1.30277	-4.16498	-3.20539	-1.15408	-1.2734	-2.62095	-3.09034	-1.7462	-2.84148	-2.32823
	Solyc01g006585	-4.16498	-4.16498	-4.16498	-4.16498	-3.20539	-4.16498	-4.16498	-3.19557	-4.16498	-4.16498	-3.84511	-3.84184
	Solyc01g006610	-4.16498	1.04242	2.01834	0.0630985	2.24583	-1.34695	-3.11525	1.52923	2.31877	-0.368072	0.32066	0.244249
	Solyc01g006620	-1.31137	-2.13598	0.0767005	-1.59746	0.00540131	-0.453047	-4.16498	-1.41047	-2.05442	-1.12355	-0.681703	-2.54329
	Solyc01g006630	4.88026	4.92333	4.76419	4.83647	4.95531	4.83718	4.82718	4.83399	4.92286	4.85593	4.87632	4.86134
	Solyc01g006650	0.641776	-0.128825	-0.066854	-1.01367	-0.654984	0.654379	-0.61637	-1.63137	-0.121745	0.148699	-0.338092	-0.789828
	Solyc01g006660	-2.12442	-3.14558	-2.68379	-4.16498	-2.63415	-1.56964	-4.16498	-1.41047	-2.05442	-2.65127	-2.78959	-2.54329
	Solyc01g006670	1.20945	1.00175	0.890399	1.02408	1.79871	0.976396	0.513837	0.819481	0.882894	1.03387	1.2664	0.738738
	Solyc01g006680	1.17289	1.60076	1.03806	0.768937	1.68516	1.57515	1.10012	1.26643	1.43691	1.27057	1.34308	1.26782
	Solyc01g006690	2.23327	1.96046	2.12189	2.56914	2.30853	2.81315	2.19838	1.96386	2.53374	2.10521	2.56361	2.23199
	Solyc01g006700	4.95495	5.02069	5.13019	5.05712	4.76163	4.65157	5.09253	4.82042	4.81321	5.03528	4.82344	4.90872
	Solyc01g006710	4.55422	4.37727	4.69911	4.5076	4.67208	4.91353	4.53991	4.58067	4.48009	4.54354	4.69774	4.53356
	Solyc01g006720	4.02309	3.60808	4.42034	4.03813	4.02478	4.23545	4.17568	4.22467	4.26559	4.01717	4.09945	4.22198
	Solyc01g006730	-2.12442	-2.55421	-1.49247	-2.18067	-4.16498	-0.346064	-1.76429	-3.19557	-2.05442	-2.05704	-2.23057	-2.33809
	Solyc01g006740	2.91081	2.88449	2.70008	3.14511	2.69624	2.84737	3.06143	2.90291	3.22764	2.83179	2.89624	3.06399
	Solyc01g006760	-4.16498	-4.16498	-2.28226	-4.16498	-4.16498	-4.16498	-2.09102	-4.16498	-4.16498	-3.53741	-4.16498	-3.47366
	Solyc01g006770	-1.79983	-0.808326	-1.13515	-2.59396	-1.23645	-3.15874	0.320628	-3.19557	-0.864919	-1.24777	-2.32972	-1.24662
	Solyc01g006780	-1.31137	-0.808326	-1.13515	-0.861902	-3.20539	-2.57171	-1.76429	-1.63137	-2.05442	-1.08495	-2.213	-1.81669
	Solyc01g006790	2.48821	2.51703	2.53585	3.02366	1.7086	1.80146	2.19838	1.35945	1.4694	2.5137	2.17791	1.67574
	Solyc01g006800	6.11779	6.00923	6.20247	6.06219	6.04409	6.07266	6.04415	6.0164	6.11365	6.10983	6.05965	6.05807
	Solyc01g006810	4.85741	4.73117	4.47166	4.62146	4.59225	4.63534	4.73351	4.44221	4.64206	4.68674	4.61635	4.60593
	Solyc01g006820	1.74592	1.04242	1.13966	1.5958	1.11265	1.33904	1.60339	1.90336	1.75947	1.30933	1.34917	1.75541
	Solyc01g006830	5.94401	6.09873	5.86437	6.119	5.97349	5.94962	6.08249	5.96924	5.8895	5.96904	6.01404	5.98041
	Solyc01g006840	-2.54391	-2.55421	-3.2421	-1.1833	-4.16498	-3.15874	-2.09102	-4.16498	-2.48133	-2.78007	-2.83567	-2.91244
	Solyc01g006850	0.745005	1.39629	0.143454	1.24082	0.709956	0.801263	1.25238	1.0602	0.833825	0.761582	0.917345	1.0488
	Solyc01g006860	3.92207	3.87903	3.78555	3.84205	3.90309	3.89727	3.88079	4.05878	4.17491	3.86222	3.8808	4.03816
	Solyc01g006870	6.67438	6.6516	6.73111	6.80559	6.94114	7.07207	6.90216	7.26594	7.16002	6.6857	6.9396	7.10938
	Solyc01g006880	5.3441	5.24636	5.70449	5.65883	5.69271	5.64835	5.37977	5.4615	5.19956	5.43165	5.66663	5.34694
	Solyc01g006890	4.01278	4.18177	4.08631	4.5623	4.137	4.49489	3.89823	4.0495	4.13496	4.09362	4.39806	4.02756
	Solyc01g006900	8.70182	8.80354	8.48308	8.72998	8.79326	8.53106	8.68583	8.6714	8.80721	8.66282	8.68477	8.72148
	Solyc01g006920	0.530588	0.515888	0.850996	1.06254	0.0791806	0.0167033	0.787537	0.0244231	0.221247	0.632491	0.386142	0.344402
	Solyc01g006930	3.01315	2.76805	2.62029	3.16292	3.46769	3.49846	3.11208	3.18294	3.06707	2.8005	3.37635	3.12069
	Solyc01g006940	5.76223	5.92744	5.77197	6.0465	5.84191	5.64441	5.73368	5.40261	5.446	5.82055	5.84427	5.52743
	Solyc01g006950	-1.79983	-2.55421	-4.16498	-1.37557	-3.20539	-3.15874	-2.51409	-2.21111	-4.16498	-2.83967	-2.5799	-2.96339
	Solyc01g006960	5.20165	4.81599	5.41124	5.34157	5.44663	5.37101	5.36767	5.32208	5.2542	5.14296	5.3864	5.31465
	Solyc01g006970	5.22192	5.19091	5.56686	5.20641	5.47936	5.37688	5.34207	5.38428	5.4213	5.32656	5.35422	5.38255
	Solyc01g006980	6.75585	6.88359	6.54692	6.82296	6.5229	6.48951	6.81379	6.61791	6.6627	6.72879	6.61179	6.69813
	Solyc01g006990	4.50342	4.5739	4.57473	4.52836	4.27711	4.11421	4.62259	4.5871	4.51398	4.55068	4.30656	4.57455
	Solyc01g007020	-4.16498	-4.16498	-4.16498	-2.59396	-4.16498	-4.16498	-3.11525	-3.19557	-4.16498	-4.16498	-3.6413	-3.49193
	Solyc01g007030	-0.5306	-4.16498	-4.16498	-2.18067	-4.16498	-4.16498	-3.11525	-2.62095	-4.16498	-2.95352	-3.50354	-3.30039
	Solyc01g007040	-1.53502	-3.14558	-4.16498	-4.16498	-4.16498	-4.16498	-4.16498	-4.16498	-4.16498	-2.94853	-4.16498	-4.16498
	Solyc01g007050	-2.54391	-4.16498	-4.16498	-4.16498	-4.16498	-4.16498	-4.16498	-4.16498	-4.16498	-3.62462	-4.16498	-4.16498
	Solyc01g007060	3.65015	3.30796	3.52264	3.28178	3.30039	3.53391	3.62585	3.65608	3.88091	3.49359	3.37203	3.72095
	Solyc01g007070	7.71573	7.44043	7.92812	7.5471	7.782	7.97964	7.72208	7.77813	7.71657	7.69476	7.76958	7.73893
	Solyc01g007080	-4.16498	-4.16498	-4.16498	-4.16498	-4.16498	-2.57171	-4.16498	-4.16498	-4.16498	-4.16498	-3.63389	-4.16498
	Solyc01g007100	5.00769	4.76222	5.02541	5.65025	5.62504	5.54789	5.05688	4.93569	4.82582	4.93177	5.60773	4.93946
	Solyc01g007110	5.31083	5.67764	5.6177	5.67911	5.61227	5.4877	5.68259	5.88042	5.89498	5.53539	5.59303	5.81933
	Solyc01g007120	4.87743	4.92061	5.12581	4.63747	4.86491	4.86146	4.75296	4.78452	4.82935	4.97461	4.78795	4.78894
	Solyc01g007130	5.03596	5.0174	5.33666	5.06912	5.35678	5.33529	5.10258	5.24097	5.25187	5.13001	5.25373	5.19847
	Solyc01g007140	2.86571	2.58744	3.06113	2.8148	2.92355	2.93484	2.92076	3.1914	3.20852	2.83809	2.89106	3.10689
	Solyc01g007150	6.99347	6.86649	7.06705	7.06562	6.99387	7.00418	7.02355	6.85737	6.98478	6.97567	7.02122	6.95523
	Solyc01g007160	0.208131	1.23018	0.143454	1.1	-0.654984	-0.153308	0.929862	0.0244231	-0.711361	0.527254	0.0972372	0.0809746
	Solyc01g007170	-0.307577	-1.54784	-0.313138	-0.599219	-2.22602	-0.831845	-1.49806	-1.41047	-0.221944	-0.72285	-1.21903	-1.04349
	Solyc01g007180	1.87927	1.75555	1.72335	1.81439	2.22972	2.16924	2.2354	2.41766	2.12842	1.78606	2.07112	2.2605
	Solyc01g007190	1.37953	1.04242	1.5619	1.54238	1.66134	0.705021	1.42257	1.23404	1.43691	1.32795	1.30291	1.36451
	Solyc01g007200	0.641776	1.08198	0.383295	0.622169	1.42712	0.934565	1.35688	1.09668	1.81109	0.70235	0.994618	1.42155
	Solyc01g007220	6.37765	5.71429	5.8836	6.03566	6.32674	5.86148	6.2479	6.65049	6.30807	5.99185	6.07463	6.40215
	Solyc01g007230	3.04835	3.14943	2.95363	2.85861	2.6606	2.53385	2.9982	3.04037	2.84981	3.05047	2.68435	2.96279
	Solyc01g007240	-4.16498	-4.16498	-3.2421	-2.59396	-4.16498	-3.15874	-4.16498	-4.16498	-3.09034	-3.85735	-3.30589	-3.80677
	Solyc01g007250	4.31713	4.40494	4.28287	4.28174	4.34985	4.45762	4.22719	4.43872	4.49452	4.33498	4.36307	4.38681
	Solyc01g007260	-0.947111	-0.960753	-0.6103	-0.72459	-0.540045	-0.568604	-1.2734	-1.0499	-0.711361	-0.839388	-0.61108	-1.01155
	Solyc01g007263	-4.16498	-2.13598	-4.16498	-4.16498	-4.16498	-4.16498	-3.11525	-3.19557	-4.16498	-3.48865	-4.16498	-3.49193
	Solyc01g007267	1.40276	1.08198	1.72335	1.3691	1.77671	1.20472	1.93134	1.41829	1.1467	1.4027	1.45017	1.49878
	Solyc01g007740	6.59962	6.6057	6.50147	6.76548	6.42552	6.3171	6.53935	6.32876	6.29909	6.56893	6.5027	6.38907
	Solyc01g007750	3.13643	3.09247	2.86739	3.07159	2.90338	2.8808	3.29857	2.72788	2.57911	3.0321	2.95192	2.86852
	Solyc01g007760	3.53244	3.59447	3.74314	3.52841	3.46769	3.51274	3.236	3.66826	3.85655	3.62335	3.50295	3.58694
	Solyc01g007770	2.53217	2.08249	2.00044	2.41419	2.21343	2.11409	2.2354	2.68059	2.10793	2.20504	2.24724	2.34131
	Solyc01g007780	-0.656533	-0.128825	-0.313138	-1.8598	0.400267	-1.34695	-3.11525	-0.761662	-1.23194	-0.366165	-0.935492	-1.70295
	Solyc01g007790	3.87732	3.73758	3.64288	3.77993	3.88263	3.41726	3.50218	3.66218	3.73487	3.75259	3.69327	3.63308
	Solyc01g007800	-0.414783	-0.32181	0.268353	-1.37557	-0.91662	0.654379	-0.9078	-0.898593	-3.09034	-0.15608	-0.545938	-1.63224
	Solyc01g007810	-3.13782	-3.14558	-4.16498	-4.16498	-2.63415	-4.16498	-3.11525	-2.21111	-4.16498	-3.48279	-3.6547	-3.16378
	Solyc01g007840	4.52191	4.66463	4.52228	4.39154	4.37896	4.06659	4.54729	4.62193	4.531	4.5696	4.27903	4.56674
	Solyc01g007850	2.93321	2.65457	3.23955	3.02366	3.039	3.11417	3.15135	2.98305	2.88636	2.94244	3.05894	3.00692
	Solyc01g007860	8.29518	8.47106	8.23671	8.17929	8.27223	8.26699	8.43419	8.60898	8.68427	8.33432	8.2395	8.57581
	Solyc01g007870	-0.0268016	0.331256	-0.724712	-0.277642	-0.154543	-0.694228	-1.07905	-0.222882	-0.572587	-0.140086	-0.375471	-0.624839
	Solyc01g007880	3.96011	3.9178	3.7269	4.14504	3.87229	4.07143	4.14682	3.80132	3.81923	3.86827	4.02959	3.92246
	Solyc01g007890	1.17289	1.65422	1.63332	1.51491	1.50949	1.09507	1.17826	1.29811	1.59251	1.48681	1.37315	1.35629
	Solyc01g007900	4.53617	4.58426	4.47122	4.61501	4.48119	4.39818	4.47946	4.72459	4.57647	4.53055	4.49813	4.59351
	Solyc01g007910	6.33566	6.67928	6.26243	6.27754	6.00696	6.22684	6.3506	6.37313	6.50593	6.42579	6.17044	6.40989
	Solyc01g007920	4.35222	4.67113	4.72386	4.569	4.52802	4.33125	4.67407	4.75914	4.81	4.5824	4.47609	4.74773
	Solyc01g007930	4.3563	4.35726	4.22376	4.22351	4.4043	4.47314	4.46784	4.43511	4.34653	4.31244	4.36699	4.41649
	Solyc01g007940	-3.13782	1.48749	1.10658	-0.483877	0.799989	-0.983986	0.974346	-1.21895	1.3348	-0.181249	-0.222625	0.363398
	Solyc01g007950	1.13538	0.395461	1.4075	1.24082	0.925307	1.49108	1.39013	0.775147	1.06401	0.979449	1.21907	1.07643
	Solyc01g007960	-4.16498	-4.16498	-4.16498	-4.16498	-4.16498	-3.15874	-4.16498	-4.16498	-4.16498	-4.16498	-3.82957	-4.16498
	Solyc01g007970	-4.16498	-4.16498	-4.16498	-3.17542	-2.63415	-4.16498	-4.16498	-4.16498	-4.16498	-4.16498	-3.32485	-4.16498
	Solyc01g007980	-4.16498	-3.14558	-3.2421	-1.59746	-2.63415	-1.15408	-3.11525	-3.19557	-2.48133	-3.51755	-1.79523	-2.93072
	Solyc01g007990	3.25485	3.24836	3.7645	3.72104	3.82482	3.6929	3.67385	3.92821	3.78091	3.42257	3.74625	3.79432
	Solyc01g008000	8.09354	8.17248	7.95613	8.02229	8.03755	7.96228	8.0762	8.18905	8.28865	8.07405	8.00737	8.18463
	Solyc01g008010	3.91847	3.78029	3.7914	3.99901	3.5672	3.96116	3.71375	3.80132	3.84422	3.83005	3.84246	3.78643
	Solyc01g008020	4.87458	4.84502	4.20826	4.68755	4.63892	4.25682	4.68749	4.56122	4.32893	4.64262	4.52776	4.52588
	Solyc01g008050	-1.53502	-1.81214	-1.30277	-1.8598	-3.20539	-4.16498	-4.16498	-1.89231	-2.48133	-1.54998	-3.07672	-2.84621
	Solyc01g008060	6.20622	6.19883	6.14924	5.97269	6.18374	6.32623	5.98666	6.26106	6.16042	6.18476	6.16089	6.13604
	Solyc01g008070	5.8269	5.82049	6.08179	5.89376	6.06712	5.84322	5.58375	5.5806	5.77489	5.90973	5.9347	5.64641
	Solyc01g008080	8.34721	8.51874	8.19569	8.27902	8.28386	8.44734	8.52805	9.00414	9.04722	8.35388	8.33674	8.8598
	Solyc01g008090	6.25344	6.48356	6.16517	6.30392	6.11736	6.23559	6.33923	6.75171	6.51576	6.30072	6.21896	6.53556
	Solyc01g008100	5.77756	5.92064	5.46125	5.83089	5.61581	5.54185	5.48728	5.4135	5.47829	5.71982	5.66285	5.45969
	Solyc01g008110	7.93434	8.02868	7.66867	8.27716	8.14138	8.01582	7.63323	7.43329	7.47794	7.87723	8.14479	7.51482
	Solyc01g008120	5.54699	5.18638	5.83041	5.60255	5.71458	5.71473	5.43652	5.5806	5.504	5.52126	5.67729	5.50704
	Solyc01g008130	2.28054	2.02276	2.91594	1.74514	2.89319	1.95581	2.56122	3.14859	2.89835	2.40641	2.19805	2.86939
	Solyc01g008140	4.31915	4.3653	4.57764	4.26945	4.26897	4.37881	3.98775	3.91295	4.20898	4.4207	4.30574	4.03656
	Solyc01g008160	5.00769	5.26796	5.23651	5.22136	4.97959	5.03232	5.09772	4.83408	5.0333	5.17072	5.07776	4.98837
	Solyc01g008170	4.97886	5.08294	5.19235	4.93061	5.21054	5.18507	5.06451	5.18478	5.1174	5.08472	5.10874	5.12223
	Solyc01g008180	3.59595	3.81004	3.54133	3.45802	3.48815	3.60896	3.36984	3.12229	3.23711	3.64911	3.51838	3.24308
	Solyc01g008190	2.34769	2.31606	2.21946	2.04796	2.22972	1.93475	2.3411	2.34369	2.00073	2.2944	2.07081	2.22851
	Solyc01g008200	2.13606	1.48749	1.82581	1.66617	1.73166	1.54767	1.65896	2.14897	2.3541	1.81645	1.6485	2.05401
	Solyc01g008220	0.641776	0.0413643	1.90747	-0.0148423	-0.334456	0.654379	-1.49806	-0.414965	-0.711361	0.863538	0.101694	-0.874797
	Solyc01g008230	6.72736	6.75122	6.65437	6.55142	6.75045	6.70632	6.79696	6.98307	7.06024	6.71098	6.6694	6.94675
	Solyc01g008240	-3.13782	-1.54784	0.636016	-3.17542	-0.0723553	0.0167033	-4.16498	-2.21111	0.0599202	-1.34988	-1.07702	-2.10539
	Solyc01g008250	6.1663	6.22859	5.93504	6.61167	6.44919	6.33931	5.87817	5.80252	6.01804	6.10998	6.46672	5.89958
	Solyc01g008260	3.837	3.81591	3.98277	3.65964	4.05709	4.00729	3.82724	4.22868	4.19933	3.87856	3.90801	4.08508
	Solyc01g008270	4.57872	4.67437	4.48737	4.4103	4.69052	4.54092	4.7781	4.93209	4.81321	4.58015	4.54725	4.84113
	Solyc01g008280	5.24412	5.43956	5.81375	5.49708	5.42675	5.44736	5.64179	5.55624	5.42958	5.49914	5.45706	5.54254
	Solyc01g008290	3.49591	3.53158	3.23955	3.46522	3.27706	3.29861	3.53869	3.54165	3.51904	3.42234	3.34696	3.53313
	Solyc01g008300	-0.794518	-0.222093	-0.504298	0.515312	-0.0723553	0.54743	0.572889	-0.0533951	0.295614	-0.50697	0.330129	0.271703
	Solyc01g008310	6.30877	6.12006	6.54996	6.37249	6.38529	6.372	6.52054	6.48057	6.30631	6.32626	6.37659	6.4358
	Solyc01g008320	4.78658	4.47337	4.99636	4.95365	5.12167	5.18507	4.92699	4.75058	4.74849	4.7521	5.0868	4.80869
	Solyc01g008330	7.74801	7.81386	7.6076	7.87138	7.63173	7.57708	7.84718	7.73609	7.74916	7.72316	7.6934	7.77748
	Solyc01g008340	4.38055	4.56346	4.34926	4.44347	4.41146	4.41349	4.49099	4.5903	4.63492	4.43109	4.42281	4.57207
	Solyc01g008360	6.18801	6.55055	5.88967	5.94078	5.91046	6.09183	6.08375	6.27007	6.36098	6.20941	5.98102	6.23827
	Solyc01g008370	7.45759	7.49821	7.43017	7.40179	7.61027	7.5826	7.59606	7.58624	7.72514	7.46199	7.53155	7.63581
	Solyc01g008390	-0.794518	-4.16498	-3.2421	-2.59396	-0.433591	-1.34695	-4.16498	-1.41047	-1.03679	-2.73387	-1.45817	-2.20408
	Solyc01g008400	-1.11777	-2.13598	-0.435546	-0.861902	0.341514	-0.246469	-1.76429	0.682169	0.783028	-1.22977	-0.255619	-0.0996973
	Solyc01g008410	-3.13782	-4.16498	-3.2421	-4.16498	-2.63415	-4.16498	-4.16498	-4.16498	-1.72541	-3.51496	-3.6547	-3.35179
	Solyc01g008420	0.793975	0.515888	0.902437	0.399902	1.94402	1.57515	1.28806	2.38853	2.31877	0.737433	1.30636	1.99845
	Solyc01g008425	-4.16498	-4.16498	-4.16498	-4.16498	-4.16498	-2.57171	-4.16498	-4.16498	-4.16498	-4.16498	-3.63389	-4.16498
	Solyc01g008440	4.25063	4.17264	4.33862	4.06678	4.28854	4.77818	4.45612	4.38436	4.41907	4.25397	4.37783	4.41985
	Solyc01g008450	-4.16498	-3.14558	-4.16498	-4.16498	-4.16498	-4.16498	-4.16498	-4.16498	-4.16498	-3.82518	-4.16498	-4.16498
	Solyc01g008460	3.72151	3.79821	4.06924	3.88556	3.73119	4.10009	3.7653	4.26129	4.02995	3.86298	3.90561	4.01884
	Solyc01g008470	4.04977	4.37727	3.93436	4.08559	3.71338	3.8132	4.25445	4.22457	3.99132	4.12047	3.87072	4.15678
	Solyc01g008480	3.58903	3.1862	3.74851	3.55563	3.64821	3.74223	3.39989	3.84487	3.55733	3.50791	3.64869	3.6007
	Solyc01g008490	3.41212	3.60808	3.5475	3.67222	3.75899	3.48403	3.35012	3.81781	3.60928	3.52257	3.63841	3.5924
	Solyc01g008500	-0.794518	-1.81214	-3.2421	-2.18067	-3.20539	-2.57171	-3.11525	-4.16498	-2.48133	-1.94959	-2.65259	-3.25385
	Solyc01g008510	-0.794518	-0.670476	1.43441	3.30603	3.71916	3.7054	-2.51409	-3.19557	-2.48133	-0.0101945	3.57686	-2.73033
	Solyc01g008520	1.56024	1.45772	1.172	1.17213	1.11265	1.46192	2.12135	1.35945	1.10595	1.39665	1.2489	1.52892
	Solyc01g008530	4.15546	3.9395	3.53513	2.76843	3.33091	3.57533	2.25357	2.60662	2.08714	3.8767	3.22489	2.31578
	Solyc01g008540	0.133991	-0.222093	-1.9685	-1.8598	-2.63415	-1.56964	1.63144	0.984334	0.882894	-0.685536	-2.02119	1.16622
	Solyc01g008550	6.83929	6.7558	6.36614	6.62384	6.43381	6.36697	6.86161	6.67634	6.59803	6.65375	6.47487	6.71199
	Solyc01g008560	4.31915	4.58082	4.30984	4.54882	4.38625	4.24831	4.1993	4.63129	4.48009	4.40327	4.39446	4.43689
	Solyc01g008600	4.95753	4.68404	4.33513	4.67829	4.21271	4.51278	5.25685	5.07001	5.15031	4.6589	4.46793	5.15906
	Solyc01g008620	-4.16498	-3.14558	-3.2421	-4.16498	-4.16498	-4.16498	-4.16498	-4.16498	-4.16498	-3.51755	-4.16498	-4.16498
	Solyc01g008650	-3.13782	-3.14558	-4.16498	-4.16498	-4.16498	-4.16498	-4.16498	-4.16498	-4.16498	-3.48279	-4.16498	-4.16498
	Solyc01g008660	2.22804	2.53139	2.10463	2.50077	2.48176	2.4912	2.6734	2.20017	2.54902	2.28802	2.49124	2.4742
	Solyc01g008670	-0.5306	-1.54784	-1.71094	-1.37557	-0.779879	-0.983986	-4.16498	-4.16498	-4.16498	-1.26313	-1.04648	-4.16498
	Solyc01g008680	-1.53502	-2.55421	-0.6103	-2.18067	-2.22602	-2.57171	-1.76429	-2.62095	-2.48133	-1.56651	-2.32613	-2.28886
	Solyc01g008690	-3.13782	-4.16498	-4.16498	-4.16498	-4.16498	-4.16498	-2.51409	-4.16498	-2.05442	-3.82259	-4.16498	-2.91116
	Solyc01g008700	3.75281	3.8564	3.6371	3.68452	3.63604	3.89181	3.7333	3.88193	4.02995	3.74877	3.73746	3.88173
	Solyc01g008720	-4.16498	-2.13598	-3.2421	-4.16498	-4.16498	-4.16498	-2.09102	-4.16498	-4.16498	-3.18102	-4.16498	-3.47366
	Solyc01g008730	3.81344	3.88463	3.95309	3.72704	3.898	4.02733	3.67385	4.05878	3.83801	3.88372	3.88412	3.85688
	Solyc01g008760	2.75876	2.80398	2.78616	1.67241	2.30853	2.40192	2.63235	2.7162	2.57911	2.78297	2.12762	2.64255
	Solyc01g008770	6.07502	5.96098	6.17029	6.07382	6.06486	6.1772	6.13119	6.03179	5.98049	6.06877	6.10529	6.04782
	Solyc01g008780	5.70257	5.58163	5.82135	5.80392	5.98313	5.99974	5.46407	5.48578	5.5846	5.70185	5.92893	5.51148
	Solyc01g008790	6.43269	6.7151	6.39786	6.65413	6.20632	6.01362	6.75068	6.50792	6.40469	6.51521	6.29136	6.55443
	Solyc01g008800	1.13538	0.119478	0.850996	1.24082	1.36947	1.89167	2.42362	2.43201	2.67973	0.701953	1.50065	2.51179
	Solyc01g008810	4.5071	4.71896	4.35279	4.215	4.52494	4.2461	4.45612	4.5481	4.61328	4.52628	4.32868	4.53917
	Solyc01g008820	5.1297	5.46969	5.05171	5.30213	5.22483	5.11207	5.03331	5.0212	5.03836	5.21704	5.21301	5.03096
	Solyc01g008830	2.19196	1.36456	2.13776	1.7686	1.84174	2.03712	1.73849	2.1315	1.5627	1.89809	1.88249	1.81089
	Solyc01g008840	5.66606	5.7237	5.67094	5.56897	5.77827	5.5003	5.45016	5.63743	5.69642	5.6869	5.61585	5.59467
	Solyc01g008850	6.03094	5.95434	6.10388	5.84959	6.04553	5.85448	5.97165	6.10526	6.23035	6.02972	5.91654	6.10242
	Solyc01g008860	-4.16498	-2.55421	-4.16498	-4.16498	-4.16498	-4.16498	-4.16498	-4.16498	-4.16498	-3.62806	-4.16498	-4.16498
	Solyc01g008880	-4.16498	-4.16498	-4.16498	-3.17542	-4.16498	-4.16498	-4.16498	-4.16498	-4.16498	-4.16498	-3.83513	-4.16498
	Solyc01g008890	3.83115	3.64156	3.73378	3.60857	3.70758	3.80161	3.61886	3.82869	3.7679	3.7355	3.70592	3.73849
	Solyc01g008900	2.78432	2.74359	2.73296	2.54218	2.4953	2.8808	2.53365	2.72788	2.7738	2.75363	2.63942	2.67844
	Solyc01g008910	1.56024	1.33212	1.26487	1.24082	1.36947	1.84727	0.883963	1.41829	2.06605	1.38574	1.48585	1.4561
	Solyc01g008920	3.84864	3.76214	4.43636	4.63109	4.36042	4.38665	3.80893	3.56136	3.72833	4.01571	4.45939	3.69954
	Solyc01g008930	4.70571	4.69684	4.55636	4.67885	4.44324	4.64851	4.49099	4.491	4.68073	4.65297	4.5902	4.55424
	Solyc01g008940	-3.13782	0.872365	0.268353	0.672769	0.456721	-1.15408	1.35688	-0.414965	0.366335	-0.665699	-0.00819751	0.436085
	Solyc01g008950	7.87206	8.03282	7.62598	7.80449	7.73097	7.86271	7.80625	8.06061	8.0543	7.84362	7.79939	7.97372
	Solyc01g008960	8.98812	8.82718	9.09461	8.90999	8.96866	8.93261	8.9239	8.82894	8.78999	8.96997	8.93709	8.84761
	Solyc01g008970	8.11411	8.09297	8.32155	8.13458	8.2042	8.16911	8.19668	8.13784	8.2202	8.17621	8.1693	8.18491
	Solyc01g008980	2.38011	2.4123	2.85749	2.41419	2.46809	2.9559	2.73933	2.88216	3.1294	2.54997	2.61273	2.91696
	Solyc01g008990	4.34402	4.6776	4.36984	4.32587	4.34945	4.45477	4.32914	4.46332	4.66679	4.46382	4.37669	4.48642
	Solyc01g009000	5.54878	5.43575	5.49039	5.36457	5.21673	5.25046	5.70916	5.69508	5.73368	5.49164	5.27725	5.71264
	Solyc01g009010	5.69453	5.63506	5.76536	5.8267	5.72756	5.51458	5.58196	5.51471	5.62431	5.69832	5.68961	5.57366
	Solyc01g009020	6.87646	7.07135	6.85834	6.73664	6.54469	7.0655	6.60421	6.96282	6.88525	6.93538	6.78228	6.81743
	Solyc01g009030	4.36855	4.38124	4.56552	4.47589	4.32319	4.29037	4.58055	4.47377	4.31559	4.43844	4.36315	4.45664
	Solyc01g009040	1.20945	0.730223	0.768807	-0.483877	-0.241697	-0.346064	-0.370245	0.168497	0.366335	0.902828	-0.357212	0.0548622
	Solyc01g009050	5.30873	5.36936	5.28227	5.49532	5.33578	5.16486	5.45233	5.26311	5.10708	5.32012	5.33199	5.27417
	Solyc01g009060	4.87281	4.85932	4.86655	4.70892	4.94548	4.87258	4.93826	4.78452	4.80068	4.86623	4.84233	4.84115
	Solyc01g009070	4.0076	4.03329	4.00478	3.71502	4.1921	4.58553	4.18518	4.45632	4.56898	4.01522	4.16422	4.40349
	Solyc01g009080	5.26203	5.52456	5.51266	5.80896	5.678	5.47185	5.31854	5.26912	5.27646	5.43308	5.65294	5.28804
	Solyc01g009090	6.41601	6.23664	6.5407	6.3375	6.41145	6.45769	6.36108	6.39068	6.31517	6.39778	6.40221	6.35564
	Solyc01g009100	6.76906	6.99824	6.62736	6.78885	6.40594	6.67401	6.94737	7.04636	7.05414	6.79822	6.62293	7.01596
	Solyc01g009120	3.52521	3.64156	3.69389	3.46522	3.62992	3.74828	3.50218	3.55482	3.59463	3.62022	3.61447	3.55054
	Solyc01g009145	2.01737	2.26542	2.37847	2.08112	2.00208	1.49108	2.12135	1.55568	1.6784	2.22042	1.85809	1.78514
	Solyc01g009160	4.1787	3.5387	0.810487	2.11811	1.63711	0.37049	2.53226	3.17443	0.976293	2.84263	1.37524	2.22766
	Solyc01g009170	5.6201	5.57047	5.57906	5.52997	5.71629	5.96497	4.94374	5.31629	5.36196	5.58988	5.73708	5.20733
	Solyc01g009180	5.33585	5.22222	5.51903	5.23405	5.25317	5.11657	5.13081	4.91284	5.17316	5.35904	5.20126	5.07227
	Solyc01g009190	-4.16498	-4.16498	-3.2421	-4.16498	-4.16498	-4.16498	-4.16498	-4.16498	-3.09034	-3.85735	-4.16498	-3.80677
	Solyc01g009200	0.345875	0.67955	0.810487	0.721654	0.511049	0.654379	-0.166607	0.476042	-0.0280548	0.61197	0.629028	0.0937933
	Solyc01g009220	-1.79983	-0.222093	-0.724712	-1.8598	-0.91662	-0.983986	-1.76429	-2.21111	-2.05442	-0.915545	-1.25347	-2.00994
	Solyc01g009230	3.71516	3.58073	3.93436	3.94342	4.08869	4.03765	3.85129	3.68676	3.82552	3.74342	4.02325	3.78785
	Solyc01g009240	-2.54391	-3.14558	-1.71094	-2.59396	-1.4276	-4.16498	-3.11525	-2.21111	-3.09034	-2.46681	-2.72885	-2.80557
	Solyc01g009245	3.68302	3.94497	3.57327	3.65964	3.36818	3.62877	3.43214	3.23329	3.60198	3.73376	3.5522	3.42247
	Solyc01g009250	-0.0268016	0.119478	-0.313138	-0.861902	-0.334456	-0.453047	-0.490119	-0.414965	-0.711361	-0.0734872	-0.549802	-0.538815
	Solyc01g009270	-2.12442	-4.16498	-4.16498	-4.16498	-4.16498	-4.16498	-4.16498	-4.16498	-4.16498	-3.48479	-4.16498	-4.16498
	Solyc01g009280	5.37862	5.27651	5.53989	5.40717	5.57874	5.72397	5.70585	5.59662	5.64757	5.39834	5.56996	5.65001
	Solyc01g009290	4.51076	4.54942	4.57831	4.40669	4.36842	4.53043	4.36695	4.51647	4.48009	4.54616	4.43518	4.4545
	Solyc01g009300	5.53264	5.40488	5.45305	5.45252	5.3897	5.41729	5.82602	5.66654	5.70188	5.46352	5.41984	5.73148
	Solyc01g009310	7.50657	7.80559	7.56626	7.61225	7.54335	7.15807	7.52295	7.42335	7.43693	7.62614	7.43789	7.46108
	Solyc01g009340	0.133991	-0.960753	-1.49247	-0.72459	-1.06769	-0.0657994	-1.07905	-0.761662	0.142838	-0.773077	-0.61936	-0.565957
	Solyc01g009350	-4.16498	-4.16498	-4.16498	-4.16498	-4.16498	-3.15874	-4.16498	-4.16498	-4.16498	-4.16498	-3.82957	-4.16498
	Solyc01g009370	-4.16498	-4.16498	-1.71094	-4.16498	-2.63415	-4.16498	-4.16498	-4.16498	-4.16498	-3.34697	-3.6547	-4.16498
	Solyc01g009380	3.81344	3.91233	4.00786	4.10415	4.06619	4.15121	3.99856	3.66826	3.8504	3.91121	4.10718	3.83907
	Solyc01g009390	2.89926	3.02303	3.32831	3.00403	3.10232	2.91346	3.06258	3.10448	2.95681	3.08353	3.0066	3.04129
	Solyc01g009420	8.36556	8.56921	8.44518	8.52449	8.6401	8.45414	8.74025	8.68623	8.51593	8.45998	8.53958	8.64747
	Solyc01g009430	5.30028	5.18183	5.87009	4.73594	5.92528	6.04443	5.72769	5.98268	6.27629	5.45073	5.56855	5.99555
	Solyc01g009443	5.81657	5.90969	5.95104	5.97523	5.88754	6.08227	6.04921	6.20728	6.24261	5.89243	5.98168	6.16637
	Solyc01g009447	4.78658	5.1589	4.49058	4.5623	4.59618	4.68664	5.02804	4.89223	4.94035	4.81202	4.61504	4.95354
	Solyc01g009470	-3.13782	-3.14558	-3.2421	-4.16498	-3.20539	-3.15874	-4.16498	-1.63137	-3.09034	-3.17517	-3.5097	-2.96223
	Solyc01g009480	-4.16498	-4.16498	-4.16498	-4.16498	-3.20539	-4.16498	-3.11525	-4.16498	-4.16498	-4.16498	-3.84511	-3.81507
	Solyc01g009500	3.21044	3.04311	3.26226	2.72163	3.20473	3.33121	2.65985	2.77367	2.97955	3.17194	3.08586	2.80435
	Solyc01g009510	-3.13782	-0.32181	-0.724712	-2.59396	-1.06769	-2.57171	-1.2734	-0.898593	0.0599202	-1.39478	-2.07779	-0.704023
	Solyc01g009520	7.87992	8.11006	7.51173	7.84013	7.6296	7.76975	7.95553	8.05656	8.15661	7.8339	7.74649	8.05623
	Solyc01g009565	-0.794518	-1.32453	-1.49247	-1.01367	-0.334456	-0.153308	-1.49806	-1.21895	-0.864919	-1.20384	-0.500478	-1.19398
	Solyc01g009600	-4.16498	-4.16498	-2.68379	-4.16498	-4.16498	-4.16498	-4.16498	-4.16498	-4.16498	-3.67125	-4.16498	-4.16498
	Solyc01g009610	4.98767	5.06875	4.80618	4.93321	4.81761	5.06661	5.14698	5.2751	5.14534	4.9542	4.93914	5.18914
	Solyc01g009620	4.53295	4.68082	4.70475	4.79138	4.6112	4.48768	4.76866	4.71582	4.76822	4.63951	4.63009	4.7509
	Solyc01g009630	4.74362	4.85362	4.96671	4.96892	4.99159	5.093	4.84551	4.83669	4.97188	4.85465	5.01783	4.88469
	Solyc01g009660	-4.16498	-4.16498	-4.16498	-4.16498	-3.20539	-4.16498	-4.16498	-4.16498	-4.16498	-4.16498	-3.84511	-4.16498
	Solyc01g009670	1.37953	1.62774	1.23457	2.29003	1.66134	2.15109	1.35688	0.633332	1.22491	1.41395	2.03415	1.07171
	Solyc01g009690	-2.54391	-3.14558	-4.16498	-1.8598	-2.63415	-4.16498	-4.16498	-3.19557	-3.05442	-3.28482	-2.88631	-3.47166
	Solyc01g009700	-4.16498	-4.16498	-4.16498	-3.17542	-1.90826	-1.83309	-2.09102	-1.41047	-0.620612	-4.16498	-2.30559	-1.37403
	Solyc01g009710	-3.13782	-4.16498	-4.16498	-4.16498	-4.16498	-4.16498	-4.16498	-4.16498	-4.16498	-3.82259	-4.16498	-4.16498
	Solyc01g009720	-1.31137	-3.14558	-0.984982	-3.17542	-0.433591	-1.83309	-3.11525	-3.19557	-2.48133	-1.81398	-1.81403	-2.93072
	Solyc01g009735	-4.16498	-3.14558	-4.16498	-4.16498	-4.16498	-4.16498	-4.16498	-4.16498	-4.16498	-3.82518	-4.16498	-4.16498
	Solyc01g009740	-4.16498	-4.16498	-4.16498	-4.16498	-4.16498	-4.16498	-4.16498	-3.19557	-4.16498	-4.16498	-4.16498	-3.84184
	Solyc01g009750	6.68744	6.73537	6.83135	6.70282	6.94793	6.94506	6.89986	7.26161	7.26851	6.75139	6.86527	7.14333
	Solyc01g009760	1.0573	1.15798	2.23279	1.10296	0.925307	2.23964	0.684201	0.5304	0.43375	1.48269	1.42263	0.54945
	Solyc01g009770	1.77059	1.45772	0.489752	0.569729	1.21439	0.753944	1.32288	2.1315	1.6784	1.23936	0.846021	1.71093
	Solyc01g009780	4.69411	4.84824	4.72386	4.75074	4.80848	4.42486	4.77224	4.9705	4.84761	4.75541	4.66136	4.86345
	Solyc01g009810	-4.16498	-4.16498	-4.16498	-4.16498	-4.16498	-3.15874	-4.16498	-4.16498	-4.16498	-4.16498	-3.82957	-4.16498
	Solyc01g009820	3.83115	3.89577	4.13633	4.01266	4.07072	4.17386	3.74635	4.10876	4.10425	3.95442	4.08575	3.98645
	Solyc01g009830	0.0694226	-1.35781	-0.155722	-1.16701	-0.317502	-2.06629	0.53846	1.36745	0.12769	-0.481369	-1.1836	0.677866
	Solyc01g009850	4.58569	4.81011	4.43837	4.74484	4.51811	4.62552	4.5908	4.96311	5.02749	4.61139	4.62949	4.86046
	Solyc01g009860	3.78949	3.78029	3.88156	3.90689	4.55089	4.20049	3.39171	3.63143	4.09387	3.81711	4.21942	3.70567
	Solyc01g009870	3.73411	3.87903	3.5351	4.32587	3.8124	3.27366	4.62956	4.62506	4.36392	3.71608	3.80398	4.53951
	Solyc01g009920	-4.16498	-4.16498	-4.16498	-4.16498	-4.16498	-3.15874	-4.16498	-4.16498	-4.16498	-4.16498	-3.82957	-4.16498
	Solyc01g009970	5.01804	4.96039	4.82581	4.8234	4.77834	4.83047	4.80298	4.6344	4.67726	4.93475	4.81074	4.70488
	Solyc01g009990	7.86715	8.00173	7.50463	8.00277	7.7047	7.5479	7.69307	7.45713	7.43898	7.79117	7.75179	7.52973
	Solyc01g010000	3.70239	3.5387	3.50371	3.32197	3.3608	3.32313	3.4481	3.27337	3.39766	3.5816	3.3353	3.37304
	Solyc01g010020	2.24575	1.48749	1.10658	1.81439	1.53593	1.84727	1.9975	2.50169	1.83622	1.61327	1.73253	2.1118
	Solyc01g010030	2.81915	2.47307	2.64355	2.74497	2.74239	3.06655	2.70014	2.43201	2.5183	2.64526	2.8513	2.55015
	Solyc01g010050	5.44337	5.15202	5.44649	5.30794	5.4691	5.51988	5.64524	5.64219	5.57291	5.34729	5.43231	5.62011
	Solyc01g010060	0.0558336	0.627032	-1.71094	1.1	0.511049	0.239194	-0.374032	0.419555	-1.72541	-0.342692	0.616749	-0.559964
	Solyc01g010065	-3.13782	-2.55421	-3.24074	-2.59396	-4.16498	-4.16498	-3.11525	-4.16498	-3.09034	-2.97759	-3.6413	-3.45686
	Solyc01g010067	-4.16498	-3.14558	-2.28226	-4.16498	-2.22602	-3.15874	-3.11525	-2.21111	-3.09034	-3.19761	-3.18325	-2.80557
	Solyc01g010080	-2.54391	-1.32453	-1.9685	-2.59396	-3.20539	-4.16498	-3.11525	-4.16498	-3.09034	-1.94565	-3.32144	-3.45686
	Solyc01g010130	3.24608	3.15871	2.99932	3.04302	3.31573	3.32313	2.73933	3.0682	3.04568	3.1347	3.22729	2.95107
	Solyc01g010150	0.471606	0.119478	0.143454	-0.377078	0.00540131	-0.246469	-0.374032	0.235475	-0.221944	0.244846	-0.206048	-0.120167
	Solyc01g010180	5.78212	6.15254	5.14426	5.84888	5.46211	5.06661	5.46826	5.40988	5.26905	5.69297	5.4592	5.3824
	Solyc01g010185	7.44628	7.95755	7.58787	7.34727	7.497	7.81551	7.51916	7.77803	8.11175	7.6639	7.55326	7.80298
	Solyc01g010215	5.40149	5.7789	5.17251	5.24473	5.1019	5.35524	5.12495	5.20998	5.41088	5.45097	5.23396	5.2486
	Solyc01g010220	3.27223	3.21317	3.56006	3.41408	3.0755	3.30683	2.75216	3.21648	3.62379	3.34849	3.26547	3.19748
	Solyc01g010230	3.81344	4.14489	4.19555	3.35333	3.80321	4.32317	3.21762	3.59363	3.80019	4.0513	3.82657	3.53715
	Solyc01g010250	0.887195	0.456931	1.00254	-0.0148423	0.280266	0.654379	-0.374032	0.862494	0.559808	0.78222	0.306601	0.349423
	Solyc01g010270	6.89674	7.08238	6.70162	6.8348	6.70316	6.77307	7.10146	7.07527	7.1708	6.89358	6.77035	7.11584
	Solyc01g010290	3.94934	3.86209	3.79077	3.9987	3.6959	3.6929	4.22254	3.97796	3.96877	3.8674	3.79583	4.05642
	Solyc01g010310	5.55767	5.69688	5.25972	5.38954	5.2228	5.27371	5.75289	5.61091	5.6879	5.50476	5.29535	5.6839
	Solyc01g010350	-0.947111	-1.32453	-0.6103	-0.599219	-0.779879	-0.153308	-0.754739	-0.636608	-0.864919	-0.960648	-0.510802	-0.752088
	Solyc01g010360	1.20945	2.47307	1.65636	1.81439	2.11162	2.29027	1.73849	2.41766	2.4548	1.77963	2.07209	2.20365
	Solyc01g010365	-4.16498	-4.16498	-4.16498	-4.16498	-4.16498	-3.15874	-4.16498	-4.16498	-4.16498	-4.16498	-3.82957	-4.16498
	Solyc01g010370	3.41994	2.99222	3.20097	3.28991	3.02038	3.5956	3.24511	3.3281	3.47171	3.20438	3.30196	3.34831
	Solyc01g010390	2.95454	3.33277	2.03602	1.98428	3.34593	2.58882	2.42362	1.0602	2.97955	2.77444	2.63968	2.15445
	Solyc01g010405	-1.48696	-0.625817	-0.444539	0.00140313	-0.375759	-0.813337	-0.879656	-0.293745	-0.454263	-0.85244	-0.395898	-0.542555
	Solyc01g010410	1.31388	0.515888	0.326968	1.20688	1.39858	0.934565	1.25238	1.20091	0.67573	0.718913	1.18001	1.04301
	Solyc01g010430	2.81915	3.34907	2.15404	3.18923	3.0482	2.69285	1.9086	2.64591	2.6231	2.77409	2.97676	2.39254
	Solyc01g010440	6.53463	6.20444	6.42064	6.3183	6.65204	6.27896	6.31109	6.50172	6.47794	6.38657	6.41643	6.43025
	Solyc01g010460	1.37953	1.68023	1.78737	1.51393	1.36947	1.6286	1.60339	2.04078	1.73295	1.61571	1.504	1.79237
	Solyc01g010470	1.20945	0.193579	0.890399	1.45834	0.400267	1.01705	1.35688	1.58166	1.29909	0.764477	0.958551	1.41254
	Solyc01g010480	4.83418	4.69365	4.8591	4.82533	5.21464	5.06661	5.22038	5.18478	5.32471	4.79565	5.03553	5.24329
	Solyc01g010490	-0.114459	0.779176	0.383295	1.3691	0.280266	0.753944	1.13972	0.235475	1.43691	0.349337	0.801103	0.937366
	Solyc01g010510	1.01662	0.872365	1.65636	1.02408	1.50949	1.54767	1.2158	1.26643	1.1467	1.18178	1.36041	1.20964
	Solyc01g010520	4.64027	4.47708	4.38418	4.42883	4.12398	4.39047	4.58004	4.491	4.60963	4.50051	4.31443	4.56023
	Solyc01g010540	6.78768	7.00334	6.62791	6.85588	6.69731	6.71642	6.90575	7.02565	7.04367	6.80631	6.75653	6.99169
	Solyc01g010570	4.88592	4.78636	4.83911	4.65331	5.21259	5.08107	4.82777	5.22653	5.27959	4.83713	4.98232	5.1113
	Solyc01g010580	8.71106	8.719	8.68681	8.73973	8.8841	8.78897	8.84651	9.10266	9.11348	8.70563	8.80427	9.02088
	Solyc01g010590	4.64028	4.86783	4.49058	4.41396	4.53787	4.61562	4.70409	4.69812	4.43718	4.66623	4.52248	4.61313
	Solyc01g010600	-4.16498	-4.16498	-4.16498	-4.16498	-4.16498	-4.16498	-3.11525	-4.16498	-4.16498	-4.16498	-4.16498	-3.81507
	Solyc01g010640	4.62682	4.55294	4.75087	4.7712	4.92159	4.55134	4.29085	4.67115	4.55391	4.64354	4.74804	4.5053
	Solyc01g010650	6.45204	6.25664	6.33027	6.0768	6.50551	6.26952	6.44465	6.57733	6.53546	6.34632	6.28394	6.51915
	Solyc01g010660	4.04853	4.27432	4.06924	4.5076	4.31169	4.13745	4.69082	4.79289	4.29307	4.1307	4.31891	4.59226
	Solyc01g010700	5.41038	4.97677	5.28955	5.06202	5.29619	5.18952	5.14278	5.03772	4.68766	5.22557	5.18258	4.95605
	Solyc01g010710	-0.0268016	0.331256	0.489752	0.622169	-0.241697	-0.694228	0.929862	0.582784	0.618933	0.264735	-0.104585	0.710526
	Solyc01g010740	-4.16498	-4.16498	-4.16498	-3.17542	-4.16498	-4.16498	-4.16498	-4.16498	-3.09034	-4.16498	-3.83513	-3.80677
	Solyc01g010750	8.72644	8.63825	8.74074	8.54358	8.58761	8.34751	8.78371	8.62789	8.68256	8.70181	8.4929	8.69805
	Solyc01g010755	0.347319	0.404725	-0.963607	0.56604	-0.306842	-0.927966	-4.16498	-1.21823	-3.09034	-0.0705207	-0.222923	-2.82452
	Solyc01g010760	6.51087	6.48548	6.51571	6.19246	6.25003	6.21732	6.15915	6.07358	6.14542	6.50402	6.21994	6.12605
	Solyc01g010780	5.25945	5.50286	5.43382	5.32852	5.29231	5.45108	5.41248	5.50287	5.31357	5.39871	5.3573	5.40964
	Solyc01g010810	3.70879	4.01808	3.81144	3.91741	3.70758	3.80161	3.78549	3.89234	3.89294	3.8461	3.80887	3.85692
	Solyc01g010820	5.40446	5.33907	5.63369	5.38394	5.45877	5.4211	5.29487	5.26712	5.28647	5.45907	5.42127	5.28282
	Solyc01g010830	4.58916	4.89029	4.52229	4.68611	4.3895	4.66442	4.61623	4.56122	4.53868	4.66725	4.58001	4.57204
	Solyc01g010860	4.04853	3.99236	3.91538	3.95829	4.24147	3.91888	4.10742	4.15707	4.11969	3.98542	4.03955	4.12806
	Solyc01g010870	5.43387	5.43192	5.79032	5.27791	5.39339	5.43804	5.3386	5.54803	5.61566	5.55204	5.36978	5.50076
	Solyc01g010880	2.61627	2.88449	2.15404	2.67222	2.53517	2.09523	2.3075	2.82893	2.56415	2.5516	2.43421	2.56686
	Solyc01g010920	-0.114459	0.193579	0.636016	0.508976	0.842983	1.09507	0.836555	0.984334	1.26247	0.238379	0.815676	1.02779
	Solyc01g010930	0.587253	0.515888	-0.144369	0.145238	0.563405	-0.568604	0.572889	1.32911	0.67573	0.31959	0.0466798	0.859242
	Solyc01g010940	4.23885	4.48079	3.80114	4.17607	4.19082	3.97154	4.25895	4.19542	4.16006	4.17359	4.11281	4.20481
	Solyc01g010950	4.16945	4.0731	4.11153	4.16727	4.23306	3.74223	4.17568	4.2652	3.9969	4.11803	4.04752	4.14593
	Solyc01g010970	-1.31137	-1.81214	-0.848986	-1.59746	-1.64801	-0.246469	-2.09102	-3.19557	-1.72541	-1.32416	-1.16398	-2.33733
	Solyc01g010990	4.11749	4.01808	3.83688	4.16727	4.06619	4.33532	4.00929	4.22457	4.14001	3.99082	4.18959	4.12462
	Solyc01g011000	7.43862	7.48756	7.49662	7.34203	7.41759	7.38776	7.44357	7.56354	7.64947	7.47426	7.38246	7.55219
	Solyc01g011030	3.97612	3.9395	4.04109	4.14948	4.23706	3.90812	4.35882	4.38436	4.3245	3.98557	4.09822	4.35589
	Solyc01g011040	6.52996	6.57073	6.48228	6.65091	6.52268	6.40141	6.54336	6.55784	6.62079	6.52766	6.525	6.574
	Solyc01g011050	-2.12442	-2.55421	1.63332	-4.16498	0.14937	-0.0657994	-4.16498	-2.21111	0.498155	-1.01511	-1.36047	-1.95931
	Solyc01g011080	-2.54391	-4.16498	-4.16498	-1.8598	-3.20539	-1.83309	-1.76429	-1.89231	-2.48133	-3.62462	-2.29942	-2.04598
	Solyc01g011090	2.99243	2.53139	3.01574	2.95133	2.56683	2.55407	2.59985	2.7704	2.33649	2.84652	2.69074	2.56891
	Solyc01g011100	5.35114	5.20888	5.45826	5.39762	5.5751	5.27066	5.45883	5.31298	5.25885	5.33943	5.41446	5.34355
	Solyc01g011105	-1.31137	-0.128825	-0.405554	-0.483877	-0.241697	0.753944	-0.374032	-0.315729	0.221247	-0.615248	0.00945698	-0.156171
	Solyc01g011180	-3.13782	-4.16498	-4.16498	-4.16498	-4.16498	-4.16498	-4.16498	-4.16498	-4.16498	-3.82259	-4.16498	-4.16498
	Solyc01g011200	0.530588	-0.670476	-0.405554	-0.483877	0.563405	0.239194	0.513837	0.712767	-0.121745	-0.181814	0.106241	0.368286
	Solyc01g011220	0.278646	-0.128825	0.00670807	0.207383	-0.154543	-0.831845	-0.754739	0.439919	-0.711361	0.0521764	-0.259668	-0.34206
	Solyc01g011230	-4.16498	-3.14558	-3.2421	-1.8598	-1.90826	-3.15874	-3.11525	-2.62095	-1.23194	-3.51755	-2.30893	-2.32271
	Solyc01g011273	-1.79983	-0.544656	-3.2421	-3.17542	0.280266	-2.15563	-0.61637	-3.19557	0.43375	-1.8622	-1.6836	-1.12606
	Solyc01g011277	-3.13782	-4.16498	-4.16498	-4.16498	-4.16498	-4.16498	-3.11525	-3.19557	-4.16498	-3.82259	-4.16498	-3.49193
	Solyc01g011340	6.39363	6.45661	6.43065	6.42566	6.36101	6.4686	6.50887	6.4743	6.55608	6.42696	6.41842	6.51308
	Solyc01g011350	8.36243	8.2175	8.00644	8.12336	7.92212	7.89022	8.36769	8.19945	8.14275	8.19546	7.97857	8.23663
	Solyc01g011352	-4.16498	-4.16498	-4.16498	-4.16498	-4.16498	-4.16498	-4.16498	-4.16498	-3.09034	-4.16498	-4.16498	-3.80677
	Solyc01g011390	-4.16498	-4.16498	-4.16498	-4.16498	-2.63415	-3.15874	-4.16498	-4.16498	-4.16498	-4.16498	-3.31929	-4.16498
	Solyc01g011413	-4.16498	-3.14558	-3.2421	-4.16498	-4.16498	-4.16498	-4.16498	-4.16498	-4.16498	-3.51755	-4.16498	-4.16498
	Solyc01g011430	-1.31137	-1.32453	-1.71094	-1.8598	-1.06769	-1.15408	-4.16498	-1.63137	-2.05442	-1.44895	-1.36052	-2.61692
	Solyc01g011495	-4.16498	-3.14558	-2.28226	-3.17542	-4.16498	-3.15874	-3.11525	-3.19557	-2.48133	-3.19761	-3.49971	-2.93072
	Solyc01g011510	5.17138	5.33702	5.22354	5.31374	5.16891	5.04466	5.75195	5.7216	5.66675	5.24398	5.17577	5.71343
	Solyc01g013883	-4.16498	-4.16498	-3.2421	-4.16498	-3.20539	-4.16498	-4.16498	-4.16498	-4.16498	-3.85735	-3.84511	-4.16498
	Solyc01g013890	-4.16498	-3.14558	-4.16498	-4.16498	-4.16498	-4.16498	-3.17075	-1.89231	-2.48133	-3.82518	-4.16498	-2.5148
	Solyc01g013995	-4.16498	-3.14558	-1.13515	-1.8598	-0.91662	-2.15563	-0.073102	-1.63137	0.142838	-2.81524	-1.64402	-0.520545
	Solyc01g014100	1.37953	1.26497	-0.724712	0.458761	0.280266	-0.0657994	0.0147099	0.360767	-0.221944	0.639926	0.224409	0.0511773
	Solyc01g014105	3.59379	2.93449	3.97986	2.85049	3.51215	3.79788	3.62125	3.798	4.04407	3.50271	3.38684	3.82111
	Solyc01g014140	-2.54391	-3.14558	-2.28226	-3.17542	-4.16498	-1.83309	-4.16498	-3.19557	-2.48133	-2.65725	-3.05783	-3.28063
	Solyc01g014160	-4.16498	-4.16498	-3.2421	-4.16498	-4.16498	-4.16498	-4.16498	-3.19557	-4.16498	-3.85735	-4.16498	-3.84184
	Solyc01g014180	8.17075	8.10175	8.29986	8.0429	8.42277	8.34994	8.22738	8.51222	8.55804	8.19079	8.27187	8.43255
	Solyc01g014230	3.95474	4.0731	3.85776	4.16285	3.99172	4.00224	4.00929	3.80684	3.98009	3.96186	4.05227	3.93207
	Solyc01g014250	2.98649	2.3967	3.71598	3.31402	3.63604	3.40964	2.9982	3.56787	3.1192	3.03306	3.45324	3.22842
	Solyc01g014270	3.87732	4.08774	4.12399	3.93308	3.70175	4.01233	3.79666	4.24503	4.19933	4.02968	3.88239	4.08034
	Solyc01g014320	-2.54391	-2.55421	-2.68379	1.51491	1.53593	1.51965	-4.16498	-4.16498	-1.23194	-2.59397	1.5235	-3.1873
	Solyc01g014363	-2.12442	-4.16498	-2.28226	-4.16498	-3.20539	-2.57171	-2.51409	-1.89231	-3.09034	-2.85722	-3.31402	-2.49891
	Solyc01g014373	3.63889	3.15362	3.77608	3.36677	3.85082	3.73397	4.15211	3.95345	4.33068	3.52286	3.65052	4.14541
	Solyc01g014390	-4.16498	-4.16498	-2.68379	-4.16498	-4.16498	-4.16498	-4.16498	-4.16498	-4.16498	-3.67125	-4.16498	-4.16498
	Solyc01g014470	-3.13782	-4.16498	-4.16498	-4.16498	-2.63415	-4.16498	-4.16498	-2.21111	-4.16498	-3.82259	-3.6547	-3.51369
	Solyc01g014480	3.66887	3.91233	4.20044	4.14504	4.12833	4.18282	4.1993	4.3125	4.08865	3.92721	4.15207	4.20015
	Solyc01g014490	4.49234	4.25714	4.30256	4.43617	4.44324	4.45846	4.23173	4.3125	4.21857	4.35068	4.44596	4.25427
	Solyc01g014530	1.93283	-2.13562	-0.6103	-0.184621	-1.06769	-0.694228	-0.61637	-0.0533951	-0.711361	-0.271029	-0.648847	-0.460376
	Solyc01g014560	0.887195	-0.22219	-0.226287	-1.01367	-0.334456	-0.568604	-0.61637	-0.0533951	-0.221944	0.146239	-0.63891	-0.297237
	Solyc01g014620	-4.16498	-4.16498	-4.16498	-3.17542	-4.16498	-3.15874	-4.16498	-4.16498	-4.16498	-4.16498	-3.49971	-4.16498
	Solyc01g014700	-2.12442	-2.55421	-1.71094	-1.01367	-2.22602	-3.15874	-0.266595	-0.521534	-1.45768	-2.12986	-2.13281	-0.748603
	Solyc01g014720	-4.16498	-4.16498	-4.16498	-4.16498	-3.20539	-4.16498	-4.16498	-4.16498	-4.16498	-4.16498	-3.84511	-4.16498
	Solyc01g014725	-0.943735	-4.16498	-4.16498	-4.16498	-4.16498	-4.16498	-4.16498	-4.16498	-4.16498	-3.09123	-4.16498	-4.16498
	Solyc01g014840	-0.307577	-0.128825	0.383295	1.30638	0.710002	1.30662	0.787537	1.58166	1.6784	-0.0177023	1.10767	1.3492
	Solyc01g014850	3.98143	3.97145	3.93913	3.81977	3.78127	3.84742	3.99531	4.01179	4.13496	3.964	3.81615	4.04735
	Solyc01g014860	0.0558336	-0.544656	0.383295	0.274451	-0.540045	-0.246469	-0.490119	0.29948	-1.03679	-0.0351758	-0.170688	-0.409143
	Solyc01g014910	-4.16498	-3.14558	-4.16498	-3.17542	-3.20539	-4.16498	-3.11525	-3.19557	-4.16498	-3.82518	-3.51526	-3.49193
	Solyc01g014967	-4.16498	-4.16498	-4.16498	-4.16498	-2.22602	-4.16498	-4.16498	-4.16498	-4.16498	-4.16498	-3.51866	-4.16498
	Solyc01g014980	-1.31137	-2.55421	-1.49247	-0.861902	-0.779879	-1.56964	-4.16498	-0.0533951	-0.864919	-1.78602	-1.07047	-1.69443
	Solyc01g014990	-4.16498	-4.16498	-4.16498	-3.17542	-3.20539	-4.16498	-4.16498	-4.16498	-4.16498	-4.16498	-3.51526	-4.16498
	Solyc01g015000	-4.16498	-4.16498	-4.16498	-3.17327	-2.46561	-3.15585	-3.11302	-4.16498	-4.16498	-4.16498	-2.93158	-3.81432
	Solyc01g015020	5.18757	5.0534	5.48557	5.37181	5.4291	5.53287	5.43453	5.54968	5.47229	5.24218	5.44459	5.4855
	Solyc01g015035	-3.13782	-2.13598	-1.9685	-2.59396	-1.64801	-2.23705	-1.76429	-1.63137	-1.23194	-2.4141	-2.15967	-1.54253
	Solyc01g015137	-4.16498	-4.16498	-4.16498	-4.16498	-1.90769	-4.16498	-3.11525	-4.16498	-4.16498	-4.16498	-3.41255	-3.81507
	Solyc01g015250	-4.16498	-2.13598	-3.2421	-4.16498	-2.63415	-3.15874	-3.11525	-4.16498	-2.48133	-3.18102	-3.31929	-3.25385
	Solyc01g015293	2.3145	2.17685	1.10658	2.04316	2.18029	2.51977	2.08123	1.75146	1.86092	1.86598	2.24774	1.89787
	Solyc01g015297	-2.54391	-3.14558	-4.16498	-2.18067	-2.63415	-3.15874	-3.11525	-1.63137	-2.48133	-3.28482	-2.65785	-2.40932
	Solyc01g016355	-4.16498	-4.16498	-4.16498	-4.16498	-3.21171	-4.16498	-4.16498	-4.16498	-3.10175	-4.16498	-3.84722	-3.81057
	Solyc01g016380	-4.16498	-4.16498	-4.16498	-4.16498	-3.20539	-3.15874	-4.16498	-4.16498	-4.16498	-4.16498	-3.5097	-4.16498
	Solyc01g016390	-3.13782	-3.14558	-4.16498	-4.16498	-4.16498	-4.16498	-4.16498	-4.16498	-4.16498	-3.48279	-4.16498	-4.16498
	Solyc01g016410	2.70856	2.92855	3.0953	2.92312	2.94344	2.96632	2.9982	3.22475	2.76073	2.9108	2.9443	2.99456
	Solyc01g016414	-3.13782	-3.14558	-4.16498	-3.17542	-4.16498	-4.16498	-4.16498	-4.16498	-4.16498	-3.48279	-3.83513	-4.16498
	Solyc01g016470	4.88808	5.33702	4.80437	4.724	4.61431	4.71781	5.01479	5.03143	5.09412	5.00982	4.68537	5.04678
	Solyc01g016540	-4.16498	-2.13598	-4.16498	-4.16498	-4.16498	-3.15874	-4.16498	-4.16498	-4.16498	-3.48865	-3.82957	-4.16498
	Solyc01g016545	-3.13782	-4.16498	-4.16498	-3.17542	-4.16498	-4.16498	-4.16498	-4.16498	-4.16498	-3.82259	-3.83513	-4.16498
	Solyc01g016560	-3.13782	-4.16498	-4.16498	-4.16498	-3.20539	-2.57171	-3.11525	-4.16498	-2.05442	-3.82259	-3.31402	-3.11155
	Solyc01g016720	-2.54391	-2.55421	-4.16498	-3.17542	-2.22602	-3.15874	-4.16498	-2.62095	-3.09034	-3.0877	-2.8534	-3.29209
	Solyc01g016970	-4.16498	-3.14558	-4.16498	-4.16498	-4.16498	-3.15874	-4.16498	-3.19557	-4.16498	-3.82518	-3.82957	-3.84184
	Solyc01g017050	0.793975	-1.13121	-2.68379	-0.861902	-0.91662	-1.15408	-0.9078	-1.89231	-1.03679	-1.00701	-0.977535	-1.27897
	Solyc01g017080	-4.16498	-4.16498	-4.16498	-4.16498	-3.20539	-4.16498	-4.16498	-4.16498	-4.16498	-4.16498	-3.84511	-4.16498
	Solyc01g017090	-4.16498	-4.16498	-4.16498	-4.16498	-4.16498	-4.16498	-4.16498	-4.16498	-3.09034	-4.16498	-4.16498	-3.80677
	Solyc01g017560	-4.16498	-4.16498	-4.16498	-4.16498	-4.16498	-4.16498	-4.16498	-4.16498	-3.09034	-4.16498	-4.16498	-3.80677
	Solyc01g017600	3.3884	1.80367	1.53729	1.902	2.11162	1.54767	-2.09102	-2.62095	-4.16498	2.24312	1.85376	-2.95898
	Solyc01g017675	-4.16498	-4.16498	-4.16498	-2.59396	-4.16498	-4.16498	-4.16498	-4.16498	-4.16498	-4.16498	-3.6413	-4.16498
	Solyc01g017720	-2.54391	-3.14558	-2.68379	-4.16498	-4.16498	-4.16498	-2.09102	-4.16498	-4.16498	-2.79109	-4.16498	-3.47366
	Solyc01g017725	-4.16498	-4.16498	-4.16498	-4.16498	-4.16498	-4.16498	-3.11525	-4.16498	-4.16498	-4.16498	-4.16498	-3.81507
	Solyc01g017750	-0.794518	-1.81214	-1.71094	-0.483877	-1.23645	-0.346064	-1.07905	-0.315729	-0.711361	-1.4392	-0.688798	-0.702046
	Solyc01g017795	-4.16498	-4.16498	-4.16498	-3.17542	-4.16498	-4.16498	-4.16498	-4.16498	-4.16498	-4.16498	-3.83513	-4.16498
	Solyc01g017825	-2.54391	-4.16498	-3.2421	-1.8598	-4.16498	-3.15874	-4.16498	-4.16498	-4.16498	-3.317	-3.06117	-4.16498
	Solyc01g017860	2.64325	2.70611	3.14497	2.50077	2.73099	2.92419	2.75221	3.24114	3.58725	2.83144	2.71865	3.19353
	Solyc01g017870	-4.16498	-4.16498	-3.2421	-4.16498	-4.16498	-4.16498	-4.16498	-4.16498	-3.09034	-3.85735	-4.16498	-3.80677
	Solyc01g018010	-1.79983	-1.32453	-1.30277	-1.8598	-3.20539	-2.57171	-0.9078	-1.41047	-1.45768	-1.47571	-2.54563	-1.25865
	Solyc01g020130	-1.52346	-2.13526	-3.2421	-3.13517	-2.63226	-1.56028	-4.16498	-4.16498	-2.05442	-2.30027	-2.44257	-3.46146
	Solyc01g020170	-4.16498	-4.16498	-4.16498	-4.16498	-4.16498	-4.16498	-4.16498	-4.16498	-2.05442	-4.16498	-4.16498	-3.46146
	Solyc01g020190	-2.12442	-3.14558	-4.16498	-3.17471	-4.16498	-4.16498	-4.16498	-3.19557	-4.16498	-3.145	-3.83489	-3.84184
	Solyc01g020220	0.41011	0.119478	0.436068	0.20484	0.216302	0.54743	0.39536	0.419037	-0.329626	0.321885	0.322857	0.16159
	Solyc01g020240	4.7436	4.84214	4.6483	4.55894	4.58295	4.57876	4.63995	4.76198	4.68073	4.74468	4.57355	4.69422
	Solyc01g020245	-3.13782	-2.55421	-3.2421	-2.18067	-1.64801	-2.15563	-2.51409	-2.62095	-2.48133	-2.97804	-1.99477	-2.53879
	Solyc01g020320	3.01775	3.21317	2.78616	2.74497	2.61175	3.05684	2.71332	3.012	3.25586	3.00569	2.80452	2.99372
	Solyc01g020323	-4.16498	-4.16498	-3.2421	-3.17542	-3.20539	-2.15563	-2.09102	-1.63137	-2.05442	-3.85735	-2.84548	-1.9256
	Solyc01g020327	-4.16498	-4.16498	-4.16498	-4.16498	-4.16498	-3.15874	-4.16498	-3.19557	-4.16498	-4.16498	-3.82957	-3.84184
	Solyc01g020340	0.208131	-1.54784	0.326968	-1.01367	-0.154543	0.654379	0.736794	0.0982578	-0.711361	-0.337579	-0.171278	0.0412301
	Solyc01g020343	-3.13782	-4.16498	-3.2421	-2.18067	-1.90826	-3.15874	-4.16498	-3.19557	-4.16498	-3.51496	-2.41589	-3.84184
	Solyc01g020347	-4.16498	-3.14558	-4.16498	-4.16498	-4.16498	-4.16498	-3.11525	-4.16498	-4.16498	-3.82518	-4.16498	-3.81507
	Solyc01g020353	-0.5306	-2.55421	-0.226287	-0.599219	-0.154543	-1.34695	-0.9078	0.0244231	-0.221944	-1.1037	-0.700237	-0.36844
	Solyc01g020357	-0.656533	-1.32453	-1.13515	-0.72459	-1.4276	-0.694228	-1.07905	-0.761662	-1.45768	-1.03874	-0.948807	-1.09946
	Solyc01g020372	-4.16498	-4.16498	-4.16498	-4.16498	-4.16498	-4.16498	-4.16498	-4.16498	-3.09034	-4.16498	-4.16498	-3.80677
	Solyc01g020440	4.43275	5.0332	4.58672	4.73201	4.38261	4.51277	4.65672	4.66348	4.53111	4.68422	4.54246	4.61711
	Solyc01g020495	1.72081	1.19453	2.08778	1.92289	1.92414	1.80146	1.25238	1.72839	1.4694	1.66771	1.88283	1.48339
	Solyc01g020500	-3.13782	-4.16498	-4.16498	-4.16498	-4.16498	-2.15563	-4.16498	-4.16498	-4.16498	-3.82259	-3.4952	-4.16498
	Solyc01g020520	2.05808	1.84752	1.6336	2.11044	1.76403	2.03716	2.10143	2.39016	2.41992	1.8464	1.97054	2.30384
	Solyc01g020524	-4.16498	-1.32391	-1.49186	-1.46443	-1.9074	-0.164811	-2.09102	-1.13381	-1.69456	-2.32692	-1.17888	-1.63979
	Solyc01g020526	-2.12442	-3.14558	-4.16498	-1.86816	-2.01538	-1.35046	-1.01764	-2.21111	-4.16498	-3.145	-1.74467	-2.46458
	Solyc01g020528	0.808539	0.627032	0.768807	0.721654	1.0406	1.09507	0.795145	0.0244231	-0.121745	0.734793	0.952442	0.232608
	Solyc01g021600	-1.53502	-3.14558	-1.9685	-3.17542	-2.22602	-4.16498	-2.09102	-4.16498	-2.05442	-2.21637	-3.18881	-2.77014
	Solyc01g021640	3.60284	3.49541	3.83688	3.62794	3.34593	3.55477	3.448	3.57449	3.74154	3.64504	3.50955	3.58801
	Solyc01g021730	0.587253	-0.808326	-4.16498	-3.17542	-2.22602	-2.15563	-2.09102	-1.21895	-4.16498	-1.46202	-2.51903	-2.49165
	Solyc01g022740	3.50329	3.63493	3.44538	3.56235	3.41167	3.40964	3.51729	3.29708	3.50344	3.52786	3.46122	3.43927
	Solyc01g022750	5.38862	5.7864	5.44645	5.49532	5.251	5.48045	5.64171	5.81078	5.84157	5.54049	5.40892	5.76469
	Solyc01g022785	-4.16498	-3.14558	-3.2421	-4.16498	-4.16498	-4.16498	-4.16498	-4.16498	-4.16498	-3.51755	-4.16498	-4.16498
	Solyc01g028800	2.42744	2.13985	2.35049	2.41419	2.41209	2.27359	3.06143	2.79603	3.28353	2.30592	2.36662	3.047
	Solyc01g028803	1.37953	0.515888	1.07273	0.721654	0.925307	1.6286	0.0147099	0.682169	1.22491	0.989379	1.09185	0.640595
	Solyc01g028807	2.98644	2.76805	3.11202	2.84764	3.48815	3.80742	2.64616	2.85046	3.00193	2.9555	3.38107	2.83285
	Solyc01g028810	10.2251	10.2186	10.3383	10.2647	10.1504	9.85596	10.1729	9.87656	9.88414	10.2607	10.0904	9.97786
	Solyc01g028830	4.61664	4.94226	4.65779	4.66897	4.645	4.53743	4.73351	4.78457	4.68766	4.7389	4.61714	4.73524
	Solyc01g028860	8.82757	8.6888	9.06877	9.01499	9.14614	9.05168	8.98775	9.04563	8.9937	8.86172	9.07094	9.00903
	Solyc01g028870	5.06368	5.15426	5.10712	5.18913	4.93558	5.00203	4.95787	4.76765	5.03021	5.10835	5.04225	4.91858
	Solyc01g028900	7.12333	7.20947	7.06726	7.01469	7.0553	6.87119	7.09116	7.16736	7.08587	7.13335	6.98039	7.1148
	Solyc01g028930	4.46614	4.62501	4.45488	4.26105	4.4292	4.42108	4.68749	4.47029	4.46808	4.51534	4.37044	4.54196
	Solyc01g028965	-4.16498	-3.14558	-4.16498	-4.16498	-4.16498	-4.16498	-4.16498	-4.16498	-4.16498	-3.82518	-4.16498	-4.16498
	Solyc01g033995	-2.12442	-4.16498	-4.16498	-4.16498	-3.20539	-4.16498	-3.11525	-4.16498	-4.16498	-3.48479	-3.84511	-3.81507
	Solyc01g034010	-2.54391	-4.16498	-4.16498	-4.16498	-4.16498	-4.16498	-4.16498	-4.16498	-4.16498	-3.62462	-4.16498	-4.16498
	Solyc01g034020	6.52944	6.56091	6.33532	6.49114	6.2796	6.46125	6.57872	6.60293	6.72289	6.47522	6.41066	6.63485
	Solyc01g034040	-3.13782	-4.16498	-4.16498	-4.16498	-4.16498	-2.15563	-3.11525	-1.89231	-1.45768	-3.82259	-3.4952	-2.15508
	Solyc01g034075	-4.16498	-4.16498	-4.16498	-4.16498	-4.16498	-2.57171	-4.16498	-2.62095	-4.16498	-4.16498	-3.63389	-3.6503
	Solyc01g034080	-1.11777	-0.128825	-1.49247	-0.483877	-0.334456	-2.57171	-1.07905	-1.21895	-1.72541	-0.913023	-1.13001	-1.34114
	Solyc01g034145	-4.16498	-4.16498	-4.16498	-4.16498	-3.20469	-4.16498	-4.16498	-4.16498	-4.16498	-4.16498	-3.84488	-4.16498
	Solyc01g034150	2.68279	3.17709	3.19304	3.03337	3.2613	3.53391	3.122	3.42454	3.05642	3.01764	3.27619	3.20098
	Solyc01g044270	3.96011	3.90131	4.14042	4.30203	4.44324	4.17386	4.15167	4.42797	4.16503	4.00062	4.30638	4.24822
	Solyc01g044340	1.56024	1.23018	1.65636	1.13652	1.5619	0.801263	0.883963	0.5304	0.882894	1.48226	1.16656	0.765752
	Solyc01g044350	3.28085	3.23087	3.49734	3.39913	3.41879	3.6222	3.19899	3.64996	3.58725	3.33636	3.48004	3.47873
	Solyc01g044360	7.38157	7.22257	7.63523	7.4222	7.44876	7.32117	7.42104	7.28825	7.32747	7.41313	7.39738	7.34558
	Solyc01g044365	2.07795	2.10186	2.47235	1.79168	2.29311	2.25671	2.39118	2.37374	2.53374	2.21739	2.11383	2.43289
	Solyc01g044370	0.41011	0.627032	0.725887	1.17213	0.511049	1.31097	-0.073102	0.168497	1.26247	0.587676	0.998049	0.452623
	Solyc01g044375	-3.13782	-2.55421	-2.68379	-4.16498	-1.90826	-1.87205	-4.16498	-1.0499	-2.48133	-2.79194	-2.64843	-2.5654
	Solyc01g044420	-2.54391	-2.55421	-3.2421	-3.17542	-4.16498	-4.16498	-3.11525	-1.89231	-4.16498	-2.78007	-3.83513	-3.05751
	Solyc01g044490	4.88602	5.00785	4.61928	4.73594	4.80032	4.74831	4.65711	4.74771	4.85378	4.83771	4.76153	4.75287
	Solyc01g044520	-4.16498	-4.16498	-4.16498	-4.16498	-4.16498	-4.16498	-4.16498	-4.16498	-3.09034	-4.16498	-4.16498	-3.80677
	Solyc01g044551	-3.13782	-3.14558	-2.28226	-4.16498	-0.540045	-2.57171	-1.76429	-3.19557	-2.05442	-2.85522	-2.42558	-2.33809
	Solyc01g044552	-4.16498	-4.16498	-4.16498	-4.16498	-4.16498	-4.16498	-4.16498	-3.19557	-4.16498	-4.16498	-4.16498	-3.84184
	Solyc01g044556	0.745005	-0.544656	0.538784	0.301266	0.61358	1.51509	0.920844	0.47521	1.18379	0.246378	0.809978	0.859948
	Solyc01g044558	1.58621	1.66197	1.58675	2.15426	2.06446	2.69916	2.57883	2.43131	2.81153	1.61164	2.30596	2.60722
	Solyc01g049650	8.21755	8.27015	8.21199	8.29045	8.24005	8.04699	8.37239	8.26128	8.26398	8.23323	8.1925	8.29922
	Solyc01g049680	5.73661	5.65128	5.58413	5.6271	5.60312	5.74695	5.84449	5.89949	6.00246	5.65734	5.65906	5.91548
	Solyc01g049690	4.74198	4.63004	4.51779	4.71036	4.4887	4.17793	4.7731	4.63238	4.73949	4.62994	4.459	4.71499
	Solyc01g049770	1.58827	1.26497	1.23457	1.88046	2.21343	2.56159	1.24252	1.63224	1.81109	1.3626	2.2185	1.56195
	Solyc01g049810	0.0558336	-0.428935	0.207255	0.515312	0.0791806	-0.246469	-0.073102	-0.521534	-0.0280548	-0.0552822	0.116008	-0.207564
	Solyc01g049880	0.146188	0.952191	-0.416379	0.628541	1.00205	-0.0292468	0.911723	0.915661	0.866446	0.227333	0.533781	0.897943
	Solyc01g049890	8.54171	8.49185	8.43445	8.49948	8.51743	8.25046	8.64242	8.53655	8.57348	8.48934	8.42246	8.58415
	Solyc01g049910	1.44225	1.65731	1.90724	1.58049	2.03154	2.01718	1.63144	2.0007	2.02563	1.66894	1.8764	1.88592
	Solyc01g049920	-3.13782	-2.13598	-1.9685	-3.17542	-2.22602	-3.15874	-1.76429	-1.41047	-4.16498	-2.4141	-2.8534	-2.44658
	Solyc01g049960	6.03836	6.21671	5.95095	5.97395	5.87775	5.91892	6.09261	5.74772	6.00978	6.06867	5.92354	5.95004
	Solyc01g050010	2.17357	1.89534	2.15404	1.88046	2.07602	2.69285	1.86201	2.18331	2.30082	2.07432	2.21645	2.11538
	Solyc01g050040	3.49591	3.58073	3.34967	3.47238	3.54133	3.58212	3.47147	3.72762	3.60928	3.47544	3.53194	3.60279
	Solyc01g050045	-4.16498	-4.16498	-4.16498	-4.16498	-4.16498	-4.16498	-4.16498	-3.19557	-4.16498	-4.16498	-4.16498	-3.84184
	Solyc01g050050	-3.13782	-4.16498	-4.16498	-4.16498	-4.16498	-4.16498	-4.16498	-4.16498	-4.16498	-3.82259	-4.16498	-4.16498
	Solyc01g050070	3.97612	3.9178	3.85193	3.82537	4.06693	3.5956	3.71375	3.91806	3.96877	3.91528	3.8293	3.86686
	Solyc01g056260	-2.54391	-4.16498	-4.16498	-1.59746	-2.63415	-3.15874	-2.09102	-4.16498	-4.16498	-3.62462	-2.46345	-3.47366
	Solyc01g056310	-2.12442	-3.14558	1.98232	-1.1833	-0.433591	0.54743	-1.49806	-1.41047	0.295614	-1.09589	-0.356488	-0.870974
	Solyc01g056320	-4.16498	-4.16498	-3.2421	-4.16498	-2.22602	-4.16498	-4.16498	-3.19557	-3.09034	-3.85735	-3.51866	-3.48363
	Solyc01g056340	3.22837	2.95009	3.35672	2.92274	3.33091	3.37878	2.89785	2.95352	2.87428	3.17839	3.21081	2.90855
	Solyc01g056360	-4.16498	-4.16498	-4.16498	-3.17542	-2.22602	-4.16498	-3.11525	-4.16498	-4.16498	-4.16498	-3.18881	-3.81507
	Solyc01g056370	-4.16498	-4.16498	-4.16498	-4.16498	-4.16498	-4.16498	-2.51409	-4.16498	-4.16498	-4.16498	-4.16498	-3.61468
	Solyc01g056480	-0.5306	-0.428935	-0.066854	-0.184621	0.14937	-1.34695	-0.266595	-0.222882	-0.0280548	-0.34213	-0.460734	-0.172511
	Solyc01g056520	4.82117	4.60478	5.06279	4.84477	4.80577	4.88362	4.65965	4.76765	4.65977	4.82958	4.84472	4.69569
	Solyc01g056570	5.3877	5.39314	5.52523	5.71796	5.50447	5.61894	5.39825	5.48061	5.31112	5.43535	5.61379	5.39666
	Solyc01g056580	-2.53905	-0.531941	-4.16498	-2.58775	-2.31132	-3.15152	-3.1093	-2.59791	-4.16498	-2.41199	-2.68353	-3.29073
	Solyc01g056600	0.208131	0.332765	0.636016	0.902144	0.82388	-0.246469	0.175762	0.729407	0.930349	0.392304	0.493185	0.611839
	Solyc01g056610	-1.79983	-1.81883	-0.987123	-1.8598	-2.22602	-1.00174	-2.09102	-2.21361	-1.45768	-1.53526	-1.69585	-1.92077
	Solyc01g056620	2.83093	2.65457	3.12045	3.08098	2.92355	3.3321	3.11208	3.38826	3.07765	2.86865	3.11221	3.19266
	Solyc01g056653	-4.16498	-4.16498	-4.16498	-4.16498	-4.16498	-4.16498	-4.16498	-2.62095	-4.16498	-4.16498	-4.16498	-3.6503
	Solyc01g056690	4.6668	4.86783	4.58661	4.68138	4.67229	4.48768	4.73351	4.56122	4.63492	4.70708	4.61378	4.64322
	Solyc01g056720	4.38855	4.55646	4.33147	4.40283	4.18791	4.37881	4.51	4.55468	4.55012	4.42549	4.32319	4.53827
	Solyc01g056730	-0.0473588	0.193579	-0.066854	-0.0148423	-0.154543	0.0947421	-0.0219592	-0.521534	-0.0280548	0.0264554	-0.024881	-0.190516
	Solyc01g056750	0.225371	-0.128825	-1.30277	-0.184621	-0.582878	0.306335	-0.612417	-1.0499	-1.03679	-0.402076	-0.153721	-0.899701
	Solyc01g056760	1.69466	1.85023	1.38008	1.27397	1.64641	2.25671	2.08939	1.70492	2.18821	1.64166	1.7257	1.99417
	Solyc01g056770	-1.79316	-2.55421	-0.984982	-1.37557	-3.20539	-1.56964	-3.11525	-2.21076	-1.72541	-1.77745	-2.0502	-2.35047
	Solyc01g056780	4.88026	4.83061	4.67393	5.54207	5.16491	5.15351	4.40643	4.13969	4.16503	4.79493	5.28683	4.23705
	Solyc01g056790	0.641776	0.627032	0.58889	0.0630985	0.0791806	0.601895	0.175762	-0.414965	0.67573	0.619233	0.248058	0.145509
	Solyc01g056800	0.587253	0.193579	0.326968	-0.483877	0.00540131	0.168775	-0.073102	-0.414965	0.366335	0.369267	-0.103233	-0.0405774
	Solyc01g056810	3.61254	3.8334	3.34967	3.51653	3.78829	3.6824	3.33645	3.83412	3.78948	3.59854	3.66241	3.65335
	Solyc01g056830	1.0051	1.33212	0.636016	0.846894	1.17209	0.962642	0.716615	1.29811	0.817309	0.99108	0.993875	0.944011
	Solyc01g056850	5.29391	5.25936	4.52228	4.97144	4.96168	4.83044	5.3207	5.46565	5.16526	5.02518	4.92119	5.3172
	Solyc01g056940	-2.22895	-1.74498	-4.16498	-2.22223	-1.84302	-2.94939	-2.94255	-3.01096	-2.87859	-2.71297	-2.33821	-2.94403
	Solyc01g056990	0.641776	1.04242	-0.6103	0.137044	0.341514	-0.568604	0.736794	0.633332	0.142838	0.357966	-0.0300154	0.504321
	Solyc01g057000	6.73575	6.38725	7.43711	6.26374	7.03724	6.46033	7.32049	7.57732	7.92004	6.85337	6.5871	7.60595
	Solyc01g057020	2.66973	2.54674	2.82735	2.88031	2.69624	2.58716	2.6184	2.65635	2.37155	2.68127	2.72124	2.54877
	Solyc01g057080	-4.16498	-3.14558	-4.16498	-4.16498	-4.16498	-4.16498	-4.16498	-4.16498	-4.16498	-3.82518	-4.16498	-4.16498
	Solyc01g057090	4.86036	4.79829	4.83911	4.66585	4.9602	4.81034	4.93264	4.85544	4.83208	4.83258	4.81213	4.87338
	Solyc01g057150	-3.13782	-4.16498	-4.16498	-3.17542	-4.16498	-4.16498	-4.16498	-4.16498	-4.16498	-3.82259	-3.83513	-4.16498
	Solyc01g057165	1.0573	-0.0412223	1.20362	0.33854	0.511049	0.84708	0.0147099	0.682169	0.43375	0.739902	0.565556	0.376876
	Solyc01g057200	3.69597	3.65474	3.6827	3.97693	3.80864	3.83041	3.45587	3.19981	3.21811	3.6778	3.87199	3.29126
	Solyc01g057210	6.36796	6.26619	6.52014	6.30204	6.23288	6.19681	6.50735	6.46857	6.46636	6.38476	6.24391	6.48076
	Solyc01g057220	-4.16498	-4.16498	-4.16498	-4.16498	-4.16498	-3.15874	-4.16498	-4.16498	-4.16498	-4.16498	-3.82957	-4.16498
	Solyc01g057260	-1.79983	-3.14558	-1.49247	-1.8598	-0.91662	-1.56964	-0.9078	-0.898593	-2.05442	-2.14596	-1.44868	-1.28694
	Solyc01g057270	-0.414783	-1.54784	-0.405554	-0.377078	-0.540045	-0.246469	-0.073102	-0.222882	-0.329626	-0.789391	-0.387864	-0.208537
	Solyc01g057300	-0.0268016	-0.428935	-0.405554	-0.861902	0.280266	-0.153308	0.929862	1.44684	1.06401	-0.287097	-0.244981	1.1469
	Solyc01g057310	1.13538	1.57329	0.681651	1.4292	1.21439	1.20472	1.76405	1.23404	0.930349	1.13011	1.28277	1.30948
	Solyc01g057320	-1.53502	-1.32453	0.326968	-1.1833	-2.63415	-1.34695	-0.754739	-0.898593	-1.45768	-0.844196	-1.72147	-1.037
	Solyc01g057330	-4.16498	-4.16498	-4.16498	-4.16498	-4.16498	-3.15874	-4.16498	-4.16498	-4.16498	-4.16498	-3.82957	-4.16498
	Solyc01g057340	1.97553	1.73088	1.70137	2.0238	2.11162	2.01722	2.1795	2.1138	2.02292	1.80259	2.05088	2.10541
	Solyc01g057430	-3.13782	-1.81214	-4.16498	-2.59396	-1.64801	-4.16498	-3.11525	-4.16498	-2.48133	-3.03831	-2.80231	-3.25385
	Solyc01g057440	-0.5306	-1.54784	-0.504298	-1.1833	-0.654984	-0.568604	-0.266595	-0.636608	-2.05442	-0.860911	-0.802297	-0.985874
	Solyc01g057445	1.84219	2.57367	2.35049	2.64714	2.00208	2.30676	2.3411	2.60662	2.43848	2.25545	2.31866	2.46207
	Solyc01g057520	5.38463	5.20888	5.50633	5.39288	5.37077	5.21303	5.72713	5.46933	5.15781	5.36661	5.32556	5.45142
	Solyc01g057570	3.56807	3.89577	3.90109	3.73896	3.43995	3.7116	3.7653	3.68633	3.82552	3.78831	3.63017	3.75905
	Solyc01g057600	-2.54391	-1.32453	-0.504298	-1.37557	-0.779879	-0.453047	-2.09102	-0.414965	-0.711361	-1.45758	-0.869499	-1.07245
	Solyc01g057705	-4.16498	-3.14558	-3.2421	-4.16498	-3.20539	-4.16498	-1.76429	-4.16498	-2.05442	-3.51755	-3.84511	-2.66123
	Solyc01g057760	5.67342	5.39734	5.95168	5.72399	5.78575	5.70232	5.67593	5.59342	5.62252	5.67415	5.73735	5.63062
	Solyc01g057770	4.57015	5.43384	4.15404	6.05253	4.71321	4.22681	4.26344	4.8581	3.98571	4.71934	4.99752	4.36908
	Solyc01g057780	4.7436	4.65154	4.96671	4.90421	4.96264	5.08108	4.61909	4.60304	4.57273	4.78728	4.98264	4.59828
	Solyc01g057785	-1.79983	-2.13598	-4.16498	-4.16498	-4.16498	-4.16498	-2.51409	-4.16498	-4.16498	-2.70026	-4.16498	-3.61468
	Solyc01g057830	6.98041	7.03343	6.82611	7.28822	6.90727	6.519	6.53174	6.11307	6.05464	6.94665	6.90483	6.23315
	Solyc01g057840	3.38041	3.77426	3.823	3.74451	3.84617	3.69295	3.68819	3.72514	3.5798	3.65922	3.76121	3.66438
	Solyc01g057850	3.51063	3.53941	4.01053	3.43669	3.57988	3.51977	3.62489	3.46297	3.08819	3.68685	3.51212	3.39201
	Solyc01g057853	-2.12442	-4.16498	-2.68379	-1.1833	-2.22602	-2.15563	-3.11525	-2.21111	-2.48133	-2.99106	-1.85499	-2.60257
	Solyc01g057855	-4.16498	-4.16498	-4.16498	-4.16498	-4.16498	-3.15874	-4.16498	-4.16498	-2.05442	-4.16498	-3.82957	-3.46146
	Solyc01g057900	5.72596	5.52979	5.91736	5.72398	5.74181	5.76333	5.73038	5.55951	5.64579	5.72437	5.74304	5.64523
	Solyc01g057910	1.47271	1.39629	1.46083	0.721654	0.216302	1.27344	1.78917	1.47483	1.3348	1.44327	0.737133	1.53293
	Solyc01g058010	2.83093	2.92855	3.04376	2.98413	3.00152	2.86974	2.56122	2.88216	2.92202	2.93441	2.9518	2.78846
	Solyc01g058020	1.44231	1.75555	2.00044	1.88046	1.90398	2.35525	1.76405	1.90336	2.04465	1.73277	2.04656	1.90402
	Solyc01g058060	-4.16498	-3.14558	-4.16498	-4.16498	-4.16498	-4.16498	-4.16498	-4.16498	-4.16498	-3.82518	-4.16498	-4.16498
	Solyc01g058100	-1.31137	-1.54784	-1.30277	-2.59396	-4.16498	-2.15563	-3.11525	-4.16498	-2.48133	-1.38732	-2.97152	-3.25385
	Solyc01g058120	-3.13782	-4.16498	-2.68379	-3.17542	-3.20539	-2.57171	-3.11525	-4.16498	-4.16498	-3.32886	-2.98417	-3.81507
	Solyc01g058140	5.82621	5.79684	5.91497	5.7654	5.94289	5.86982	5.76085	5.72598	5.79104	5.846	5.85937	5.75929
	Solyc01g058160	2.60302	1.68023	2.48527	2.59561	2.48176	2.30676	2.30672	2.26573	1.93259	2.25617	2.46138	2.16835
	Solyc01g058170	2.01737	1.91737	1.70137	2.09973	1.88353	2.01722	2.43958	2.21684	1.53227	1.8787	2.00016	2.06289
	Solyc01g058190	4.78052	5.13099	4.81883	4.98749	4.8316	4.62223	4.83341	4.79566	4.6244	4.91011	4.81377	4.75116
	Solyc01g058200	-0.794518	-0.808326	-1.13515	-1.8598	-1.64801	-0.983986	-1.492	-1.89231	-1.72541	-0.912663	-1.49726	-1.70324
	Solyc01g058205	2.39606	2.58744	2.93491	2.81423	2.80896	2.82465	2.72638	2.8611	2.70724	2.63947	2.81594	2.76491
	Solyc01g058210	1.7052	1.51665	1.92669	1.9127	1.48255	1.82455	1.59564	1.8175	1.36964	1.71618	1.73993	1.59426
	Solyc01g058260	6.42467	6.28055	6.5647	6.34645	6.5058	6.62472	6.44991	6.73593	6.63249	6.42331	6.49232	6.60611
	Solyc01g058270	4.99045	5.04841	4.71566	5.20641	5.03139	5.01987	5.24101	5.19414	5.07049	4.91818	5.08589	5.16854
	Solyc01g058280	5.55767	5.63344	5.37706	5.60362	5.58196	5.71473	5.54003	5.91193	5.94475	5.52272	5.63344	5.7989
	Solyc01g058320	7.51797	7.76695	7.00262	7.54627	7.4043	7.31962	7.82062	7.99124	7.92932	7.42918	7.4234	7.91373
	Solyc01g058390	5.91795	6.07442	5.95849	5.84337	6.05346	5.63209	6.19386	6.1526	6.01949	5.98362	5.84297	6.12198
	Solyc01g058450	4.68314	4.55295	4.86406	4.75662	4.75321	4.75733	4.91277	4.82586	4.60599	4.70005	4.75572	4.78154
	Solyc01g058470	-0.114459	-2.55421	-0.6103	-0.599219	0.563405	-0.346064	0.0974822	-0.898593	-0.221944	-1.09299	-0.127292	-0.341018
	Solyc01g058520	-0.307577	0.119478	-0.313138	0.0630985	-0.0723553	0.306335	0.387947	0.29948	0.559808	-0.167079	0.0990261	0.415745
	Solyc01g058530	-0.307577	0.264059	0.207255	0.274451	0.400267	0.306335	0.736794	0.168497	0.882894	0.0545788	0.327018	0.596062
	Solyc01g058535	-2.54391	-4.16498	-1.9685	-4.16498	-4.16498	-4.16498	-4.16498	-4.16498	-4.16498	-2.89246	-4.16498	-4.16498
	Solyc01g058540	0.745005	0.916795	1.172	1.10289	1.79871	1.20472	1.25238	1.88261	1.70593	0.944598	1.36877	1.61364
	Solyc01g058597	-2.12442	-1.81214	-1.49247	-4.16498	-4.16498	-4.16498	-4.16498	-3.19557	-4.16498	-1.80968	-4.16498	-3.84184
	Solyc01g058670	7.52541	7.65162	7.53208	7.45324	7.28547	7.59698	7.54118	7.55455	7.59391	7.56971	7.44523	7.56322
	Solyc01g058720	1.47271	1.73088	-0.144369	-0.277642	-0.241697	-0.161722	-1.07905	-0.898593	-0.0280548	1.01974	-0.22702	-0.668565
	Solyc01g058730	6.51291	6.55684	6.71329	6.67205	6.6532	6.41729	6.66154	6.37211	6.30245	6.59435	6.58085	6.44537
	Solyc01g059760	-4.16498	-4.16498	-3.2421	-4.16498	-3.20539	-2.15563	-4.16498	-4.16498	-4.16498	-3.85735	-3.17533	-4.16498
	Solyc01g059830	5.79351	5.78949	5.63541	5.54879	5.52792	5.19396	5.94397	5.74498	5.85853	5.73947	5.42356	5.84916
	Solyc01g059840	-4.16498	-4.16498	-4.16498	-4.16498	-4.16498	-3.15874	-3.11525	-3.19557	-4.16498	-4.16498	-3.82957	-3.49193
	Solyc01g059860	5.76817	5.55162	5.69756	5.69597	5.92679	5.73162	5.51243	5.63435	5.68955	5.67245	5.78479	5.61211
	Solyc01g059870	5.88284	5.66429	5.99622	5.65198	5.75076	6.00859	5.9634	5.58221	5.77657	5.84779	5.80378	5.77406
	Solyc01g059880	7.23321	7.16586	7.17084	7.29497	7.14968	7.13863	7.29021	7.32126	7.20819	7.18997	7.19443	7.27322
	Solyc01g059900	-3.13782	-3.14558	-4.16498	-4.16498	-4.16498	-4.16498	-4.16498	-4.16498	-1.72541	-3.48279	-4.16498	-3.35179
	Solyc01g059910	-4.16498	-4.16498	-3.2421	-4.16498	-4.16498	-4.16498	-4.16498	-4.16498	-4.16498	-3.85735	-4.16498	-4.16498
	Solyc01g059920	3.2014	3.24836	2.99049	3.28178	2.92355	3.08579	3.0717	3.41012	2.99078	3.14675	3.09704	3.15753
	Solyc01g059930	7.12243	7.27282	6.82613	6.81986	6.80832	6.9122	7.05909	7.14606	7.09626	7.07379	6.84679	7.10047
	Solyc01g059940	-4.16498	-4.16498	-3.2421	-4.16498	-4.16498	-4.16498	-4.16498	-4.16498	-3.09034	-3.85735	-4.16498	-3.80677
	Solyc01g059950	-0.114459	0.515888	0.768807	0.274451	-0.241697	0.753944	-0.266595	0.29948	0.730376	0.390079	0.262233	0.254421
	Solyc01g059965	4.40347	3.83779	5.49253	1.09292	5.23294	4.92709	-0.374032	0.944853	0.559808	4.57793	3.75098	0.376876
	Solyc01g060010	-1.11777	-2.13598	-2.68379	-4.16498	-1.90826	-1.56964	-2.09102	-3.19557	-2.48133	-1.97918	-2.54762	-2.58931
	Solyc01g060015	-3.13782	-4.16498	-4.16498	-4.16498	-4.16498	-4.16498	-4.16498	-4.16498	-4.16498	-3.82259	-4.16498	-4.16498
	Solyc01g060020	-0.185213	-0.297039	3.73872	2.00834	-4.16498	1.05424	-4.16498	-4.16498	-4.16498	1.08549	-0.367466	-4.16498
	Solyc01g060030	6.06851	6.10834	6.03084	6.06471	6.19296	6.11541	6.38087	6.42144	6.5255	6.06923	6.12436	6.4426
	Solyc01g060040	3.38041	3.22205	3.73775	3.34559	3.70175	3.94545	3.47921	3.6923	3.63815	3.44673	3.66426	3.60322
	Solyc01g060050	2.13608	1.26497	2.52337	1.92289	1.94402	2.25671	2.10143	2.07775	1.4694	1.9748	2.04121	1.88286
	Solyc01g060070	3.74037	3.61484	3.86682	3.28991	3.27706	3.45473	3.46318	3.77904	3.75478	3.74068	3.34057	3.66567
	Solyc01g060080	3.73476	3.77426	3.6883	3.56905	3.70747	3.94018	3.75895	3.87669	3.74644	3.73244	3.7389	3.79403
	Solyc01g060090	1.34708	1.54523	2.39226	1.7686	1.79871	1.84727	1.72308	1.72371	1.40367	1.76152	1.80486	1.61682
	Solyc01g060100	-1.31137	-2.55421	-4.16498	-3.17542	-1.90826	-3.15874	-2.51409	-3.06024	-1.72541	-2.67685	-2.74747	-2.43325
	Solyc01g060130	4.35222	4.62166	4.1157	4.3455	4.24913	4.35126	4.27731	4.28527	4.41486	4.36319	4.3153	4.32581
	Solyc01g060140	6.56917	6.50284	6.9838	6.68444	6.74457	6.8813	6.74655	6.6487	6.65658	6.68527	6.7701	6.68394
	Solyc01g060160	-4.16498	-4.16498	-3.2421	-4.16498	-4.16498	-4.16498	-3.11525	-4.16498	-4.16498	-3.85735	-4.16498	-3.81507
	Solyc01g060170	4.0076	3.62826	4.38763	4.07622	4.17535	3.90325	3.97686	3.76777	3.3635	4.00783	4.05161	3.70271
	Solyc01g060180	5.13906	5.39706	5.69016	5.48651	5.58286	5.22031	5.06454	5.0212	5.19228	5.40876	5.42989	5.09268
	Solyc01g060183	-1.53575	-2.13272	-1.49247	-3.17542	-1.06769	-1.34201	-1.49806	-1.63137	-1.03679	-1.72031	-1.86171	-1.38874
	Solyc01g060187	-4.16498	-3.14558	-4.16498	-2.18067	-3.20539	-4.16498	-4.16498	-4.16498	-4.16498	-3.82518	-3.18368	-4.16498
	Solyc01g060200	-3.13782	-3.14558	-2.68379	-3.17542	-2.63415	-4.16498	-2.09102	-1.89231	-4.16498	-2.98906	-3.32485	-2.7161
	Solyc01g060210	-0.414783	-0.0412223	0.143454	-1.59746	0.14937	0.239194	-0.490119	0.168497	-1.03679	-0.104184	-0.402966	-0.452804
	Solyc01g060240	3.29793	3.79226	2.70008	3.61927	3.29265	3.14201	3.68057	4.05878	3.79686	3.26342	3.35131	3.8454
	Solyc01g060250	-0.5306	-1.13121	0.00670807	-0.861902	-1.23645	-0.153308	-1.76429	-1.89231	-0.423272	-0.5517	-0.750554	-1.35996
	Solyc01g060260	0.345875	-0.222093	1.5619	-1.8598	0.400267	0.168775	-3.11525	0.0982578	-0.445998	0.561895	-0.430251	-1.15433
	Solyc01g060270	-4.16498	-3.14558	-3.2421	-4.16498	-4.16498	-4.16498	-4.16498	-4.16498	-4.16498	-3.51755	-4.16498	-4.16498
	Solyc01g060280	4.11945	4.12136	4.28842	4.00396	4.33822	4.34329	4.25445	4.27859	4.18961	4.17641	4.22849	4.24089
	Solyc01g060375	-3.13782	-4.16498	-4.16498	-4.16498	-4.16498	-1.83309	-4.16498	-1.89231	-1.72541	-3.82259	-3.38768	-2.59424
	Solyc01g060390	0.931639	-0.128825	0.58889	-0.0972355	0.14937	0.306335	-0.166607	-0.222882	0.618933	0.463901	0.11949	0.0764812
	Solyc01g060395	-3.13782	-4.16498	-4.16498	-4.16498	-4.16498	-4.16498	-4.16498	-4.16498	-4.16498	-3.82259	-4.16498	-4.16498
	Solyc01g060410	-0.0268016	-1.32453	-0.848986	-0.377078	0.00540131	0.168775	0.320628	-0.898593	-0.329626	-0.73344	-0.0676337	-0.30253
	Solyc01g060420	-0.307577	-0.128825	-1.9685	-1.8598	-1.90826	-0.246469	-1.2734	-1.63137	-0.864919	-0.801636	-1.33817	-1.25656
	Solyc01g060450	-1.79983	-1.81214	-1.49247	-4.16498	-2.22602	-1.83309	-1.76429	-2.21111	-1.72541	-1.70148	-2.74136	-1.90027
	Solyc01g060460	-1.53502	-1.54784	-1.49247	-1.59746	-3.20539	-3.15874	-4.16498	-2.62095	-4.16498	-1.52511	-2.65386	-3.6503
	Solyc01g060470	7.69411	7.56998	7.76947	7.70865	7.51027	7.4988	7.85792	7.65162	7.72584	7.67785	7.57257	7.74513
	Solyc01g060490	-0.414783	0.0413643	-0.6103	-0.184621	-0.540045	-0.831845	-0.9078	-0.0533951	-0.0280548	-0.327906	-0.518837	-0.32975
	Solyc01g065490	3.59595	3.70628	3.97158	3.57571	3.72492	4.03725	3.80278	4.0998	4.11456	3.75794	3.77929	4.00571
	Solyc01g065500	3.41212	3.02303	3.54133	4.08559	3.87746	3.80742	3.97138	3.9383	3.54975	3.3255	3.92349	3.81981
	Solyc01g065510	4.81058	4.42035	4.05197	4.04295	3.53478	4.34329	3.45587	3.38083	3.42277	4.42763	3.97367	3.41982
	Solyc01g065530	6.10528	5.28054	4.21603	5.00885	4.75039	4.35535	4.55463	4.91028	4.16006	5.20062	4.70486	4.54166
	Solyc01g065540	4.51807	4.37329	4.75656	4.35331	4.56712	4.83756	4.21792	4.54481	4.45191	4.54931	4.586	4.40488
	Solyc01g065550	3.87732	4.00784	3.59001	4.03355	3.98946	3.8132	3.96036	4.02605	4.07288	3.82506	3.94541	4.01976
	Solyc01g065560	3.30639	3.04321	3.37767	3.30603	3.27706	3.53391	2.88625	3.1914	3.52678	3.24242	3.37233	3.20148
	Solyc01g065570	-2.54391	-4.16498	-2.28226	-4.16498	-4.16498	-4.16498	-4.16498	-1.89231	-4.16498	-2.99705	-4.16498	-3.40742
	Solyc01g065580	5.36248	5.50832	5.54412	5.54201	5.3752	5.55998	5.53099	5.4135	5.5465	5.47164	5.49239	5.497
	Solyc01g065640	-4.16498	-4.16498	-4.16498	-4.16498	-4.16498	-4.16498	-1.76429	-4.16498	-4.16498	-4.16498	-4.16498	-3.36475
	Solyc01g065647	-4.16498	-4.16498	-4.16498	-4.16498	-4.16498	-4.16498	-2.09102	-4.16498	-3.09034	-4.16498	-4.16498	-3.11544
	Solyc01g065680	-0.307577	-0.128825	0.489752	0.207383	-0.540045	0.431913	0.0974822	-0.636608	-0.329626	0.0177832	0.0330835	-0.289584
	Solyc01g065690	2.7953	2.60111	3.1531	2.24057	2.39774	3.17831	2.08123	2.78489	2.82491	2.84984	2.60554	2.56368
	Solyc01g065700	-0.794518	-0.960753	-1.49247	-1.37557	-2.63415	-3.15874	-0.754739	-1.0499	-1.45768	-1.08258	-2.38949	-1.08744
	Solyc01g065710	2.80727	3.29118	2.73296	2.93315	2.92355	3.04705	2.94331	3.28132	3.25586	2.94381	2.96792	3.16016
	Solyc01g065720	5.35639	5.0805	5.76633	5.26942	5.5229	5.51634	5.69592	5.87914	5.70327	5.40107	5.43622	5.75944
	Solyc01g065740	2.01737	2.53139	2.05348	1.79168	2.18029	1.99704	2.2354	2.35879	2.14863	2.20075	1.98967	2.24761
	Solyc01g065750	1.34708	1.60076	0.928754	1.51491	0.755675	0.54743	0.787537	1.41829	0.647895	1.2922	0.939337	0.951242
	Solyc01g065840	4.22853	4.13082	4.48415	4.38776	4.38355	4.6288	4.56921	4.40996	4.45632	4.28117	4.4667	4.4785
	Solyc01g065930	-4.16498	-4.16498	-4.16498	-4.16498	-4.16498	-4.16498	-3.11525	-4.16498	-2.48133	-4.16498	-4.16498	-3.25385
	Solyc01g065960	-4.16498	-4.16498	-4.16498	-4.16498	-4.16498	-4.16498	-4.16498	-3.19557	-4.16498	-4.16498	-4.16498	-3.84184
	Solyc01g065980	7.40564	7.91053	7.57999	7.46984	7.41804	7.51691	7.94422	8.15273	8.10594	7.63205	7.46827	8.06763
	Solyc01g065983	-4.16498	-4.16498	-3.2421	-4.16498	-4.16498	-4.16498	-4.16498	-4.16498	-3.09034	-3.85735	-4.16498	-3.80677
	Solyc01g065987	-4.16498	-4.16498	-4.16498	-4.16498	-4.16498	-3.15874	-3.11525	-4.16498	-4.16498	-4.16498	-3.82957	-3.81507
	Solyc01g066020	-0.0268016	-0.32181	-0.144369	1.1	0.799989	0.0167033	0.836555	0.729407	0.43375	-0.164327	0.638899	0.666571
	Solyc01g066040	-0.947111	-1.32453	-2.28226	-2.59396	-1.64777	-2.57171	-2.09102	-1.89231	-2.48133	-1.51797	-2.27114	-2.15489
	Solyc01g066050	6.26171	6.05343	6.12987	6.15504	6.16184	5.96016	6.24903	6.18261	6.28772	6.14834	6.09235	6.23979
	Solyc01g066060	2.36399	2.85053	3.02618	2.90168	2.83048	2.65471	2.68683	2.85046	2.57911	2.7469	2.79562	2.70547
	Solyc01g066065	-4.16498	-4.16498	-3.2421	-4.16498	-4.16498	-4.16498	-4.16498	-4.16498	-4.16498	-3.85735	-4.16498	-4.16498
	Solyc01g066070	-4.16498	-4.16498	-4.16498	-4.16498	-4.16498	-4.16498	-4.16498	-4.16498	-3.09034	-4.16498	-4.16498	-3.80677
	Solyc01g066100	-4.16498	-2.55421	-4.16498	-4.16498	-2.22602	-3.15874	-4.16498	-4.16498	-4.16498	-3.62806	-3.18325	-4.16498
	Solyc01g066110	-4.16498	-4.16498	-4.16498	-4.16498	-3.20539	-4.16498	-4.16498	-4.16498	-4.16498	-4.16498	-3.84511	-4.16498
	Solyc01g066160	-3.13782	-4.16498	-4.16498	-2.59396	-1.90854	-4.16498	-2.51409	-4.16498	-4.16498	-3.82259	-2.88916	-3.61468
	Solyc01g066190	-0.794518	-2.13598	-1.9685	-0.599219	-2.22602	-2.15563	-3.11525	-4.16498	-4.16498	-1.633	-1.66029	-3.81507
	Solyc01g066200	-3.13782	-1.54784	-4.16498	-2.18067	-2.22602	-2.57171	-4.16498	-2.62095	-4.16498	-2.95021	-2.32613	-3.6503
	Solyc01g066230	-4.16498	-4.16498	-4.16498	-3.17542	-4.16498	-4.16498	-4.16498	-4.16498	-4.16498	-4.16498	-3.83513	-4.16498
	Solyc01g066235	-4.16498	-4.16498	-4.16498	-4.16498	-4.16498	-4.16498	-4.16498	-2.62095	-4.16498	-4.16498	-4.16498	-3.6503
	Solyc01g066260	-4.16498	-4.16498	-2.28226	-4.16498	-4.16498	-3.15874	-2.09102	-4.16498	-2.48133	-3.53741	-3.82957	-2.91244
	Solyc01g066270	-2.54391	-3.14558	-4.16498	-1.59746	-4.16498	-0.983986	-1.2734	-2.62095	-2.05442	-3.28482	-2.24881	-1.98292
	Solyc01g066290	1.01662	0.959897	-1.13515	1.98428	0.709956	0.306335	0.452265	-0.222882	-0.329626	0.280457	1.00019	-0.0334145
	Solyc01g066297	-4.16498	-3.14558	-4.16498	-4.16498	-4.16498	-4.16498	-4.16498	-4.16498	-4.16498	-3.82518	-4.16498	-4.16498
	Solyc01g066310	5.90421	5.719	6.06247	5.87882	6.01442	6.06056	5.74007	5.77183	5.91122	5.89523	5.9846	5.80771
	Solyc01g066320	-4.16498	-4.16498	-4.16498	-4.16498	-4.16498	-4.16498	-4.16498	-2.62095	-4.16498	-4.16498	-4.16498	-3.6503
	Solyc01g066340	-3.13782	-4.16498	-4.16498	-4.16498	-4.16498	-4.16498	-4.16498	-4.16498	-4.16498	-3.82259	-4.16498	-4.16498
	Solyc01g066360	-3.13782	-4.16498	-1.71094	-3.17542	-1.90826	-1.56964	-4.16498	-4.16498	-3.09034	-3.00458	-2.21777	-3.80677
	Solyc01g066380	-4.16498	-4.16498	-4.16498	-4.16498	-3.20539	-4.16498	-4.16498	-4.16498	-3.09034	-4.16498	-3.84511	-3.80677
	Solyc01g066390	-2.54391	-3.14558	-0.455662	-4.16498	-0.91662	-0.346373	-4.16498	-3.29039	-0.892565	-2.04839	-1.80932	-2.78264
	Solyc01g066420	-1.53502	-0.808326	1.02097	-1.8598	0.563405	0.0169438	-2.09102	-0.744778	0.791739	-0.440792	-0.426482	-0.681352
	Solyc01g066430	5.67179	5.14262	1.20362	3.64704	3.05736	2.22236	4.25895	5.25708	2.50268	4.00601	2.97559	4.00624
	Solyc01g066440	4.27222	4.62501	3.51005	4.06679	3.953	3.77223	4.8365	4.68918	4.85685	4.13576	3.93067	4.79418
	Solyc01g066450	-1.53502	-2.55421	-1.13515	-2.18067	-3.20539	-0.0657994	-4.16498	-4.16498	-1.72541	-1.74146	-1.81729	-3.35179
	Solyc01g066457	1.26386	-1.08439	-0.882865	0.0443889	1.33703	0.0312242	0.567904	-0.309414	0.801521	-0.234463	0.470879	0.353337
	Solyc01g066480	5.18797	5.46409	5.1645	5.28391	5.24301	5.17388	5.45875	5.21828	5.32249	5.27219	5.2336	5.33317
	Solyc01g066490	-4.16498	-3.14558	-4.16498	-4.16498	-4.16498	-2.15563	-4.16498	-2.62095	-2.05442	-3.82518	-3.4952	-2.94678
	Solyc01g066500	-4.16498	-1.81214	-2.68379	-2.59396	-2.63415	-2.57171	-1.49806	-2.21111	-1.03679	-2.88697	-2.59994	-1.58199
	Solyc01g066510	-2.12442	-1.13121	-0.405554	-0.377078	-0.779879	-0.831845	-1.49806	-1.89231	-2.05442	-1.22039	-0.662934	-1.81493
	Solyc01g066520	4.70297	4.56346	4.6075	4.64925	4.52142	4.21375	4.50243	4.51479	4.51163	4.62464	4.46147	4.50962
	Solyc01g066560	-0.5306	-1.32453	-0.984982	-0.861902	-1.64801	-0.453047	-1.76429	-1.89231	-1.03679	-0.946705	-0.987651	-1.56446
	Solyc01g066570	5.77162	5.72526	5.2269	5.61983	5.49156	5.19174	6.21699	6.15888	5.90175	5.5746	5.43438	6.09254
	Solyc01g066590	5.6133	5.78962	5.53269	5.54259	5.76295	5.60234	5.60319	5.93439	5.69299	5.6452	5.63596	5.74352
	Solyc01g066610	1.61577	2.00229	1.38008	2.08112	1.66134	1.16909	2.14099	1.50229	0.930349	1.66605	1.63718	1.52454
	Solyc01g066612	2.66956	2.577	2.88479	2.58237	2.884	3.31404	2.74243	3.06319	2.94692	2.71045	2.9268	2.91751
	Solyc01g066614	2.33115	1.60076	2.37772	2.25725	2.31593	2.36107	1.55831	2.20017	2.06605	2.10321	2.31142	1.94151
	Solyc01g066616	1.04202	0.911271	1.50871	1.12526	1.76444	1.81534	0.993147	1.44018	1.38386	1.154	1.56834	1.2724
	Solyc01g066618	-1.31261	-0.670476	-0.848986	-2.18067	-1.23645	-1.56964	-0.9078	-2.21111	-0.711361	-0.944024	-1.66225	-1.27676
	Solyc01g066620	2.33118	1.51665	1.88814	2.04316	2.29311	1.97657	2.16038	2.00283	1.5627	1.91199	2.10428	1.90864
	Solyc01g066640	5.14143	5.30196	4.44168	5.04771	5.06379	4.76033	5.31001	5.25708	4.93163	4.96169	4.95728	5.16624
	Solyc01g066680	-4.16498	-4.16498	-4.16498	-3.17542	-4.16498	-4.16498	-4.16498	-4.16498	-4.16498	-4.16498	-3.83513	-4.16498
	Solyc01g066690	5.8357	5.81672	5.87255	5.86794	5.75539	5.65642	5.91502	6.08724	5.8677	5.84166	5.75991	5.95665
	Solyc01g066700	-0.0268016	-0.0412223	-0.400314	0.515312	0.341514	0.0947421	0.0974822	-0.0533951	-0.121745	-0.156113	0.317189	-0.0258859
	Solyc01g066710	-0.794518	-1.54784	0.323806	-1.8598	-0.241697	0.0167033	-0.754739	-1.63137	-0.221944	-0.672849	-0.694929	-0.869351
	Solyc01g066720	6.38419	6.58949	6.18334	5.96504	6.17324	6.25154	6.4214	6.7032	6.75039	6.38568	6.12994	6.625
	Solyc01g066730	-0.794518	-0.544656	-1.30277	-0.184621	-0.241697	-0.346064	-0.9078	-1.0499	-0.445998	-0.880649	-0.25746	-0.801232
	Solyc01g066740	6.96619	6.67766	7.03319	6.96	6.9314	6.99791	6.92543	6.86927	6.91639	6.89235	6.9631	6.9037
	Solyc01g066760	-1.79983	-1.81214	-3.2421	-3.17542	-4.16498	-2.15563	-4.16498	-4.16498	-4.16498	-2.28469	-3.16534	-4.16498
	Solyc01g066770	4.79567	4.65484	4.58666	4.90434	4.70741	4.77225	4.7655	4.80396	4.86908	4.67906	4.79467	4.81285
	Solyc01g066790	-4.16498	-4.16498	-4.16498	-4.16498	-3.20539	-3.15874	-4.16498	-2.21111	-2.48133	-4.16498	-3.5097	-2.95247
	Solyc01g066810	-1.31137	-0.670476	1.32363	-4.16498	0.216302	0.654379	-2.09102	-1.0499	1.02082	-0.219405	-1.0981	-0.706698
	Solyc01g066820	1.13538	0.67955	0.890399	0.81472	1.07708	1.05659	1.97578	2.1138	1.70593	0.901777	0.982794	1.93184
	Solyc01g066830	3.83099	3.62826	3.70497	3.54887	3.72492	3.79578	3.93245	3.58724	3.8504	3.72141	3.68986	3.79003
	Solyc01g066840	7.24341	7.50768	7.03897	7.2387	6.96481	7.05226	7.36031	7.48913	7.4849	7.26335	7.08526	7.44478
	Solyc01g066850	1.66925	0.872365	1.70137	-0.184621	0.14937	2.40192	-1.2734	-0.414965	-0.221944	1.41433	0.788891	-0.636769
	Solyc01g066860	3.79552	4.35323	3.75386	3.30155	3.29265	3.83041	2.90935	3.0955	2.9453	3.96753	3.47487	2.98338
	Solyc01g066870	4.12229	3.9767	4.35631	3.86942	4.08869	3.94545	3.75351	3.6252	3.9167	4.15177	3.96786	3.76513
	Solyc01g066880	3.04835	2.82744	2.93491	2.38414	2.83048	3.58888	1.86056	2.23332	2.28265	2.9369	2.9345	2.12551
	Solyc01g066890	-4.16498	-4.16498	-3.2421	-4.16498	-4.16498	-4.16498	-4.16498	-4.16498	-4.16498	-3.85735	-4.16498	-4.16498
	Solyc01g066900	3.21044	3.07297	2.82735	3.01388	2.64857	2.96632	2.88625	3.07735	3.1192	3.03692	2.87625	3.0276
	Solyc01g066910	7.32658	7.36341	5.89645	6.27986	5.34259	6.05691	5.66911	4.70699	4.38536	6.86215	5.89312	4.92049
	Solyc01g066940	3.27223	3.61484	3.66577	3.44352	3.52161	3.64183	3.38356	3.43882	3.59463	3.51761	3.53565	3.47234
	Solyc01g066970	1.41126	1.51665	1.5619	2.08112	1.61248	1.09507	2.54656	2.72788	2.18821	1.4966	1.59622	2.48755
	Solyc01g066990	-4.16498	-4.16498	-2.28226	-2.18067	-3.20539	-2.57171	-4.16498	-4.16498	-4.16498	-3.53741	-2.65259	-4.16498
	Solyc01g067000	4.64695	4.92061	4.20826	4.08559	4.22088	3.9027	4.32486	4.11766	4.37682	4.59194	4.06973	4.27311
	Solyc01g067010	4.26373	3.44321	1.6099	2.44363	2.18029	1.7299	2.81466	2.77367	1.83622	3.10561	2.11794	2.47485
	Solyc01g067020	-2.54391	-4.16498	-3.2421	-2.18067	-3.20539	-2.15563	-4.16498	-3.19557	-3.09034	-3.317	-2.5139	-3.48363
	Solyc01g067030	1.72081	1.33212	1.13966	1.20688	0.964772	1.6286	1.17826	1.72839	1.93261	1.39753	1.26675	1.61309
	Solyc01g067040	0.278646	0.872365	-0.144369	0.458761	1.00319	0.601895	0.929862	0.5304	0.43375	0.335547	0.687948	0.631337
	Solyc01g067070	5.10554	5.35732	5.06684	5.09731	5.1041	5.14894	4.97156	5.20374	5.06518	5.17656	5.11679	5.08016
	Solyc01g067080	3.44721	3.46581	3.29932	3.2065	3.0482	3.3631	3.69797	3.82326	3.68732	3.40412	3.20593	3.73619
	Solyc01g067090	2.98649	2.87326	3.44538	3.32988	3.41879	3.12351	3.40802	3.24114	3.42277	3.10171	3.29073	3.35731
	Solyc01g067100	6.69378	6.46788	6.88771	6.61416	6.66672	6.65238	6.75135	6.68535	6.53417	6.68312	6.64442	6.65695
	Solyc01g067120	-2.12442	-1.13121	-2.28226	-0.0148423	-0.0723553	0.0947421	-1.49806	-0.898593	-3.09034	-1.84596	0.0025148	-1.829
	Solyc01g067130	-2.54391	-1.54784	-0.984982	-1.8598	-1.06769	-1.34695	-3.11525	-0.521534	-0.445998	-1.69224	-1.42481	-1.36093
	Solyc01g067160	-0.207789	-1.13121	-1.30277	-1.37557	-2.22602	-1.34695	-1.2734	-1.0499	-1.45768	-0.88059	-1.64951	-1.26032
	Solyc01g067200	-1.53502	-3.14558	-3.2421	-2.18067	-2.63415	-3.15874	-4.16498	-2.21111	-3.09034	-2.6409	-2.65785	-3.15548
	Solyc01g067210	-0.307577	-1.81127	-0.144369	-1.1824	0.14937	0.754858	0.175762	-0.315729	-0.445998	-0.754407	-0.0927252	-0.195322
	Solyc01g067220	-4.16498	-4.16498	-4.16498	-2.59396	-4.16498	-3.15874	-4.16498	-4.16498	-4.16498	-4.16498	-3.30589	-4.16498
	Solyc01g067230	-3.13782	-3.14558	-1.71094	-1.37557	-2.63415	-2.57171	-1.49806	-4.16498	-3.09034	-2.66478	-2.19381	-2.91779
	Solyc01g067250	-2.12442	-1.81214	-2.28226	-1.59746	-1.4276	-0.568604	-1.76429	-0.761662	-0.329626	-2.07294	-1.19789	-0.951859
	Solyc01g067255	-4.16498	-2.13598	-1.30277	-2.59396	-2.22602	-2.57171	-2.09102	-1.21895	-2.05442	-2.53458	-2.4639	-1.78813
	Solyc01g067270	2.52973	1.57326	2.26461	1.64732	1.77671	2.46205	2.1795	2.46029	2.65169	2.12254	1.96203	2.43049
	Solyc01g067280	4.21511	3.81004	3.71048	3.79714	3.87746	3.86423	4.07217	4.16997	3.86268	3.91188	3.84628	4.03494
	Solyc01g067290	5.90839	6.03044	5.73732	6.25537	5.86873	5.84181	5.54557	5.22447	5.35328	5.89205	5.98863	5.37444
	Solyc01g067295	-1.53502	-0.670476	0.383295	0.569729	1.50949	-0.694228	-0.754739	-0.414965	0.559808	-0.607401	0.461664	-0.203299
	Solyc01g067300	1.97553	1.65422	3.18514	0.768937	2.45429	2.71773	0.0974822	1.70495	0.882894	2.27163	1.98032	0.895108
	Solyc01g067330	1.61577	2.93936	1.46083	3.13612	3.32333	3.08579	3.16101	3.50818	3.18914	2.00532	3.18175	3.28611
	Solyc01g067340	-4.16498	-2.55421	-4.16498	-4.16498	-4.16498	-4.16498	-4.16498	-4.16498	-4.16498	-3.62806	-4.16498	-4.16498
	Solyc01g067360	-1.11777	-0.670476	-0.066854	-1.59746	0.280266	-1.34695	-1.49806	-0.521534	-0.864919	-0.618367	-0.888049	-0.961506
	Solyc01g067370	-1.31137	-1.13121	-1.71094	-3.17542	-1.4276	-4.16498	-4.16498	-3.19557	-3.09034	-1.3845	-2.92267	-3.48363
	Solyc01g067380	3.87732	3.79821	4.26122	3.82537	4.06619	3.65477	4.14682	3.89752	3.64088	3.97892	3.84877	3.89507
	Solyc01g067390	6.65871	6.46411	6.99547	6.7621	6.96679	6.87675	6.75263	6.66499	6.7025	6.70609	6.86854	6.7067
	Solyc01g067400	5.31976	5.40488	5.49521	5.518	5.41427	5.40204	5.45936	5.40693	5.41506	5.40662	5.44477	5.42711
	Solyc01g067410	-3.13782	-3.14558	-4.16498	-4.16498	-2.22673	-3.15874	-4.16498	-4.16498	-2.09832	-3.48279	-3.18349	-3.47609
	Solyc01g067420	-2.54391	-1.81214	-4.16498	-3.17542	-2.22531	-2.57171	-3.11525	-4.16498	-1.6914	-2.84034	-2.65748	-2.99054
	Solyc01g067440	4.10299	3.62157	2.57265	3.42888	3.50163	3.50562	1.86201	2.51523	1.70593	3.4324	3.47871	2.02772
	Solyc01g067443	-4.16498	-2.13598	-4.16498	-3.17542	-4.16498	-4.16498	-3.11525	-4.16498	-3.09034	-3.48865	-3.83513	-3.45686
	Solyc01g067460	3.07831	2.86194	2.81716	2.06227	2.85169	3.34724	0.736794	2.73946	1.18633	2.91914	2.75373	1.5542
	Solyc01g067480	4.71845	4.83637	4.67956	4.6998	4.52142	4.67081	4.81287	4.55462	4.54264	4.7448	4.63068	4.63671
	Solyc01g067490	4.24624	4.32877	4.71886	4.36101	4.26107	4.48492	4.6537	4.71582	4.46808	4.43129	4.369	4.61253
	Solyc01g067500	5.79328	6.01818	5.85207	5.76896	5.84455	5.66763	5.85902	5.75125	5.84312	5.88784	5.76038	5.81779
	Solyc01g067510	4.28101	4.52451	3.46508	4.24039	3.80321	4.14205	4.32486	4.13969	4.21857	4.0902	4.06188	4.22771
	Solyc01g067520	-4.16498	-4.16498	-4.16498	-2.59396	-4.16498	-4.16498	-4.16498	-4.16498	-4.16498	-4.16498	-3.6413	-4.16498
	Solyc01g067530	4.77443	4.50281	4.84168	4.93571	4.98442	4.72396	4.09255	4.07723	3.98571	4.70631	4.88136	4.05183
	Solyc01g067550	6.29437	6.09027	6.41043	6.44798	6.4117	6.63536	6.48315	6.58217	6.51484	6.26502	6.49835	6.52672
	Solyc01g067560	4.86316	4.66137	5.10712	5.08176	5.11079	4.99973	4.80914	4.85011	4.76175	4.87721	5.06409	4.807
	Solyc01g067570	3.26357	3.20423	3.61962	3.17174	3.45389	3.85865	3.53404	3.56136	3.77442	3.36247	3.49476	3.62327
	Solyc01g067580	2.93284	2.99222	2.66643	2.76843	2.83048	3.03721	3.0717	2.87167	2.92202	2.86383	2.8787	2.95513
	Solyc01g067590	5.06368	4.66463	5.03203	5.05965	5.04089	5.15806	5.20879	5.15697	5.02202	4.92011	5.0862	5.12926
	Solyc01g067600	4.84874	4.47337	5.4383	5.14949	5.48954	5.4877	5.18297	5.43001	5.26812	4.92014	5.37558	5.2937
	Solyc01g067620	1.53165	1.45772	1.53729	1.62179	1.14737	2.30676	1.60339	1.23404	1.97846	1.50889	1.69197	1.6053
	Solyc01g067630	4.9495	5.06084	4.92225	5.15394	4.78111	4.69919	4.9743	4.88442	4.72177	4.97753	4.87808	4.86016
	Solyc01g067640	5.1248	5.08781	4.79623	4.94595	4.76443	4.88367	4.95501	4.79566	5.16774	5.00295	4.86468	4.9728
	Solyc01g067660	7.59849	7.41561	7.92258	7.25505	7.84463	7.30289	8.13443	7.91111	7.5572	7.64556	7.46752	7.86758
	Solyc01g067680	5.66866	5.5335	5.54759	5.45433	5.66602	5.31912	5.93273	5.89113	5.46626	5.58325	5.47982	5.76337
	Solyc01g067690	0.471606	0.309958	0.00670807	1.1	0.00540131	0.654379	0.513837	1.21843	1.5833	0.262757	0.586595	1.10519
	Solyc01g067700	2.24575	1.66265	1.65636	2.00417	1.94402	1.99704	1.95373	2.0309	2.34196	1.85492	1.98174	2.10886
	Solyc01g067710	4.58569	4.18632	4.56856	4.12288	4.24112	4.31096	3.90399	4.0953	4.19448	4.44685	4.22499	4.06459
	Solyc01g067720	3.11731	3.08275	3.05247	3.27361	3.43995	3.09531	2.88625	3.36596	3.1695	3.08418	3.26963	3.14057
	Solyc01g067730	8.7487	8.97777	8.6939	8.92894	8.7546	8.73106	8.86328	9.06705	8.95757	8.80679	8.80487	8.96263
	Solyc01g067740	9.37487	9.50181	9.44074	9.25858	9.21131	9.31704	9.5012	9.63769	9.83351	9.43914	9.26231	9.65747
	Solyc01g067750	5.35841	5.30851	5.33348	5.5403	5.18379	5.37375	5.4641	5.41169	5.41297	5.33347	5.36595	5.42959
	Solyc01g067760	-4.16498	-4.16498	-4.16498	-4.16498	-4.16498	-3.15874	-4.16498	-3.19557	-4.16498	-4.16498	-3.82957	-3.84184
	Solyc01g067780	-2.54391	-2.13598	-0.848986	-1.59746	-1.4276	-2.57171	-0.490119	-3.19557	-0.864919	-1.84296	-1.86559	-1.51687
	Solyc01g067790	2.15495	2.3967	3.05247	3.41408	2.30853	2.7781	3.3161	2.95352	2.43848	2.53471	2.83357	2.9027
	Solyc01g067800	4.9386	4.98462	5.13199	5.12016	5.06571	5.15123	5.15425	5.32593	5.30909	5.0184	5.11236	5.26309
	Solyc01g067820	2.85421	3.24836	3.10366	2.98413	2.57397	2.94541	3.2898	3.25734	3.47171	3.06874	2.8345	3.33962
	Solyc01g067830	3.58903	3.83919	3.99887	3.89095	4.03408	4.03725	4.06177	4.04017	3.96307	3.80903	3.98743	4.02167
	Solyc01g067840	-1.53502	-0.428935	-4.16498	-1.59746	-1.90826	-2.15563	-3.11525	-1.89231	-2.48133	-2.04298	-1.88712	-2.4963
	Solyc01g067860	-2.54391	-4.16498	-4.16498	-2.18067	-3.20539	-4.16498	-0.073102	1.13227	1.36964	-3.62462	-3.18368	0.809603
	Solyc01g067880	-4.16498	-3.14558	-4.16498	-4.16498	-2.63415	-4.16498	-3.11525	-4.16498	-4.16498	-3.82518	-3.6547	-3.81507
	Solyc01g067890	8.42761	8.33215	8.5107	8.70209	8.83046	8.66211	8.01093	7.87549	7.62726	8.42349	8.73155	7.8379
	Solyc01g067895	-1.11777	-1.13121	-3.2421	-0.72459	-0.433591	-0.153308	-1.49806	0.0982578	-0.445998	-1.83036	-0.437163	-0.615268
	Solyc01g067900	6.83445	6.78576	6.4622	6.71125	6.48526	6.56321	6.71195	6.70098	6.65374	6.69414	6.58657	6.68889
	Solyc01g067910	-4.16498	-3.14558	-2.68379	-4.16498	-3.20539	-4.16498	-3.11525	-4.16498	-4.16498	-3.33145	-3.84511	-3.81507
	Solyc01g067930	6.94335	6.66242	6.51878	6.75819	6.5844	6.23852	6.61399	6.54057	6.30124	6.70818	6.52703	6.48527
	Solyc01g067940	2.04177	1.30011	1.10999	1.85982	0.804433	1.1752	1.42514	1.68112	1.81276	1.48396	1.27982	1.63967
	Solyc01g067965	-2.12442	-2.55421	-1.9685	-4.16498	-4.16498	-4.16498	-4.16498	-3.19557	-3.09034	-2.21571	-4.16498	-3.48363
	Solyc01g068000	4.78052	5.13088	4.8478	4.97144	5.01584	5.10191	4.87724	4.9705	4.9519	4.91973	5.02973	4.93321
	Solyc01g068020	3.06839	3.47327	3.05247	3.85312	3.43995	3.44732	3.63026	3.38083	3.09857	3.19804	3.58013	3.36989
	Solyc01g068030	4.15546	4.18632	4.06624	4.69369	4.44673	4.31911	4.35461	4.1484	4.10942	4.13601	4.48651	4.20414
	Solyc01g068040	-4.16498	-3.14558	-4.16498	-4.16498	-4.16498	-4.16498	-3.11525	-4.16498	-4.16498	-3.82518	-4.16498	-3.81507
	Solyc01g068045	8.46817	8.63209	8.22004	8.28136	8.11814	8.27145	8.43623	8.55365	8.69929	8.4401	8.22365	8.56306
	Solyc01g068050	3.7466	3.89021	3.78032	3.9048	3.98214	3.95071	3.75895	4.38436	4.24227	3.80571	3.94588	4.12853
	Solyc01g068060	4.34402	4.46591	4.33505	4.41774	4.17584	4.17396	4.48331	4.30862	4.25164	4.38166	4.25585	4.34786
	Solyc01g068070	4.03841	3.8276	4.27697	4.0333	4.2571	4.46582	4.02381	3.91806	3.9167	4.04766	4.25207	3.95285
	Solyc01g068075	-0.794518	0.119478	-0.848986	0.458761	-1.23645	-0.831845	-1.76429	-0.315729	-0.572587	-0.508009	-0.536512	-0.884202
	Solyc01g068080	2.57483	2.02276	1.76635	2.68463	2.57397	1.57515	2.78999	2.28166	2.04465	2.12132	2.27792	2.3721
	Solyc01g068100	7.34841	7.14149	7.66969	7.55848	7.58861	7.56557	7.41721	7.43542	7.5144	7.38653	7.57088	7.45568
	Solyc01g068110	-4.16498	-4.16498	-4.16498	-4.16498	-4.16498	-3.15874	-4.16498	-4.16498	-4.16498	-4.16498	-3.82957	-4.16498
	Solyc01g068120	-3.13782	-1.54784	0.768807	-3.17542	-0.654984	-0.346064	-3.11525	-4.16498	-0.121745	-1.30561	-1.39216	-2.46732
	Solyc01g068130	4.83418	5.25071	4.61046	5.09756	4.86172	4.78408	5.23873	5.3264	5.0587	4.89845	4.91445	5.20794
	Solyc01g068140	0.278646	-0.808326	-0.226287	-1.59746	-1.06769	-1.34695	-2.51409	-1.0499	-1.23194	-0.251989	-1.33737	-1.59864
	Solyc01g068150	3.41212	2.9818	3.1531	3.31402	3.15442	3.46946	3.38349	3.28922	3.3892	3.18234	3.31263	3.35397
	Solyc01g068160	5.19714	5.19767	5.23511	5.01657	4.92311	4.91343	5.17346	5.03772	4.84761	5.20997	4.95104	5.01959
	Solyc01g068170	3.24522	3.3652	3.02618	3.28991	3.2613	3.23971	3.56171	3.65608	3.40609	3.2122	3.26364	3.54129
	Solyc01g068180	2.87712	2.66763	2.87723	2.55572	2.94344	3.04705	2.78999	2.78489	2.83741	2.80733	2.84874	2.8041
	Solyc01g068190	2.98649	2.90669	3.12192	3.35333	3.17139	3.45473	2.9765	3.18294	3.33733	3.00503	3.32648	3.16559
	Solyc01g068200	5.72011	5.7127	5.68361	5.65446	5.60176	5.44922	5.67754	5.50796	5.58222	5.70547	5.56848	5.58924
	Solyc01g068210	5.69617	5.45847	5.87498	5.61821	5.67646	5.69764	5.64345	5.60297	5.69471	5.67654	5.6641	5.64704
	Solyc01g068240	5.19714	5.16019	5.34761	4.96431	4.98694	5.12124	5.06196	5.18053	5.21162	5.23498	5.02416	5.15137
	Solyc01g068250	-1.53502	-2.55421	-1.49247	-2.18067	-1.90826	-1.56964	-1.76429	-1.0499	-0.445998	-1.86057	-1.88619	-1.08673
	Solyc01g068260	3.52521	3.70963	3.9058	3.76834	3.96278	4.15121	3.8808	4.22044	3.98571	3.71355	3.96078	4.02899
	Solyc01g068270	6.28473	6.29056	5.67355	6.30145	5.86425	6.1072	6.26142	6.02583	6.0029	6.08295	6.09097	6.09672
	Solyc01g068280	3.13643	3.42794	3.12033	3.45079	3.48136	2.90266	3.01959	3.13988	2.89835	3.22823	3.27827	3.01927
	Solyc01g068290	3.99194	3.86209	4.23534	3.98906	4.0201	4.17835	3.59769	3.66826	3.80019	4.02979	4.0625	3.68871
	Solyc01g068293	-3.13782	-2.55421	-4.16498	-4.16498	-4.16498	-4.16498	-4.16498	-4.16498	-4.16498	-3.28567	-4.16498	-4.16498
	Solyc01g068297	-4.16498	-4.16498	-4.16498	-4.16498	-2.22602	-4.16498	-4.16498	-4.16498	-4.16498	-4.16498	-3.51866	-4.16498
	Solyc01g068305	-4.16498	-2.13598	-2.72941	-4.16498	-4.16498	-4.16498	-4.16498	-3.19557	-3.09034	-3.01012	-4.16498	-3.48363
	Solyc01g068320	-0.5306	-1.13121	-2.24866	-4.16498	-0.91662	-1.83309	-1.2734	-2.62095	-1.23194	-1.30349	-2.30489	-1.70876
	Solyc01g068330	4.94761	4.87629	5.19306	4.72426	4.87473	4.93491	4.90135	4.93819	4.90516	5.00566	4.84463	4.9149
	Solyc01g068340	0.841338	0.872365	-0.313138	1.06254	-0.0678088	-0.246469	0.175762	0.5304	0.730376	0.466855	0.249422	0.478846
	Solyc01g068350	0.208131	1.19453	0.489752	0.274451	0.396982	0.705021	0.175762	0.0982578	0.730376	0.630804	0.458818	0.334799
	Solyc01g068360	0.587253	0.779176	0.928754	-0.0148423	0.280266	0.705021	0.387947	0.419555	0.498155	0.765061	0.323481	0.435219
	Solyc01g068370	1.69693	1.45772	1.67904	2.00417	1.75436	1.68014	1.28806	1.44684	1.62171	1.61123	1.81289	1.4522
	Solyc01g068380	-1.53502	-2.55421	-1.49247	-2.18067	-1.06769	-1.56964	-2.09102	-0.898593	-4.16498	-1.86057	-1.606	-2.38486
	Solyc01g068390	5.02323	4.97415	5.31326	5.20855	5.20643	5.14207	5.3839	5.15481	5.12504	5.10355	5.18568	5.22125
	Solyc01g068400	5.62886	5.8465	5.61884	5.61104	5.73939	5.81468	5.80723	6.10861	6.02216	5.69806	5.7217	5.97933
	Solyc01g068410	0.208131	2.24813	-1.71094	-0.483877	3.02971	0.0947421	0.320628	-1.41047	1.88521	0.248441	0.880192	0.265121
	Solyc01g068420	-4.16498	-4.16498	-4.16498	-4.16498	-2.22602	-4.16498	-4.16498	-4.16498	-4.16498	-4.16498	-3.51866	-4.16498
	Solyc01g068430	2.59093	5.03588	0.00670807	0.768937	5.65249	2.61554	2.47096	-1.0499	4.5876	2.5445	3.01232	2.00289
	Solyc01g068450	3.17391	3.2996	3.17719	3.33774	3.20473	3.37846	3.28097	3.48083	3.76136	3.2169	3.30698	3.50772
	Solyc01g068460	6.81215	6.47065	7.06686	6.49609	6.84848	6.61294	6.78296	6.81896	6.71695	6.78322	6.6525	6.77296
	Solyc01g068470	3.45081	3.55987	3.64863	3.87484	3.90309	3.62877	3.29857	3.24114	3.49557	3.5531	3.80223	3.34509
	Solyc01g068480	5.77873	5.46237	5.97484	5.88286	5.90673	5.70854	5.79631	5.5696	5.5465	5.73865	5.83271	5.63747
	Solyc01g068490	-1.53502	-2.13598	-2.28226	-2.59396	-1.23627	-2.57171	-2.51409	-2.21111	-1.45768	-1.98442	-2.13398	-2.06096
	Solyc01g068500	1.20945	0.119478	0.850996	0.33854	1.0406	0.891485	0.452265	0.984334	0.783028	0.726643	0.756877	0.739875
	Solyc01g068520	-4.16498	-4.16498	-4.16498	-4.16498	-4.16498	-4.16498	-4.16498	-4.16498	-3.09034	-4.16498	-4.16498	-3.80677
	Solyc01g068530	8.02141	8.09695	7.78132	8.03141	7.88983	7.9934	8.22668	8.36492	8.39584	7.96656	7.97154	8.32915
	Solyc01g068540	1.27991	1.39629	1.13966	0.902144	1.4551	0.490827	1.0175	1.02276	1.02082	1.27195	0.949358	1.02036
	Solyc01g068550	-4.16498	-2.55421	-2.68379	-3.17542	-3.20539	-2.57171	-3.11525	-4.16498	-3.09034	-3.13433	-2.98417	-3.45686
	Solyc01g068560	6.28434	6.45849	6.30863	6.35517	6.29129	6.36709	6.39628	6.39823	6.53128	6.35049	6.33785	6.44193
	Solyc01g068580	4.05357	4.18632	4.09942	3.89095	3.94315	4.21375	4.22714	4.13092	4.34215	4.1131	4.01595	4.2334
	Solyc01g068590	5.32131	5.01814	5.59992	5.50408	5.4878	5.464	5.12948	5.17841	5.18252	5.31313	5.48529	5.16347
	Solyc01g068620	4.04348	3.85069	3.82676	4.06679	3.98214	3.76043	4.04622	3.89234	3.85655	3.90698	3.93646	3.93171
	Solyc01g068630	1.24511	0.193579	-0.144369	-0.0972355	0.456721	0.976396	1.65896	2.24962	2.34075	0.43144	0.445294	2.08311
	Solyc01g068640	3.55392	3.58762	3.8063	3.63433	3.4608	3.57533	3.73975	3.79578	3.57237	3.64928	3.55682	3.70263
	Solyc01g073650	7.50676	7.4796	7.49375	7.36281	7.66584	7.75691	7.51728	7.75547	7.70341	7.49337	7.59519	7.65872
	Solyc01g073660	2.67022	2.44301	2.17014	3.03349	2.8932	2.4022	3.0819	2.69338	2.8123	2.42779	2.7763	2.86253
	Solyc01g073670	-1.31137	-1.54784	-1.71094	-0.599219	-1.23645	-2.57171	-1.07905	-1.63137	-1.23194	-1.52338	-1.46913	-1.31412
	Solyc01g073680	4.88564	5.19992	4.927	4.65016	4.82198	4.77585	4.62608	4.52821	4.94613	5.00419	4.74933	4.70014
	Solyc01g073690	8.08455	8.34392	7.961	8.09591	7.88959	7.75248	8.14708	7.95682	8.06905	8.12982	7.91266	8.05765
	Solyc01g073700	-1.11777	-3.14558	-3.2421	-4.16498	-3.20539	-3.15874	-2.51409	-2.21111	-4.16498	-2.50182	-3.5097	-2.96339
	Solyc01g073710	4.31916	4.41261	4.18468	4.16727	4.07973	3.99717	4.18518	4.16997	4.14444	4.30548	4.08139	4.16653
	Solyc01g073720	-0.414783	-0.670476	-1.71094	-1.8598	-1.90826	-1.34695	-1.49806	-1.0499	-2.48133	-0.932067	-1.705	-1.67643
	Solyc01g073730	4.11267	4.08872	4.28048	3.99406	4.0201	4.00745	4.03051	4.07258	3.81923	4.16062	4.0072	3.97411
	Solyc01g073740	6.40266	6.4519	6.18433	6.30165	6.10625	6.01988	6.44185	6.21513	6.26707	6.3463	6.14259	6.30802
	Solyc01g073750	7.66284	7.35417	8.16943	7.76642	8.02928	7.81012	7.70325	7.65392	7.73506	7.72881	7.86861	7.69741
	Solyc01g073770	4.15546	4.16805	3.95773	3.6407	4.07072	3.85304	3.48435	3.82869	3.83801	4.09375	3.85482	3.71702
	Solyc01g073780	-1.79983	-3.14558	-4.16498	-3.17542	-4.16498	-3.15874	-4.16498	-4.16498	-4.16498	-3.0368	-3.49971	-4.16498
	Solyc01g073820	-4.16498	-4.16498	-4.16498	-4.16498	-2.63415	-4.16498	-4.16498	-4.16498	-3.09034	-4.16498	-3.6547	-3.80677
	Solyc01g073870	4.85453	4.81011	5.11267	4.89625	5.01762	4.95335	4.99334	5.22447	5.10966	4.92577	4.95574	5.10916
	Solyc01g073880	-3.13782	-2.13598	-4.16498	-4.16498	-4.16498	-4.16498	-2.51409	-3.19557	-4.16498	-3.14626	-4.16498	-3.29155
	Solyc01g073890	-1.31137	-1.54784	-2.28226	-1.01367	-1.06769	-2.57171	-2.51409	-0.636608	-1.03679	-1.71382	-1.55102	-1.39583
	Solyc01g073900	3.715	3.46581	3.66008	3.62794	3.50163	3.43986	3.7333	3.7507	3.44745	3.61363	3.52314	3.64382
	Solyc01g073905	-4.16498	-4.16498	-4.16498	-4.16498	-3.20539	-4.16498	-4.16498	-4.16498	-4.16498	-4.16498	-3.84511	-4.16498
	Solyc01g073910	0.133991	0.193579	-1.71094	-0.483877	-1.4276	-0.694228	-2.09102	-1.21895	-2.48133	-0.461124	-0.86857	-1.93043
	Solyc01g073920	3.00741	3.34907	3.39147	3.39144	3.2613	3.17831	3.0819	3.13988	3.07765	3.24932	3.27702	3.09981
	Solyc01g073930	3.16463	3.53158	3.1531	3.16292	3.21295	3.26525	3.20833	3.12229	3.3635	3.2831	3.21371	3.23138
	Solyc01g073940	4.51807	4.75917	4.49058	4.569	4.52472	4.50207	4.74959	4.37325	4.50381	4.58927	4.53193	4.54222
	Solyc01g073950	3.87732	4.24848	4.33861	4.26533	4.15843	4.20498	3.82724	4.10876	4.18961	4.15481	4.20958	4.04187
	Solyc01g073960	5.30237	5.4528	5.25407	5.34348	5.47473	5.40778	5.34273	5.52646	5.51192	5.33641	5.40866	5.46037
	Solyc01g073970	-4.16498	-3.14558	-3.2421	-2.59396	-4.16498	-4.16498	-2.09102	-4.16498	-4.16498	-3.51755	-3.6413	-3.47366
	Solyc01g073980	-4.16498	-4.16498	-4.16498	-4.16498	-3.20539	-4.16498	-4.16498	-4.16498	-4.16498	-4.16498	-3.84511	-4.16498
	Solyc01g073985	0.914734	-0.568713	0.521521	1.04275	1.20258	0.107373	0.707684	1.35687	-0.625407	0.289181	0.784236	0.479715
	Solyc01g074000	5.43522	6.07319	4.33861	5.76828	4.46749	4.75132	6.28243	5.11312	4.97189	5.28234	4.9957	5.45582
	Solyc01g074010	5.67669	5.81015	5.88358	5.93561	5.8219	5.95352	5.75608	5.93813	5.87058	5.79014	5.90368	5.85493
	Solyc01g074020	2.84262	2.91766	2.73296	2.8695	2.92356	2.8586	2.89785	3.02824	2.88636	2.83108	2.88389	2.93748
	Solyc01g074030	7.11521	7.15476	7.11501	7.39527	7.30892	7.07267	6.65474	6.34606	6.48932	7.12833	7.25895	6.4967
	Solyc01g079060	1.93244	1.91737	1.51225	1.74514	1.84174	1.7299	2.16038	1.70495	2.00086	1.78735	1.77226	1.9554
	Solyc01g079080	0.278646	1.15798	0.0767005	0.768937	-0.154543	0.168775	0.684201	-0.135651	-0.121745	0.504442	0.261057	0.142268
	Solyc01g079090	6.62024	6.52548	6.50589	7.03384	6.8109	6.64106	6.39979	6.08724	6.15668	6.55053	6.8286	6.21457
	Solyc01g079100	-0.5306	-0.428935	-0.724712	-2.59396	-1.4276	-0.831845	-4.16498	-2.62095	-1.23194	-0.561416	-1.6178	-2.67262
	Solyc01g079110	4.46822	5.07644	3.67795	5.06202	3.43293	4.00729	5.18294	4.47723	4.26029	4.40754	4.16742	4.64015
	Solyc01g079130	0.345875	-0.808326	-0.984982	-4.16498	-3.20539	-0.453047	-4.16498	-4.16498	-4.16498	-0.482478	-2.6078	-4.16498
	Solyc01g079140	-1.31137	-3.14558	-4.16498	-2.59396	-3.20539	-1.83309	-4.16498	-4.16498	-3.09034	-2.87398	-2.54414	-3.80677
	Solyc01g079150	5.34204	5.08781	5.12787	3.98404	4.64804	6.02861	3.40802	3.94332	4.32462	5.18591	4.88689	3.89199
	Solyc01g079155	-4.16498	-3.14558	-4.16498	-4.16498	-4.16498	-4.16498	-4.16498	-2.62095	-4.16498	-3.82518	-4.16498	-3.6503
	Solyc01g079160	-3.13782	-3.14558	-4.16498	-4.16498	-2.22602	-4.16498	-3.11525	-4.16498	-1.23194	-3.48279	-3.51866	-2.83739
	Solyc01g079170	0.208131	-0.808326	-0.405554	-1.37557	-0.779879	0.753944	0.0147099	-0.521534	-0.221944	-0.33525	-0.467169	-0.242923
	Solyc01g079180	-1.53502	-1.54784	-0.724712	-0.72459	-0.654984	1.09507	-3.11525	-2.62095	-2.48133	-1.26919	-0.0948353	-2.73918
	Solyc01g079200	-4.16498	-4.16498	-4.16498	-3.17542	-2.22602	-4.16498	-4.16498	-2.62095	-4.16498	-4.16498	-3.18881	-3.6503
	Solyc01g079210	4.44713	4.19986	4.20826	4.30597	4.33822	4.40585	4.2363	4.16568	4.23284	4.28508	4.35002	4.21161
	Solyc01g079220	4.0024	4.06818	4.3243	4.35715	4.22088	4.11421	3.95482	3.82326	3.62379	4.13163	4.23075	3.80063
	Solyc01g079230	5.76223	5.6715	6.08594	5.969	5.97107	6.12939	5.95145	5.91534	5.80384	5.83989	6.02315	5.89021
	Solyc01g079240	6.39556	6.62719	6.12084	6.73888	6.40512	6.23509	7.03163	6.89562	6.71218	6.38119	6.4597	6.87981
	Solyc01g079250	8.16064	8.13419	8.22561	8.14891	8.16203	8.14209	8.28827	8.24622	8.19782	8.17348	8.15101	8.2441
	Solyc01g079260	2.09759	1.77981	2.53585	1.7686	1.58741	2.19698	0.0974822	1.50229	1.83622	2.13775	1.851	1.14533
	Solyc01g079285	-4.16498	-3.14558	-4.16498	-4.16498	-4.16498	-4.16498	-4.16498	-4.16498	-4.16498	-3.82518	-4.16498	-4.16498
	Solyc01g079290	-4.16498	-4.16498	-2.68379	-3.17542	-3.20539	-2.57171	-3.11525	-4.16498	-4.16498	-3.67125	-2.98417	-3.81507
	Solyc01g079300	-2.54391	-3.14558	-0.984982	-3.17542	-2.22602	-2.57171	-4.16498	-1.89231	-4.16498	-2.22483	-2.65772	-3.40742
	Solyc01g079310	4.07354	4.01808	3.63129	3.8856	3.88845	3.95071	4.00394	3.6743	4.01902	3.90764	3.90825	3.89909
	Solyc01g079320	2.92187	2.65457	2.59692	2.55572	2.96306	2.93484	2.47096	3.012	2.83741	2.72445	2.81788	2.77346
	Solyc01g079330	5.07664	5.0384	5.25407	5.1029	5.14548	5.08824	5.21041	5.08389	4.90516	5.12303	5.11221	5.06648
	Solyc01g079340	5.67348	5.719	5.70034	5.77039	5.75734	5.66604	5.77771	5.6203	5.78622	5.69761	5.73126	5.72808
	Solyc01g079350	6.53226	6.15661	6.87754	6.23404	6.89761	6.76259	6.38087	6.68983	6.57206	6.52213	6.63141	6.54759
	Solyc01g079360	2.94373	2.82744	2.54822	2.20663	2.88293	2.7781	2.64616	2.76236	3.09857	2.77313	2.62255	2.8357
	Solyc01g079370	-4.16498	-1.32453	-4.16498	-3.17542	-4.16498	-2.57171	-4.16498	-2.21111	-3.09034	-3.21816	-3.30404	-3.15548
	Solyc01g079390	5.6802	5.52635	5.8314	5.63586	5.73041	5.81756	5.77218	5.89217	5.804	5.67931	5.72794	5.82278
	Solyc01g079400	4.30232	4.57043	4.11153	4.4325	4.50812	4.32391	4.7999	4.80291	4.6911	4.32809	4.42151	4.76464
	Solyc01g079410	6.47859	6.76532	5.99473	6.84354	6.49215	6.54393	6.71186	6.89989	6.67407	6.41288	6.62654	6.76194
	Solyc01g079420	6.68081	6.85182	6.42555	6.6398	6.44657	6.65068	6.91466	7.19789	7.1955	6.65273	6.57902	7.10268
	Solyc01g079430	1.49198	1.19453	1.43441	1.69706	1.4551	1.23949	1.42257	1.16699	1.26247	1.37364	1.46388	1.28401
	Solyc01g079450	6.5001	6.40783	6.79965	6.56979	6.59311	6.4686	6.51063	6.46234	6.28006	6.56919	6.54383	6.41767
	Solyc01g079460	-3.13782	-1.54784	-2.68379	-1.59746	-2.63415	-3.15874	-2.51409	-1.41047	-2.48133	-2.45648	-2.46345	-2.1353
	Solyc01g079470	3.44315	4.12136	3.29932	5.34742	5.01996	4.59896	2.78999	2.54194	2.06605	3.62128	4.98878	2.46599
	Solyc01g079480	5.58053	5.3553	4.73477	5.41771	4.94301	5.38855	5.47573	5.70869	5.51766	5.22353	5.24976	5.56736
	Solyc01g079490	4.15546	4.32053	4.34572	4.39196	4.12833	4.2695	4.38788	4.32409	4.39385	4.2739	4.26326	4.36861
	Solyc01g079500	4.32332	4.92333	4.40814	4.81128	4.30548	4.5889	4.881	4.51479	4.5297	4.5516	4.56855	4.64183
	Solyc01g079510	5.38784	5.23105	5.74804	5.5938	5.78929	5.90138	5.7108	5.83393	5.54459	5.45564	5.76149	5.69644
	Solyc01g079520	2.89966	3.41251	3.2772	3.46522	3.16293	3.40964	3.30729	3.05898	3.23711	3.19646	3.34593	3.20113
	Solyc01g079530	0.345875	0.395461	0.810487	0.569729	1.11265	0.753944	0.513837	1.09668	0.43375	0.517274	0.812108	0.681423
	Solyc01g079535	6.9627	7.15141	7.0283	6.97946	7.01964	7.00981	7.13479	7.28643	7.27542	7.04747	7.00297	7.23221
	Solyc01g079550	-1.53502	-3.14558	-1.71094	-1.59746	-4.16498	-2.57171	-3.11525	-3.19557	-3.09034	-2.13052	-2.77805	-3.13372
	Solyc01g079570	1.64276	2.34886	1.5861	1.56934	0.613928	1.27344	0.736794	0.0244231	1.29909	1.85924	1.15224	0.686769
	Solyc01g079580	6.6358	6.75388	5.94617	6.69593	6.29226	6.23547	7.17624	6.72164	6.57112	6.44529	6.40789	6.823
	Solyc01g079590	6.95874	6.85653	6.97995	6.7741	6.84405	6.76856	6.98412	7.03993	6.89795	6.93174	6.79557	6.974
	Solyc01g079600	4.11749	3.76821	3.55365	3.73301	3.79228	3.44732	3.74618	4.28905	3.73487	3.81312	3.65754	3.92337
	Solyc01g079610	4.82832	4.71582	4.62116	4.80562	4.6709	4.78702	4.8365	4.61566	4.59498	4.72176	4.75452	4.68238
	Solyc01g079615	-4.16498	-1.32453	-2.28226	-4.16498	-2.22602	-2.15563	-4.16498	-4.16498	-4.16498	-2.59059	-2.84888	-4.16498
	Solyc01g079620	5.14143	5.15194	5.10083	5.12698	5.27476	5.35524	5.11008	5.55951	5.35111	5.1314	5.25233	5.34023
	Solyc01g079630	2.77104	2.53139	2.51078	2.97408	2.56115	2.73	2.86278	2.56816	2.59392	2.6044	2.75508	2.67495
	Solyc01g079640	3.26357	2.89563	2.99036	3.33774	2.95355	3.34724	3.04066	3.54825	2.92202	3.04985	3.21284	3.17031
	Solyc01g079650	5.42016	5.17355	5.29135	5.41771	5.59928	5.41153	5.35053	5.58542	5.3158	5.29502	5.47617	5.41725
	Solyc01g079660	2.85421	1.82714	-2.28226	0.622169	-1.23645	-1.56964	-2.51409	1.20091	-1.23194	0.799694	-0.727974	-0.848373
	Solyc01g079670	-1.53502	-2.13598	-4.16498	-4.16498	-4.16498	-4.16498	-4.16498	-1.63137	-2.48133	-2.612	-4.16498	-2.75923
	Solyc01g079680	5.7011	5.84074	5.56686	5.57064	5.46739	5.55308	5.61042	5.51808	5.55409	5.7029	5.53037	5.56087
	Solyc01g079690	4.14656	3.63269	4.11599	4.10874	4.16227	4.26528	4.04622	3.90782	3.94506	3.96508	4.17876	3.96637
	Solyc01g079700	0.133991	0.0681639	1.00002	1.20691	0.156	0.490885	1.13972	-0.414965	0.153995	0.400723	0.617933	0.292915
	Solyc01g079710	5.8902	5.83496	5.86515	5.75253	6.03238	6.07754	5.88692	6.05515	5.97626	5.86344	5.95415	5.97278
	Solyc01g079720	4.61324	4.51371	4.66259	4.61637	4.68395	4.55134	4.69747	4.7333	4.8233	4.59651	4.61722	4.75136
	Solyc01g079750	2.91081	2.74359	2.53585	2.92274	2.73099	3.01731	2.28922	2.55511	2.18821	2.73008	2.89034	2.34418
	Solyc01g079760	3.56807	3.8334	3.50371	3.93826	3.73811	3.8915	4.04156	3.80684	4.01352	3.63506	3.85596	3.95397
	Solyc01g079770	2.84262	3.08275	2.49808	2.63443	2.61175	2.33918	2.53176	2.72788	2.45482	2.80782	2.52845	2.57149
	Solyc01g079780	5.50165	5.42232	5.57444	5.62284	5.65862	5.56484	5.62967	5.63278	5.68955	5.49947	5.61544	5.65067
	Solyc01g079790	4.85741	5.00791	4.79047	5.76828	5.51303	5.53045	4.39609	3.98771	3.6804	4.88526	5.60392	4.0214
	Solyc01g079800	2.85421	2.58744	2.79657	3.01388	2.9135	2.62871	2.70014	2.38853	2.5183	2.74607	2.85203	2.53565
	Solyc01g079810	4.42398	4.81599	4.38763	4.86152	4.42213	4.5889	4.51377	4.67719	4.6911	4.54253	4.62418	4.62735
	Solyc01g079820	6.37633	6.45379	6.27315	6.24456	6.19883	6.09538	6.15316	6.21597	6.27857	6.36775	6.17959	6.2159
	Solyc01g079830	-2.54391	-3.14558	-2.68379	-4.16498	-4.16498	-4.16498	-4.16498	-4.16498	-4.16498	-2.79109	-4.16498	-4.16498
	Solyc01g079840	6.09945	6.31128	6.11949	6.0604	6.06258	6.13286	6.17117	6.12967	5.98683	6.17674	6.08528	6.09589
	Solyc01g079850	0.278646	0.730223	-0.504298	-0.277642	-0.540045	-0.453047	-3.11525	-0.898593	-1.72541	0.16819	-0.423578	-1.91309
	Solyc01g079860	5.3926	5.46034	5.36902	5.13377	5.12167	5.07386	5.33569	5.27709	5.14026	5.40732	5.10977	5.25101
	Solyc01g079870	6.87822	6.85653	7.29448	6.69207	7.0975	6.9806	6.95426	7.25651	7.12522	7.00974	6.92339	7.112
	Solyc01g079880	9.19562	9.34191	9.56472	9.19598	9.40781	9.19308	9.52281	9.65109	9.59931	9.36742	9.26562	9.59107
	Solyc01g079920	-4.16498	-4.16498	-4.16498	-4.16498	-3.20539	-4.16498	-4.16498	-4.16498	-4.16498	-4.16498	-3.84511	-4.16498
	Solyc01g079940	-0.794518	-0.960753	-2.68379	-2.18067	-2.22602	-0.983986	-3.11525	-4.16498	-3.09034	-1.47969	-1.79689	-3.45686
	Solyc01g079950	0.278646	1.19453	0.143454	0.943946	-0.334456	0.431913	-1.2734	-0.315729	-0.221944	0.538877	0.347134	-0.60369
	Solyc01g079980	-1.79983	-0.808326	-0.984982	-1.59746	-4.16498	-2.15563	-4.16498	-4.16498	-3.09034	-1.19771	-2.63936	-3.80677
	Solyc01g080000	-0.5306	0.959897	-0.226287	0.622169	1.14737	-0.983986	0.836555	-1.0499	1.1467	0.0676699	0.26185	0.311119
	Solyc01g080010	6.1391	6.04218	6.00566	6.724	6.66905	5.88363	6.4573	6.50556	5.74036	6.06231	6.42556	6.2344
	Solyc01g080020	6.19144	6.24339	5.80069	5.92674	6.40236	5.45293	6.43664	6.31818	5.71178	6.07851	5.92735	6.15554
	Solyc01g080030	-4.16498	-2.55421	-4.16498	-4.16498	-3.20539	-2.57171	-4.16498	-4.16498	-4.16498	-3.62806	-3.31402	-4.16498
	Solyc01g080040	3.04835	3.17709	2.79657	2.94449	2.92355	2.80157	3.4401	3.3049	3.1695	3.00734	2.88987	3.30483
	Solyc01g080070	5.90421	5.83641	5.88821	5.89946	5.76579	5.9216	5.91345	5.85272	5.845	5.87628	5.86229	5.87039
	Solyc01g080075	-4.16498	-4.16498	-4.16498	-4.16498	-3.20539	-4.16498	-4.16498	-4.16498	-4.16498	-4.16498	-3.84511	-4.16498
	Solyc01g080080	4.36037	4.19085	4.69355	4.31794	4.4947	4.55824	4.67743	4.7733	4.52343	4.41492	4.45696	4.65805
	Solyc01g080100	0.41011	1.15798	0.681651	0.721654	1.18127	0.891485	0.175915	0.944853	0.43375	0.749914	0.931469	0.518172
	Solyc01g080110	5.21186	5.21334	5.20998	5.29994	5.19611	4.98955	5.49875	5.24494	5.33797	5.21173	5.16187	5.36055
	Solyc01g080120	-0.947111	-0.428935	-0.313138	-1.1833	-0.654984	-0.568604	-1.2734	-2.21111	-0.864919	-0.563061	-0.802297	-1.44981
	Solyc01g080130	5.88785	5.83641	5.65325	5.85707	5.86425	5.86426	5.97712	6.06899	5.92998	5.7925	5.86186	5.99203
	Solyc01g080140	4.37625	4.55996	4.35982	4.14952	4.05888	4.09535	4.1124	4.13092	4.44784	4.43201	4.10125	4.23039
	Solyc01g080150	0.745005	1.00175	2.56049	1.3691	1.77671	2.8808	0.736794	1.47483	1.88521	1.43575	2.00887	1.36561
	Solyc01g080160	4.08834	4.17333	3.95291	4.23197	3.99649	3.6222	4.1124	3.87669	3.76136	4.07153	3.95022	3.91682
	Solyc01g080170	4.73108	4.50645	4.80858	4.88859	4.81368	5.09815	4.42441	4.58393	4.42731	4.68204	4.93347	4.47855
	Solyc01g080180	2.61627	2.58744	2.15404	2.60867	2.46809	2.46205	2.68683	2.82893	2.95681	2.45258	2.51294	2.82419
	Solyc01g080190	2.61627	2.99222	2.79705	2.78001	2.73099	2.73	3.22684	2.85046	2.78675	2.80185	2.747	2.95468
	Solyc01g080200	4.8904	4.3039	4.77739	4.4002	5.13038	4.78992	4.8604	5.16129	4.85097	4.65723	4.7735	4.95755
	Solyc01g080210	2.48821	2.42774	2.76512	2.63443	2.59926	2.33918	2.64616	2.76236	2.6658	2.56036	2.52429	2.69144
	Solyc01g080220	1.61577	1.80367	2.00044	1.3691	1.79871	1.51965	2.60432	3.24114	2.74754	1.80663	1.56249	2.86433
	Solyc01g080230	-4.16498	-4.16498	-4.16498	-4.16498	-3.20539	-4.16498	-4.16498	-4.16498	-3.09034	-4.16498	-3.84511	-3.80677
	Solyc01g080240	6.76973	6.68992	6.88168	6.77608	6.73608	6.77598	6.79388	6.87321	6.83854	6.78044	6.76271	6.83521
	Solyc01g080250	5.91394	5.63485	6.02743	5.86382	5.85389	5.89185	5.87801	5.96182	5.88888	5.85874	5.86985	5.90957
	Solyc01g080260	0.345875	0.119478	0.268353	0.399902	0.456721	0.705021	-0.073102	-0.414965	0.730376	0.244569	0.520548	0.0807698
	Solyc01g080270	4.99989	5.03839	5.05388	4.90156	5.14183	5.18285	4.8365	4.96311	4.98317	5.03072	5.07541	4.92759
	Solyc01g080280	8.31911	8.35415	8.44607	9.12845	8.83852	8.58357	7.62986	7.17781	7.35824	8.37311	8.85018	7.38863
	Solyc01g080290	1.37953	1.33196	1.63332	1.20688	0.400267	1.27344	1.13972	0.862494	0.976293	1.44827	0.960197	0.992834
	Solyc01g080300	2.68279	2.48788	3.12033	2.67222	2.85169	3.11417	2.45535	2.35879	2.42198	2.76366	2.87936	2.41204
	Solyc01g080310	2.68279	2.55968	2.86739	2.76843	3.00153	2.9559	2.4864	3.23296	2.8123	2.70329	2.90862	2.84389
	Solyc01g080320	-3.13782	-4.16498	-4.16498	-4.16498	-4.16498	-4.16498	-3.11525	-4.16498	-4.16498	-3.82259	-4.16498	-3.81507
	Solyc01g080330	8.01244	8.05365	7.99804	8.00001	8.0224	7.67636	8.11538	8.18017	8.06242	8.02138	7.89959	8.11932
	Solyc01g080340	4.22853	4.44331	4.47122	4.47589	4.45021	4.34329	4.61558	4.70994	4.55769	4.38102	4.42313	4.62774
	Solyc01g080350	4.15546	4.13082	4.0347	3.96895	4.01327	3.80161	4.03051	4.04484	4.08869	4.10699	3.92794	4.05468
	Solyc01g080360	4.39253	3.94487	4.2989	4.14344	4.47092	3.98185	4.1993	3.95827	4.16023	4.2121	4.19874	4.10593
	Solyc01g080370	-4.16498	-4.16498	-4.16498	-4.16498	-4.16498	-2.57171	-3.11525	-4.16498	-3.09034	-4.16498	-3.63389	-3.45686
	Solyc01g080380	-2.54391	-2.13598	-0.984982	-1.37557	-1.23645	-1.56964	-1.49806	-1.21895	-0.445998	-1.88829	-1.39389	-1.05434
	Solyc01g080400	4.22853	4.42804	4.50651	4.54279	4.37618	4.50565	4.28305	4.39539	4.37397	4.38769	4.47487	4.3508
	Solyc01g080410	5.42987	5.23544	5.38915	4.37254	4.40789	6.19619	3.64662	3.61894	4.4761	5.35149	4.9922	3.91388
	Solyc01g080430	5.66163	5.49921	5.64093	5.72363	5.67409	5.60568	5.71584	5.48781	5.5465	5.60059	5.6678	5.58338
	Solyc01g080450	2.94373	2.96074	3.58401	3.35333	3.42588	3.71778	3.0717	3.28922	3.58725	3.16283	3.499	3.31606
	Solyc01g080460	9.13293	8.88865	9.85877	9.29707	9.45409	9.20128	9.53863	9.20528	9.51228	9.29345	9.31748	9.41873
	Solyc01g080470	3.81344	3.74991	3.92015	3.50765	4.00598	3.92957	3.98231	4.14407	3.92843	3.82783	3.8144	4.01827
	Solyc01g080480	0.587253	-0.808326	0.725887	-1.37557	-0.91662	-0.246469	-2.51409	0.235475	-1.03679	0.168271	-0.84622	-1.10513
	Solyc01g080490	-0.794518	0.456931	0.0767005	-2.18067	1.07708	-0.153308	-0.61637	-1.21895	0.295614	-0.0869624	-0.418967	-0.513235
	Solyc01g080500	8.0801	7.82771	7.06164	7.12241	7.09401	6.94088	7.48553	7.64814	7.26655	7.65648	7.05243	7.46674
	Solyc01g080510	3.67651	3.48807	3.92746	3.82537	3.84081	3.57533	3.75895	3.73921	3.64528	3.69735	3.74717	3.71448
	Solyc01g080520	-4.16498	-2.55421	-2.28226	-4.16498	-4.16498	-3.15874	-4.16498	-4.16498	-4.16498	-3.00049	-3.82957	-4.16498
	Solyc01g080530	5.1823	5.31644	5.05822	5.19563	5.04739	4.96379	5.08747	5.10419	4.98317	5.18565	5.06894	5.05828
	Solyc01g080540	4.94674	4.96624	4.58667	4.63109	4.84859	5.06419	4.58391	4.74484	4.75839	4.83322	4.84796	4.69571
	Solyc01g080570	-2.12442	-4.16498	-2.28226	-4.16498	-3.20539	-2.15563	-4.16498	-3.19557	-4.16498	-2.85722	-3.17533	-3.84184
	Solyc01g080580	0.793975	-0.670476	0.207255	0.768937	0.456721	1.40179	0.974346	1.02276	0.43375	0.110251	0.875817	0.810286
	Solyc01g080590	4.71114	4.91788	4.806	4.57898	4.73049	4.6288	4.76266	4.92049	5.02476	4.81167	4.64609	4.90264
	Solyc01g080600	3.75568	4.54589	2.95363	4.35976	2.89319	3.18724	4.59792	3.88193	3.74818	3.75173	3.48007	4.07601
	Solyc01g080610	-4.16498	-3.14558	-4.16498	-3.17542	-4.16498	-4.16498	-3.11525	-3.19557	-4.16498	-3.82518	-3.83513	-3.49193
	Solyc01g080620	5.06118	4.87066	5.15644	4.99408	5.09302	4.91084	4.91277	4.89223	4.85378	5.02943	4.99931	4.88626
	Solyc01g080640	7.31666	7.05717	7.44573	7.39056	7.42508	7.24872	7.11501	6.79557	7.14048	7.27319	7.35478	7.01702
	Solyc01g080660	3.77127	3.81591	3.39832	3.84205	3.66628	3.91351	3.61886	3.93327	3.98571	3.66183	3.80728	3.84595
	Solyc01g080670	6.25782	6.22447	6.41883	6.28204	6.68654	6.53658	6.16396	6.29089	6.18141	6.30038	6.50172	6.21209
	Solyc01g080680	3.78949	5.0999	4.11985	3.01388	4.04018	3.51983	5.34207	5.95811	6.03442	4.33641	3.52463	5.7782
	Solyc01g080690	4.96021	4.96624	5.16042	5.18476	5.16891	4.94448	5.05418	4.99598	5.00827	5.02896	5.09938	5.01948
	Solyc01g080700	4.00778	3.92326	3.99436	4.1848	4.19609	4.24403	4.16868	4.05878	3.80657	3.97513	4.20831	4.01134
	Solyc01g080720	1.61577	1.89534	1.8081	1.7686	2.05789	2.15109	2.06075	1.52923	1.86092	1.77307	1.99253	1.81697
	Solyc01g080740	-3.13782	-2.13598	-4.16498	-4.16498	-2.22602	-3.15874	-4.16498	-2.21111	-4.16498	-3.14626	-3.18325	-3.51369
	Solyc01g080750	1.61577	1.19453	1.00254	0.672769	-0.0723553	-0.346064	0.250012	0.168497	0.0599202	1.27095	0.0847834	0.159477
	Solyc01g080760	3.62331	3.73758	3.88644	3.77993	3.73066	3.77223	3.54705	3.45296	3.48766	3.74911	3.76094	3.49589
	Solyc01g080770	2.89966	2.82744	2.75448	2.91225	2.80896	2.86974	2.6184	2.82893	2.7738	2.8272	2.86365	2.74038
	Solyc01g080780	3.50329	3.15871	3.78555	3.56905	3.57359	3.45393	3.12202	3.41012	3.20852	3.48252	3.53219	3.24688
	Solyc01g080790	-4.16498	-4.16498	-4.16498	-4.16498	-4.16498	-4.16498	-4.16498	-3.19557	-4.16498	-4.16498	-4.16498	-3.84184
	Solyc01g080800	-4.16498	-4.16498	-4.16498	-4.16498	-4.16498	-4.16498	-4.16498	-3.19557	-4.16498	-4.16498	-4.16498	-3.84184
	Solyc01g080810	5.12238	5.05176	5.32949	5.43612	5.27476	5.22031	5.05677	4.78452	4.96049	5.16788	5.3104	4.93393
	Solyc01g080820	-3.13782	-4.16498	-4.16498	-4.16498	-4.16498	-4.16498	-2.51409	-4.16498	-4.16498	-3.82259	-4.16498	-3.61468
	Solyc01g080830	1.97988	2.7921	1.8081	2.57141	2.66063	2.37089	2.90229	2.99582	2.75088	2.19336	2.53431	2.88299
	Solyc01g080840	6.65933	6.56615	7.12124	7.03434	7.00215	6.79144	6.52616	6.26475	6.48609	6.78224	6.94265	6.42567
	Solyc01g080850	5.83006	5.76378	5.96563	5.98525	6.03337	5.93093	6.0566	5.9115	5.84467	5.85316	5.98318	5.93759
	Solyc01g080860	6.21046	6.35128	6.14557	6.19562	6.13357	6.05557	6.3788	6.27704	6.38715	6.23577	6.12825	6.34767
	Solyc01g080870	5.68483	5.32265	6.14109	5.59384	5.5876	5.54094	5.7907	5.4261	5.76837	5.71619	5.57413	5.66172
	Solyc01g080880	6.35795	6.40198	6.55355	6.35956	6.40415	6.47682	6.32614	6.34307	6.45732	6.43783	6.41351	6.37551
	Solyc01g080890	4.02309	4.41261	4.38419	4.11334	4.07072	4.2165	4.45612	5.05636	5.07577	4.27329	4.13352	4.86275
	Solyc01g080900	6.00611	5.9261	5.64093	5.59671	5.35306	5.58724	4.87807	4.51141	4.34215	5.85771	5.51234	4.57721
	Solyc01g080910	6.87822	6.70958	6.96457	6.94948	7.01226	6.39724	7.27176	6.83187	6.83035	6.85079	6.78633	6.97799
	Solyc01g080930	5.95489	5.93691	5.89856	5.82251	5.79478	5.44178	5.98937	5.87521	5.69135	5.93012	5.68635	5.85198
	Solyc01g080940	5.66184	5.48637	5.49199	5.38192	5.5443	5.36512	5.46602	5.51134	5.40879	5.54674	5.43045	5.46205
	Solyc01g080970	-4.16498	-4.16498	-4.16498	-4.16498	-4.16498	-4.16498	-4.16498	-4.16498	-3.09034	-4.16498	-4.16498	-3.80677
	Solyc01g080990	-1.79983	-1.54784	-2.68379	-4.16498	-3.20539	-2.57171	-1.76429	-1.63137	-2.48133	-2.01048	-3.31402	-1.959
	Solyc01g081000	0.887195	2.04295	1.00254	0.943946	0.925307	0.801263	1.10012	1.60717	1.6784	1.31089	0.890172	1.4619
	Solyc01g081010	9.25795	9.38203	9.38338	9.4001	9.33662	9.33183	9.50176	9.61949	9.54817	9.34112	9.35619	9.55647
	Solyc01g081020	-0.5306	-1.54784	-0.984982	-0.483877	-0.433591	-1.15408	-0.754739	-0.636608	-1.45768	-1.02114	-0.690517	-0.949675
	Solyc01g081030	5.32549	5.27864	5.53071	5.18696	5.44139	5.27581	5.29462	5.2611	5.2188	5.37828	5.30139	5.25817
	Solyc01g081040	-0.307577	-0.32181	-1.30277	-1.01367	-1.23645	-0.831845	-0.754739	-0.521534	-1.03679	-0.644053	-1.02732	-0.771021
	Solyc01g081050	4.03841	3.70628	4.59491	4.20644	4.5243	4.66122	4.05142	4.46332	4.20898	4.1132	4.46399	4.24124
	Solyc01g081060	5.57353	5.43591	6.48012	5.80985	6.63343	6.13632	5.30336	6.27903	6.04524	5.82985	6.1932	5.87588
	Solyc01g081070	5.61196	5.30186	5.58671	5.43614	5.41314	5.36118	5.54184	5.47526	5.34017	5.50018	5.40349	5.45242
	Solyc01g081090	-1.53502	-1.54784	-1.71094	-1.59746	-1.90826	-3.15874	-1.76429	-2.62095	-2.05442	-1.59793	-2.22149	-2.14655
	Solyc01g081110	0.0153554	-0.960753	-0.6103	-0.0148423	-0.540045	0.801263	0.320628	0.419555	0.43375	-0.518566	0.0821253	0.391311
	Solyc01g081120	3.06839	2.86194	2.27806	2.81423	2.522	2.38649	3.20833	2.94354	2.97955	2.73613	2.57424	3.04381
	Solyc01g081150	5.25509	5.28943	5.07541	5.44162	5.19818	5.27581	5.30555	5.47715	5.37703	5.20664	5.3052	5.38658
	Solyc01g081160	2.03785	2.19501	2.39226	1.67241	2.64702	2.51977	2.50168	1.60717	2.06605	2.20837	2.27973	2.0583
	Solyc01g081170	0.641776	-0.32181	0.0767005	0.768937	0.668871	0.891485	-0.61637	0.0244231	0.559808	0.132222	0.776431	-0.0107132
	Solyc01g081180	-2.12442	-4.16498	-4.16498	-4.16498	-4.16498	-4.16498	-4.16498	-4.16498	-4.16498	-3.48479	-4.16498	-4.16498
	Solyc01g081185	-4.16498	-4.16498	-4.16498	-2.59396	-4.16498	-4.16498	-4.16498	-4.16498	-4.16498	-4.16498	-3.6413	-4.16498
	Solyc01g081190	3.81937	3.44321	4.08631	3.24045	4.137	3.63531	3.15135	3.46697	3.58725	3.78296	3.67092	3.40186
	Solyc01g081200	4.10784	3.98716	4.07352	4.25706	4.10203	4.01233	3.96239	4.11322	4.008	4.05617	4.12381	4.02787
	Solyc01g081210	-1.53502	-1.81214	-1.49247	-1.8598	-1.64801	-2.57171	-3.11525	-2.62095	-1.72541	-1.61321	-2.0265	-2.48721
	Solyc01g081230	-0.414783	-2.13598	-0.848986	-2.18067	-1.23645	-0.694228	-1.2734	-2.21111	-1.23194	-1.13325	-1.37045	-1.57215
	Solyc01g081240	0.345875	0.0413643	1.38008	1.30638	0.964772	0.989121	1.0594	1.13227	0.67573	0.589107	1.08676	0.955798
	Solyc01g081250	0.471606	3.20423	2.79965	2.32209	3.22925	1.6546	3.7779	2.66852	3.19887	2.1585	2.40198	3.2151
	Solyc01g081270	2.64325	2.57363	3.51013	2.32209	2.90338	2.07612	3.04066	3.57436	3.43105	2.909	2.43386	3.34869
	Solyc01g081290	3.36428	3.44321	3.66577	3.6659	3.83017	3.6222	3.80278	3.87669	3.63815	3.49109	3.70609	3.77254
	Solyc01g081300	3.83115	3.8564	3.80114	3.70897	3.79775	3.85304	3.5834	3.86616	3.57237	3.82956	3.78659	3.67398
	Solyc01g081310	5.03596	4.50645	5.92922	5.14277	5.55565	4.96639	4.84551	5.20372	5.24719	5.15721	5.2216	5.09881
	Solyc01g081320	3.48849	3.16793	3.73233	3.77995	3.73066	4.10009	3.18013	3.50818	3.42277	3.46292	3.87023	3.37036
	Solyc01g081330	2.09759	1.68023	1.70137	1.94364	2.1291	1.93475	1.88549	2.1315	1.86092	1.82639	2.0025	1.9593
	Solyc01g081340	-2.54391	-1.54784	-4.16498	-2.59396	-4.16498	-0.983986	-1.07905	-1.0499	-4.16498	-2.75224	-2.58097	-2.09797
	Solyc01g081350	-4.16498	1.57326	-1.71094	-4.16498	0.662741	-2.15563	0.387947	-4.16498	-0.445998	-1.43422	-1.88596	-1.40768
	Solyc01g081370	-0.114459	2.33255	0.0767005	-0.277642	1.90398	-0.694228	0.736794	-0.0533951	1.73295	0.764931	0.310702	0.805449
	Solyc01g081380	3.81937	3.68717	3.46508	3.89629	3.42588	3.58212	3.85129	3.54825	3.46367	3.65721	3.63476	3.62107
	Solyc01g081390	5.38063	5.21557	4.83406	5.41214	5.18571	5.06564	5.14211	4.79289	4.60599	5.14342	5.22116	4.847
	Solyc01g081400	3.51063	3.61484	2.59667	3.50066	2.90338	3.23971	3.48691	3.63763	3.43105	3.24071	3.21459	3.51853
	Solyc01g081410	1.0573	0.779176	1.13966	1.13652	1.24677	0.37049	0.320628	0.360767	0.498155	0.992046	0.917924	0.393183
	Solyc01g081420	1.18803	0.193579	1.43422	1.09978	1.36947	1.30629	1.50666	1.16699	0.103714	0.938612	1.25851	0.925791
	Solyc01g081430	5.50089	5.14729	5.77066	5.34938	5.52792	5.84852	5.36794	5.59661	5.54931	5.47295	5.57527	5.50462
	Solyc01g081440	3.98141	4.10225	4.33861	4.07873	4.22547	4.42154	4.041	3.99255	4.15507	4.14076	4.24191	4.06288
	Solyc01g081450	5.6201	5.85936	5.41977	5.34869	5.23007	5.7693	5.06605	5.37806	5.43576	5.63308	5.44935	5.29329
	Solyc01g081460	3.1269	2.55968	3.06113	2.97408	2.84112	3.00725	2.83892	2.93349	2.73423	2.91591	2.94082	2.83555
	Solyc01g081470	4.65028	4.73766	4.425	4.59547	4.58928	4.49129	4.66437	4.60304	4.73185	4.60431	4.55868	4.66642
	Solyc01g081480	3.96033	3.77426	4.09476	3.86942	3.62377	4.16484	3.5617	3.66218	4.13496	3.94312	3.88601	3.78628
	Solyc01g081490	4.99466	4.84214	4.90792	5.37444	5.16783	5.06896	4.4756	4.28905	4.39808	4.91491	5.20374	4.38757
	Solyc01g081500	6.21217	6.3452	6.40513	6.35711	6.25928	6.44923	6.44747	6.43855	6.47639	6.32083	6.35521	6.45414
	Solyc01g081510	3.06842	3.12123	3.07137	3.32197	3.42588	3.20703	3.20833	3.16587	3.38069	3.08701	3.31829	3.25163
	Solyc01g081520	5.80318	5.48083	5.75072	5.75004	5.55242	5.69764	5.76087	5.82716	5.77326	5.67824	5.6667	5.7871
	Solyc01g081530	-4.16498	-4.16498	-4.16498	-4.16498	-2.63415	-4.16498	-4.16498	-3.19557	-3.09034	-4.16498	-3.6547	-3.48363
	Solyc01g081540	4.7896	4.865	5.25784	5.10678	5.18987	5.1806	5.33356	5.34501	5.4337	4.97081	5.15909	5.37076
	Solyc01g081560	1.09687	1.45772	1.07273	1.17213	0.456721	1.27344	1.35688	1.07709	1.50118	1.20911	0.967431	1.31172
	Solyc01g081570	6.16493	6.06335	5.75324	6.05844	5.71602	5.8878	5.39434	5.17865	5.33356	5.99384	5.88742	5.30218
	Solyc01g081582	-4.16498	-4.16498	-4.16498	-4.16498	-3.20539	-4.16498	-4.16498	-4.16498	-4.16498	-4.16498	-3.84511	-4.16498
	Solyc01g081584	-4.16498	-4.16498	-4.16498	-3.17542	-4.16498	-4.16498	-4.16498	-4.16498	-4.16498	-4.16498	-3.83513	-4.16498
	Solyc01g081588	-4.16498	-4.16498	-4.16498	-4.16498	-4.16498	-4.16498	-4.16498	-4.16498	-2.05442	-4.16498	-4.16498	-3.46146
	Solyc01g081600	2.22804	1.00175	2.84736	2.04316	2.66063	2.40192	1.35688	2.34369	1.29909	2.02572	2.36857	1.66656
	Solyc01g081605	-4.16498	-2.76713	-4.16498	-2.64213	-4.16498	-4.16498	-4.16498	-4.16498	-2.48133	-3.69903	-3.65736	-3.60376
	Solyc01g081610	3.86592	4.21773	4.41491	4.12701	4.15417	3.91816	4.08731	4.03077	4.1248	4.16619	4.06645	4.08096
	Solyc01g081620	-1.53502	-0.808326	-1.49247	-3.17542	-1.90826	-1.56964	-1.76429	-1.21895	-0.572587	-1.27861	-2.21777	-1.18527
	Solyc01g081630	-3.13782	-4.16498	-3.2421	-4.16498	-4.16498	-4.16498	-4.16498	-4.16498	-1.72541	-3.51496	-4.16498	-3.35179
	Solyc01g081640	-1.11777	-0.544656	-0.848986	-0.483877	0.511049	-0.346064	0.0974822	0.360767	-0.121745	-0.837138	-0.106297	0.112168
	Solyc01g086640	2.68279	2.55968	2.56049	2.36887	2.50871	2.29027	2.45535	2.59391	2.97955	2.60099	2.38928	2.67627
	Solyc01g086650	4.25063	3.94517	4.09898	4.06206	3.85799	4.37491	3.65347	3.76211	4.10942	4.09826	4.09832	3.84166
	Solyc01g086660	-3.13782	-1.32453	-2.28226	-3.17542	-1.4276	-1.56964	-3.11525	-1.63137	-1.45768	-2.2482	-2.05755	-2.0681
	Solyc01g086670	-0.414783	-0.960753	-1.13515	-2.59396	-1.64801	-1.56964	-2.51409	-0.521534	-0.864919	-0.836894	-1.9372	-1.30018
	Solyc01g086680	-1.79983	-1.32453	-1.49247	-3.17542	-2.22602	-1.83309	-0.754739	-2.21111	-1.72541	-1.53895	-2.41151	-1.56376
	Solyc01g086690	1.64276	1.93907	1.10658	2.04316	1.66134	1.6286	2.3411	1.77416	1.73295	1.5628	1.7777	1.9494
	Solyc01g086700	-4.16498	-4.16498	-4.16498	-4.16498	-4.16498	-3.15874	-4.16498	-4.16498	-4.16498	-4.16498	-3.82957	-4.16498
	Solyc01g086710	5.28751	5.26796	5.45305	5.47058	5.33435	5.4877	5.50255	5.38428	5.46626	5.33617	5.43088	5.45103
	Solyc01g086720	0.974755	0.515888	0.928754	0.274451	-0.154543	0.891485	0.250012	-0.521534	0.221247	0.806466	0.337131	-0.0167581
	Solyc01g086730	-2.54391	-2.55421	-2.68379	-2.18067	-3.20539	-4.16498	-4.16498	-4.16498	-4.16498	-2.59397	-3.18368	-4.16498
	Solyc01g086740	5.87321	5.87211	5.82632	5.84199	5.7575	5.83756	5.87877	5.84201	5.96775	5.85721	5.81235	5.89618
	Solyc01g086750	6.88624	6.67686	7.17836	6.96635	6.88571	6.87122	6.9628	6.95626	6.75451	6.91382	6.90776	6.89119
	Solyc01g086760	-4.16498	-2.55421	-4.16498	-3.17542	-3.20539	-2.15563	-3.11525	-3.19557	-2.05442	-3.62806	-2.84548	-2.78841
	Solyc01g086790	-4.16498	-4.16498	-4.16498	-4.16498	-2.63415	-4.16498	-4.16498	-4.16498	-4.16498	-4.16498	-3.6547	-4.16498
	Solyc01g086800	-0.307577	0.515888	-0.226287	-0.72459	-0.433591	0.168775	0.572889	0.862494	0.618933	-0.00599221	-0.329802	0.684772
	Solyc01g086810	5.16369	4.97729	5.27725	5.17057	5.17808	5.45632	5.16288	5.22877	5.18836	5.13941	5.26832	5.19334
	Solyc01g086820	4.42874	4.83343	3.29199	4.89891	3.11987	3.88831	5.3839	4.39171	4.10942	4.18472	3.96903	4.62834
	Solyc01g086840	-4.16498	-3.14558	-1.9685	-4.16498	-4.16498	-4.16498	-4.16498	-4.16498	-4.16498	-3.09302	-4.16498	-4.16498
	Solyc01g086850	4.09812	4.32466	4.02566	4.46516	4.26108	4.13283	4.08731	4.4898	4.07288	4.14948	4.28636	4.21666
	Solyc01g086860	4.97724	5.22664	4.99636	4.85849	4.9868	4.91891	5.22038	5.3843	5.25885	5.06675	4.9214	5.28785
	Solyc01g086870	5.84917	5.97287	5.67951	5.39372	5.80377	5.33089	5.83741	6.12195	5.90297	5.83385	5.50946	5.95411
	Solyc01g086890	6.86959	6.86647	7.14425	6.91432	7.00634	7.18421	7.03999	7.13788	7.17553	6.9601	7.03495	7.1178
	Solyc01g086900	4.24624	4.46591	4.11153	4.36123	4.27683	4.20058	4.20864	4.15274	4.06227	4.27456	4.27954	4.14122
	Solyc01g086920	8.86911	8.86179	8.73766	9.08139	8.81167	8.63902	9.41563	9.23691	9.12136	8.82285	8.84403	9.25797
	Solyc01g086930	0.745005	0.826522	0.810487	1.17213	0.563405	0.84708	1.51581	1.32911	0.43375	0.794005	0.860871	1.09289
	Solyc01g086940	3.83115	3.81591	4.20042	3.89095	3.88263	3.98697	3.82724	3.88857	3.72818	3.94916	3.92018	3.81466
	Solyc01g086950	4.20156	4.44331	4.50653	4.33531	4.55088	4.69641	4.35461	4.80396	4.52329	4.3838	4.52753	4.56062
	Solyc01g086960	8.07314	7.66435	6.80347	6.73145	6.78514	6.7596	7.12586	7.33448	6.93993	7.51365	6.75873	7.13342
	Solyc01g086970	8.20069	8.05955	8.5004	8.03903	8.40395	8.27566	8.33942	8.6477	8.68083	8.25355	8.23955	8.55598
	Solyc01g086980	4.7591	4.5388	4.88139	4.68476	4.72475	4.89457	5.03331	5.0021	4.7551	4.72643	4.76803	4.93017
	Solyc01g086990	5.48135	5.50661	5.55924	5.48619	5.62843	5.53745	5.51002	5.47888	5.24953	5.51574	5.55069	5.41281
	Solyc01g087000	-1.31137	-0.128825	-0.066854	-1.37557	-0.654984	-0.831845	-0.266595	-0.898593	-0.572587	-0.502348	-0.954134	-0.579258
	Solyc01g087005	-1.79983	-2.55421	-1.71094	-4.16498	-2.63415	-1.83309	-3.11525	-1.63137	-1.23194	-2.02166	-2.8774	-1.99285
	Solyc01g087010	-4.16498	-4.16498	-4.16498	-3.17542	-4.16498	-4.16498	-4.16498	-4.16498	-4.16498	-4.16498	-3.83513	-4.16498
	Solyc01g087015	-3.13782	-4.16498	-4.16498	-1.59746	-2.22602	-2.57171	-2.51409	-3.19557	-2.05442	-3.82259	-2.13173	-2.58803
	Solyc01g087020	5.09333	5.03906	3.43209	5.09045	4.34036	3.88634	4.54729	4.82042	3.9108	4.52149	4.43905	4.42617
	Solyc01g087030	5.42989	5.27224	6.00073	5.20426	6.06376	5.74227	5.53818	5.75908	5.71687	5.56762	5.6701	5.67137
	Solyc01g087040	3.86592	4.02317	3.81144	4.60852	4.62666	4.37491	3.25416	3.02152	2.53013	3.90018	4.5367	2.93527
	Solyc01g087050	-0.207789	-0.670476	-1.13515	-1.59746	-2.22602	-0.831845	-4.16498	-2.62095	-4.16498	-0.671137	-1.55178	-3.6503
	Solyc01g087060	0.278646	-0.808326	-0.313138	-0.184621	-0.0723553	0.654379	-1.49806	-1.21895	-0.864919	-0.280939	0.132468	-1.19398
	Solyc01g087070	2.29762	2.33255	2.08778	1.88046	2.45429	2.50556	1.9086	2.28166	2.26425	2.23932	2.2801	2.1515
	Solyc01g087080	-0.656533	-0.808326	-0.724712	-0.377078	-1.06769	-0.983986	-1.49806	-1.0499	-1.72541	-0.729857	-0.809585	-1.42446
	Solyc01g087090	4.41023	4.38915	4.14948	4.15398	4.22088	3.93488	4.34193	4.50123	4.24696	4.31629	4.10325	4.36338
	Solyc01g087095	-1.79983	-2.55421	-2.68379	-1.8598	-1.4276	-3.15874	-2.09102	-3.19557	-3.09034	-2.34594	-2.14871	-2.79231
	Solyc01g087120	8.01909	8.04972	7.95756	8.09763	7.90726	7.77481	8.16805	8.04633	8.06857	8.00879	7.92657	8.09432
	Solyc01g087130	-1.11777	-0.808326	-1.30277	-1.37557	-2.22602	-1.15408	-4.16498	-1.89231	-1.45768	-1.07629	-1.58523	-2.50499
	Solyc01g087140	0.641776	1.29893	0.00670807	1.4292	0.456721	0.976396	0.684201	0.29948	0.498155	0.649139	0.954106	0.493946
	Solyc01g087150	0.587253	2.00229	0.143454	-0.0972355	2.36861	0.753944	0.836555	0.819481	1.78551	0.911	1.00844	1.14718
	Solyc01g087160	1.75036	1.33405	1.80983	1.62616	1.73369	1.97923	2.20154	2.08107	2.46092	1.63142	1.7797	2.24785
	Solyc01g087170	7.36283	6.94683	7.51745	7.31027	7.35012	7.36695	7.30401	7.39297	7.38924	7.2757	7.34245	7.36207
	Solyc01g087180	-3.13782	-2.55421	0.540172	-3.17542	-2.22602	-1.15408	-2.51409	-1.63137	-3.09034	-1.71729	-2.18518	-2.41193
	Solyc01g087190	3.64349	3.53158	3.61962	3.70897	3.85265	3.98185	3.41611	3.6252	3.42277	3.59823	3.84782	3.48803
	Solyc01g087200	2.94373	2.64139	2.92545	2.92274	3.23733	3.04705	2.45535	2.50169	2.52815	2.83686	3.06904	2.49507
	Solyc01g087210	9.65658	9.53102	9.84935	9.81508	9.75249	9.53126	9.72282	9.50573	9.59153	9.67898	9.69961	9.60669
	Solyc01g087230	4.24183	4.12136	4.05197	4.32587	4.06619	4.26528	3.94926	4.07258	4.10942	4.13838	4.21911	4.04375
	Solyc01g087240	5.13917	5.0999	4.62033	5.05956	5.14794	5.00226	5.46603	5.40807	5.47429	4.95313	5.06992	5.44946
	Solyc01g087250	5.11758	5.12616	5.20998	5.07349	4.86954	4.87268	5.29023	4.89999	5.07049	5.15124	4.93857	5.0869
	Solyc01g087260	7.9791	8.04336	8.25211	7.81458	7.97707	7.78829	8.05542	7.87254	8.02355	8.09152	7.85998	7.98384
	Solyc01g087270	-2.53711	-2.12874	-2.68379	0.66304	-0.144094	0.240705	-4.16498	-4.16498	-2.48133	-2.44988	0.253217	-3.60376
	Solyc01g087290	4.42009	4.26576	4.61343	4.70892	4.84859	4.89729	4.47172	4.58067	4.59498	4.43309	4.81827	4.54913
	Solyc01g087300	3.97612	4.18177	4.11985	4.0949	4.0302	4.14664	4.14195	4.1785	4.3509	4.09258	4.09058	4.22378
	Solyc01g087320	4.17408	3.97145	4.37379	4.06206	4.40561	4.56168	4.29516	4.46332	4.51941	4.17311	4.34312	4.42597
	Solyc01g087330	1.97553	1.75555	2.51078	2.00417	2.39774	2.4912	1.95373	2.69256	2.43848	2.08062	2.2977	2.36159
	Solyc01g087340	-2.12442	-1.81214	-1.13515	-1.1833	-1.06769	-0.831845	-0.754739	-1.21895	-0.329626	-1.69057	-1.02761	-0.767771
	Solyc01g087350	-1.79983	-1.81214	-0.848986	-4.16498	-2.22602	-2.57171	-1.07905	-4.16498	-4.16498	-1.48699	-2.98757	-3.13634
	Solyc01g087360	-2.12442	-2.55421	-1.9685	-3.17542	-2.22602	-1.83309	-4.16498	-1.21895	-2.48133	-2.21571	-2.41151	-2.62175
	Solyc01g087370	2.72179	2.49142	3.17241	2.71248	3.02981	3.15761	2.74921	3.60808	3.27617	2.79521	2.96663	3.21115
	Solyc01g087390	1.79466	1.23028	2.02278	1.61016	1.84181	2.10424	1.46839	2.24916	1.66098	1.68258	1.85207	1.79284
	Solyc01g087400	3.79887	3.47327	4.07152	3.71643	4.19207	4.42108	4.03051	4.25606	4.23094	3.78122	4.10986	4.1725
	Solyc01g087410	3.13125	2.37706	2.98445	2.57642	3.04809	3.35373	2.67045	2.80741	3.06523	2.83092	2.99275	2.8477
	Solyc01g087420	3.19229	2.73121	3.28461	2.96396	3.35527	3.56165	3.0717	3.19981	3.43105	3.06937	3.29363	3.23418
	Solyc01g087430	4.82243	4.62166	4.91271	4.75368	4.92539	5.03727	5.03594	4.92303	4.8005	4.7856	4.90545	4.91982
	Solyc01g087440	0.406335	0.57253	0.0967159	0.721654	1.30942	0.654379	0.0513839	0.419555	0.67573	0.358527	0.895152	0.382223
	Solyc01g087450	3.03883	3.48807	3.21419	3.46522	3.56077	3.48403	3.16642	3.12229	2.89835	3.24703	3.50334	3.06235
	Solyc01g087470	4.74982	4.60478	4.84162	4.71244	4.86694	4.83328	4.5908	5.02594	4.8005	4.73207	4.80422	4.80575
	Solyc01g087490	5.5369	5.27651	5.47751	5.50583	5.77132	5.76483	5.49684	5.56766	5.49417	5.43031	5.68066	5.51956
	Solyc01g087500	2.09759	2.15847	2.08778	1.51491	1.7086	1.23949	0.736794	0.904261	1.36964	2.11461	1.48766	1.00357
	Solyc01g087520	6.11762	6.21671	5.89219	6.47403	6.19607	5.87121	6.12503	5.89606	5.76674	6.07551	6.18044	5.92928
	Solyc01g087530	4.7591	4.62166	4.76684	4.75383	4.62381	4.74338	4.73351	4.70404	4.60963	4.71587	4.70701	4.68239
	Solyc01g087540	5.79117	5.91381	4.99202	5.64382	4.82198	4.86425	5.25008	4.69812	4.61336	5.56566	5.11002	4.85385
	Solyc01g087550	4.9028	4.61493	4.72386	4.76247	4.80032	4.80459	4.68749	5.01168	5.11737	4.7472	4.78913	4.93885
	Solyc01g087560	5.86041	5.8945	5.94857	5.7013	5.86823	6.01111	5.82386	6.12416	6.17157	5.90116	5.86021	6.03986
	Solyc01g087570	4.73459	4.75612	3.71598	4.02147	3.46202	4.17386	3.89244	4.31582	4.3245	4.40223	3.88579	4.17759
	Solyc01g087580	1.74592	0.264059	-1.71094	0.137044	-2.63415	-1.34695	-0.073102	0.682169	-1.23194	0.0996779	-1.28135	-0.207624
	Solyc01g087590	1.24511	2.29938	1.00254	2.23693	0.843237	1.27344	1.35688	1.44684	1.36964	1.51567	1.4512	1.39112
	Solyc01g087600	5.7201	5.6755	5.77329	5.70738	5.69417	5.7362	5.6708	5.77041	5.62611	5.72296	5.71259	5.68911
	Solyc01g087610	4.78483	4.64825	4.57764	4.89358	4.57416	4.55134	4.76237	4.6375	4.40229	4.67024	4.67303	4.60072
	Solyc01g087620	6.86896	7.01045	6.86746	6.88798	6.77198	6.88233	6.95954	7.22513	7.02911	6.91563	6.84743	7.07126
	Solyc01g087630	-3.13782	-4.16498	-4.16498	-3.17542	-4.16498	-2.57171	-4.16498	-3.19557	-1.72541	-3.82259	-3.30404	-3.02865
	Solyc01g087640	4.89168	5.04841	5.04736	5.03568	5.13058	5.09537	5.09839	4.98517	4.91757	4.99582	5.08721	5.00037
	Solyc01g087650	5.46432	5.56351	5.55463	5.61984	5.51487	5.42299	5.61218	5.50802	5.4357	5.52748	5.51923	5.51864
	Solyc01g087660	-2.54391	-4.16498	-1.30277	-3.17542	-1.90826	-0.983986	-2.51409	-0.414965	-1.72541	-2.67055	-2.02255	-1.55149
	Solyc01g087670	5.42987	5.39314	5.65724	5.61982	5.59081	5.54268	5.65615	5.5982	5.5503	5.49342	5.58444	5.60155
	Solyc01g087680	4.31496	4.55294	4.47446	4.86559	4.80337	4.22681	4.71396	4.27319	3.92258	4.44745	4.63192	4.30325
	Solyc01g087690	-4.16498	-3.14558	-4.16498	-0.0972355	-1.06769	-0.153308	-2.51409	-4.16498	-4.16498	-3.82518	-0.439412	-3.61468
	Solyc01g087700	-4.16498	-4.16498	-4.16498	-4.16498	-4.16498	-4.16498	-4.16498	-3.19557	-4.16498	-4.16498	-4.16498	-3.84184
	Solyc01g087710	-1.11777	0.193579	-0.504298	-0.0148423	0.216302	-0.346064	0.452265	-0.521534	0.142838	-0.476164	-0.0482014	0.0245228
	Solyc01g087720	5.15555	4.97168	5.42539	5.26736	5.44663	5.30688	5.29681	5.40625	5.08407	5.1842	5.34029	5.26238
	Solyc01g087730	7.63366	7.62562	8.02309	7.79771	8.1598	7.95806	7.15972	7.24792	7.25203	7.76079	7.97186	7.21989
	Solyc01g087740	-2.54391	-2.13598	-4.16498	-3.17542	-4.16498	-2.15563	-3.11525	-2.62095	-3.09034	-2.94829	-3.16534	-2.94218
	Solyc01g087750	2.39606	2.60114	2.33629	3.99404	3.53478	3.44732	2.06075	0.775147	1.26247	2.4445	3.65871	1.36612
	Solyc01g087770	-2.54391	-4.16498	-2.68379	-3.17542	-2.63415	-3.15874	-4.16498	-4.16498	-3.09034	-3.13089	-2.98944	-3.80677
	Solyc01g087780	-2.58991	-2.55421	-2.68379	0.514868	0.511049	0.0943622	-2.09065	-4.16498	-4.16498	-2.60931	0.373426	-3.47354
	Solyc01g087790	1.72316	-0.544656	0.681651	1.0244	1.27844	0.432214	1.51578	0.729407	0.882894	0.620053	0.911682	1.04269
	Solyc01g087800	1.17289	-3.14558	2.18606	-0.861902	0.456721	0.168775	-2.51409	-0.135651	-0.0280548	0.0711224	-0.0788017	-0.892597
	Solyc01g087810	0.530588	-1.32453	-0.504298	-0.72459	0.14937	-1.15408	-2.51409	-1.89231	-2.48133	-0.432748	-0.576434	-2.29591
	Solyc01g087820	4.42009	4.01808	4.1864	4.06635	4.14862	3.5956	4.44688	4.0953	4.2794	4.20819	3.93686	4.27386
	Solyc01g087840	-1.53502	-0.960753	-0.984982	-4.16498	-1.64801	-2.15563	-1.07905	-2.21111	-2.48133	-1.16025	-2.65621	-1.92383
	Solyc01g087850	6.29622	6.29979	6.07208	6.1979	6.26589	5.7786	6.14624	5.78446	5.50987	6.2227	6.0808	5.81352
	Solyc01g087860	1.31388	1.29893	-0.066854	1.30638	0.842983	0.938084	1.0175	1.50229	1.36964	0.848654	1.02915	1.29648
	Solyc01g087870	3.09794	3.21317	3.04564	2.78001	2.76492	2.8586	2.73933	2.61921	2.95681	3.11892	2.80118	2.77178
	Solyc01g087880	3.02802	3.01283	2.66643	2.68461	3.11111	3.10477	2.82684	3.33575	3.17936	2.90243	2.96683	3.11398
	Solyc01g087890	4.25063	4.06818	4.36683	3.84173	4.43273	4.23113	4.40829	4.35172	4.41486	4.22855	4.16853	4.39162
	Solyc01g087900	6.58578	6.60922	6.53101	6.49619	6.38984	6.58807	6.5848	6.84198	7.03313	6.57534	6.49137	6.81997
	Solyc01g087910	3.96547	3.9178	4.0563	3.96391	4.20037	4.17835	4.13217	4.17424	4.16503	3.97986	4.11421	4.15715
	Solyc01g087920	-2.54391	0.119478	-4.16498	-4.16498	0.158521	-4.16498	-4.16498	-4.16498	-1.45768	-2.19647	-2.72381	-3.26255
	Solyc01g087940	-4.16498	-2.55421	-4.16498	-4.16498	-1.06769	-4.16498	-4.16498	-4.16498	-4.16498	-3.62806	-3.13255	-4.16498
	Solyc01g087950	-0.414783	0.67955	-3.2421	-1.59746	1.82303	-0.831845	-2.09102	-4.16498	0.142838	-0.992445	-0.202092	-2.03772
	Solyc01g087970	0.793975	0.826522	0.850996	1.30638	1.00319	1.6286	0.387947	-0.414965	0.295614	0.823831	1.31272	0.0895321
	Solyc01g087980	4.16014	3.11171	1.8081	1.62179	1.7086	1.70523	2.73933	2.97328	1.86092	3.02665	1.67854	2.52451
	Solyc01g087990	3.53244	3.62826	3.32814	3.04302	3.83017	3.84742	3.122	3.51494	3.37755	3.49628	3.57354	3.33816
	Solyc01g088000	5.50374	5.46783	5.56686	5.53043	5.60142	5.39629	5.38596	5.57414	5.58593	5.51281	5.50938	5.51534
	Solyc01g088010	-4.16498	-2.55421	-2.68379	-3.17542	-2.63415	-2.15563	-3.11525	-2.62095	-4.16498	-3.13433	-2.65507	-3.30039
	Solyc01g088020	7.52455	7.43429	7.77036	7.66388	7.57045	7.48584	7.65938	7.44967	7.49873	7.5764	7.57339	7.53592
	Solyc01g088030	0.887195	0.395461	0.850996	1.27397	0.964772	1.01705	0.883963	0.984334	0.618933	0.711217	1.08526	0.829077
	Solyc01g088040	5.79418	6.0028	5.48788	5.62449	5.4167	5.54789	5.8564	5.59779	5.9127	5.76162	5.52969	5.78896
	Solyc01g088050	2.15495	1.75555	1.38008	1.4292	1.39858	2.38649	1.25238	1.32911	1.6784	1.76353	1.73809	1.41996
	Solyc01g088060	2.36399	2.36498	2.78616	2.44363	2.90338	2.78988	2.45535	2.37374	2.76073	2.50504	2.7123	2.52994
	Solyc01g088080	6.84447	6.75235	6.78607	6.8232	6.70655	6.68397	6.99128	6.86736	6.85345	6.7943	6.73791	6.90403
	Solyc01g088090	5.45483	5.39268	5.92528	5.49883	5.61987	5.37297	5.33569	5.16558	5.31934	5.59093	5.49722	5.27354
	Solyc01g088100	6.56146	6.26859	6.76025	6.36964	6.53146	6.66604	6.20665	6.30557	6.42036	6.5301	6.52238	6.31086
	Solyc01g088140	3.33149	3.35716	3.41564	3.32988	3.37618	3.5956	3.38342	3.6743	3.71469	3.36809	3.43389	3.5908
	Solyc01g088150	3.53964	3.58762	3.5289	3.65336	3.51498	3.58212	3.43292	3.58081	3.57983	3.55205	3.58349	3.53119
	Solyc01g088160	3.73411	3.48807	2.58471	3.28178	2.81976	3.11417	1.9086	1.52923	0.833825	3.26896	3.07191	1.42388
	Solyc01g088170	5.10286	4.94762	5.39769	5.17823	5.25517	5.08809	5.11753	5.0212	4.84142	5.14939	5.17383	4.99338
	Solyc01g088200	-0.794518	-0.428935	-1.34315	-0.428102	-1.1402	0.37049	-2.91243	-0.898593	0.0599202	-0.855534	-0.39927	-1.25037
	Solyc01g088220	-4.16498	-4.16498	-2.68379	-3.17542	-2.63415	-4.16498	-2.10428	-1.89231	-4.16498	-3.67125	-3.32485	-2.72052
	Solyc01g088230	-4.16498	-4.16498	-0.950737	-2.3775	-1.33959	-4.16498	-2.18808	-4.16498	-4.16498	-3.09356	-2.62736	-3.50601
	Solyc01g088240	4.6993	4.53265	4.49697	4.58091	4.57978	4.63207	4.7937	4.85011	4.76822	4.57631	4.59759	4.80401
	Solyc01g088250	5.05617	5.12142	5.90463	5.08088	5.47946	5.52164	4.79363	5.34311	5.48426	5.36074	5.36066	5.207
	Solyc01g088310	4.06857	4.35323	3.83183	4.3974	4.20449	3.77223	4.04683	3.82869	4.05157	4.08454	4.12471	3.9757
	Solyc01g088320	-3.13782	-4.16498	-2.28226	-2.18067	-1.4276	-2.57171	-4.16498	-1.21895	-1.45768	-3.19502	-2.05999	-2.28054
	Solyc01g088330	-2.12442	-4.16498	-2.68379	-2.18067	-2.63415	-4.16498	-1.07905	-2.21111	-3.09034	-2.99106	-2.99327	-2.12683
	Solyc01g088340	-2.54391	-3.14558	-2.28226	-4.16498	-4.16498	-2.57171	-2.09102	-2.62095	-4.16498	-2.65725	-3.63389	-2.95898
	Solyc01g088350	4.19929	4.32565	4.02552	4.28985	4.02944	4.14205	4.29448	4.39172	4.40649	4.18349	4.15378	4.36423
	Solyc01g088360	-2.54391	-4.16498	-4.16498	-4.16498	-4.16498	-3.15874	-3.11525	-3.19557	-4.16498	-3.62462	-3.82957	-3.49193
	Solyc01g088370	7.64134	7.51916	7.75926	7.64813	7.56197	7.51951	7.62702	7.5942	7.63345	7.63992	7.57654	7.61822
	Solyc01g088380	1.64276	1.60076	1.72335	2.2237	1.98298	2.15109	2.32401	2.18331	1.90909	1.65562	2.11926	2.1388
	Solyc01g088390	2.3145	2.89563	2.24804	3.03337	2.19695	2.54779	2.80238	2.51523	2.73423	2.48606	2.5927	2.68395
	Solyc01g088395	-3.13782	-4.16498	-4.16498	-4.16498	-4.16498	-4.16498	-4.16498	-4.16498	-4.16498	-3.82259	-4.16498	-4.16498
	Solyc01g088400	5.67015	5.73792	4.79566	5.93042	5.55582	5.8118	5.51145	5.60094	5.23307	5.40125	5.76601	5.44849
	Solyc01g088410	-4.16498	-3.14558	-3.2421	-3.17542	-4.16498	-2.57171	-4.16498	-4.16498	-3.09034	-3.51755	-3.30404	-3.80677
	Solyc01g088430	-4.16498	-3.14558	-4.16498	-2.18067	-1.64801	-4.16498	-3.11525	-2.62095	-2.48133	-3.82518	-2.66455	-2.73918
	Solyc01g088440	3.0584	2.90669	1.96397	2.47248	2.36861	2.27359	2.50168	2.91317	2.66578	2.64302	2.37156	2.69355
	Solyc01g088450	1.86529	2.02276	1.48677	1.65409	1.63711	1.6546	2.03997	1.96386	1.50118	1.79161	1.6486	1.835
	Solyc01g088460	1.51299	1.48073	1.44087	2.05066	1.48247	1.31375	1.10405	1.11622	0.952171	1.4782	1.61563	1.05748
	Solyc01g088470	3.47835	3.4297	3.2146	3.83434	3.50834	3.71025	3.31511	3.35436	3.34198	3.37421	3.68431	3.33715
	Solyc01g088480	6.31192	6.58607	6.08695	6.30138	6.01164	6.14323	6.39627	6.25299	6.49525	6.32831	6.15208	6.38151
	Solyc01g088490	-0.5306	-0.670476	-0.984982	-1.1833	-0.334456	-0.983986	-0.754739	-0.414965	-1.45768	-0.728686	-0.833915	-0.875795
	Solyc01g088500	-2.54391	-3.14558	-1.13515	-3.17542	-4.16498	0.0167033	-4.16498	-2.62095	-0.864919	-2.27488	-2.44123	-2.55028
	Solyc01g088520	2.99699	2.74359	2.84751	2.97408	2.54822	1.97657	2.96552	2.41766	2.57911	2.8627	2.49962	2.6541
	Solyc01g088530	1.27991	1.39629	0.810487	2.0238	1.48255	1.86964	1.83813	1.94398	1.90909	1.16223	1.792	1.89707
	Solyc01g088550	4.1879	4.02317	4.03449	4.23619	4.32799	4.27369	3.85724	3.82326	3.86879	4.08185	4.27929	3.84976
	Solyc01g088560	6.15442	6.29138	6.06571	6.32286	6.15661	5.91551	6.09007	6.12527	6.20933	6.1705	6.13166	6.14155
	Solyc01g088570	5.50312	5.6284	5.1322	5.4812	5.25897	5.38855	5.73808	5.65282	5.77813	5.42124	5.37624	5.72301
	Solyc01g088590	2.78322	2.57363	2.74376	2.80306	2.41209	2.57527	3.35012	3.37341	3.18914	2.7002	2.59681	3.30423
	Solyc01g088600	5.05617	5.03083	4.72113	4.92262	4.74445	4.6288	5.01355	4.55795	4.7184	4.93605	4.76529	4.7633
	Solyc01g088610	7.52551	7.79196	7.38159	7.66636	7.17952	7.11132	7.48688	7.36331	7.51167	7.56636	7.31907	7.45396
	Solyc01g088620	2.7722	2.71871	2.20181	2.5147	2.25522	2.54779	2.75216	2.65635	2.57911	2.56424	2.43924	2.66254
	Solyc01g088630	-2.12442	-1.32453	-2.28226	-1.8598	-1.4276	-0.346064	-3.11525	-0.636608	-1.72541	-1.91041	-1.21115	-1.82576
	Solyc01g088640	3.18789	3.20423	3.31403	3.13612	2.92355	3.63531	3.42415	3.38821	3.20852	3.23539	3.23166	3.34029
	Solyc01g088650	3.53964	3.48807	3.73775	3.38403	3.63604	3.76628	3.77161	3.54825	3.38921	3.58848	3.59545	3.56969
	Solyc01g088660	7.38117	7.61471	7.50003	7.36442	7.57063	7.35273	7.71658	8.09877	7.87009	7.49864	7.42926	7.89515
	Solyc01g088670	2.09759	1.60076	2.30747	1.98428	2.54822	2.4323	2.25357	2.04078	2.04465	2.00194	2.3216	2.113
	Solyc01g088680	-0.794518	-1.32453	0.207255	0.137044	-0.241697	0.168775	-0.073102	-0.222882	0.142838	-0.637266	0.0213741	-0.051049
	Solyc01g088690	3.65015	4.05333	4.00341	4.15842	4.15417	3.77815	4.07204	4.39595	4.16998	3.9023	4.03025	4.21265
	Solyc01g088700	6.94424	6.73617	7.364	7.07274	7.16153	7.13806	7.04132	6.95373	6.90463	7.0148	7.12411	6.96656
	Solyc01g088710	3.45081	3.76214	3.66008	3.47242	3.54784	3.54785	3.63973	3.71261	3.49557	3.62434	3.5227	3.61597
	Solyc01g088720	4.50342	4.3039	4.63965	4.38397	4.43624	4.57195	4.39198	4.44575	4.62414	4.48232	4.46405	4.48729
	Solyc01g088730	4.72162	4.87629	4.85164	4.67539	4.77276	4.92159	4.67743	4.85544	5.06252	4.81652	4.78991	4.86513
	Solyc01g088740	4.38055	4.3852	4.34926	4.39154	4.21271	4.42108	4.16132	4.54481	4.46971	4.37167	4.34178	4.39195
	Solyc01g088750	2.09759	2.17685	2.84751	2.15417	2.59935	2.41719	2.54656	2.34369	2.50268	2.37398	2.39024	2.46431
	Solyc01g088760	2.87712	2.64139	3.16122	2.20663	2.58667	2.61554	2.4864	3.16587	3.13953	2.89324	2.46961	2.9306
	Solyc01g088770	3.48103	3.77426	3.23576	3.18915	3.33844	3.3943	3.49915	3.78465	4.0245	3.49702	3.3073	3.76943
	Solyc01g088780	0.471606	0.916795	-1.71094	-1.59746	-1.4276	-0.0657994	-0.754739	-0.521534	-0.864919	-0.107514	-1.03029	-0.713731
	Solyc01g088790	-4.16498	-2.55421	-3.2421	-2.59396	-2.22602	-2.15563	-2.51409	-1.41047	-1.23194	-3.32043	-2.3252	-1.71883
	Solyc01g088800	6.07244	6.05221	6.26569	6.28989	6.24696	6.3425	6.22392	6.21619	6.32814	6.13011	6.29311	6.25608
	Solyc01g088810	-0.656533	-1.13121	-0.226287	-1.37557	-1.23645	-0.153308	-1.49806	-1.0499	-0.221944	-0.671342	-0.921778	-0.923302
	Solyc01g088820	3.19229	3.3652	3.16117	3.0996	3.24536	3.32313	3.32457	3.12229	3.45558	3.23955	3.2227	3.30082
	Solyc01g088830	-3.13782	-4.16498	-3.2421	-4.16498	-4.16498	-4.16498	-4.16498	-4.16498	-4.16498	-3.51496	-4.16498	-4.16498
	Solyc01g089840	-4.16498	-4.16498	-4.16498	-4.16498	-2.22602	-4.16498	-4.16498	-4.16498	-4.16498	-4.16498	-3.51866	-4.16498
	Solyc01g089850	2.58878	3.14009	2.08778	2.35345	2.29311	2.11409	2.30672	2.23332	2.74754	2.60555	2.25355	2.42919
	Solyc01g089857	2.92187	2.82744	2.9443	2.89103	2.87259	2.97666	2.9765	2.90291	3.43927	2.89787	2.91343	3.10623
	Solyc01g089870	4.93943	4.94494	5.19038	5.19274	5.01527	5.093	4.57644	4.81769	4.9519	5.02492	5.10034	4.78201
	Solyc01g089880	1.81872	2.23064	2.40592	1.94364	2.54822	2.58882	1.88549	2.65635	2.7208	2.15176	2.36023	2.42088
	Solyc01g089890	-2.12442	-4.16498	-2.68379	-2.18067	-1.4276	-0.694228	-3.11525	-2.62095	-1.03679	-2.99106	-1.43417	-2.25766
	Solyc01g089900	3.62441	3.59447	3.69388	3.41408	3.5863	3.315	3.42415	3.64381	3.53448	3.63758	3.43846	3.53415
	Solyc01g089910	-1.79983	-2.55421	-2.68379	-1.8598	-4.16498	-2.57171	-3.11525	-2.21111	-4.16498	-2.34594	-2.86549	-3.16378
	Solyc01g089915	-4.16498	-4.16498	-4.16498	-4.16498	-4.16498	-3.15874	-4.16498	-4.16498	-4.16498	-4.16498	-3.82957	-4.16498
	Solyc01g089920	-4.16498	-4.16498	-3.2421	-4.16498	-3.20539	-4.16498	-4.16498	-4.16498	-4.16498	-3.85735	-3.84511	-4.16498
	Solyc01g089930	-4.16498	-4.16498	-4.16498	-1.8598	-3.20539	-4.16498	-4.16498	-4.16498	-3.09034	-4.16498	-3.07672	-3.80677
	Solyc01g089950	2.45815	2.60111	2.49808	2.56914	2.89319	2.71773	2.75216	2.8611	2.9453	2.51911	2.72669	2.85286
	Solyc01g089960	1.24511	1.42733	0.850996	-0.72459	0.0791806	2.07612	-3.11525	-1.89231	-2.05442	1.17448	0.476904	-2.354
	Solyc01g089970	9.09336	9.2602	8.93964	9.06812	8.94414	9.01084	9.33051	9.41254	9.37736	9.09773	9.0077	9.37347
	Solyc01g089980	6.35143	6.35294	6.47984	6.02316	6.55883	6.4517	6.26926	6.39618	6.26476	6.39474	6.34456	6.31007
	Solyc01g089990	-3.13782	-4.16498	-4.16498	-2.59396	-2.63462	-2.16216	-2.08078	-2.62095	-4.16498	-3.82259	-2.46358	-2.95557
	Solyc01g090030	-4.16498	-4.16498	-4.16498	-3.17542	-4.16498	-4.16498	-4.16498	-4.16498	-2.48133	-4.16498	-3.83513	-3.60376
	Solyc01g090040	0.133991	-0.128825	-0.226287	0.399902	0.216302	0.801263	-0.266595	0.729407	0.635521	-0.0737072	0.472489	0.366111
	Solyc01g090050	-4.16498	-3.14558	-2.68379	-4.16498	-3.20539	-3.15874	-4.16498	-3.19557	-4.16498	-3.33145	-3.5097	-3.84184
	Solyc01g090100	-4.16498	-4.16498	-4.16498	-4.16498	-4.16498	-4.16498	-4.16498	-4.16498	-3.09034	-4.16498	-4.16498	-3.80677
	Solyc01g090110	-4.16498	-2.13598	-4.16498	-4.16498	-4.16498	-4.16498	-4.16498	-4.16498	-4.16498	-3.48865	-4.16498	-4.16498
	Solyc01g090120	0.208131	1.15798	1.20362	0.33854	0.613928	1.33904	-0.073102	0.682169	0.142838	0.856578	0.763837	0.250635
	Solyc01g090130	-4.16498	-1.81214	-2.26727	-2.18067	-2.22602	-2.15563	-2.51409	-1.89231	-1.06816	-2.74813	-2.18744	-1.82485
	Solyc01g090140	-3.13782	-2.55421	-4.16498	-3.17542	-3.20539	-4.16498	-4.16498	-3.19557	-4.16498	-3.28567	-3.51526	-3.84184
	Solyc01g090160	1.95546	1.77981	1.72335	1.69706	2.13341	2.38649	2.35798	2.29742	2.50268	1.81954	2.07232	2.38603
	Solyc01g090170	5.86607	5.94352	5.72643	5.87063	5.61366	5.83614	5.81689	5.91108	5.9973	5.84534	5.77348	5.90843
	Solyc01g090180	2.34768	2.78013	1.72335	3.84756	3.40451	3.24827	2.59009	2.02193	2.30082	2.28372	3.50012	2.30428
	Solyc01g090190	7.92637	7.87878	7.90833	7.83829	7.76221	7.69295	7.92687	7.88659	7.95818	7.90449	7.76449	7.92388
	Solyc01g090200	5.91331	5.93698	6.07208	6.17931	6.08953	6.03852	5.92974	5.86334	5.79589	5.97413	6.10245	5.86299
	Solyc01g090210	2.01737	1.70578	1.98232	1.51491	1.4551	1.40179	1.42257	2.09589	2.00086	1.90182	1.45727	1.83977
	Solyc01g090220	5.54078	5.76226	5.84734	5.41214	5.72458	5.38467	5.46797	5.65894	5.61906	5.71679	5.50713	5.58199
	Solyc01g090230	5.17416	4.97152	5.05605	5.14501	5.16043	5.0642	5.16148	5.05172	5.10191	5.06724	5.12321	5.10504
	Solyc01g090240	4.40471	4.53167	4.39107	4.54882	4.59558	4.60907	4.40423	4.68619	4.36823	4.44248	4.58449	4.48622
	Solyc01g090260	3.22837	3.00256	3.73775	3.06213	3.24536	3.69781	3.38349	3.38083	3.23711	3.32289	3.3351	3.33381
	Solyc01g090270	6.49815	6.49924	6.70523	6.6756	6.59943	6.56662	6.59365	6.55825	6.61807	6.56754	6.61388	6.58999
	Solyc01g090280	4.60982	4.55998	4.67675	4.66273	4.58969	4.69293	4.63753	4.66812	4.71534	4.61552	4.64845	4.67366
	Solyc01g090290	5.02318	4.98462	5.06253	4.96384	4.78942	4.94284	4.99668	4.977	4.97471	5.02344	4.8987	4.9828
	Solyc01g090300	-3.13782	-4.16498	-4.16498	-4.16498	-4.16498	-4.16498	-4.16498	-4.16498	-4.16498	-3.82259	-4.16498	-4.16498
	Solyc01g090310	-1.53502	-3.14558	-4.16498	-3.17542	-4.16498	-2.57171	-2.51409	-4.16498	-4.16498	-2.94853	-3.30404	-3.61468
	Solyc01g090340	4.92548	4.87629	4.07352	5.41586	4.98784	5.13747	4.18044	3.64381	4.21913	4.6251	5.18039	4.01446
	Solyc01g090350	-3.13782	-1.13121	-1.71094	-1.8598	-0.334456	-3.15874	-2.09102	-2.21111	-1.23194	-1.99332	-1.78433	-1.84469
	Solyc01g090360	-4.16498	-1.81214	-1.49247	-1.37557	0.0791806	-3.15874	-2.09102	-4.16498	-2.48133	-2.48986	-1.48504	-2.91244
	Solyc01g090380	2.95454	2.81576	2.70008	2.76843	2.58667	2.54779	2.50168	3.02152	2.67973	2.82346	2.63429	2.73431
	Solyc01g090390	0.41011	0.456931	0.850996	0.399902	0.884732	0.37049	0.929862	0.775147	-0.0280548	0.572679	0.551708	0.558985
	Solyc01g090410	-0.114459	-0.128825	0.438144	-1.01367	-0.0723553	-0.453047	-1.07905	-0.521534	0.730376	0.0649531	-0.513024	-0.290069
	Solyc01g090420	4.58236	4.5137	4.81417	4.72111	4.4606	4.45846	4.69747	4.38804	4.60963	4.63674	4.54673	4.56505
	Solyc01g090430	3.466	3.58762	3.92964	3.75078	3.6782	3.6803	3.74618	3.82326	3.65943	3.66108	3.7031	3.74296
	Solyc01g090440	4.16014	3.79226	4.13633	4.32982	4.1499	4.13745	4.13217	4.1785	3.9108	4.02958	4.20572	4.07382
	Solyc01g090450	3.3148	3.76214	3.20871	3.13612	3.46769	3.315	3.11208	3.79578	3.40638	3.42855	3.30627	3.43808
	Solyc01g090460	1.50248	1.77981	2.44614	2.6216	2.67291	2.74218	1.4854	1.02276	1.43691	1.90948	2.6789	1.31502
	Solyc01g090470	4.37654	4.50281	4.53476	4.49711	4.6571	4.66442	4.81278	4.62955	4.5839	4.47137	4.60621	4.67541
	Solyc01g090480	4.6668	4.40093	4.81378	4.62468	4.99159	5.05202	4.92433	4.78732	4.78445	4.62717	4.88943	4.83203
	Solyc01g090490	2.15495	2.06286	2.18606	2.04316	2.00208	1.778	2.2715	1.75146	2.57911	2.13462	1.94108	2.20069
	Solyc01g090500	4.76218	4.95846	4.59285	4.57566	4.56701	4.6386	4.74318	5.06329	4.98127	4.77116	4.59376	4.92925
	Solyc01g090510	0.41011	1.04242	0.850996	0.458761	0.613928	-0.0657994	0.629618	0.682169	-0.0280548	0.767843	0.33563	0.427911
	Solyc01g090515	-0.207789	-0.222093	-0.405554	-0.277642	-0.154543	-0.568604	-1.2734	-0.761662	-0.864919	-0.278479	-0.333596	-0.966659
	Solyc01g090520	-0.5306	1.51665	-1.49247	-2.81431	1.98298	-0.694228	0.250012	-2.62095	1.86092	-0.168807	-0.508517	-0.170006
	Solyc01g090527	-4.16498	-4.16498	-3.2421	-4.16498	-4.16498	-4.16498	-3.11525	-4.16498	-4.16498	-3.85735	-4.16498	-3.81507
	Solyc01g090530	-4.16498	-4.16498	-2.68379	-1.59746	-2.63415	-3.15874	-3.11525	-1.63137	-4.16498	-3.67125	-2.46345	-2.97053
	Solyc01g090540	-4.16498	-3.14558	-4.16498	-4.16498	-4.16498	-4.16498	-4.16498	-4.16498	-4.16498	-3.82518	-4.16498	-4.16498
	Solyc01g090550	6.09582	6.07809	6.16741	5.96383	6.17377	6.15921	6.07484	6.36567	6.18154	6.11377	6.09893	6.20735
	Solyc01g090560	3.50329	3.48069	2.4062	3.08098	3.11987	3.14201	2.72638	2.99277	2.96822	3.13006	3.11429	2.89579
	Solyc01g090590	3.75281	3.88463	4.25051	4.1157	4.07973	4.03725	4.0566	4.07715	4.24696	3.96265	4.07756	4.12691
	Solyc01g090610	-0.656533	0.0413643	-0.724712	-2.59396	-0.540045	0.168775	-1.49806	-1.0499	-1.45768	-0.446627	-0.988409	-1.33521
	Solyc01g090630	-0.947111	-3.14558	-1.71094	-3.17542	-1.64801	-1.34695	-2.51409	-1.21895	-3.09034	-1.93455	-2.05679	-2.27446
	Solyc01g090650	1.27991	1.36456	1.6099	1.33808	1.00319	1.49108	1.60339	1.35945	1.22491	1.41812	1.27745	1.39592
	Solyc01g090660	-4.16498	-1.54784	-4.16498	-4.16498	-4.16498	-4.16498	-4.16498	-3.19557	-4.16498	-3.2926	-4.16498	-3.84184
	Solyc01g090670	3.91101	3.84495	4.31709	4.21073	4.14561	4.36707	4.29014	4.19121	3.88694	4.02435	4.24114	4.12276
	Solyc01g090680	3.04835	3.34907	3.84191	3.37641	4.30401	3.0762	3.29857	3.38821	3.00193	3.41311	3.58554	3.22957
	Solyc01g090690	6.07615	5.74718	6.16247	6.03567	6.1353	5.8031	6.0202	5.95934	5.90974	5.99527	5.99136	5.96309
	Solyc01g090693	5.58227	5.37933	5.46778	5.33755	5.55178	5.34929	5.45173	5.39113	5.46223	5.47646	5.41287	5.43503
	Solyc01g090697	-4.16498	-4.16498	-4.16498	-4.16498	-2.08976	-4.16498	-4.16498	-1.35423	-4.16498	-4.16498	-3.47324	-3.22806
	Solyc01g090710	-0.0268016	0.264059	0.326968	-0.184621	0.00540131	0.239194	-0.266595	-1.0499	-0.864919	0.188075	0.0199915	-0.727137
	Solyc01g090720	3.9708	3.93411	3.22421	3.35333	3.41879	3.56851	3.75258	3.9533	3.9108	3.70971	3.44688	3.87223
	Solyc01g090730	4.05961	4.24073	3.40513	4.37636	3.84611	3.71778	3.93245	4.24096	3.70789	3.90183	3.98008	3.96043
	Solyc01g090740	2.22804	2.33255	2.74376	2.18935	2.4953	2.69285	2.47096	2.81805	2.53443	2.43479	2.45917	2.60781
	Solyc01g090750	7.13638	7.12394	7.15932	7.03749	7.01568	6.99657	7.16175	7.02468	7.04126	7.13988	7.01658	7.0759
	Solyc01g090760	3.47353	2.99175	2.23279	2.55572	2.81976	2.75425	3.15135	3.02152	2.26425	2.89936	2.70991	2.81237
	Solyc01g090770	5.46621	5.24854	5.23123	5.42863	5.13038	5.23762	5.54103	5.30208	5.38981	5.31533	5.26554	5.41098
	Solyc01g090780	6.24863	5.61666	6.53372	6.31455	6.4449	6.47955	6.31359	6.28694	6.06145	6.133	6.413	6.22066
	Solyc01g090790	6.02323	5.87703	6.06408	5.76682	6.01663	6.03852	6.02299	6.11084	6.13001	5.98811	5.94065	6.08795
	Solyc01g090800	-1.31137	-2.55421	-1.9685	-1.8598	-2.22602	-1.83309	-1.07905	-1.21895	-0.572587	-1.94469	-1.97297	-0.956861
	Solyc01g090810	0.208131	2.78013	0.207255	-1.59746	4.43974	0.431913	-0.490119	-0.898593	0.221247	1.06517	1.0914	-0.389155
	Solyc01g090840	1.72081	1.62774	1.76635	1.7686	1.90398	1.6546	1.93134	1.68112	1.6784	1.70496	1.77572	1.76362
	Solyc01g090850	3.42772	3.21317	3.61374	3.45812	3.55432	3.66119	3.63281	3.41735	3.49557	3.41821	3.55788	3.51524
	Solyc01g090860	4.4433	4.0731	5.07769	4.77806	5.01869	5.0348	4.79376	4.7362	4.64917	4.53136	4.94385	4.72637
	Solyc01g090870	-4.16498	-3.14558	-2.68379	-4.16498	-4.16498	-4.16498	-3.11525	-4.16498	-4.16498	-3.33145	-4.16498	-3.81507
	Solyc01g090880	5.80018	5.77186	5.55004	5.48464	5.64389	5.65642	5.64237	5.59661	5.72698	5.70736	5.59498	5.65532
	Solyc01g090890	-1.31137	-3.14558	-1.9685	-3.17542	-1.23645	-1.83309	-3.11525	-2.21111	-3.09034	-2.14182	-2.08165	-2.80557
	Solyc01g090900	3.66339	3.89577	4.16473	3.72704	3.81944	3.91888	3.80278	3.79578	3.86268	3.90797	3.82179	3.82042
	Solyc01g090910	4.6678	4.96624	4.80589	4.7971	4.94296	4.8307	4.80606	5.16129	4.89038	4.81331	4.85692	4.95258
	Solyc01g090920	0.793975	1.45772	1.10658	1.27397	1.21439	1.27344	1.4854	1.50229	0.976293	1.11943	1.25393	1.32132
	Solyc01g090940	4.3965	4.21773	4.39893	4.63747	4.45344	4.44735	4.43254	4.52944	4.50334	4.33772	4.51275	4.48844
	Solyc01g090950	4.11267	4.04835	4.65455	4.11334	4.33069	4.30276	4.48331	4.1484	4.46406	4.27186	4.24893	4.36526
	Solyc01g090965	-3.13782	-4.16498	-4.16498	2.33785	2.22972	2.61554	-4.16498	-4.16498	-4.16498	-3.82259	2.39437	-4.16498
	Solyc01g090990	3.75281	3.8564	3.67504	3.78545	3.88777	3.74223	3.60478	3.76777	3.81923	3.76141	3.80515	3.73059
	Solyc01g091000	2.01737	1.33212	1.70137	1.51491	1.86279	1.84727	1.28806	1.81852	2.33649	1.68362	1.74166	1.81436
	Solyc01g091010	-4.16498	-1.54784	-2.28226	-3.17542	-1.90826	-4.16498	-4.16498	-4.16498	-1.72541	-2.66503	-3.08289	-3.35179
	Solyc01g091020	4.93043	5.26796	4.92272	5.05011	4.97678	4.91084	5.09756	5.16344	5.13822	5.04037	4.97924	5.13307
	Solyc01g091030	1.27991	-0.0412223	0.768807	1.62179	1.53593	1.01705	0.513837	1.20091	-1.45768	0.669164	1.39159	0.0856881
	Solyc01g091040	3.49591	3.21317	3.39832	2.79151	2.88293	4.02733	2.14099	2.59391	2.60858	3.36913	3.23392	2.44783
	Solyc01g091050	-3.13782	-1.13121	-0.313138	-0.0148423	-2.22602	-1.34695	-1.07905	-1.63137	0.618933	-1.52739	-1.19594	-0.697162
	Solyc01g091060	-1.53502	-1.32453	-1.98068	-1.37557	-0.433591	-0.983986	-0.754739	-1.41047	-1.41673	-1.61341	-0.93105	-1.19398
	Solyc01g091070	6.11146	6.10474	6.06894	6.05749	6.15398	6.02737	6.12009	6.1741	6.22873	6.09505	6.07961	6.17431
	Solyc01g091080	4.29383	4.30807	4.49255	4.45077	4.41372	4.46944	4.42499	4.24503	4.5839	4.36482	4.44464	4.41797
	Solyc01g091090	3.41994	2.6934	3.5742	3.02806	2.71212	2.693	2.86278	2.68059	2.76073	3.22918	2.81106	2.76803
	Solyc01g091100	-4.16498	-4.16498	-4.16498	-2.59396	-3.20539	-4.16498	-4.16498	-3.19557	0.366335	-4.16498	-3.32144	-2.33141
	Solyc01g091110	-4.16498	-3.14558	-4.16498	-4.16498	-4.16498	-4.16498	-4.16498	-4.16498	-4.16498	-3.82518	-4.16498	-4.16498
	Solyc01g091120	6.14636	6.06177	6.05484	5.87559	5.94047	6.01362	5.99613	6.00565	6.10166	6.08766	5.94323	6.03448
	Solyc01g091130	2.70856	2.38187	3.05247	2.94534	2.83048	3.13279	2.75216	2.51523	2.54902	2.7143	2.96954	2.60547
	Solyc01g091140	0.208131	0.264059	0.00670807	0.515312	-0.241697	0.0167033	0.250012	1.0602	-0.329626	0.159633	0.0967728	0.32686
	Solyc01g091160	5.37966	5.05091	5.76271	5.14725	5.56834	5.34929	5.44444	5.53147	5.74865	5.39776	5.35496	5.57486
	Solyc01g091170	7.29538	7.33058	7.25424	7.48387	7.81259	7.34621	7.38175	7.32778	7.46667	7.2934	7.54756	7.39207
	Solyc01g091180	-1.53502	-0.544656	-1.9685	-1.59746	-0.888215	-1.83309	-1.49806	-4.16498	-2.48133	-1.34939	-1.43959	-2.71479
	Solyc01g091190	6.40048	6.36036	6.42562	6.51017	6.41213	6.37103	6.38611	6.26005	6.31812	6.39549	6.43111	6.32143
	Solyc01g091200	4.15546	4.06866	3.83183	3.89095	3.50832	3.78405	3.53225	3.63143	3.7679	4.01865	3.72778	3.64386
	Solyc01g091210	3.85442	4.05333	3.86187	4.00889	3.96779	3.94018	4.0974	4.3125	4.37179	3.92321	3.97229	4.26056
	Solyc01g091220	6.87134	6.92935	6.57814	6.74776	6.44793	6.62964	6.9315	6.84482	6.97492	6.79294	6.60844	6.91708
	Solyc01g091230	1.64276	1.42733	0.890399	0.207383	0.964772	1.20472	-0.754739	-0.414965	1.10595	1.32016	0.792291	-0.0212519
	Solyc01g091240	2.44287	2.10186	2.05348	2.30615	2.32378	2.20487	1.86201	2.26573	2.02292	2.19941	2.27827	2.05022
	Solyc01g091250	-4.16498	-4.16498	-4.16498	-3.17542	-1.90826	-4.16498	-4.16498	-1.21895	-4.16498	-4.16498	-3.08289	-3.18297
	Solyc01g091260	5.52541	5.42229	6.44141	5.41586	5.78257	6.12009	5.33995	5.72452	6.05731	5.79637	5.77284	5.70726
	Solyc01g091270	4.11771	4.12609	5.1665	4.42882	4.94301	4.66762	4.47379	4.69812	4.32893	4.4701	4.67982	4.50028
	Solyc01g091280	5.23971	5.4146	5.40431	5.30991	5.21505	4.93756	5.32285	5.19743	5.17515	5.35287	5.15417	5.23181
	Solyc01g091290	-2.54391	-1.32453	-2.28226	-1.59746	-1.64801	-4.16498	-4.16498	-2.21111	-2.05442	-2.05024	-2.47015	-2.81017
	Solyc01g091300	0.278646	0.395461	-0.226287	0.0630985	0.0791806	-1.15408	-0.61637	-0.521534	-1.45768	0.149273	-0.337268	-0.865195
	Solyc01g091310	5.60988	5.75768	5.60608	5.44345	5.55242	5.27581	5.50634	5.38243	5.49021	5.65788	5.42389	5.45966
	Solyc01g091320	6.62797	6.58949	4.71566	7.27504	7.24764	7.12359	5.57481	4.15714	5.22553	5.97771	7.21542	4.98583
	Solyc01g091330	2.17357	2.62809	1.78737	2.44363	2.27752	2.76623	2.01889	1.92381	1.83622	2.19634	2.49579	1.92631
	Solyc01g091340	3.66997	3.48069	3.74314	3.94342	3.52821	3.34724	3.86912	3.87669	3.69421	3.63126	3.60629	3.81334
	Solyc01g091350	3.63512	3.6678	3.75919	3.67213	3.7646	3.88084	3.71375	3.99255	3.55733	3.68737	3.77252	3.75454
	Solyc01g091360	0.983859	1.80367	0.681651	2.38414	2.1291	1.49108	0.929862	1.02276	0.783028	1.15639	2.00144	0.911884
	Solyc01g091370	4.48493	4.9124	4.12399	4.84777	4.59243	4.75132	4.5436	4.74197	4.83208	4.50711	4.73051	4.70588
	Solyc01g091380	2.07795	1.62774	2.33629	2.30615	1.98298	2.05675	1.65896	2.04078	2.02358	2.01399	2.11529	1.90777
	Solyc01g091390	4.03799	4.02317	4.04762	4.0949	4.00125	3.98697	4.01994	3.81233	3.86879	4.03626	4.02771	3.90035
	Solyc01g091420	-0.656533	-0.128825	-0.504298	-0.861902	0.456721	-1.15408	-0.374032	-2.62095	-0.445998	-0.429885	-0.519754	-1.14699
	Solyc01g091430	-1.79983	-1.32453	-2.68379	-1.01367	-0.540045	-0.568604	-1.2734	-1.0499	-0.864919	-1.93605	-0.70744	-1.06274
	Solyc01g091440	-2.54391	-4.16498	-4.16498	-4.16498	-3.20539	-1.83309	-3.11525	-2.62095	-4.16498	-3.62462	-3.06782	-3.30039
	Solyc01g091450	2.60259	2.2825	2.30747	2.75675	2.7537	2.61554	2.73933	1.84021	2.2076	2.39752	2.70866	2.26238
	Solyc01g091460	6.45613	6.10474	6.6082	6.66745	6.52788	6.52694	6.53827	6.41896	6.53896	6.38969	6.57409	6.49873
	Solyc01g091470	-1.53502	-4.16498	-3.2421	-3.17542	-4.16498	-3.15874	-1.76429	-2.62095	-2.05442	-2.9807	-3.49971	-2.14655
	Solyc01g091480	3.96547	3.99754	4.00337	4.31794	4.09315	4.21812	4.23173	4.22044	3.96877	3.98879	4.20974	4.14031
	Solyc01g091490	-3.13782	-4.16498	-2.68379	-4.16498	-1.64801	-1.56964	-4.16498	-3.19557	-4.16498	-3.32886	-2.46087	-3.84184
	Solyc01g091500	4.03841	3.95023	3.92964	3.91742	4.137	4.02744	4.04646	3.99255	3.81923	3.97276	4.02729	3.95275
	Solyc01g091510	4.999	4.77132	5.04619	4.89621	4.92311	4.90544	4.83349	4.98517	5.01379	4.93884	4.90825	4.94415
	Solyc01g091520	6.44347	6.39218	6.4003	5.83089	6.15863	6.19286	5.98394	6.09329	6.1924	6.41198	6.06079	6.08988
	Solyc01g091530	7.86216	7.71117	7.94516	7.93167	7.86829	7.69618	7.81084	7.66497	7.50442	7.8395	7.83205	7.66008
	Solyc01g091540	-4.16498	-2.13598	-0.848986	-2.59396	-0.91662	-4.16498	-2.51409	-2.62095	-0.572587	-2.38332	-2.55852	-1.90254
	Solyc01g091550	4.26596	4.59456	4.3564	4.47242	4.46749	4.37078	4.43436	4.41719	4.44376	4.40564	4.4369	4.43177
	Solyc01g091560	-4.16498	-4.16498	-3.2421	-3.17542	-4.16498	-4.16498	-4.16498	-4.16498	-4.16498	-3.85735	-3.83513	-4.16498
	Solyc01g091570	3.2014	3.42794	3.18514	3.33774	3.41879	3.2311	3.1706	3.63143	3.53448	3.27149	3.32921	3.4455
	Solyc01g091580	5.05617	5.15658	5.18048	5.55555	5.12494	5.2653	4.93826	4.81769	4.8507	5.13108	5.31526	4.86888
	Solyc01g091590	4.48862	3.89021	-2.68379	1.3691	0.511049	-0.453047	2.85906	3.56787	-0.221944	1.89835	0.4757	2.06833
	Solyc01g091600	4.53977	4.67113	4.50334	4.61177	4.59558	4.63207	4.45232	4.33856	4.33392	4.57141	4.61314	4.37493
	Solyc01g091610	0.345875	0.456931	0.850996	1.24082	1.14737	-0.0657994	0.0974822	-0.0533951	0.730376	0.551267	0.774127	0.258154
	Solyc01g091620	5.99209	5.93691	6.28405	6.26322	6.18251	6.20281	6.16787	6.31431	6.29906	6.07102	6.21618	6.26041
	Solyc01g091630	5.94001	5.84402	5.92449	6.13721	6.15332	6.22684	6.27149	6.36005	6.22963	5.90284	6.17246	6.28706
	Solyc01g091640	6.93476	7.03278	6.74404	6.97359	6.77564	6.542	6.97726	6.71447	6.74127	6.90386	6.76374	6.811
	Solyc01g091650	5.49223	5.51556	5.53304	5.49532	5.51724	5.54268	5.61042	5.41532	5.51766	5.51361	5.51842	5.51447
	Solyc01g091660	-1.79983	-0.32181	-1.13515	-4.16498	-2.63415	-2.15563	-4.16498	-4.16498	-4.16498	-1.0856	-2.98492	-4.16498
	Solyc01g091670	-2.54391	-2.13598	-1.71094	-4.16498	-4.16498	-1.56964	-4.16498	-4.16498	-4.16498	-2.13028	-3.29987	-4.16498
	Solyc01g091690	6.04362	6.23766	6.38998	6.41306	6.38917	5.83187	6.95097	6.79226	6.71708	6.22375	6.21137	6.8201
	Solyc01g091700	-0.114459	-0.428935	0.0767005	-0.184621	0.511049	0.239194	0.787537	0.476042	0.618933	-0.155564	0.188541	0.627504
	Solyc01g091710	4.41618	4.23099	4.37726	4.6596	4.58295	4.28622	4.4522	4.16997	4.08341	4.34148	4.50959	4.23519
	Solyc01g091720	2.98649	3.03316	3.25473	2.90168	3.22112	3.43236	3.10209	3.51494	3.51904	3.09146	3.18506	3.37869
	Solyc01g091730	6.15325	6.1977	6.61502	6.35278	6.28472	6.21705	6.25951	6.28101	6.32482	6.32199	6.28485	6.28844
	Solyc01g091740	5.54751	5.57221	5.6118	5.35279	5.44525	5.46216	5.33097	5.43325	5.53324	5.57717	5.42006	5.43249
	Solyc01g091750	5.18797	5.20217	5.07543	5.1503	5.13687	5.13285	5.21591	5.39896	5.33356	5.15519	5.14001	5.31615
	Solyc01g091770	1.01662	1.85023	1.5619	1.17213	1.33976	1.51965	1.65896	1.41829	1.36964	1.47625	1.34385	1.4823
	Solyc01g091780	4.09601	4.15883	4.03285	4.17168	4.18811	4.13745	3.99857	3.93327	4.09387	4.0959	4.16574	4.00857
	Solyc01g091790	0.887195	1.33958	1.03806	0.943946	0.842983	1.01705	1.13972	0.682169	0.618933	1.08828	0.934659	0.813606
	Solyc01g091800	4.20986	4.02317	4.28048	4.62147	4.22497	4.01233	3.79903	3.66218	3.6166	4.17117	4.28626	3.69261
	Solyc01g091820	2.97638	3.02303	3.1531	2.99295	2.98242	3.0762	3.05108	2.64408	2.95681	3.05084	3.01719	2.88399
	Solyc01g091830	-4.16498	-4.16498	-4.16498	-4.16498	-3.20539	-4.16498	-4.16498	-4.16498	-4.16498	-4.16498	-3.84511	-4.16498
	Solyc01g091840	-0.656533	1.12048	-0.144369	-1.01367	1.30942	0.306335	-0.073102	-1.89231	0.783028	0.106526	0.200696	-0.39413
	Solyc01g091850	1.58827	1.68023	0.890399	0.81472	0.613928	0.54743	1.9975	2.05939	1.36964	1.3863	0.658693	1.80884
	Solyc01g091860	4.45933	4.54589	4.4647	4.42882	4.60185	4.64185	4.35881	4.49442	4.58018	4.48997	4.55751	4.47781
	Solyc01g091870	-1.31137	-1.13121	-0.504196	-1.8598	-2.22602	-0.831845	-4.16498	-2.62095	-1.45768	-0.982256	-1.63922	-2.74787
	Solyc01g091880	4.84294	4.89585	4.93004	4.72099	4.67803	4.62483	4.87514	4.83603	4.78445	4.88961	4.67462	4.83187
	Solyc01g091890	5.06571	5.18411	4.8764	5.05943	4.84331	5.16486	5.22781	5.249	5.22595	5.04207	5.02253	5.23425
	Solyc01g091900	4.03332	4.02824	3.80114	4.03831	3.78127	4.10952	3.75895	3.74497	3.87486	3.95423	3.97637	3.79293
	Solyc01g091910	4.06359	3.73137	4.11985	4.39154	4.26502	4.28207	3.88663	4.1785	3.87486	3.9716	4.31288	3.98
	Solyc01g091920	1.95415	0.872365	1.29455	0.33854	0.563405	1.23949	0.883963	1.26643	1.22491	1.37369	0.713811	1.1251
	Solyc01g091930	0.587253	0.57253	1.10912	0.0630985	0.842983	1.13255	0.250012	-0.414965	1.5627	0.756301	0.679544	0.465916
	Solyc01g091940	3.0584	3.15871	3.12859	3.24045	3.11111	3.03721	3.29857	3.3281	3.40609	3.11524	3.12959	3.34425
	Solyc01g091950	5.96852	5.61834	6.40327	5.80821	6.49371	6.30073	5.99812	6.282	6.05598	5.99671	6.20088	6.11203
	Solyc01g092950	-4.16498	-4.16498	-4.16498	-4.16498	-3.20539	-1.56964	-4.16498	-4.16498	-4.16498	-4.16498	-2.98	-4.16498
	Solyc01g093960	1.47271	2.06286	1.8081	-0.0972355	0.00540131	2.40192	0.452265	-0.315729	0.618933	1.78122	0.77003	0.251823
	Solyc01g093965	-2.54391	-4.16498	-2.68379	-4.16498	-4.16498	-2.57171	-2.51409	-1.89231	-2.05442	-3.13089	-3.63389	-2.15361
	Solyc01g093970	4.90834	4.76525	4.73473	4.86667	4.84859	4.85589	4.91848	4.71582	4.6169	4.80277	4.85705	4.7504
	Solyc01g093980	-0.947111	-0.670476	0.207255	-3.17542	-3.20539	-0.246469	-3.11525	-2.21111	-1.03679	-0.470111	-2.20909	-2.12105
	Solyc01g093990	2.9865	3.08275	2.51078	3.16293	2.68447	2.89177	3.06143	2.47422	2.82491	2.86001	2.91305	2.78685
	Solyc01g094000	5.71821	5.79684	5.6553	5.75366	5.78127	5.72857	5.74301	5.77322	5.52926	5.72345	5.7545	5.68183
	Solyc01g094010	7.66028	7.86997	7.64044	8.01521	7.75582	7.8819	7.98339	8.1082	8.06498	7.72356	7.88431	8.05219
	Solyc01g094020	3.30639	3.01283	3.40541	3.12708	3.41879	3.21407	3.10975	2.75095	3.3635	3.24154	3.25331	3.07473
	Solyc01g094030	5.57703	5.61666	5.71	5.75219	5.5876	5.49671	5.84561	5.58542	5.5785	5.63456	5.61217	5.66984
	Solyc01g094040	5.27084	5.35732	5.19887	4.95891	4.99159	5.15806	5.50065	5.76175	6.03423	5.27567	5.03618	5.76555
	Solyc01g094050	3.61904	3.12345	4.00337	3.85853	3.62992	3.19612	3.60023	3.13988	3.19887	3.58195	3.56152	3.31299
	Solyc01g094060	5.33379	5.29507	5.53044	5.66584	5.49797	5.62389	5.60997	5.49099	5.48625	5.38643	5.5959	5.52907
	Solyc01g094080	5.05842	4.90415	5.07328	5.07854	5.06141	4.73008	5.05159	4.86869	4.87212	5.01195	4.95668	4.9308
	Solyc01g094090	-4.16498	-4.16498	-4.16498	-0.599219	-0.654984	-1.83309	-4.16498	-4.16498	-4.16498	-4.16498	-1.0291	-4.16498
	Solyc01g094120	-4.16498	-4.16498	-4.16498	-3.17542	-4.16498	-4.16498	-4.16498	-4.16498	-4.16498	-4.16498	-3.83513	-4.16498
	Solyc01g094130	-2.54391	-4.16498	-3.2421	-4.16498	-3.20539	-4.16498	-2.09102	-1.89231	-4.16498	-3.317	-3.84511	-2.7161
	Solyc01g094140	0.974755	-0.0412223	1.43441	0.768937	0.400267	0.168775	1.05961	1.20091	1.22491	0.789314	0.445993	1.16181
	Solyc01g094150	4.58221	4.79532	4.80349	4.74779	4.84859	4.87258	4.88973	4.87395	4.89657	4.72701	4.82299	4.88675
	Solyc01g094170	3.94934	3.87903	4.23529	4.20075	4.2571	4.45106	4.01462	4.22457	4.25631	4.02122	4.30297	4.16516
	Solyc01g094180	-0.656533	0.0413643	-0.405554	-0.184621	-0.654984	-0.694228	-0.490119	0.235475	0.783028	-0.340241	-0.511278	0.176128
	Solyc01g094190	3.92207	4.03848	3.68322	4.0949	3.84081	3.5956	3.98799	3.74511	4.05157	3.88126	3.84377	3.92822
	Solyc01g094200	7.42567	7.48228	7.32977	7.40525	7.18192	7.22008	7.63037	7.4015	7.39156	7.41257	7.26908	7.47448
	Solyc01g094210	3.96547	3.82177	4.50218	2.95376	4.06165	3.6929	4.18049	4.64117	4.76821	4.09647	3.56944	4.52996
	Solyc01g094220	4.05357	4.06818	4.13224	3.79714	4.03871	3.48441	4.1124	4.007	3.94007	4.08466	3.77342	4.01983
	Solyc01g094230	-1.53502	-2.55421	-1.9685	-1.59746	-0.654984	-1.34695	-2.51409	-1.63137	-1.45768	-2.01925	-1.1998	-1.86771
	Solyc01g094240	5.83492	5.81264	6.18077	5.26878	5.55673	5.54316	5.93354	6.37859	6.48176	5.94278	5.45622	6.26463
	Solyc01g094260	6.93426	7.01483	7.18957	6.93321	7.02047	6.855	7.17799	7.54225	7.56771	7.04622	6.93622	7.42932
	Solyc01g094270	2.53217	2.10186	4.14042	2.15417	2.66063	2.46205	3.60478	4.88182	5.09151	2.92482	2.42562	4.52604
	Solyc01g094280	5.05832	5.24854	5.02299	5.01622	4.92811	5.07145	5.09818	5.0424	5.32693	5.10995	5.00526	5.15584
	Solyc01g094290	6.07815	5.97565	6.26057	6.38544	6.30195	6.10838	5.99747	5.83798	5.87693	6.10479	6.26525	5.90413
	Solyc01g094320	-4.16498	-4.16498	-1.49247	-4.16498	-4.16498	-3.15874	-4.16498	-3.19557	-1.23194	-3.27414	-3.82957	-2.86416
	Solyc01g094330	2.7953	2.38093	2.83747	2.88031	2.74239	2.83605	2.90935	3.03097	3.04568	2.67123	2.81958	2.99534
	Solyc01g094340	4.72478	4.59456	5.02509	5.0525	5.24708	5.02237	4.56921	4.38067	4.55391	4.78148	5.10732	4.50126
	Solyc01g094350	5.31923	5.52635	5.52835	5.65013	5.55106	5.66923	5.60866	5.5164	5.597	5.45798	5.62347	5.57402
	Solyc01g094360	4.68963	4.76526	4.52228	4.88556	4.72475	4.81031	4.90991	4.67105	4.5876	4.65905	4.80688	4.72285
	Solyc01g094370	6.93499	7.25887	6.98905	7.15294	6.86421	6.80892	7.20352	7.16068	7.24328	7.06097	6.94203	7.20249
	Solyc01g094380	-4.16498	-4.16498	-4.16498	-4.16498	-4.16498	-4.16498	-1.76429	-4.16498	-2.48133	-4.16498	-4.16498	-2.80353
	Solyc01g094400	-4.16498	-4.16498	-2.68379	-4.16498	-3.20539	-4.16498	-4.16498	-4.16498	-4.16498	-3.67125	-3.84511	-4.16498
	Solyc01g094410	5.66522	6.13914	5.74151	6.79706	6.06486	5.41541	5.57483	5.92298	5.35546	5.84862	6.09244	5.61775
	Solyc01g094420	5.86894	5.86078	5.88114	5.78275	5.76993	5.79874	5.80613	5.8039	5.92153	5.87029	5.78381	5.84386
	Solyc01g094430	-3.13782	-4.16498	-4.16498	-4.16498	-4.16498	-4.16498	-4.16498	-4.16498	-4.16498	-3.82259	-4.16498	-4.16498
	Solyc01g094460	4.3965	4.50645	4.13633	4.37703	4.22495	4.34728	4.37134	4.29298	4.09387	4.34643	4.31642	4.25273
	Solyc01g094470	1.77059	2.23064	1.5619	2.00924	2.02092	1.6546	1.35688	2.18331	2.24561	1.85438	1.89492	1.9286
	Solyc01g094480	7.27679	7.19094	7.18342	7.19235	7.15612	7.09846	7.02909	7.0615	7.095	7.21705	7.14898	7.06187
	Solyc01g094500	4.18789	4.11906	4.06494	4.24875	3.98694	3.98697	4.15651	4.16568	4.21857	4.12396	4.07422	4.18025
	Solyc01g094510	-4.16498	-3.14558	-3.2421	-2.59396	-4.16498	-3.15874	-4.16498	-2.62095	-4.16498	-3.51755	-3.30589	-3.6503
	Solyc01g094520	3.82009	4.14955	3.55978	3.75078	3.85664	3.80161	3.85129	4.06339	4.10425	3.84314	3.80301	4.00631
	Solyc01g094530	4.25063	4.10225	4.16473	4.2939	4.20449	4.13745	4.35455	4.38436	4.01352	4.17253	4.21195	4.25081
	Solyc01g094540	4.51442	4.45842	4.4483	4.46157	4.30785	4.60566	4.92169	4.53554	4.5839	4.47371	4.45836	4.68038
	Solyc01g094550	5.50674	5.46409	5.53475	5.56309	5.40451	5.40778	5.64179	5.55951	5.47629	5.50186	5.45846	5.5592
	Solyc01g094560	4.90191	5.05092	4.63965	4.74565	4.72189	4.79873	4.95223	5.14831	5.30909	4.86416	4.75542	5.13654
	Solyc01g094570	4.22407	4.17681	4.16843	4.59874	4.38261	4.1286	4.51377	4.43867	4.3003	4.18977	4.36998	4.41758
	Solyc01g094580	4.68665	4.4471	4.93644	4.95365	5.00111	5.0422	4.87524	4.93142	4.84761	4.69007	4.99899	4.88476
	Solyc01g094590	0.694314	0.826522	0.850996	1.27397	1.48255	1.75415	0.572889	1.41829	1.73295	0.790611	1.50356	1.24138
	Solyc01g094600	-0.794518	0.264059	-0.724712	-0.377078	-0.540045	-0.346064	0.387947	-1.21895	0.783028	-0.418391	-0.421062	-0.0159914
	Solyc01g094610	0.641776	-0.128825	0.00670807	0.672769	-0.334456	0.490827	-0.490119	-0.636608	-0.864919	0.17322	0.27638	-0.663882
	Solyc01g094620	4.64695	4.17264	4.88128	4.67387	4.79456	4.98444	4.73674	4.90257	4.65977	4.56696	4.81762	4.76636
	Solyc01g094630	3.96547	3.94487	4.34217	4.1061	4.17535	4.09535	3.93808	4.27717	4.08865	4.08417	4.1256	4.1013
	Solyc01g094640	6.26602	6.14148	6.47337	6.21795	6.31056	6.38176	6.27371	6.40075	6.50311	6.29362	6.30342	6.39252
	Solyc01g094650	-0.947111	0.119478	-0.226287	-0.72459	-0.779879	-0.983986	-0.754739	-0.0533951	-0.711361	-0.351307	-0.829485	-0.506498
	Solyc01g094660	4.80841	4.63834	5.06684	5.15394	5.21483	5.31505	5.07986	5.18266	5.03836	4.83786	5.22794	5.10029
	Solyc01g094670	3.51794	3.1862	3.51005	3.32197	3.35339	3.66119	3.35012	3.33575	3.32851	3.40473	3.44552	3.33813
	Solyc01g094680	5.615	5.77136	5.48715	5.87074	5.79341	5.89748	5.55109	5.41711	5.25885	5.62451	5.85388	5.40902
	Solyc01g094690	7.37097	7.64915	7.16268	7.16852	7.11693	7.10897	7.15255	7.02812	6.94128	7.39427	7.13147	7.04065
	Solyc01g094700	8.08967	8.00633	8.1626	8.29004	8.3156	8.36093	8.28993	8.56583	8.49731	8.0862	8.32219	8.45102
	Solyc01g094705	-1.53502	-0.544656	-1.13515	-0.861902	-0.779879	-0.831845	-0.073102	-0.636608	0.295614	-1.07161	-0.824542	-0.138032
	Solyc01g094720	6.86519	7.08664	6.66377	6.92455	6.76168	6.57027	6.84671	6.51112	6.63052	6.87187	6.75217	6.66279
	Solyc01g094727	-4.16498	-4.16498	-4.16498	-4.16498	-4.16498	-4.16498	-4.16498	-4.16498	-3.09034	-4.16498	-4.16498	-3.80677
	Solyc01g094750	4.75292	4.44331	3.88221	4.53331	4.44766	4.66442	4.44077	4.87395	4.95459	4.35948	4.54846	4.75644
	Solyc01g094760	2.75887	2.97131	2.88701	3.0996	3.10229	2.81315	3.1706	3.08645	2.82491	2.8724	3.00501	3.02732
	Solyc01g094770	5.18452	5.10711	5.35435	5.00885	5.20582	4.95597	5.39212	5.33168	5.39194	5.21533	5.05688	5.37191
	Solyc01g094780	2.34768	2.36498	2.66643	2.24297	2.38325	2.38649	2.54656	2.64408	2.66578	2.4597	2.33757	2.61881
	Solyc01g094790	6.05496	5.92226	6.09229	6.00513	6.09992	5.3453	6.18107	6.17196	6.11586	6.02317	5.81679	6.1563
	Solyc01g094800	5.86367	5.55346	6.36127	6.11557	6.17201	6.13818	6.15469	6.10638	5.94338	5.92613	6.14192	6.06815
	Solyc01g094810	5.11276	5.20888	5.27536	4.89891	4.98919	5.11891	5.033	5.1006	5.19448	5.199	5.00234	5.10936
	Solyc01g094820	1.31388	0.916795	1.10658	1.3691	0.662741	0.84708	1.45432	1.0602	0.882894	1.11242	0.959639	1.13247
	Solyc01g094830	4.66022	4.63834	4.49697	4.90686	4.6869	4.76928	4.41359	4.63129	4.42317	4.59851	4.78768	4.48935
	Solyc01g094840	1.93244	2.34886	1.96397	2.08112	2.00208	2.44725	1.65896	2.61921	2.53374	2.08176	2.17682	2.27064
	Solyc01g094850	0.471606	0.456931	0.890399	1.1	0.884732	0.601895	0.250012	0.633332	1.22491	0.606312	0.86221	0.70275
	Solyc01g094860	2.65655	2.54561	2.99036	2.58244	2.80896	3.14201	2.73933	3.10448	3.00193	2.73084	2.84447	2.94858
	Solyc01g094870	0.278646	0.627032	0.143454	0.207383	0.00540131	0.37049	0.320628	0.29948	-0.0280548	0.349711	0.194425	0.197351
	Solyc01g094880	5.8576	5.67927	6.08511	6.09739	6.09073	6.10924	6.06734	5.94316	5.9506	5.87399	6.09912	5.98703
	Solyc01g094890	3.98142	4.05333	4.46796	3.77993	3.51498	4.15577	3.35012	3.46697	3.7808	4.16757	3.81689	3.53263
	Solyc01g094910	2.26325	1.04242	3.12859	0.943946	2.61175	2.22236	1.57478	2.05939	2.87428	2.14475	1.92602	2.16948
	Solyc01g094915	-4.16498	-4.16498	-3.2421	-4.16498	-4.16498	-4.16498	-4.16498	-4.16498	-4.16498	-3.85735	-4.16498	-4.16498
	Solyc01g094920	5.8789	5.56001	5.4694	5.76682	5.63424	5.09542	5.47185	5.48761	5.03293	5.6361	5.49883	5.3308
	Solyc01g094930	6.13207	6.23075	6.29583	6.13571	5.9762	5.86984	6.16036	5.91278	5.85238	6.21955	5.99392	5.97517
	Solyc01g094940	5.20651	5.30813	5.75874	5.39718	5.7503	5.70076	4.86632	5.22241	5.09672	5.42446	5.61608	5.06182
	Solyc01g094950	8.28018	8.29218	7.94978	8.08122	8.11531	7.99053	8.04304	8.20999	8.07821	8.17404	8.06235	8.11041
	Solyc01g094960	4.73736	4.65975	4.51599	4.65016	4.79212	4.67081	4.72702	4.64675	4.64206	4.6377	4.70436	4.67195
	Solyc01g094970	0.133991	-0.960753	1.84867	-1.59746	0.0791806	-0.246469	-1.76429	0.476042	-0.221944	0.340637	-0.58825	-0.503397
	Solyc01g094990	-1.53502	-4.16498	-0.848986	-3.17542	-1.06769	-2.15563	-4.16498	-2.21111	-1.72541	-2.183	-2.13292	-2.7005
	Solyc01g095000	4.52896	4.35323	4.88128	4.7971	4.9004	4.89729	4.27238	4.34699	4.39808	4.58782	4.86493	4.33915
	Solyc01g095010	3.82527	3.60129	3.54133	3.63433	3.32334	3.13279	3.70896	3.18294	3.47971	3.65596	3.36349	3.4572
	Solyc01g095020	5.652	5.28713	5.97017	5.66668	5.81427	5.77078	5.65038	5.57414	5.64579	5.63643	5.75058	5.62344
	Solyc01g095030	5.08351	5.13567	5.30781	4.98402	5.22941	5.18284	5.28582	5.06329	5.0055	5.17566	5.13209	5.11821
	Solyc01g095040	6.14737	6.11312	6.294	6.16943	6.33741	6.07628	6.34955	6.21188	6.24496	6.18483	6.19437	6.2688
	Solyc01g095050	9.52138	9.64914	9.44588	9.37193	9.54187	9.62626	9.65189	9.97302	10.045	9.5388	9.51335	9.88998
	Solyc01g095060	1.3082	0.730223	1.26487	0.399902	0.456721	1.16909	1.17826	1.44684	0.67573	1.1011	0.675236	1.10027
	Solyc01g095070	5.68606	5.9288	5.71353	5.43069	5.42571	5.35128	5.86105	5.85937	5.81178	5.77613	5.40256	5.84407
	Solyc01g095080	-3.13782	-4.16498	-3.2421	-3.17542	-4.16498	-3.15874	-4.16498	-1.89231	-4.16498	-3.51496	-3.49971	-3.40742
	Solyc01g095090	0.41011	0.959897	0.540172	1.33808	-0.241697	0.490827	0.684201	0.582784	0.882894	0.636726	0.529071	0.716626
	Solyc01g095100	1.01662	0.627032	0.143454	-0.184621	0.511049	0.891485	-0.266595	1.13227	-0.572587	0.595702	0.405971	0.0976946
	Solyc01g095110	2.26325	2.4123	2.35049	2.5147	2.21343	2.23964	1.95373	2.31301	2.47094	2.34201	2.32259	2.24589
	Solyc01g095120	4.76218	4.48448	4.66919	4.60201	4.59243	4.45477	4.50622	4.42438	4.62774	4.63861	4.54973	4.51945
	Solyc01g095130	-3.13782	-1.32453	-1.13515	-0.483877	-2.22602	-3.15874	-0.9078	-1.63137	-0.329626	-1.86583	-1.95621	-0.956265
	Solyc01g095140	4.53308	4.52092	1.82853	4.372	2.78711	2.09523	3.18959	3.89752	2.06605	3.62751	3.08478	3.05105
	Solyc01g095150	7.57487	7.81285	6.87781	7.63324	6.96241	6.91351	7.25866	7.4711	7.16792	7.42184	7.16972	7.29923
	Solyc01g095160	0.745005	1.19453	1.32363	0.859094	1.42712	1.01705	0.974346	1.09668	0.976293	1.08772	1.10109	1.01577
	Solyc01g095180	3.71516	3.76821	3.66565	3.86949	3.69007	3.91888	3.89244	4.39539	4.00246	3.71634	3.82615	4.09676
	Solyc01g095190	-3.13782	-2.13598	-4.16498	-2.59396	-1.4276	-2.15563	-4.16498	-3.19557	-4.16498	-3.14626	-2.05906	-3.84184
	Solyc01g095200	7.90781	7.82959	8.04086	7.89688	8.0347	7.78079	8.04169	8.02733	7.9784	7.92609	7.90412	8.01581
	Solyc01g095210	5.10308	4.9636	5.28041	5.09829	5.13772	5.1873	5.19509	5.0424	5.09672	5.11569	5.14111	5.11141
	Solyc01g095220	2.34768	2.68057	2.8069	2.32209	2.26176	2.51977	2.03997	3.20817	3.53448	2.61172	2.36787	2.92754
	Solyc01g095230	2.80727	2.95076	2.54822	2.59561	2.78711	2.8586	2.76488	2.59391	2.73423	2.76875	2.74711	2.69767
	Solyc01g095240	1.17289	0.119478	0.383295	0.672769	0.456721	0.705021	-1.49806	-0.315729	-0.121745	0.558556	0.611504	-0.645179
	Solyc01g095250	-1.11777	-0.960753	-1.9685	-1.01367	-3.20539	-2.57171	-1.76429	-2.62095	-3.09034	-1.34901	-2.26359	-2.49186
	Solyc01g095260	-4.16498	-4.16498	-4.16498	-4.16498	-4.16498	-4.16498	-4.16498	-3.19557	-4.16498	-4.16498	-4.16498	-3.84184
	Solyc01g095270	3.25549	3.55285	3.38458	3.28178	3.5989	3.20494	3.52479	3.70417	3.51904	3.39764	3.36188	3.58267
	Solyc01g095280	4.99466	5.03336	5.06697	5.19347	5.253	5.33529	5.20413	5.47542	5.39194	5.03166	5.26059	5.35716
	Solyc01g095290	3.33149	3.0532	3.20089	3.4795	3.10386	2.89177	3.4401	3.15726	3.18909	3.19519	3.15838	3.26215
	Solyc01g095295	-2.40788	-4.16498	-4.16498	-3.17542	-2.63415	-4.16498	-4.16498	-4.16498	-3.09413	-3.57928	-3.32485	-3.80803
	Solyc01g095300	5.58839	5.36335	5.75079	5.50409	5.53611	5.56688	5.49102	5.57253	5.48532	5.56751	5.5357	5.51629
	Solyc01g095310	-4.16498	-1.81214	-4.16498	-2.59396	-1.23645	-1.83309	-3.11525	-1.21895	-4.16498	-3.3807	-1.88783	-2.83306
	Solyc01g095320	9.79661	9.37718	10.8787	10.2837	10.841	10.577	9.4339	9.44545	9.89019	10.0175	10.5672	9.58985
	Solyc01g095330	3.64518	3.38481	4.54913	4.24707	4.4489	4.63395	3.16425	3.60949	3.95399	3.85971	4.44331	3.57591
	Solyc01g095350	-3.13782	-2.55421	-3.2421	-4.16498	-2.63415	-4.16498	-2.09102	-1.41047	-4.16498	-2.97804	-3.6547	-2.55549
	Solyc01g095360	1.27991	1.98153	0.810487	1.5958	1.4551	1.54767	1.3901	1.35945	1.4694	1.35731	1.53286	1.40632
	Solyc01g095370	4.11267	4.09259	4.10736	3.42888	3.98694	4.12355	3.84532	3.84487	3.67345	4.10421	3.84646	3.78788
	Solyc01g095390	2.13608	2.58744	2.59667	2.55572	2.6364	2.46205	2.2715	2.82893	2.91023	2.44006	2.55139	2.67022
	Solyc01g095400	5.99108	5.93151	6.0279	5.88693	5.95524	5.74832	5.96753	5.70102	5.91712	5.98349	5.8635	5.86189
	Solyc01g095410	10.4034	10.6534	10.3952	10.3526	10.5344	10.6303	10.55	10.8793	10.9416	10.484	10.5058	10.7903
	Solyc01g095420	4.52534	4.70194	4.2989	4.25291	4.29253	4.43989	4.63303	4.59349	4.64206	4.50872	4.32845	4.62286
	Solyc01g095430	7.43793	7.44617	7.33564	7.87786	7.83676	7.65997	6.8672	6.71645	6.85845	7.40658	7.79153	6.81404
	Solyc01g095440	-4.16498	-4.16498	-4.16498	-2.59396	-4.16498	-4.16498	-4.16498	-4.16498	-3.09034	-4.16498	-3.6413	-3.80677
	Solyc01g095450	3.837	3.24836	1.46083	2.93315	3.4949	2.05675	2.06075	1.41829	2.6231	2.84873	2.82827	2.03405
	Solyc01g095460	5.7154	5.68248	5.32409	5.62954	5.53121	5.81756	5.72225	5.98756	5.60251	5.57399	5.65944	5.77077
	Solyc01g095470	5.6702	5.75156	5.57444	5.50948	5.16686	5.41541	5.67754	5.34131	5.49992	5.6654	5.36391	5.50626
	Solyc01g095480	5.43374	5.70006	5.24079	5.4472	5.33058	5.35326	5.65228	5.60455	5.5465	5.4582	5.37701	5.60111
	Solyc01g095490	3.5468	3.44321	3.66578	3.33607	3.34593	3.30683	3.06143	3.53502	3.74818	3.55193	3.32961	3.44821
	Solyc01g095500	1.69526	1.70578	1.13966	1.33818	1.39858	1.30662	0.250012	0.476042	1.26247	1.51356	1.34779	0.662843
	Solyc01g095510	3.77127	3.95556	3.43209	4.09552	3.50163	3.76628	3.99856	3.41735	3.7679	3.71964	3.78781	3.72794
	Solyc01g095515	-0.794518	-0.128825	-0.724712	-0.72459	-0.654984	-0.0657994	-2.51409	-1.21895	-1.72541	-0.549352	-0.481791	-1.81948
	Solyc01g095530	9.91647	10.1641	9.98891	9.56293	9.84639	9.86088	9.60847	10.1639	10.2503	10.0232	9.75673	10.0076
	Solyc01g095540	4.9063	4.70953	4.65975	4.6998	4.59871	4.92426	4.78436	4.72167	4.78767	4.75853	4.74093	4.76457
	Solyc01g095550	-2.12442	-4.16498	-1.49247	-2.18067	-3.20539	-3.15874	-2.09102	-2.62095	-2.05442	-2.59396	-2.84827	-2.25546
	Solyc01g095560	0.471606	0.456931	-0.724712	-1.1833	-1.06769	0.891485	-2.09102	-0.761662	-0.329626	0.0679415	-0.45317	-1.06077
	Solyc01g095570	6.63113	6.67758	6.6118	6.52229	6.38747	6.4343	6.55938	6.58298	6.7774	6.64017	6.44802	6.63992
	Solyc01g095580	4.40815	4.3852	4.73202	4.00889	4.26107	4.0471	4.54438	4.55468	4.43965	4.50846	4.10568	4.5129
	Solyc01g095590	5.2132	5.12616	4.94572	5.33177	5.17943	5.16033	5.13478	4.75058	4.67378	5.09503	5.22384	4.85305
	Solyc01g095600	-1.11777	-1.13121	-0.848986	-1.01367	-0.241697	-0.983986	-0.166607	-1.89231	-0.711361	-1.03266	-0.746451	-0.923428
	Solyc01g095610	2.09759	2.44301	2.18606	2.27373	2.50871	2.44725	2.30795	2.52865	2.30082	2.24222	2.4099	2.37914
	Solyc01g095620	5.84386	5.5335	5.25054	5.26736	5.34747	5.08949	5.25234	5.53977	5.30008	5.54263	5.23477	5.36407
	Solyc01g095630	4.06223	3.94487	0.636016	3.37641	1.90398	2.23964	0.736794	3.21648	0.366335	2.88104	2.50668	1.43987
	Solyc01g095640	-4.16498	-2.55421	-2.68379	-2.18067	-4.16498	-3.15874	-1.49806	-4.16498	-3.09034	-3.13433	-3.16813	-2.91779
	Solyc01g095650	-0.0268016	-0.32181	-2.28226	-0.599219	-0.779879	0.0947421	0.320628	0.0244231	-0.445998	-0.876959	-0.428119	-0.0336491
	Solyc01g095670	6.3276	6.29032	6.39589	6.44395	6.24192	6.06728	6.01796	5.67109	5.84157	6.33794	6.25105	5.84354
	Solyc01g095680	2.88843	3.06312	2.89672	3.0526	2.96306	3.02729	2.78999	2.96343	3.03487	2.94942	3.01432	2.92943
	Solyc01g095690	1.74592	0.872365	0.489752	1.4869	1.79871	1.46192	0.736794	-0.761008	-0.121745	1.03601	1.58251	-0.0486532
	Solyc01g095700	5.20391	5.62857	5.37011	5.33961	5.599	5.53406	5.41852	5.59979	5.29782	5.40086	5.49089	5.43871
	Solyc01g095710	3.13643	2.99222	4.02566	3.37641	3.74206	3.65477	3.1706	3.18294	3.26514	3.38477	3.59108	3.20623
	Solyc01g095720	4.33164	4.38126	4.7748	4.99401	5.37886	5.09062	4.74331	5.29682	4.87212	4.4959	5.15449	4.97075
	Solyc01g095730	4.87174	4.46217	5.09072	4.94338	5.13687	5.11891	4.78022	4.94346	4.9662	4.80821	5.06639	4.89663
	Solyc01g095740	5.05116	4.82767	5.06294	5.13151	4.98431	5.05933	5.04507	4.90514	5.00273	4.98059	5.05838	4.98431
	Solyc01g095750	4.64027	5.12852	4.82997	5.13602	5.20409	5.27162	4.60855	5.15588	4.81005	4.86625	5.20391	4.85816
	Solyc01g095760	-1.31137	-2.13598	-2.68379	-0.861902	-2.63415	-1.15408	-0.9078	-0.521534	-0.572587	-2.04371	-1.55004	-0.667307
	Solyc01g095770	-1.79983	-4.16498	-3.2421	-3.17542	-2.63415	-1.34695	-4.16498	-3.19557	-3.09034	-3.06897	-2.38551	-3.48363
	Solyc01g095780	-2.54391	-1.32453	-2.28226	-2.18067	0.14937	-3.15874	-1.07905	-4.16498	-0.445998	-2.05024	-1.73001	-1.89668
	Solyc01g095790	6.96968	6.68892	7.31717	6.96826	7.58656	7.27014	6.90503	7.07869	7.14044	6.99192	7.27498	7.04139
	Solyc01g095800	4.11267	3.89577	4.1157	4.18481	3.953	4.21375	3.99316	4.08171	4.05157	4.04138	4.11719	4.04215
	Solyc01g095810	-3.13782	-2.55421	-0.984982	-2.59396	-1.64801	-0.694228	-1.49806	-1.21895	-2.05442	-2.22567	-1.6454	-1.59048
	Solyc01g095860	-2.54391	-3.14558	-2.28226	-4.16498	-3.20539	-3.15874	-3.11525	-4.16498	-4.16498	-2.65725	-3.5097	-3.81507
	Solyc01g095870	-4.16498	-4.16498	-4.16498	-4.16498	-3.20539	-4.16498	-4.16498	-4.16498	-4.16498	-4.16498	-3.84511	-4.16498
	Solyc01g095890	3.78949	3.60134	4.23529	3.89095	4.13267	4.09542	3.81337	4.06339	3.8504	3.87537	4.03968	3.90906
	Solyc01g095900	4.84002	4.47337	5.38623	5.36529	5.55244	5.23762	4.65711	4.57745	4.46002	4.89987	5.38512	4.56486
	Solyc01g095905	-4.16498	-4.16498	-4.16498	-4.16498	-3.20539	-4.16498	-4.16498	-4.16498	-4.16498	-4.16498	-3.84511	-4.16498
	Solyc01g095920	-0.5306	-1.81214	-0.848986	-1.59746	-1.64801	-2.57171	-0.754739	-0.222882	-1.23194	-1.06391	-1.93906	-0.73652
	Solyc01g095930	4.7121	3.93411	5.18643	4.42882	5.09079	4.70542	5.16868	5.58887	5.73034	4.61088	4.74168	5.49596
	Solyc01g095970	5.19445	5.22443	5.03862	5.414	5.2237	5.08585	5.10258	5.23158	5.27732	5.1525	5.24119	5.20383
	Solyc01g095980	3.34798	3.12123	3.31393	3.39913	3.35339	3.49219	2.9982	3.00241	3.63099	3.26105	3.4149	3.21054
	Solyc01g095990	5.56297	5.40696	5.1688	5.40096	5.06606	5.10954	5.21344	5.41891	5.25187	5.37958	5.19219	5.29474
	Solyc01g096000	4.2348	4.26146	3.72145	3.75666	3.77005	3.57533	3.93245	3.96815	4.0408	4.07257	3.70068	3.98047
	Solyc01g096010	4.30232	4.12136	4.62221	4.38017	4.36716	4.41349	4.48331	4.37697	4.3245	4.34863	4.38694	4.39493
	Solyc01g096020	4.33163	4.28283	4.02566	4.0333	4.10923	4.06174	3.92113	4.56122	4.22334	4.21338	4.06809	4.23523
	Solyc01g096030	3.33976	3.31628	3.57194	3.46522	3.61769	3.61559	3.5617	3.85022	3.46367	3.40933	3.56617	3.6252
	Solyc01g096040	8.10926	8.17904	7.65686	8.1657	7.97484	7.80928	8.45038	8.23183	8.1499	7.98172	7.98327	8.27737
	Solyc01g096050	4.96823	4.41261	5.37011	4.26541	4.61737	4.97415	4.28126	4.81221	4.70481	4.91699	4.61898	4.59943
	Solyc01g096060	5.42659	5.32471	5.62933	5.37442	5.29894	5.31912	5.33356	5.29098	5.47829	5.46021	5.33083	5.36761
	Solyc01g096070	2.19196	2.42774	2.32195	1.98428	2.24583	2.37089	2.45535	2.1138	2.31877	2.31388	2.20033	2.29597
	Solyc01g096080	4.36443	4.38915	4.38418	4.38397	4.69279	4.56854	4.49099	4.82314	4.8005	4.37925	4.54843	4.70488
	Solyc01g096090	6.04993	6.09126	5.66665	5.97746	5.72187	5.86008	6.09755	6.17578	6.39098	5.93594	5.85314	6.22144
	Solyc01g096100	6.57255	6.55213	6.55072	6.45954	6.56044	6.48368	6.68969	6.83255	6.69221	6.55847	6.50122	6.73815
	Solyc01g096110	4.47056	4.14489	4.93879	4.71806	4.68395	4.7889	4.42067	4.56773	4.73853	4.51808	4.7303	4.57564
	Solyc01g096120	-1.79983	-1.32453	-1.9685	-2.18067	-2.63415	-1.83309	-3.11525	-2.21111	-4.16498	-1.69762	-2.21597	-3.16378
	Solyc01g096130	5.12232	5.36535	5.15221	5.20979	5.3825	5.35524	5.31854	5.43681	5.29102	5.21329	5.31584	5.34879
	Solyc01g096140	-1.53502	-2.13598	-1.49247	-2.18067	-2.63415	-1.83309	-3.11525	-0.898593	-2.48133	-1.72116	-2.21597	-2.16506
	Solyc01g096150	4.35474	4.60138	3.96698	4.45074	4.45381	4.28622	4.52503	4.39539	4.24696	4.3077	4.39692	4.38913
	Solyc01g096160	4.14606	4.19536	4.44168	4.45852	4.39024	4.35523	4.19461	4.27717	4.59498	4.26103	4.40133	4.35559
	Solyc01g096170	0.133991	-0.222093	0.489752	0.207383	-0.540045	0.705021	-0.266595	0.0982578	0.498155	0.133883	0.124119	0.109939
	Solyc01g096180	4.35667	4.4471	4.38763	4.48654	4.55089	4.86146	4.46932	4.66812	4.73185	4.39713	4.63296	4.6231
	Solyc01g096190	4.19246	3.9395	3.62556	4.215	4.05252	4.2737	4.18044	4.19121	3.85655	3.91917	4.1804	4.07607
	Solyc01g096200	3.94393	4.0583	3.6883	4.47232	3.99685	4.10481	3.96588	4.007	3.79379	3.89684	4.19133	3.92223
	Solyc01g096210	3.07831	3.11313	3.22421	3.28991	3.32376	3.12351	3.09203	3.10448	3.06707	3.13855	3.24573	3.08786
	Solyc01g096220	5.33171	5.76378	5.24037	5.41771	5.12821	5.24619	5.48726	5.47022	5.49417	5.44529	5.26404	5.48388
	Solyc01g096230	4.77748	4.58427	4.46483	4.17607	4.2571	4.38659	4.24999	4.28114	4.48407	4.60886	4.27325	4.3384
	Solyc01g096240	7.65832	7.78037	7.49144	8.0903	7.70196	7.63944	7.55377	7.34089	7.40663	7.64337	7.81057	7.43376
	Solyc01g096250	2.60259	3.14943	3.10366	2.94349	2.78711	3.0762	1.83813	1.77416	1.5627	2.95189	2.9356	1.725
	Solyc01g096260	-0.307577	-0.128825	-0.504298	0.721654	0.755675	-0.153308	-1.49806	-0.898593	-0.329626	-0.313567	0.44134	-0.908761
	Solyc01g096270	7.33167	7.41378	6.9978	7.1416	7.18292	7.21386	7.22209	7.33113	7.5061	7.24775	7.17946	7.35311
	Solyc01g096280	-0.656533	-0.0412223	0.00670807	-0.184621	0.925307	-0.0657994	0.736794	0.633332	0.618933	-0.230349	0.224962	0.66302
	Solyc01g096290	7.54163	7.7584	7.17706	7.35564	7.33559	7.31964	7.63361	7.73897	7.69866	7.49236	7.33696	7.69041
	Solyc01g096300	1.01662	1.12048	1.26487	0.81472	1.77671	1.09507	0.513837	1.0602	0.730376	1.13399	1.22883	0.768136
	Solyc01g096320	5.24632	4.05333	5.26737	4.83629	5.60488	4.89457	5.37563	5.49092	5.16144	4.85567	5.11191	5.34266
	Solyc01g096330	0.471606	0.264059	0.143454	-0.483877	-0.0723553	0.37049	0.320628	1.20091	0.295614	0.29304	-0.0619141	0.605716
	Solyc01g096340	4.95408	4.74999	4.58966	4.52202	4.75321	4.9402	4.2363	4.67417	4.57136	4.76458	4.73847	4.49394
	Solyc01g096350	5.11045	5.09985	5.27096	5.26735	5.20886	5.29866	5.37148	5.37131	5.22595	5.16042	5.25829	5.32291
	Solyc01g096360	2.99699	3.32455	2.39226	3.23204	3.02971	3.10493	2.90935	2.38853	2.54902	2.9046	3.12223	2.61563
	Solyc01g096370	3.17391	2.95009	2.33629	2.55572	3.09341	3.15117	1.73849	1.50229	0.930349	2.8201	2.93344	1.39037
	Solyc01g096380	-4.16498	-4.16498	-4.16498	-4.16498	-3.20539	-4.16498	-3.11525	-4.16498	-4.16498	-4.16498	-3.84511	-3.81507
	Solyc01g096390	5.45146	4.87629	5.6353	5.49235	5.54267	5.51456	5.39825	5.2429	5.38769	5.32102	5.51653	5.34295
	Solyc01g096400	1.41126	1.51665	1.32363	2.20663	2.05789	1.75415	1.86201	1.29811	1.02082	1.41718	2.00622	1.39364
	Solyc01g096410	2.11696	2.78013	1.5861	2.48669	2.36861	2.16924	2.89785	2.14897	2.31877	2.16106	2.34151	2.4552
	Solyc01g096420	2.74637	2.90669	1.172	2.0238	1.77671	1.68014	1.51581	2.09589	1.26247	2.27502	1.82688	1.62473
	Solyc01g096430	5.31518	5.59955	4.96557	5.16944	5.17311	5.31709	5.47959	5.43805	5.34892	5.29343	5.21988	5.42219
	Solyc01g096440	1.66925	1.93907	2.03602	1.83675	1.75436	1.46192	1.88549	1.82297	1.6784	1.88145	1.68434	1.79562
	Solyc01g096450	8.7835	8.58638	7.37547	8.74284	7.7491	7.98251	8.70871	8.13025	7.97017	8.24845	8.15815	8.26971
[truncated: 23,261 more rows]

## Sheet: Table S3
	Table S3. Differentially expressed genes in the stem part of CR-Slglk2-4 (CR4) fruit compared to stem part of u allele fruit at 15 days after pollination.
																	average
	gene_id	CR-Slglk2-4_stem - u_stem	logFC	logCPM	LR	PValue	FDR	u_stem_rep1	u_stem_rep2	u_stem_rep3	CR4_stem_rep1	CR4_stem_rep2	CR4_stem_rep3	CR4_tip_rep1	CR4_tip_rep2	CR4_tip_rep3	WT_stem	u_d13_stem	u_d13_tip
	Solyc01g006330	up	1.18935	2.55437	16.3698	5.21085e-05	0.00648353	2.53217	2.26542	1.88814	3.69679	3.23733	3.315	1.35688	0.944853	0.142838	2.22858	3.41637	0.814858
	Solyc01g006555	up	1.22875	4.52534	19.4314	1.0428e-05	0.00159631	4.30654	3.48807	4.12811	5.50408	5.16256	5.01235	4.26477	3.24114	4.00247	3.97424	5.22633	3.83612
	Solyc01g008510	up	3.24261	2.19674	32.8187	1.01167e-08	3.36219e-06	-0.794518	-0.670476	1.43441	3.30603	3.71916	3.7054	-2.51409	-3.19557	-2.48133	-0.0101945	3.57686	-2.73033
	Solyc01g014320	up	4.5989	0.188184	53.2293	2.96799e-13	2.41824e-10	-2.54391	-2.55421	-2.68379	1.51491	1.53593	1.51965	-4.16498	-4.16498	-1.23194	-2.59397	1.5235	-3.1873
	Solyc01g058597	down	-5.12363	-2.33727	14.6046	0.000132594	0.0144356	-2.12442	-1.81214	-1.49247	-4.16498	-4.16498	-4.16498	-4.16498	-3.19557	-4.16498	-1.80968	-4.16498	-3.84184
	Solyc01g079470	up	1.35763	4.0887	24.1307	9.00161e-07	0.000194327	3.44315	4.12136	3.29932	5.34742	5.01996	4.59896	2.78999	2.54194	2.06605	3.62128	4.98878	2.46599
	Solyc01g087270	up	3.11187	-0.830828	23.7769	1.08173e-06	0.000229598	-2.53711	-2.12874	-2.68379	0.66304	-0.144094	0.240705	-4.16498	-4.16498	-2.48133	-2.44988	0.253217	-3.60376
	Solyc01g087690	up	4.83112	-1.42929	24.1664	8.83621e-07	0.000192401	-4.16498	-3.14558	-4.16498	-0.0972355	-1.06769	-0.153308	-2.51409	-4.16498	-4.16498	-3.82518	-0.439412	-3.61468
	Solyc01g087750	up	1.23839	2.82379	17.0975	3.55098e-05	0.00476691	2.39606	2.60114	2.33629	3.99404	3.53478	3.44732	2.06075	0.775147	1.26247	2.4445	3.65871	1.36612
	Solyc01g087780	up	3.45431	-0.75727	30.0712	4.16465e-08	1.23754e-05	-2.58991	-2.55421	-2.68379	0.514868	0.511049	0.0943622	-2.09065	-4.16498	-4.16498	-2.60931	0.373426	-3.47354
	Solyc01g090180	up	1.18774	2.85873	15.7135	7.36954e-05	0.00873896	2.34768	2.78013	1.72335	3.84756	3.40451	3.24827	2.59009	2.02193	2.30082	2.28372	3.50012	2.30428
	Solyc01g090965	up	7.6968	0.909978	137.861	7.81614e-32	2.82029e-28	-3.13782	-4.16498	-4.16498	2.33785	2.22972	2.61554	-4.16498	-4.16498	-4.16498	-3.82259	2.39437	-4.16498
	Solyc01g094090	up	6.09895	-1.87877	22.1574	2.51186e-06	0.000477027	-4.16498	-4.16498	-4.16498	-0.599219	-0.654984	-1.83309	-4.16498	-4.16498	-4.16498	-4.16498	-1.0291	-4.16498
	Solyc01g097860	up	1.30506	6.04903	80.1278	3.50951e-19	4.66543e-16	5.50188	5.43956	5.66925	6.85299	6.92551	6.75045	5.43053	5.06789	5.09412	5.5369	6.84298	5.19751
	Solyc01g102710	up	1.545	1.36919	17.2429	3.28926e-05	0.00446668	0.471606	0.331256	1.29455	2.52851	2.45429	1.778	-0.073102	-0.315729	0.0599202	0.699137	2.2536	-0.109637
	Solyc01g103920	up	1.00688	6.86616	16.536	4.77349e-05	0.00612024	6.23179	6.09863	7.16938	7.63755	7.63883	7.48862	5.8077	5.9115	6.07326	6.49993	7.58833	5.93082
	Solyc01g105050	up	1.09433	8.91317	21.9288	2.82956e-06	0.0005294	8.59559	8.87679	8.38834	10.0841	9.63731	9.3729	8.04038	7.43824	7.36309	8.62024	9.6981	7.6139
	Solyc01g110555	down	-1.88265	2.3835	20.4708	6.05477e-06	0.00101954	3.52521	3.13069	1.76635	1.45834	0.709956	1.09507	2.39118	2.52865	2.43848	2.80742	1.08779	2.45277
	Solyc01g110660	up	1.20662	1.62832	12.7847	0.00034946	0.032451	1.20945	1.08198	1.38008	1.7686	2.53517	2.7781	0.736794	0.419555	0.142838	1.22384	2.36062	0.433062
	Solyc02g032410	up	4.35804	-1.58431	16.6867	4.40899e-05	0.00571089	-4.16498	-4.16498	-3.2421	-1.37557	-0.334456	-0.983986	-2.51409	-1.63137	-4.16498	-3.85735	-0.898004	-2.77015
	Solyc02g032650	up	1.03875	2.30899	13.5507	0.000232206	0.0230908	1.41126	1.48749	1.90747	2.55572	2.87259	2.4912	2.64616	2.58109	1.90909	1.60207	2.63984	2.37878
	Solyc02g063527	up	1.50452	4.65002	42.1936	8.26689e-11	3.86676e-08	3.95046	4.03892	3.8037	5.04462	5.21097	5.90173	3.96013	3.84644	4.30602	3.93102	5.38578	4.03753
	Solyc02g065220	up	1.2408	1.14565	15.2623	9.35655e-05	0.0107422	0.841338	0.515888	0.326968	1.69706	2.05789	1.54767	0.36327	0.729407	0.67573	0.561398	1.76754	0.589469
	Solyc02g067050	up	1.65273	1.85228	27.2807	1.75955e-07	4.53498e-05	0.974755	0.826522	1.63332	2.59561	3.17139	2.64177	0.250012	0.235475	0.366335	1.14487	2.80292	0.283941
	Solyc02g069450	up	1.23898	6.65399	21.2869	3.95432e-06	0.000708356	6.35774	6.52817	6.12537	7.98515	7.47013	7.18239	5.33356	4.35247	4.63492	6.33709	7.54589	4.77365
	Solyc02g069460	up	1.00058	9.00461	18.6237	1.59227e-05	0.00232471	8.7774	8.94274	8.57893	10.1622	9.74498	9.28421	8.17123	7.63866	7.59915	8.76636	9.73045	7.80301
	Solyc02g070940	up	1.21138	9.97421	25.6986	3.99106e-07	9.69291e-05	9.72593	9.78016	9.35192	11.1429	10.7399	10.5873	9.06942	8.33969	8.23611	9.61934	10.8233	8.5484
	Solyc02g070950	up	3.32334	7.03135	141.587	1.19714e-32	5.03955e-29	5.4143	5.14262	4.74287	8.69861	8.36524	8.23629	3.59059	2.8611	2.50268	5.09993	8.43338	2.98479
	Solyc02g070970	up	3.95031	7.56977	134.868	3.52835e-31	1.11399e-27	5.37462	4.88191	4.98738	9.23856	8.99549	8.87879	3.55439	2.38829	2.06605	5.0813	9.03761	2.66958
	Solyc02g070980	up	3.4092	6.50842	245.01	3.17886e-55	4.01458e-51	4.72266	4.14044	4.6571	8.0893	7.94903	7.74976	2.65985	2.16624	1.90909	4.50674	7.92937	2.24506
	Solyc02g070990	up	7.63195	7.20358	1223.89	3.92087e-268	9.90334e-264	1.47271	1.23018	0.768934	8.89984	8.80495	8.6078	0.452265	0.419555	0.221247	1.15727	8.77086	0.364356
	Solyc02g071000	up	3.87702	6.4213	125.703	3.57205e-29	9.02228e-26	4.14606	3.70628	4.13775	8.05339	7.81671	7.76528	2.93208	1.81852	1.22491	3.9967	7.87846	1.99184
	Solyc02g071010	up	2.14501	9.41155	47.9879	4.28847e-12	2.78439e-09	8.65669	8.42962	8.30426	10.9612	10.5709	10.2201	7.52792	6.5602	6.2751	8.46352	10.5841	6.78774
	Solyc02g071020	up	1.54623	6.49929	53.2348	2.95972e-13	2.41824e-10	6.22926	5.66501	5.86024	7.67433	7.30198	7.44751	5.32084	4.6307	4.82238	5.91817	7.47461	4.92464
	Solyc02g071030	up	1.49926	10.4179	45.2212	1.75986e-11	1.01024e-08	10.0012	9.71443	9.99935	11.6217	11.4554	11.1074	9.15761	8.49391	8.34777	9.90501	11.3948	8.66643
	Solyc02g071620	up	1.49731	1.13072	12.5865	0.000388539	0.0349721	-0.794518	0.0413643	0.58889	1.4869	1.86279	1.09507	0.883963	1.65689	1.29909	-0.0547546	1.48159	1.27998
	Solyc02g077430	up	1.51716	4.36734	19.9692	7.87004e-06	0.00126807	3.78949	2.61466	3.42539	4.69675	5.21465	4.61562	4.75598	4.74771	3.70107	3.27652	4.84234	4.40159
	Solyc02g079870	up	1.31523	1.52288	16.9266	3.88539e-05	0.00513807	0.745005	1.08198	1.03806	2.18935	2.59926	1.89167	0.387947	1.0602	0.730376	0.955013	2.22676	0.726173
	Solyc02g081370	up	2.56315	-0.497684	12.8448	0.000338415	0.0316581	-0.962483	-4.16498	-1.73688	-0.149469	0.649868	0.959392	-2.61118	-2.92828	-2.05923	-2.28812	0.486597	-2.5329
	Solyc02g082720	up	2.45032	2.93988	57.5956	3.21949e-14	2.80406e-11	2.19196	1.42733	1.172	3.98906	4.0201	4.25257	1.9086	1.0602	0.930349	1.5971	4.08724	1.29971
	Solyc02g082920	up	3.0479	2.28825	70.0279	5.84729e-17	6.42134e-14	0.931639	0.119478	0.437505	3.08076	3.27706	4.06174	0.513837	0.235475	0.618933	0.496207	3.47319	0.456082
	Solyc02g085770	up	2.52795	-0.0102871	29.4629	5.69962e-08	1.63592e-05	-1.11777	-1.32453	-1.49247	0.859094	1.0796	1.2378	-1.07905	-1.89231	-3.09034	-1.31159	1.05883	-2.02057
	Solyc02g085950	up	2.04464	10.1148	67.1324	2.53871e-16	2.67178e-13	9.02317	9.60376	9.10265	11.6212	11.1617	11.0922	7.80764	6.95922	7.3016	9.24319	11.2917	7.35615
	Solyc02g086650	up	2.23715	3.70092	28.002	1.21193e-07	3.2222e-05	2.78322	3.34094	1.38008	5.30994	4.69866	4.70853	0.250012	0.633332	1.1467	2.50142	4.90571	0.676682
	Solyc02g086820	up	3.00754	0.31475	34.4968	4.26944e-09	1.51884e-06	-1.53502	-0.960753	-1.49247	1.9641	1.07708	1.43217	-3.11525	-1.41047	-2.48133	-1.32942	1.49112	-2.33568
	Solyc02g086970	up	1.71058	5.81257	86.7133	1.25449e-20	1.86387e-17	4.96557	5.12616	4.87904	6.80408	6.30827	6.92494	5.13723	5.07705	4.81637	4.99026	6.6791	5.01022
	Solyc02g086980	up	1.72373	2.58567	34.8415	3.57669e-09	1.29057e-06	1.64276	2.31606	1.38008	3.80283	3.19647	3.56165	1.35688	1.52923	1.22491	1.77963	3.52032	1.37034
	Solyc02g087110	up	1.14918	5.27172	21.8729	2.91322e-06	0.000537097	4.52171	4.56695	5.00984	5.47764	6.2835	5.71164	4.55096	5.21413	5.03173	4.6995	5.82426	4.93228
	Solyc02g091080	up	1.50178	1.7906	22.0094	2.71315e-06	0.000511409	1.24511	0.57253	1.65636	2.54218	2.6726	2.90266	0.387947	0.0244231	0.559808	1.158	2.70581	0.324059
	Solyc03g005760	up	1.03281	11.3245	14.5713	0.000134957	0.0146298	11.085	11.2396	10.7912	12.46	12.0521	11.615	10.7777	9.91769	9.93249	11.0386	12.0424	10.2093
	Solyc03g005770	up	2.5437	9.0185	58.1246	2.46026e-14	2.21933e-11	7.84424	7.92594	7.4531	10.6677	10.2111	9.91709	6.96994	6.05176	5.5835	7.74109	10.2653	6.20173
	Solyc03g005780	up	3.2489	8.26757	61.2829	4.94358e-15	4.8025e-12	6.66114	6.71689	5.69339	10.0477	9.55974	9.32052	5.12806	3.78405	3.73487	6.35714	9.64266	4.21566
	Solyc03g006540	up	1.2882	1.7345	18.5769	1.63187e-05	0.00236884	1.13538	1.26497	1.63332	2.75675	2.6364	2.50556	0.513837	-0.636608	-0.221944	1.34456	2.6329	-0.114905
	Solyc03g007940	down	-1.61847	1.3417	12.9197	0.000325134	0.0308731	1.01662	0.57253	1.78737	-0.184621	-0.492449	-0.346064	2.5168	1.50229	2.18821	1.12551	-0.341044	2.0691
	Solyc03g025190	up	4.51794	-0.40266	44.1489	3.04322e-11	1.56869e-08	-4.16498	-3.14558	-2.28226	0.768937	1.24677	0.601895	-4.16498	-4.16498	-3.09034	-3.19761	0.872533	-3.80677
	Solyc03g026000	up	1.6595	0.462513	12.3532	0.000440226	0.0390799	-1.11777	-0.0412223	-1.30277	1.13652	1.00603	0.306335	0.929862	0.5304	0.366335	-0.820589	0.816293	0.608865
	Solyc03g026050	up	1.46842	2.28065	12.6397	0.000377641	0.0344304	1.66925	1.87296	1.29455	3.78569	2.74239	2.30676	1.45432	1.90336	0.930349	1.61225	2.94495	1.42934
	Solyc03g070390	up	1.11011	3.48794	24.3502	8.03177e-07	0.000179528	2.53217	2.61466	3.29932	3.96895	3.953	3.98185	3.19899	3.58081	3.39767	2.81539	3.96793	3.39249
	Solyc03g095500	up	2.5045	-0.26119	21.7687	3.07569e-06	0.000562941	-0.947111	-1.32453	-2.68379	0.984572	0.613928	0.84708	-2.51409	-3.19557	-1.72541	-1.65181	0.815193	-2.47836
	Solyc03g095650	up	3.57615	1.18125	48.0959	4.05873e-12	2.78439e-09	-2.12442	-1.32453	-0.066854	2.24057	2.42629	2.91346	-2.09102	-3.19557	-2.48133	-1.17194	2.52678	-2.58931
	Solyc03g096250	down	-5.70328	2.55814	26.2937	2.93248e-07	7.33353e-05	2.39606	5.20217	3.00838	-2.18067	-2.22602	-0.568604	-1.76429	-4.16498	-0.0280548	3.53554	-1.65843	-1.98577
	Solyc03g098780	up	1.87372	5.88213	17.9525	2.26484e-05	0.00317807	5.74832	5.21112	3.61962	6.57885	7.47875	6.6906	4.38788	3.79023	3.90487	4.85969	6.91607	4.02766
	Solyc03g111800	up	2.35061	-0.847278	16.282	5.45805e-05	0.00665987	-1.79983	-2.13598	-2.28226	-0.599219	0.341514	0.168775	-2.09102	-1.89231	-2.48133	-2.07269	-0.0296432	-2.15489
	Solyc03g115900	up	1.32479	9.27405	44.4342	2.63047e-11	1.38418e-08	8.83353	8.90847	8.75076	10.4458	10.0698	9.90042	8.39154	7.81905	7.76106	8.83092	10.1387	7.99055
	Solyc03g115980	up	1.43202	7.94951	45.0111	1.95917e-11	1.07516e-08	7.44531	7.30849	7.5673	9.18577	8.83154	8.53765	6.98849	6.38855	6.34468	7.44037	8.85165	6.5739
	Solyc03g119860	up	1.04249	4.86348	30.8496	2.78813e-08	8.48465e-06	4.75292	4.43951	4.52541	5.82668	5.55404	5.45108	4.16132	3.48883	3.70789	4.57261	5.6106	3.78602
	Solyc03g121850	down	-1.78127	2.87373	16.7428	4.28052e-05	0.00557307	3.21944	4.16345	3.85193	1.17213	2.22972	2.40192	0.787537	2.18331	2.3713	3.74494	1.93459	1.78071
	Solyc03g122360	down	-1.08877	2.55518	12.2231	0.000472022	0.0411114	2.54654	2.00229	1.72335	0.768937	0.799989	1.49108	3.28097	3.6923	3.39767	2.09073	1.02	3.45698
	Solyc03g123410	up	4.74349	-0.507612	39.9913	2.55091e-10	1.07385e-07	-2.12442	-4.16498	-4.16498	1.02408	0.456721	0.801263	-4.16498	-2.62095	-4.16498	-3.48479	0.76069	-3.6503
	Solyc04g008370	up	2.16874	-0.975181	13.1358	0.000289701	0.028252	-2.12442	-2.55421	-2.68379	-0.599219	-0.540045	-0.694228	-1.07905	-1.21895	-0.572587	-2.45414	-0.611164	-0.956861
	Solyc04g009860	up	1.29148	4.08341	39.5215	3.24468e-10	1.34351e-07	3.18303	2.3967	3.09525	4.15842	4.40234	4.07624	4.51754	4.6832	4.63133	2.89166	4.21234	4.61069
	Solyc04g011670	up	1.95891	3.97306	148.983	2.8926e-34	1.46122e-30	2.99517	2.83903	2.95363	5.01622	4.83577	4.78702	3.35853	3.38083	3.10892	2.92928	4.87967	3.28276
	Solyc04g050820	down	-1.59878	1.90827	33.1078	8.71871e-09	2.93623e-06	2.54803	2.91447	2.7882	0.860928	1.47961	1.12844	0.838241	1.29453	0.8841	2.75024	1.15633	1.00562
	Solyc04g051690	up	2.57083	-0.12785	14.3821	0.000149211	0.015902	-3.13782	-1.81214	-0.6103	1.33808	1.11265	-0.0657994	-1.76429	-1.41047	-2.05442	-1.85342	0.794977	-1.74306
	Solyc04g071480	down	-1.94351	5.31294	12.768	0.000352605	0.032623	6.88671	6.0584	4.24292	4.47589	4.14131	3.72393	5.37355	5.39896	4.0676	5.72934	4.11371	4.9467
	Solyc04g074350	up	2.28756	1.14975	40.747	1.73272e-10	7.41781e-08	-0.207789	-0.128825	0.326968	2.32209	2.05789	2.37089	0.0147099	-0.898593	-1.23194	-0.00321529	2.25029	-0.705274
	Solyc04g074770	up	1.51838	4.31579	16.4749	4.92982e-05	0.00624444	3.70239	4.46591	2.78616	5.57397	5.3039	5.03727	2.77749	1.81852	2.63747	3.65149	5.30505	2.41116
	Solyc04g074810	down	-1.10275	3.16059	14.3314	0.000153288	0.0162678	4.20609	3.81591	3.98529	2.32209	2.68447	3.48403	1.45432	1.38917	1.81109	4.00243	2.8302	1.55153
	Solyc04g079240	up	3.12298	-1.60917	16.0849	6.05661e-05	0.00731952	-3.13782	-4.16498	-2.68379	-1.01367	-0.91662	-0.453047	-4.16498	-3.19557	-2.48133	-3.32886	-0.794446	-3.28063
	Solyc04g082000	up	1.0138	2.37525	18.151	2.04061e-05	0.00291196	2.11696	2.08257	1.90763	3.30098	2.88293	2.90266	1.86456	1.41835	1.46847	2.03572	3.02885	1.58379
	Solyc04g082010	up	1.02263	8.79018	28.3229	1.02676e-07	2.75893e-05	8.60446	8.66132	8.27156	9.83022	9.46212	9.28825	8.02887	7.54479	7.5833	8.51244	9.52686	7.71899
	Solyc04g150129	up	3.63093	-0.304731	19.8882	8.21062e-06	0.00129708	-1.79983	-4.16498	-4.16498	0.207383	0.280266	-0.346064	0.787537	-0.898593	0.0599202	-3.3766	0.047195	-0.0170453
	Solyc05g005170	down	-1.85828	4.49776	15.5318	8.11288e-05	0.00953093	5.95501	5.92067	4.76421	3.94856	3.05736	4.14205	2.80238	1.50229	0.882894	5.54663	3.71599	1.72919
	Solyc05g006110	up	1.14306	3.2049	27.8626	1.30243e-07	3.42676e-05	2.68279	3.02303	2.77568	4.16152	4.01541	3.69916	2.47096	2.21684	1.88521	2.82717	3.9587	2.191
	Solyc05g007780	up	1.63116	4.35125	96.013	1.14131e-22	2.05909e-19	3.69597	3.57381	3.97158	5.47107	5.34747	5.3373	2.76488	2.24962	2.42198	3.74712	5.38528	2.47883
	Solyc05g008940	up	1.99626	1.13056	16.9771	3.78333e-05	0.00502944	-0.947111	-0.544656	0.725887	1.30638	1.98298	2.22236	0.387947	0.682169	1.18633	-0.255293	1.83724	0.75215
	Solyc05g008950	up	5.42399	-2.08882	12.9223	0.000324684	0.0308731	-4.16498	-4.16498	-4.16498	-2.18067	-1.64801	-0.983986	-4.16498	-1.89231	-4.16498	-4.16498	-1.60422	-3.40742
	Solyc05g008980	up	4.15725	-1.231	13.5035	0.00023812	0.0235653	-2.54391	-4.16498	-4.16498	-1.59746	0.216302	0.0167033	-4.16498	-1.63137	-3.09034	-3.62462	-0.454819	-2.96223
	Solyc05g009310	up	1.83995	0.382867	14.9402	0.000110975	0.0122402	-0.307577	0.0413643	-0.984982	1.4869	1.53593	1.16909	-2.51409	-0.898593	-3.09034	-0.417065	1.39731	-2.16767
	Solyc05g018880	down	-1.91006	-0.205859	13.6271	0.000222946	0.0222576	0.793975	0.57253	0.143454	-1.59746	-0.779879	-1.56964	-0.266595	-0.761662	-1.72541	0.50332	-1.31566	-0.91789
	Solyc05g025890	down	-1.77562	0.558933	13.0858	0.000297538	0.028794	0.887195	1.15798	0.810487	-0.599219	-0.91662	-0.694228	0.736794	-0.222882	1.43691	0.951887	-0.736689	0.650273
	Solyc05g047600	up	1.04069	2.9686	22.7486	1.84635e-06	0.000371241	2.34768	2.23064	2.47235	3.09032	3.62992	3.3943	2.76488	3.11341	2.9453	2.35022	3.37151	2.9412
	Solyc05g050110	up	1.38929	4.22766	45.7629	1.33465e-11	7.93943e-09	3.62331	3.38905	4.14256	5.05727	5.12167	5.24191	2.77749	3.0682	2.63747	3.71831	5.14028	2.82772
	Solyc05g053400	up	1.08482	1.96498	12.9021	0.000328221	0.0310494	1.45482	1.41326	1.54566	2.85428	1.90083	2.71255	1.67874	1.44486	1.50576	1.47125	2.48922	1.54312
	Solyc05g054750	up	1.56298	1.64051	31.8386	1.67531e-08	5.35632e-06	1.24511	1.33572	1.03806	2.58244	2.7989	2.8586	-4.16498	-4.16498	-3.09034	1.2063	2.74665	-3.80677
	Solyc05g054820	up	1.98971	0.08592	15.1533	9.91255e-05	0.011278	-2.12442	-0.222093	-0.984982	1.17213	1.0406	0.654379	-0.490119	-1.41047	-1.23194	-1.1105	0.955704	-1.04418
	Solyc05g056050	up	1.52801	7.38422	38.2474	6.23194e-10	2.53881e-07	6.81397	6.87952	6.82653	8.63898	8.33589	8.07312	6.34835	5.50109	5.36523	6.84001	8.34933	5.73823
	Solyc05g056060	up	1.14085	8.3068	52.4321	4.45388e-13	3.40897e-10	7.88662	8.07114	7.82888	9.28925	8.97575	8.92742	7.61229	7.23112	7.27087	7.92888	9.06414	7.37143
	Solyc06g005910	up	1.15065	1.93498	12.0588	0.00051548	0.0444368	1.05863	1.68023	1.72335	2.25725	3.00152	2.61554	1.32288	0.476042	1.26247	1.4874	2.62477	1.02047
	Solyc06g006022	up	1.20468	1.33404	16.4913	4.88747e-05	0.00623473	1.17289	0.456931	1.03806	2.0238	2.24583	2.03712	0.0974822	0.168497	0.366335	0.889294	2.10225	0.210771
	Solyc06g007160	up	1.41924	1.57543	19.8749	8.26787e-06	0.00129708	1.31388	1.15798	0.850996	2.24057	2.57514	2.69285	0.250012	-0.222882	-1.06667	1.10762	2.50285	-0.346512
	Solyc06g009110	up	1.00247	3.63727	11.888	0.000564969	0.0478859	2.65655	3.44321	2.70029	4.38777	3.98214	3.3943	3.80278	3.91295	3.52678	2.93335	3.9214	3.7475
	Solyc06g035940	down	-10.9158	5.66991	34.1295	5.15626e-09	1.80884e-06	7.50218	-0.960753	8.09906	-3.17542	-2.22602	-4.16498	-3.11525	-1.63137	-2.48133	4.88016	-3.18881	-2.40932
	Solyc06g048770	up	3.21612	-0.338232	23.4909	1.25505e-06	0.000264166	-1.79983	-3.14558	-3.2421	-0.290382	0.709956	-0.0657994	-0.266595	0.235475	-0.572587	-2.72917	0.117925	-0.201236
	Solyc06g053830	up	1.37709	2.48291	24.7531	6.5163e-07	0.000149626	1.86529	1.60076	2.20181	3.18923	3.5863	2.99713	1.3901	1.96386	1.43691	1.88928	3.25755	1.59696
	Solyc06g062295	down	-7.44942	-0.94603	41.7659	1.02885e-10	4.72484e-08	0.887195	-0.32181	0.207255	-4.16498	-4.16498	-4.16498	-4.16498	-4.16498	-4.16498	0.257546	-4.16498	-4.16498
	Solyc06g062370	up	3.63207	0.98909	21.8815	2.90012e-06	0.000537097	-1.53502	-0.544656	-1.49247	1.39946	3.43995	0.976396	-4.16498	-3.19557	-4.16498	-1.19072	1.9386	-3.84184
	Solyc06g062380	up	5.18423	4.03833	108.88	1.72393e-25	3.95846e-22	-0.656533	1.36456	-0.226287	5.57893	5.90611	5.09774	-2.09102	-2.21111	-1.03679	0.16058	5.52759	-1.77964
	Solyc06g062390	up	3.43047	-0.159584	19.6403	9.34764e-06	0.00143965	-1.79983	-1.81214	-2.68379	0.721654	1.96371	-0.346064	-3.11525	-3.19557	-3.09034	-2.09859	0.779767	-3.13372
	Solyc06g063370	up	1.00077	10.4346	31.2145	2.31032e-08	7.20422e-06	10.134	10.2096	10.1315	11.438	11.113	10.8714	9.78761	9.30989	9.33195	10.1584	11.1408	9.47648
	Solyc06g066750	down	-2.66615	1.13068	22.9077	1.69972e-06	0.000349036	2.88843	2.61466	1.29455	0.399902	-1.23645	-0.153308	-2.09102	-2.21111	-2.48133	2.26588	-0.329953	-2.26115
	Solyc06g068440	down	-1.06693	4.42946	15.3672	8.85102e-05	0.0102082	5.19439	4.20883	5.54655	4.00396	4.05709	4.00228	3.82116	3.76211	3.90487	4.98326	4.02111	3.82938
	Solyc06g069730	up	2.68306	5.45138	51.3967	7.5466e-13	5.60624e-10	4.54767	4.19536	3.32831	7.09947	6.65095	6.55006	2.43958	1.13227	1.22491	4.02378	6.76683	1.59892
	Solyc06g071030	up	1.45512	1.30536	13.4725	0.000242083	0.0237919	1.0573	0.119478	0.437505	1.96404	2.02092	2.05675	1.0594	-0.222882	1.10595	0.538096	2.01391	0.647488
	Solyc06g072460	up	2.01966	-0.712101	12.2359	0.000468784	0.0409708	-2.12442	-1.81214	-1.49247	-0.0148423	0.341514	-0.246469	-1.49806	-1.0499	-3.09034	-1.80968	0.0267342	-1.87943
	Solyc06g073290	up	1.15251	5.36816	36.4521	1.56467e-09	6.08008e-07	5.05646	5.06331	5.08283	6.29003	6.28155	6.07507	4.41541	3.6923	3.66646	5.06753	6.21555	3.92472
	Solyc06g082950	up	1.01776	7.89808	28.8089	7.98827e-08	2.24186e-05	7.62993	7.63751	7.5648	8.89697	8.61371	8.31736	7.28261	6.846	6.66531	7.61075	8.60935	6.93131
	Solyc07g005370	up	1.30689	4.64287	52.926	3.4636e-13	2.73386e-10	4.01278	4.32053	3.66577	5.43064	5.11949	5.40969	4.11737	4.19962	4.27481	3.99969	5.31994	4.19727
	Solyc07g006380	down	-1.08438	12.3782	15.0507	0.00010466	0.0115943	12.9996	12.8778	11.6216	11.5026	11.5958	11.5023	12.6709	12.7543	12.7133	12.4996	11.5336	12.7129
	Solyc07g008140	up	1.36323	3.06998	12.0828	0.000508891	0.0440191	2.53217	0.57253	2.18606	3.33774	3.40451	3.24827	3.40802	3.81781	3.05642	1.76359	3.33017	3.42742
	Solyc07g008210	up	2.58363	1.67053	47.983	4.29927e-12	2.78439e-09	-0.947111	0.456931	-0.226287	2.33785	2.1291	2.65471	1.83813	1.32911	1.86092	-0.238822	2.37389	1.67605
	Solyc07g008545	up	3.18713	1.69088	42.4752	7.15844e-11	3.41147e-08	-0.0242524	0.122289	-0.608321	3.15604	3.15797	2.51217	0.453774	-1.21662	-1.72541	-0.170095	2.94206	-0.82942
	Solyc07g009470	up	1.06331	3.18058	15.8931	6.70223e-05	0.00802298	2.85421	1.89534	2.03602	3.45802	3.5672	3.06655	3.53225	3.6252	3.45558	2.26185	3.36392	3.53767
	Solyc07g020870	up	1.95232	1.30895	15.8223	6.95769e-05	0.0082895	0.0558336	-0.321707	0.268353	1.66032	2.52204	1.30662	1.25238	1.86157	0.295614	0.000826459	1.82966	1.13652
	Solyc07g025140	up	6.8967	-1.33666	35.3875	2.70222e-09	1.00372e-06	-4.16498	-4.16498	-4.16498	-0.184621	-0.779879	0.239194	-4.16498	-4.16498	-3.09034	-4.16498	-0.241769	-3.80677
	Solyc07g043460	up	1.38742	6.06569	12.9802	0.000314807	0.0301189	5.95758	5.98074	4.47122	7.18701	6.82186	6.98445	5.01495	3.73921	4.56147	5.46984	6.99777	4.43854
	Solyc07g047850	up	1.77852	10.2641	74.8822	4.99646e-18	6.00955e-15	9.58274	9.55698	9.56606	11.6935	11.2714	10.9881	8.67173	8.11887	8.16854	9.56859	11.3177	8.31971
	Solyc07g049600	up	3.13475	-0.875325	19.1593	1.20249e-05	0.00181871	-2.54391	-2.13598	-3.2421	0.274451	-0.433591	0.37049	-1.76429	-4.16498	-1.72541	-2.64066	0.0704499	-2.55156
	Solyc07g052070	up	3.95539	-0.274984	44.9701	2.00065e-11	1.07516e-08	-3.13782	-2.13598	-2.68379	1.27397	0.709956	0.601895	-2.09102	-1.63137	-2.05442	-2.65253	0.861941	-1.9256
	Solyc07g052790	up	3.82343	-1.4048	13.1928	0.000281032	0.0275128	-2.54391	-4.16498	-4.16498	-1.01367	0.0982577	-1.17262	-4.16498	-1.63137	-2.48133	-3.62462	-0.69601	-2.75923
	Solyc07g054770	down	-1.2651	2.40863	16.7513	4.26131e-05	0.00557307	3.28085	2.97131	2.19906	1.62179	1.61248	1.6546	2.21701	2.69256	2.26425	2.81707	1.62962	2.39127
	Solyc07g063600	up	1.58437	8.50455	40.9901	1.53003e-10	6.66301e-08	8.09907	8.20999	7.57396	9.87672	9.44567	9.33033	6.63375	6.16554	5.77651	7.96101	9.55091	6.19193
	Solyc07g065900	up	2.59424	5.69323	84.363	4.11779e-20	5.77817e-17	3.84864	4.06818	5.03078	7.03021	7.16034	6.8031	2.53183	2.28166	2.28265	4.31587	6.99788	2.36538
	Solyc07g066150	up	1.05633	8.60506	22.5761	2.01983e-06	0.00039857	8.36257	8.42423	8.25733	9.78264	9.30911	9.02213	7.72682	7.21574	7.01833	8.34804	9.37129	7.3203
	Solyc08g007250	up	1.56264	2.16331	49.3006	2.19601e-12	1.58476e-09	1.53165	1.57326	1.5619	3.06213	3.09341	3.15117	0.883963	0.862494	0.498155	1.5556	3.10224	0.748204
	Solyc08g048315	up	5.22703	-1.44791	16.5655	4.69993e-05	0.00605668	-4.16498	-4.16498	-4.16498	-1.37557	-1.4276	-2.57171	-0.754739	-1.0499	-0.572587	-4.16498	-1.79163	-0.792408
	Solyc08g067320	up	1.36276	2.16585	14.4952	0.000140519	0.0151676	1.6549	2.24174	1.32432	3.06495	2.63636	3.56619	-0.073102	0.419555	-0.572587	1.74032	3.08917	-0.0753779
	Solyc08g067330	up	1.40416	2.18659	25.2345	5.07668e-07	0.000118907	1.8777	1.85861	1.35213	2.94094	2.81979	3.46461	0.629618	0.729407	0.618933	1.69615	3.07511	0.659319
	Solyc08g067935	up	2.21009	0.279849	14.2237	0.000162315	0.0169577	-0.656533	-1.81214	-1.9685	0.33854	0.884732	0.801263	-0.266595	0.235475	1.29909	-1.47906	0.674845	0.422656
	Solyc08g074630	down	-1.39786	2.00411	16.41	5.10146e-05	0.00637885	2.68279	2.42774	2.93491	1.13652	1.39858	1.40179	2.16038	0.944853	1.1467	2.68181	1.3123	1.41731
	Solyc08g075540	up	1.4503	1.97513	17.9099	2.31613e-05	0.00323209	0.887195	1.39629	1.35213	2.69688	3.02971	2.11409	0.974346	1.84021	1.6784	1.21187	2.61356	1.49765
	Solyc08g076290	up	1.0439	6.1869	23.0032	1.61735e-06	0.000334844	6.04488	5.78934	5.97462	7.31647	6.83546	6.72874	5.31239	4.54481	4.81005	5.93628	6.96022	4.88908
	Solyc08g079820	up	1.69811	4.03464	22.5867	2.00869e-06	0.00039857	3.48724	1.75555	2.18606	4.5076	4.24913	4.31663	4.63995	4.33176	4.40754	2.47628	4.35778	4.45975
	Solyc08g083360	up	1.88405	5.47946	100.144	1.41726e-23	2.75362e-20	4.57171	4.93422	4.73202	6.79851	6.56065	6.53308	3.14163	2.35879	2.92202	4.74598	6.63075	2.80748
	Solyc09g005090	up	2.61921	-0.506933	22.5394	2.05878e-06	0.000400005	-3.13782	-1.32453	-1.9685	0.458761	0.662789	0.0167033	-1.49806	-1.63137	-1.45768	-2.14362	0.379418	-1.52904
	Solyc09g008420	up	7.90268	-0.572231	62.5601	2.58434e-15	2.61101e-12	-4.16498	-4.16498	-4.16498	0.622169	0.563405	1.09507	-4.16498	-4.16498	-4.16498	-4.16498	0.760214	-4.16498
	Solyc09g018890	up	2.27246	2.42822	91.2391	1.27318e-21	2.00987e-18	1.01662	1.39629	1.46083	3.66114	3.39009	3.60896	0.572889	0.862494	0.783028	1.29124	3.5534	0.73947
	Solyc09g060100	up	1.15039	3.65129	31.4563	2.03981e-08	6.44018e-06	3.1269	3.2996	3.17719	4.61177	4.15417	4.23975	3.28097	2.93349	2.66578	3.20123	4.33523	2.96008
	Solyc09g063130	up	1.02421	8.01757	41.6558	1.08844e-10	4.90926e-08	7.64675	7.80185	7.83617	9.00516	8.73174	8.59669	7.09142	6.87321	6.64054	7.76159	8.77787	6.86839
	Solyc09g075970	down	-1.49668	2.65563	14.6535	0.000129197	0.0141544	3.63048	4.14955	3.21648	2.0238	1.33976	2.90266	-0.166607	-0.135651	-0.221944	3.6655	2.08874	-0.174734
	Solyc09g082300	down	-6.19783	-1.67218	14.1517	0.000168649	0.0174438	-1.31137	-3.14558	0.207255	-4.16498	-4.16498	-4.16498	-4.16498	-2.62095	-2.48133	-1.41657	-4.16498	-3.08909
	Solyc09g083435	up	1.88969	3.57959	26.0372	3.34906e-07	8.29319e-05	3.09794	2.9818	1.67902	4.68999	4.69604	4.36313	1.52382	2.54194	2.65169	2.58625	4.58305	2.23915
	Solyc09g084470	up	6.40325	5.99184	200.175	1.91232e-45	1.61005e-41	1.0573	1.23018	1.172	7.57771	7.67398	7.30381	2.78999	0.682169	1.78551	1.15316	7.5185	1.75255
	Solyc09g090730	up	3.154	0.661754	58.5289	2.0033e-14	1.87405e-11	-0.794518	-1.54784	-0.984982	1.98085	2.11162	1.70523	-1.76429	-2.62095	-2.48133	-1.10911	1.93257	-2.28886
	Solyc10g006530	up	1.12178	1.34786	16.3105	5.3766e-05	0.00660144	1.01662	1.12048	1.07273	2.33785	2.09393	2.07612	0.0147099	-0.636608	-0.329626	1.06994	2.1693	-0.317175
	Solyc10g006900	up	2.44167	6.86105	42.568	6.82672e-11	3.31595e-08	6.05247	5.80425	5.07755	8.6068	7.91501	7.75202	4.48716	3.50818	3.14959	5.64476	8.09128	3.71498
	Solyc10g008020	up	1.43047	4.81813	94.5775	2.35679e-22	3.96851e-19	4.37775	4.17264	4.35982	5.83922	5.69511	5.66444	3.63303	3.22475	3.62379	4.30341	5.73292	3.49386
	Solyc10g008160	up	1.35613	4.78479	20.275	6.70725e-06	0.00110727	4.4433	4.06325	4.84664	6.08203	5.73183	5.67564	2.14099	0.729407	0.976293	4.45106	5.82984	1.28223
	Solyc10g050323	up	1.62153	1.22436	19.7993	8.60156e-06	0.0013411	0.278646	-0.960753	0.437505	1.4292	1.5619	1.84727	1.35688	1.55568	1.43691	-0.0815338	1.61279	1.44982
	Solyc10g050325	up	5.59676	0.552569	45.0443	1.92632e-11	1.07516e-08	-2.54391	-4.16498	-4.16498	0.207039	1.30952	1.51962	0.233929	0.705178	1.67835	-3.62462	1.01206	0.872484
	Solyc10g054870	up	1.19495	4.52437	24.2115	8.63145e-07	0.000189577	4.09812	4.28283	4.06924	5.74556	5.24901	4.92159	3.74618	2.93349	3.32851	4.15006	5.30539	3.33606
	Solyc10g055570	down	-8.14642	-0.289404	13.8417	0.000198871	0.0202544	-4.16498	-1.54856	2.50166	-4.16498	-4.16498	-4.16498	-4.16498	-3.19557	-4.16498	-1.07063	-4.16498	-3.84184
	Solyc10g055580	down	-7.98101	1.22682	17.6105	2.71094e-05	0.00374169	-4.16498	0.77932	4.12685	-3.17542	-4.16498	-4.16498	-3.11525	-3.19557	-3.09034	0.247064	-3.83513	-3.13372
	Solyc10g075150	up	2.56619	6.71715	24.4481	7.63378e-07	0.000172155	5.44781	5.11428	5.8602	7.78096	7.96474	8.39773	1.0594	-1.41047	-2.05442	5.4741	8.04781	-0.801831
	Solyc10g076740	up	1.2644	4.49103	23.921	1.0037e-06	0.000214843	3.19229	2.38093	3.06974	3.89629	4.05252	4.52339	5.00679	5.37777	5.67743	2.88099	4.1574	5.354
	Solyc10g077040	up	1.57689	8.39372	72.5994	1.58826e-17	1.82347e-14	7.78861	7.62708	7.98301	9.53374	9.39016	9.20888	7.21934	6.69251	6.61444	7.79957	9.37759	6.8421
	Solyc10g084590	up	4.92639	-0.802183	29.9602	4.40997e-08	1.2952e-05	-3.13782	-3.14558	-4.16498	1.06254	0.400267	-0.453047	-4.16498	-4.16498	-4.16498	-3.48279	0.336588	-4.16498
	Solyc10g085120	up	4.76204	-2.08513	12.1231	0.000498024	0.0432271	-4.16498	-4.16498	-4.16498	-2.18067	-2.22602	-1.83309	-2.51409	-2.21111	-1.45768	-4.16498	-2.07993	-2.06096
	Solyc10g086250	up	9.78315	1.1211	131.655	1.78037e-30	4.99651e-27	-4.16498	-4.16498	-4.16498	2.08112	2.7537	2.92419	-4.16498	-4.16498	-4.16498	-4.16498	2.58634	-4.16498
	Solyc10g086720	up	2.38911	-0.297872	15.425	8.5843e-05	0.00994598	-1.53502	-2.55421	-0.724712	0.859094	0.216302	1.23949	-4.16498	-3.19557	-3.09034	-1.60465	0.771628	-3.48363
	Solyc11g011210	down	-1.07055	2.94799	14.1668	0.000167295	0.0173891	3.85442	4.17721	3.36988	2.55572	2.57397	3.11417	0.736794	1.26643	0.498155	3.80051	2.74795	0.833793
	Solyc11g040340	down	-1.21305	2.08726	12.3454	0.000442084	0.0390799	3.16463	3.16793	2.16916	1.67241	1.39858	1.97657	0.387947	1.0602	1.10595	2.83391	1.68252	0.851363
	Solyc11g067270	up	2.09794	3.20001	19.8819	8.23766e-06	0.00129708	0.278646	1.89534	1.20362	3.9016	3.38282	2.35513	4.39608	3.7218	3.37212	1.12587	3.21318	3.83
	Solyc11g069020	up	3.18749	-0.726032	22.7428	1.85194e-06	0.000371241	-4.16498	-1.81214	-2.28226	0.515312	0.400267	0.0947421	-1.76429	-2.62095	-4.16498	-2.75313	0.336774	-2.85007
	Solyc12g006140	up	2.53694	8.00551	105.652	8.78694e-25	1.84951e-21	6.88589	6.58413	6.80602	9.55456	9.21204	9.09502	5.4892	4.71288	4.51553	6.75868	9.28721	4.90587
	Solyc12g007045	up	3.10238	-1.78268	12.6332	0.000378956	0.0344304	-4.16498	-4.16498	-2.68379	-1.01367	-1.4276	-1.34695	-2.51409	-1.89231	-3.09034	-3.67125	-1.26274	-2.49891
	Solyc12g008980	up	1.12483	4.8261	30.8674	2.76274e-08	8.48465e-06	4.62343	4.4885	4.425	5.95363	5.5765	5.30893	3.93245	3.54925	3.28353	4.51231	5.61302	3.58841
	Solyc12g009190	up	4.56684	-1.61129	15.1355	0.000100066	0.0113023	-4.16498	-3.14558	-4.16498	-0.377078	-0.0723553	-2.15563	-4.16498	-4.16498	-3.09034	-3.82518	-0.868356	-3.80677
	Solyc12g009200	up	1.15668	2.02615	19.9663	7.88212e-06	0.00126807	1.84219	1.80362	1.70137	2.8695	2.69624	3.17831	0.320628	-0.414965	-0.221944	1.78239	2.91468	-0.105427
	Solyc12g011280	up	1.32537	6.93127	36.2731	1.71511e-09	6.56369e-07	6.66483	6.58348	6.42372	8.17007	7.76771	7.66885	5.58514	4.86605	4.8005	6.55734	7.86888	5.08389
	Solyc12g019550	up	1.36556	4.19767	46.1598	1.08991e-11	6.7144e-09	3.98669	3.8334	3.51005	5.32979	5.11949	4.98187	2.57573	2.69256	1.97846	3.77671	5.14372	2.41558
	Solyc12g035192	down	-5.75052	-2.08716	20.989	4.61935e-06	0.000796627	-1.11777	-0.960753	-1.71094	-4.16498	-4.16498	-4.16498	-4.16498	-4.16498	-4.16498	-1.26316	-4.16498	-4.16498
	Solyc12g044280	up	1.79771	5.88612	174.462	7.84504e-40	4.95375e-36	5.16238	5.15889	5.23123	7.10952	6.97958	6.84181	3.98231	3.85022	3.72222	5.18417	6.97697	3.85159
	Solyc12g088170	up	6.78303	0.0799591	76.7198	1.97017e-18	2.48813e-15	-3.13782	-4.16498	-4.16498	1.06254	1.77671	1.57515	-4.16498	-4.16498	-4.16498	-3.82259	1.47147	-4.16498
	Solyc12g098580	up	4.33515	-1.3807	17.2771	3.23051e-05	0.0044106	-3.13782	-4.16498	-4.16498	-1.37557	-0.0723553	-1.56964	-1.2734	-2.21111	-1.23194	-3.82259	-1.00585	-1.57215
	Solyc12g098590	up	7.27712	-1.05926	26.4449	2.71167e-07	6.84914e-05	-4.16498	-4.16498	-4.16498	-0.184621	1.07708	-1.34695	-4.16498	-4.16498	-4.16498	-4.16498	-0.151498	-4.16498
	Solyc12g100010	up	5.13456	-2.29068	13.7315	0.000210887	0.0212215	-4.16498	-4.16498	-4.16498	-1.59746	-2.63415	-1.34695	-4.16498	-3.19557	-3.09034	-4.16498	-1.85952	-3.48363

## Sheet: Table S4
	Table S4. Differentially expressed genes in the stem part of CR-Slglk2-4 (CR4) fruit compared to tip part of CR-Slglk2-4 (CR4) fruit at 15 days after pollination.
																	average
	gene_id	CR-Slglk2-4_stem - CR-Slglk2-4_tip	logFC	logCPM	LR	PValue	FDR	u_stem_rep1	u_stem_rep2	u_stem_rep3	CR4_stem_rep1	CR4_stem_rep2	CR4_stem_rep3	CR4_tip_rep1	CR4_tip_rep2	CR4_tip_rep3	WT_stem	u_d13_stem	u_d13_tip
	Solyc00g025290	down	-4.51604	-2.6341	8.92818	0.00280804	0.0470328	-4.16498	-4.16498	-4.16498	-4.16498	-4.16498	-4.16498	-3.11525	-1.63137	-2.48133	-4.16498	-4.16498	-2.40932
	Solyc00g500195	down	-4.51352	-2.57961	8.94249	0.00278613	0.0467279	-3.13782	-4.16498	-4.16498	-4.16498	-4.16498	-4.16498	-2.51409	-1.63137	-3.09034	-3.82259	-4.16498	-2.41193
	Solyc00g500299	down	-4.87711	-2.20364	9.93272	0.00162367	0.0312343	-4.16498	-1.77181	-2.48475	-4.16498	-4.16498	-4.16498	-2.02403	-1.32055	-3.23445	-2.80718	-4.16498	-2.19301
	Solyc00g500314	down	-5.14217	-2.24494	9.30316	0.00228759	0.0407475	-4.16498	-4.16498	-1.9685	-4.16498	-4.16498	-4.16498	-1.76429	-3.19557	-1.03679	-3.43282	-4.16498	-1.99888
	Solyc01g006330	up	2.56111	2.55437	64.1757	1.13805e-15	2.39541e-13	2.53217	2.26542	1.88814	3.69679	3.23733	3.315	1.35688	0.944853	0.142838	2.22858	3.41637	0.814858
	Solyc01g006540	up	2.97294	6.9678	35.172	3.01837e-09	2.61089e-07	8.32581	7.94711	7.24458	7.70321	6.22174	6.27812	4.68143	3.1914	3.49557	7.83916	6.73436	3.78946
	Solyc01g006555	up	1.34814	4.52534	23.1643	1.48733e-06	8.23838e-05	4.30654	3.48807	4.12811	5.50408	5.16256	5.01235	4.26477	3.24114	4.00247	3.97424	5.22633	3.83612
	Solyc01g008510	up	6.84628	2.19674	85.55	2.25918e-20	7.13278e-18	-0.794518	-0.670476	1.43441	3.30603	3.71916	3.7054	-2.51409	-3.19557	-2.48133	-0.0101945	3.57686	-2.73033
	Solyc01g008540	down	-3.44088	0.183676	28.4686	9.52325e-08	6.8118e-06	0.133991	-0.222093	-1.9685	-1.8598	-2.63415	-1.56964	1.63144	0.984334	0.882894	-0.685536	-2.02119	1.16622
	Solyc01g008670	up	5.99006	-1.35985	23.6051	1.18271e-06	6.66805e-05	-0.5306	-1.54784	-1.71094	-1.37557	-0.779879	-0.983986	-4.16498	-4.16498	-4.16498	-1.26313	-1.04648	-4.16498
	Solyc01g008800	down	-1.00062	1.79651	10.511	0.00118666	0.0246892	1.13538	0.119478	0.850996	1.24082	1.36947	1.89167	2.42362	2.43201	2.67973	0.701953	1.50065	2.51179
	Solyc01g009830	down	-1.89058	0.0721627	9.53048	0.00202087	0.0370683	0.0694226	-1.35781	-0.155722	-1.16701	-0.317502	-2.06629	0.53846	1.36745	0.12769	-0.481369	-1.1836	0.677866
	Solyc01g010755	up	2.49948	-0.350005	9.12964	0.00251501	0.0433315	0.347319	0.404725	-0.963607	0.56604	-0.306842	-0.927966	-4.16498	-1.21823	-3.09034	-0.0705207	-0.222923	-2.82452
	Solyc01g014320	up	4.50365	0.188184	50.9233	9.6047e-13	1.40229e-10	-2.54391	-2.55421	-2.68379	1.51491	1.53593	1.51965	-4.16498	-4.16498	-1.23194	-2.59397	1.5235	-3.1873
	Solyc01g017600	up	5.1278	1.68075	50.9561	9.44553e-13	1.38707e-10	3.3884	1.80367	1.53729	1.902	2.11162	1.54767	-2.09102	-2.62095	-4.16498	2.24312	1.85376	-2.95898
	Solyc01g056780	up	1.05862	4.84601	45.2182	1.76258e-11	2.2948e-09	4.88026	4.83061	4.67393	5.54207	5.16491	5.15351	4.40643	4.13969	4.16503	4.79493	5.28683	4.23705
	Solyc01g057000	down	-1.00158	7.12158	12.2012	0.000477587	0.0118496	6.73575	6.38725	7.43711	6.26374	7.03724	6.46033	7.32049	7.57732	7.92004	6.85337	6.5871	7.60595
	Solyc01g057300	down	-1.38485	0.451949	11.5734	0.000669005	0.0155453	-0.0268016	-0.428935	-0.405554	-0.861902	0.280266	-0.153308	0.929862	1.44684	1.06401	-0.287097	-0.244981	1.1469
	Solyc01g059965	up	4.11896	4.11363	23.6781	1.13874e-06	6.46343e-05	4.40347	3.83779	5.49253	1.09292	5.23294	4.92709	-0.374032	0.944853	0.559808	4.57793	3.75098	0.376876
	Solyc01g060020	up	8.16677	1.31801	16.1566	5.83142e-05	0.00205712	-0.185213	-0.297039	3.73872	2.00834	-4.16498	1.05424	-4.16498	-4.16498	-4.16498	1.08549	-0.367466	-4.16498
	Solyc01g066190	up	3.58638	-1.63531	9.38795	0.00218417	0.0393024	-0.794518	-2.13598	-1.9685	-0.599219	-2.22602	-2.15563	-3.11525	-4.16498	-4.16498	-1.633	-1.66029	-3.81507
	Solyc01g067440	up	1.41431	3.18847	15.4434	8.50121e-05	0.00283471	4.10299	3.62157	2.57265	3.42888	3.50163	3.50562	1.86201	2.51523	1.70593	3.4324	3.47871	2.02772
	Solyc01g067860	down	-4.54549	-0.414137	29.6211	5.25296e-08	3.84578e-06	-2.54391	-4.16498	-4.16498	-2.18067	-3.20539	-4.16498	-0.073102	1.13227	1.36964	-3.62462	-3.18368	0.809603
	Solyc01g068630	down	-1.63777	1.29003	13.642	0.000221186	0.00632698	1.24511	0.193579	-0.144369	-0.0972355	0.456721	0.976396	1.65896	2.24962	2.34075	0.43144	0.445294	2.08311
	Solyc01g079130	up	5.15403	-1.20475	9.02395	0.00266466	0.0451098	0.345875	-0.808326	-0.984982	-4.16498	-3.20539	-0.453047	-4.16498	-4.16498	-4.16498	-0.482478	-2.6078	-4.16498
	Solyc01g079180	up	3.3739	-0.666429	16.529	4.79111e-05	0.00173621	-1.53502	-1.54784	-0.724712	-0.72459	-0.654984	1.09507	-3.11525	-2.62095	-2.48133	-1.26919	-0.0948353	-2.73918
	Solyc01g079470	up	2.53389	4.0887	75.5603	3.54422e-18	9.04241e-16	3.44315	4.12136	3.29932	5.34742	5.01996	4.59896	2.78999	2.54194	2.06605	3.62128	4.98878	2.46599
	Solyc01g079790	up	1.55989	4.98791	72.3566	1.7962e-17	4.3208e-15	4.85741	5.00791	4.79047	5.76828	5.51303	5.53045	4.39609	3.98771	3.6804	4.88526	5.60392	4.0214
	Solyc01g080220	down	-1.33303	2.22919	24.0123	9.57209e-07	5.53253e-05	1.61577	1.80367	2.00044	1.3691	1.79871	1.51965	2.60432	3.24114	2.74754	1.80663	1.56249	2.86433
	Solyc01g080280	up	1.46707	8.33392	73.5841	9.64403e-18	2.38813e-15	8.31911	8.35415	8.44607	9.12845	8.83852	8.58357	7.62986	7.17781	7.35824	8.37311	8.85018	7.38863
	Solyc01g080680	down	-2.22903	4.90713	37.7119	8.20011e-10	8.15426e-08	3.78949	5.0999	4.11985	3.01388	4.04018	3.51983	5.34207	5.95811	6.03442	4.33641	3.52463	5.7782
	Solyc01g087040	up	1.58002	3.94705	65.4611	5.92731e-16	1.25808e-13	3.86592	4.02317	3.81144	4.60852	4.62666	4.37491	3.25416	3.02152	2.53013	3.90018	4.5367	2.93527
	Solyc01g087050	up	2.81257	-1.2274	8.85752	0.00291883	0.0485026	-0.207789	-0.670476	-1.13515	-1.59746	-2.22602	-0.831845	-4.16498	-2.62095	-4.16498	-0.671137	-1.55178	-3.6503
	Solyc01g087270	up	4.6769	-0.830828	35.9001	2.077e-09	1.8343e-07	-2.53711	-2.12874	-2.68379	0.66304	-0.144094	0.240705	-4.16498	-4.16498	-2.48133	-2.44988	0.253217	-3.60376
	Solyc01g087690	up	3.97449	-1.42929	19.564	9.7286e-06	0.000431097	-4.16498	-3.14558	-4.16498	-0.0972355	-1.06769	-0.153308	-2.51409	-4.16498	-4.16498	-3.82518	-0.439412	-3.61468
	Solyc01g087750	up	2.2394	2.82379	50.0696	1.48389e-12	2.11752e-10	2.39606	2.60114	2.33629	3.99404	3.53478	3.44732	2.06075	0.775147	1.26247	2.4445	3.65871	1.36612
	Solyc01g087780	up	4.27148	-0.75727	36.6516	1.41242e-09	1.30677e-07	-2.58991	-2.55421	-2.68379	0.514868	0.511049	0.0943622	-2.09065	-4.16498	-4.16498	-2.60931	0.373426	-3.47354
	Solyc01g087970	up	1.24949	0.891508	12.2961	0.000453899	0.0113736	0.793975	0.826522	0.850996	1.30638	1.00319	1.6286	0.387947	-0.414965	0.295614	0.823831	1.31272	0.0895321
	Solyc01g088160	up	1.60993	2.85081	20.9409	4.73684e-06	0.000227458	3.73411	3.48807	2.58471	3.28178	2.81976	3.11417	1.9086	1.52923	0.833825	3.26896	3.07191	1.42388
	Solyc01g089960	up	3.56901	0.627819	19.1254	1.22405e-05	0.00052402	1.24511	1.42733	0.850996	-0.72459	0.0791806	2.07612	-3.11525	-1.89231	-2.05442	1.17448	0.476904	-2.354
	Solyc01g090180	up	1.20984	2.85873	16.208	5.67525e-05	0.00201328	2.34768	2.78013	1.72335	3.84756	3.40451	3.24827	2.59009	2.02193	2.30082	2.28372	3.50012	2.30428
	Solyc01g090340	up	1.15765	4.71257	22.2979	2.33457e-06	0.00012362	4.92548	4.87629	4.07352	5.41586	4.98784	5.13747	4.18044	3.64381	4.21913	4.6251	5.18039	4.01446
	Solyc01g090460	up	1.37126	2.11958	20.7992	5.1003e-06	0.000242605	1.50248	1.77981	2.44614	2.6216	2.67291	2.74218	1.4854	1.02276	1.43691	1.90948	2.6789	1.31502
	Solyc01g090965	up	9.55476	0.909978	143.201	5.31313e-33	4.329e-30	-3.13782	-4.16498	-4.16498	2.33785	2.22972	2.61554	-4.16498	-4.16498	-4.16498	-3.82259	2.39437	-4.16498
	Solyc01g091320	up	2.11841	6.42112	21.4634	3.60642e-06	0.000179666	6.62797	6.58949	4.71566	7.27504	7.24764	7.12359	5.57481	4.15714	5.22553	5.97771	7.21542	4.98583
	Solyc01g091360	up	1.15253	1.51318	9.1189	0.00252982	0.0434977	0.983859	1.80367	0.681651	2.38414	2.1291	1.49108	0.929862	1.02276	0.783028	1.15639	2.00144	0.911884
	Solyc01g091850	down	-1.20557	1.41435	12.1964	0.000478813	0.0118556	1.58827	1.68023	0.890399	0.81472	0.613928	0.54743	1.9975	2.05939	1.36964	1.3863	0.658693	1.80884
	Solyc01g094090	up	6.09895	-1.87877	21.4294	3.6709e-06	0.000181803	-4.16498	-4.16498	-4.16498	-0.599219	-0.654984	-1.83309	-4.16498	-4.16498	-4.16498	-4.16498	-1.0291	-4.16498
	Solyc01g094270	down	-2.22776	3.73877	18.4587	1.73625e-05	0.000711921	2.53217	2.10186	4.14042	2.15417	2.66063	2.46205	3.60478	4.88182	5.09151	2.92482	2.42562	4.52604
	Solyc01g095690	up	1.5611	1.10246	11.0991	0.000863705	0.0192207	1.74592	0.872365	0.489752	1.4869	1.79871	1.46192	0.736794	-0.761008	-0.121745	1.03601	1.58251	-0.0486532
	Solyc01g096250	up	1.22094	2.66673	25.9025	3.59113e-07	2.33174e-05	2.60259	3.14943	3.10366	2.94349	2.78711	3.0762	1.83813	1.77416	1.5627	2.95189	2.9356	1.725
	Solyc01g096370	up	1.54381	2.57817	23.8347	1.04973e-06	6.02591e-05	3.17391	2.95009	2.33629	2.55572	3.09341	3.15117	1.73849	1.50229	0.930349	2.8201	2.93344	1.39037
	Solyc01g096670	up	1.22804	4.12054	56.1629	6.67091e-14	1.08706e-11	3.81937	4.1542	4.06494	4.78852	4.67803	4.45106	3.52479	3.38083	3.35483	4.01284	4.6392	3.42015
	Solyc01g096730	up	1.00517	0.985555	9.24054	0.00236715	0.0417524	1.50248	1.36456	1.20362	1.06254	1.07708	1.09507	-0.266595	0.419555	0.0599202	1.35689	1.07823	0.0709601
	Solyc01g097280	up	2.30156	1.89421	11.274	0.000786022	0.0178217	1.86529	1.42733	3.13681	0.137044	2.56115	2.90266	-0.754739	0.29948	0.295614	2.14314	1.86695	-0.0532148
	Solyc01g097860	up	1.63928	6.04903	123.066	1.34875e-28	7.5704e-26	5.50188	5.43956	5.66925	6.85299	6.92551	6.75045	5.43053	5.06789	5.09412	5.5369	6.84298	5.19751
	Solyc01g098140	up	3.09657	-1.43043	9.05949	0.00261335	0.0446	-0.5306	-0.960753	-0.848986	-2.18067	-1.90826	-1.56964	-4.16498	-4.16498	-3.09034	-0.780113	-1.88619	-3.80677
	Solyc01g098690	up	2.31698	0.777709	21.453	3.62607e-06	0.00018029	1.53165	0.779176	-0.226287	1.24082	1.39858	1.46622	-1.07905	-0.761662	-0.711361	0.694845	1.36854	-0.85069
	Solyc01g098720	up	1.41957	1.48338	11.4683	0.000707933	0.0162824	2.70856	2.47307	1.4075	1.27397	1.14737	1.33904	-0.374032	0.0982578	-0.121745	2.19638	1.25346	-0.132506
	Solyc01g099190	down	-1.10702	7.51972	10.222	0.00138777	0.0279524	7.10291	6.43863	7.97121	6.66894	7.45011	6.58904	7.89893	8.0289	8.24421	7.17092	6.9027	8.05735
	Solyc01g099920	down	-1.49295	8.11071	44.8555	2.12122e-11	2.73357e-09	7.73348	6.93895	7.95971	7.39094	7.50029	7.22901	8.91264	8.86415	8.83329	7.54405	7.37341	8.87003
	Solyc01g100510	up	3.15006	3.37919	213.727	2.11257e-48	4.10456e-45	3.78344	3.9178	4.0563	3.79714	3.78679	3.88634	0.513837	0.904261	0.67573	3.91918	3.82342	0.697943
	Solyc01g100630	up	2.20337	-1.69375	8.96885	0.00274621	0.0462653	-3.13782	-2.55421	-1.9685	-1.37557	-1.06769	-1.15408	-2.51409	-3.19557	-3.09034	-2.55351	-1.19912	-2.93333
	Solyc01g100890	up	1.46911	0.674843	11.1292	0.000849798	0.0190117	1.27991	0.627032	0.489752	0.721654	0.662741	1.54767	-0.61637	-0.315729	-0.221944	0.798896	0.977354	-0.384681
	Solyc01g100910	up	2.59905	0.217122	10.152	0.00144141	0.0287349	0.471606	0.395461	1.172	-1.01367	-0.654984	1.57515	-1.49806	-1.63137	-3.09034	0.679688	-0.0311671	-2.07326
	Solyc01g102710	up	2.4605	1.36919	37.8466	7.65311e-10	7.73209e-08	0.471606	0.331256	1.29455	2.52851	2.45429	1.778	-0.073102	-0.315729	0.0599202	0.699137	2.2536	-0.109637
	Solyc01g102960	up	1.13441	6.26971	10.2094	0.0013973	0.0280771	6.02881	6.06335	7.05567	6.21242	6.88871	6.66764	4.83535	5.23064	6.08903	6.38261	6.58959	5.38501
	Solyc01g103660	down	-1.01585	2.74196	20.0184	7.66991e-06	0.000346559	2.78322	2.80621	2.47235	2.36887	2.18029	1.89167	3.35012	2.95352	3.17936	2.68726	2.14694	3.161
	Solyc01g103920	up	1.6559	6.86616	43.186	4.97767e-11	6.19339e-09	6.23179	6.09863	7.16938	7.63755	7.63883	7.48862	5.8077	5.9115	6.07326	6.49993	7.58833	5.93082
	Solyc01g104850	down	-1.17381	4.97927	14.4068	0.00014727	0.00450878	4.53977	4.3738	4.20757	4.777	4.74756	3.77223	6.16516	5.61087	5.02204	4.37371	4.43226	5.59936
	Solyc01g105030	up	1.29392	9.20727	34.8117	3.6318e-09	3.12013e-07	9.08548	9.24877	8.96881	10.0805	9.72196	9.40336	8.86082	8.17376	8.26967	9.10102	9.73526	8.43475
	Solyc01g105050	up	2.08165	8.91317	74.9342	4.86675e-18	1.21707e-15	8.59559	8.87679	8.38834	10.0841	9.63731	9.3729	8.04038	7.43824	7.36309	8.62024	9.6981	7.6139
	Solyc01g105070	up	1.67523	0.567135	16.2523	5.54432e-05	0.0019696	0.530588	1.12048	0.58889	0.943946	0.563405	1.23949	-0.9078	-0.414965	-0.711361	0.746653	0.915614	-0.678042
	Solyc01g105300	up	2.87632	1.70009	36.6038	1.44751e-09	1.3295e-07	2.54654	2.23064	1.172	2.27373	1.61248	2.58882	-0.266595	-0.521534	-1.03679	1.98306	2.15834	-0.608306
	Solyc01g105310	up	4.02479	-0.597818	22.2801	2.35637e-06	0.000124513	-1.31137	-0.544656	-0.724712	-1.01367	0.00540131	0.891485	-3.11525	-4.16498	-2.48133	-0.860245	-0.038928	-3.25385
	Solyc01g105320	up	2.06835	1.14598	20.9632	4.68192e-06	0.000225679	0.793975	1.04242	1.84867	1.17213	1.42712	2.18716	-0.166607	-0.414965	-0.445998	1.22836	1.59547	-0.342523
	Solyc01g105410	up	1.00136	5.40166	18.5204	1.68094e-05	0.000692612	6.18327	5.35126	6.11786	5.24454	5.70003	5.36905	4.30757	4.70404	4.30212	5.88413	5.43788	4.43791
	Solyc01g105680	up	4.27314	1.01274	37.467	9.29744e-10	9.10213e-08	2.24575	1.96046	1.23457	0.81472	0.0791806	1.75415	-2.09102	-3.19557	-3.09034	1.81359	0.882684	-2.79231
	Solyc01g105920	up	2.71834	-0.517808	20.7535	5.22364e-06	0.000248005	-0.207789	-0.428935	-0.724712	0.0630985	-0.334456	0.168775	-4.16498	-2.21111	-1.72541	-0.453812	-0.034194	-2.7005
	Solyc01g106400	up	1.37044	1.60093	22.3342	2.29094e-06	0.000121564	1.61577	1.12048	1.03806	2.24057	2.29311	2.11409	0.629618	1.0602	0.882894	1.2581	2.21592	0.857569
	Solyc01g106480	up	1.21826	7.38487	37.0558	1.14799e-09	1.09833e-07	7.29609	7.42813	7.60273	8.02351	7.94581	7.47909	6.95802	6.34686	6.47396	7.44232	7.81614	6.59295
	Solyc01g106620	up	5.81906	2.64181	18.5933	1.6179e-05	0.000671015	2.17357	-1.54784	4.83406	0.515312	3.78127	2.54779	-2.51409	-2.62095	-2.48133	1.81993	2.28146	-2.53879
	Solyc01g107280	up	2.74036	-0.845555	11.949	0.000546755	0.0131273	-0.414783	-0.960753	-0.848986	-1.01367	-1.23645	0.37049	-2.51409	-2.21111	-4.16498	-0.741507	-0.626545	-2.96339
	Solyc01g107460	up	1.39947	0.912581	17.9398	2.28002e-05	0.000906909	0.841338	0.730223	1.13966	1.17213	1.50949	1.37076	0.0147099	0.0982578	-0.121745	0.90374	1.35079	-0.00292574
	Solyc01g108710	up	5.03892	3.29765	101.778	6.20968e-24	2.57122e-21	4.19702	3.7147	3.84693	2.60867	3.80864	4.35523	-1.76429	-0.636608	-1.23194	3.91955	3.59084	-1.21095
	Solyc01g108860	up	2.05511	1.20315	30.5422	3.26678e-08	2.45573e-06	1.34708	1.04242	0.489752	2.11811	1.7086	1.89167	0.320628	-0.135651	-0.572587	0.95975	1.90613	-0.129204
	Solyc01g109550	up	2.0419	0.955265	24.8744	6.11911e-07	3.73325e-05	1.20945	0.515888	0.489752	1.94364	1.33976	1.57515	0.175762	-0.761662	-0.572587	0.738364	1.61952	-0.386162
	Solyc01g109700	up	1.18179	3.56934	30.8509	2.78636e-08	2.11345e-06	4.15077	4.0731	3.79624	3.85853	3.53478	3.80161	2.90935	2.38854	2.31877	4.0067	3.73164	2.53889
	Solyc01g110555	down	-1.35511	2.3835	10.6802	0.00108288	0.0230425	3.52521	3.13069	1.76635	1.45834	0.709956	1.09507	2.39118	2.52865	2.43848	2.80742	1.08779	2.45277
	Solyc01g110660	up	2.00535	1.62832	31.5007	1.99373e-08	1.54947e-06	1.20945	1.08198	1.38008	1.7686	2.53517	2.7781	0.736794	0.419555	0.142838	1.22384	2.36062	0.433062
	Solyc01g110710	up	5.42879	-1.97684	13.1865	0.000281973	0.00774139	-2.54391	-1.54784	-4.16498	-1.59746	-2.22602	-0.983986	-4.16498	-4.16498	-4.16498	-2.75224	-1.60249	-4.16498
	Solyc01g110730	up	2.15778	-0.623758	11.9701	0.000540605	0.0130292	-1.53502	-1.32453	-1.49247	-0.0986777	-0.550913	0.801031	-1.49806	-2.62095	-1.48208	-1.45068	0.05048	-1.86703
	Solyc01g110770	up	4.62102	-2.25983	9.20899	0.00240829	0.0423009	-1.6072	-3.14558	-3.2421	-2.59635	-2.63368	-1.56964	-4.16498	-4.16498	-4.16498	-2.66496	-2.26656	-4.16498
	Solyc01g150101	up	2.55596	-0.210681	9.13766	0.00250401	0.0432602	-0.947111	-0.0412223	-0.066854	-1.01367	-0.241697	1.40179	-1.2734	-1.63137	-4.16498	-0.351729	0.0488083	-2.35658
	Solyc02g021430	up	1.0519	3.54718	36.1835	1.7958e-09	1.60845e-07	3.47353	3.56686	3.36374	3.95879	3.97732	4.07143	3.15135	2.98305	2.69355	3.46804	4.00251	2.94265
	Solyc02g021680	up	3.35417	2.35693	40.1429	2.36044e-10	2.64978e-08	3.1269	2.7921	3.25473	1.4869	2.19695	3.44732	-1.07905	-0.898593	-0.121745	3.05791	2.37706	-0.699795
	Solyc02g022900	up	1.56812	0.198389	9.8099	0.00173575	0.0329635	0.641776	-0.808326	0.143454	0.33854	0.613928	1.01705	-0.9078	-0.414965	-1.23194	-0.00769866	0.656505	-0.851568
	Solyc02g031750	up	2.63105	-0.850302	9.90869	0.001645	0.0315965	-0.307577	-0.960753	-0.724712	-1.1833	0.341514	-1.56964	-2.51409	-2.21111	-4.16498	-0.664347	-0.803809	-2.96339
	Solyc02g031780	up	1.57916	-0.0500414	10.8307	0.000998312	0.0216255	-0.656533	-0.32181	-0.848986	0.984572	-0.154543	0.753944	-0.9078	-1.0499	-0.711361	-0.60911	0.527991	-0.889686
	Solyc02g032100	up	1.16168	3.23298	10.487	0.00120218	0.0249291	3.28085	3.78628	3.31389	2.59561	3.61759	4.052	2.54656	1.84021	2.65169	3.46034	3.42173	2.34615
	Solyc02g037550	up	2.2557	1.72313	14.4897	0.000140925	0.0043621	2.57483	2.23064	-0.226287	2.20901	2.46809	2.13271	0.0974822	-0.414965	0.43375	1.5264	2.26994	0.0387558
	Solyc02g061990	up	2.02025	1.53089	9.7887	0.00175587	0.0332707	2.39606	2.15847	1.67904	0.569729	0.400267	2.84737	-0.374032	-0.636608	0.221247	2.07786	1.27246	-0.263131
	Solyc02g062340	up	1.40071	8.21181	69.5736	7.36168e-17	1.72168e-14	8.22162	8.31008	8.60508	8.78719	8.70111	8.44149	7.43838	6.99116	7.28637	8.37893	8.64326	7.23864
	Solyc02g063260	down	-1.05595	3.32265	16.3592	5.24003e-05	0.00187468	2.96527	2.85053	2.21738	3.26539	2.38325	2.99713	3.89823	3.97796	4.05157	2.67773	2.88192	3.97592
	Solyc02g063523	up	1.31968	5.94717	75.725	3.26058e-18	8.49028e-16	5.696	5.42337	5.70383	6.53642	6.68277	6.57748	5.51028	5.12968	5.17548	5.60773	6.59889	5.27181
	Solyc02g063527	up	1.38776	4.65002	36.1163	1.8589e-09	1.65908e-07	3.95046	4.03892	3.8037	5.04462	5.21097	5.90173	3.96013	3.84644	4.30602	3.93102	5.38578	4.03753
	Solyc02g065060	down	-1.24195	3.66309	24.1625	8.85383e-07	5.15277e-05	3.33976	3.70628	3.1531	3.43622	2.54822	2.93484	4.49864	4.05878	4.17295	3.39971	2.97309	4.24346
	Solyc02g065220	up	1.21171	1.14565	14.4521	0.000143773	0.00442778	0.841338	0.515888	0.326968	1.69706	2.05789	1.54767	0.36327	0.729407	0.67573	0.561398	1.76754	0.589469
	Solyc02g065400	up	1.17828	9.71645	38.6429	5.08872e-10	5.31119e-08	9.72194	9.88335	9.68856	10.4709	10.1385	9.79978	9.25478	8.82544	8.82842	9.76462	10.1364	8.96955
	Solyc02g065490	up	1.72357	0.952625	12.9454	0.000320711	0.00855387	0.587253	-0.0412223	0.725887	2.30615	1.30942	1.16909	0.629618	-0.521534	-0.329626	0.423973	1.59489	-0.0738473
	Solyc02g067050	up	2.59348	1.85228	57.8114	2.88489e-14	4.89036e-12	0.974755	0.826522	1.63332	2.59561	3.17139	2.64177	0.250012	0.235475	0.366335	1.14487	2.80292	0.283941
	Solyc02g068415	up	2.48529	0.052946	15.7045	7.40488e-05	0.00253775	0.694314	0.57253	0.489752	-0.72459	-0.154543	1.01705	-1.76429	-2.21111	-2.05442	0.585532	0.0459716	-2.00994
	Solyc02g068760	up	1.40239	2.09677	12.4544	0.000417	0.0106068	2.24575	2.33255	1.74501	2.75675	2.6364	2.30676	1.97578	0.729407	0.366335	2.10777	2.56663	1.02384
	Solyc02g069055	up	5.60074	-1.63558	12.8697	0.000333939	0.00884708	-0.94245	-3.14558	-1.30277	-0.72459	-3.20539	-1.15084	-4.16498	-4.16498	-4.16498	-1.79694	-1.6936	-4.16498
	Solyc02g069060	up	3.03376	-0.464819	12.4193	0.000424927	0.0107435	0.585641	-0.670476	-0.504298	-0.0148423	-1.90826	0.54743	-2.51409	-3.19557	-2.48133	-0.196378	-0.458557	-2.73033
	Solyc02g069450	up	2.75288	6.65399	94.298	2.71425e-22	1.00818e-19	6.35774	6.52817	6.12537	7.98515	7.47013	7.18239	5.33356	4.35247	4.63492	6.33709	7.54589	4.77365
	Solyc02g069460	up	1.94723	9.00461	66.9827	2.73895e-16	6.23248e-14	8.7774	8.94274	8.57893	10.1622	9.74498	9.28421	8.17123	7.63866	7.59915	8.76636	9.73045	7.80301
	Solyc02g069490	up	3.11594	6.79057	36.8651	1.26592e-09	1.19154e-07	6.87853	6.57188	5.06262	7.9174	7.82861	7.66364	5.18062	3.24926	4.99438	6.17101	7.80322	4.47475
	Solyc02g069510	up	1.86227	1.74273	21.554	3.44012e-06	0.00017172	2.05804	2.29938	1.07273	2.17094	2.03952	2.51977	0.883963	0.360767	-0.121745	1.81005	2.24341	0.374328
	Solyc02g070430	up	4.09509	-1.43114	9.39171	0.00217969	0.0392966	-1.53502	-2.55421	-0.848986	-1.59746	-3.20539	0.0947421	-3.11525	-4.16498	-4.16498	-1.64607	-1.56937	-3.81507
	Solyc02g070530	up	1.62483	1.80492	13.2128	0.000278043	0.00764181	2.70856	2.2825	1.6099	1.54238	1.63711	2.66754	-0.166607	0.523287	0.833825	2.20032	1.94901	0.396835
	Solyc02g070620	up	1.96551	0.0456857	15.0297	0.000105833	0.00344031	0.841338	0.67955	0.326968	-0.0972355	-0.154543	0.431913	-1.2734	-1.89231	-2.05442	0.615952	0.0600449	-1.74004
	Solyc02g070940	up	2.24465	9.97421	82.8294	8.94476e-20	2.59686e-17	9.72593	9.78016	9.35192	11.1429	10.7399	10.5873	9.06942	8.33969	8.23611	9.61934	10.8233	8.5484
	Solyc02g070950	up	5.3975	7.03135	301.894	1.27392e-67	5.36276e-64	5.4143	5.14262	4.74287	8.69861	8.36524	8.23629	3.59059	2.8611	2.50268	5.09993	8.43338	2.98479
	Solyc02g070970	up	6.23707	7.56977	267.041	5.0098e-60	1.58172e-56	5.37462	4.88191	4.98738	9.23856	8.99549	8.87879	3.55439	2.38829	2.06605	5.0813	9.03761	2.66958
	Solyc02g070980	up	5.67106	6.50842	523.267	8.23642e-116	1.04018e-111	4.72266	4.14044	4.6571	8.0893	7.94903	7.74976	2.65985	2.16624	1.90909	4.50674	7.92937	2.24506
	Solyc02g070990	up	8.4608	7.20358	1326.95	1.57057e-290	3.96694e-286	1.47271	1.23018	0.768934	8.89984	8.80495	8.6078	0.452265	0.419555	0.221247	1.15727	8.77086	0.364356
	Solyc02g071000	up	5.73042	6.4213	225.826	4.84823e-51	1.11324e-47	4.14606	3.70628	4.13775	8.05339	7.81671	7.76528	2.93208	1.81852	1.22491	3.9967	7.87846	1.99184
	Solyc02g071010	up	3.72413	9.41155	126.491	2.40038e-29	1.44354e-26	8.65669	8.42962	8.30426	10.9612	10.5709	10.2201	7.52792	6.5602	6.2751	8.46352	10.5841	6.78774
	Solyc02g071020	up	2.53043	6.49929	132.151	1.38666e-30	9.2169e-28	6.22926	5.66501	5.86024	7.67433	7.30198	7.44751	5.32084	4.6307	4.82238	5.91817	7.47461	4.92464
	Solyc02g071030	up	2.69927	10.4179	134.735	3.77335e-31	2.64742e-28	10.0012	9.71443	9.99935	11.6217	11.4554	11.1074	9.15761	8.49391	8.34777	9.90501	11.3948	8.66643
	Solyc02g071350	up	1.89885	1.54474	19.6366	9.36593e-06	0.000416487	1.77059	1.84986	2.10463	1.1	1.63711	2.57527	-0.166607	0.29948	-0.0280548	1.90836	1.7708	0.0349395
	Solyc02g071700	up	1.38543	4.75608	29.6643	5.13715e-08	3.77192e-06	4.6993	5.13088	4.13193	5.25471	5.4691	5.17429	4.28126	3.79713	3.60198	4.65404	5.29937	3.89346
	Solyc02g072170	down	-1.34995	1.2839	17.4877	2.8918e-05	0.0011146	0.587253	1.26497	1.07273	0.274451	0.456721	0.891485	1.93134	1.68112	2.02292	0.974981	0.540886	1.87846
	Solyc02g077040	up	1.82077	0.713887	12.2169	0.000473587	0.0117851	0.694314	1.70578	0.768807	0.569729	0.842983	1.37076	-1.2734	-0.0533951	-1.45768	1.0563	0.927824	-0.928157
	Solyc02g077590	up	2.04123	3.79991	23.8812	1.0247e-06	5.89562e-05	3.91655	3.81004	4.07352	3.21506	4.33069	5.08107	2.14099	1.86157	2.89835	3.93337	4.20894	2.3003
	Solyc02g078690	down	-2.71679	0.586787	22.8875	1.71767e-06	9.35021e-05	-0.0268016	-0.128825	-0.144369	-1.8598	-0.154543	-1.83309	1.45432	2.1138	0.783028	-0.0999987	-1.28247	1.45039
	Solyc02g079510	down	-1.00689	5.88985	33.4826	7.19052e-09	5.95469e-07	5.16721	5.4146	5.29135	5.50395	5.58298	5.48589	6.14641	6.81623	6.55229	5.29105	5.52427	6.50498
	Solyc02g079870	up	1.52778	1.52288	21.9551	2.79104e-06	0.000142416	0.745005	1.08198	1.03806	2.18935	2.59926	1.89167	0.387947	1.0602	0.730376	0.955013	2.22676	0.726173
	Solyc02g079950	up	1.14564	9.46715	27.5352	1.54264e-07	1.05024e-05	9.45275	9.68072	9.16207	10.2841	9.88926	9.54892	9.08699	8.60785	8.63259	9.43185	9.90741	8.77581
	Solyc02g080310	up	1.185	2.38946	20.5213	5.89722e-06	0.000275837	3.04832	2.89183	2.36456	2.68464	2.48177	2.54295	1.45432	1.47483	1.26266	2.76824	2.56979	1.39727
	Solyc02g080540	up	1.01183	7.605	18.1989	1.9899e-05	0.000805464	7.51693	7.60619	7.74703	8.28377	8.0416	7.63944	7.48771	6.66347	6.69135	7.62338	7.98827	6.94751
	Solyc02g080640	up	1.04026	6.92076	23.9271	1.00054e-06	5.76978e-05	6.91945	7.3865	7.02328	7.29541	6.91463	7.44256	6.5048	5.80528	6.18996	7.10974	7.21753	6.16668
	Solyc02g081060	up	3.32033	-1.94381	10.1938	0.00140914	0.0282252	-2.54391	-1.54784	-2.68379	-1.59746	-1.90826	-1.56964	-4.16498	-3.19557	-4.16498	-2.25851	-1.69179	-3.84184
	Solyc02g081120	up	4.17296	4.38551	49.5587	1.92521e-12	2.67181e-10	5.19483	5.13323	4.72931	3.41408	3.98214	5.85728	0.629618	0.0982578	1.1467	5.01912	4.41784	0.624859
	Solyc02g081330	up	1.82962	5.21028	175.744	4.11914e-40	5.47586e-37	5.14615	4.93688	4.96901	5.94851	5.89419	5.95997	4.24077	4.13969	3.92258	5.01735	5.93422	4.10101
	Solyc02g081340	up	3.73986	-2.01409	11.1427	0.000843649	0.0189076	-2.54391	-4.16498	-4.16498	-2.18067	-1.06769	-0.983986	-3.11525	-4.16498	-4.16498	-3.62462	-1.41078	-3.81507
	Solyc02g081370	up	3.47461	-0.497684	19.7057	9.03303e-06	0.000403817	-0.962483	-4.16498	-1.73688	-0.149469	0.649868	0.959392	-2.61118	-2.92828	-2.05923	-2.28812	0.486597	-2.5329
	Solyc02g081850	up	1.53433	4.04257	63.049	2.01633e-15	3.97878e-13	3.75281	3.62157	4.0563	4.80562	4.82471	4.44735	3.39171	2.97328	3.1294	3.81023	4.69256	3.1648
	Solyc02g082720	up	2.74866	2.93988	69.533	7.51457e-17	1.74131e-14	2.19196	1.42733	1.172	3.98906	4.0201	4.25257	1.9086	1.0602	0.930349	1.5971	4.08724	1.29971
	Solyc02g082760	up	1.39837	7.14204	61.1423	5.30954e-15	9.82633e-13	6.93098	7.037	7.39549	7.76291	7.77388	7.48545	6.55211	6.14609	6.10557	7.12116	7.67408	6.26792
	Solyc02g082850	up	1.73344	3.14231	14.6335	0.000130573	0.00411738	3.43546	3.42024	4.30019	2.81423	2.68447	3.93488	1.97578	0.476042	1.78551	3.71863	3.14453	1.41244
	Solyc02g082920	up	3.1225	2.28825	72.0824	2.064e-17	4.91817e-15	0.931639	0.119478	0.437505	3.08076	3.27706	4.06174	0.513837	0.235475	0.618933	0.496207	3.47319	0.456082
	Solyc02g082930	up	2.45496	5.02338	22.2155	2.43695e-06	0.000127702	5.14143	4.57338	6.43721	4.09983	5.61279	5.84046	2.53176	2.73946	3.34611	5.38401	5.18436	2.87244
	Solyc02g083490	up	3.70149	1.65203	36.7914	1.31468e-09	1.22985e-07	1.86529	2.6934	2.27806	1.67241	0.662741	2.78988	-1.76429	-1.21895	-1.72541	2.27892	1.70834	-1.56955
	Solyc02g083930	down	-1.24714	2.53905	27.7575	1.37515e-07	9.51606e-06	2.15495	2.57363	2.08778	1.90183	2.07602	1.6546	3.11661	2.97328	3.27437	2.27212	1.87749	3.12142
	Solyc02g084670	up	4.61544	-0.107297	21.7205	3.15397e-06	0.000158744	0.931639	1.26497	0.268353	-1.59746	-0.779879	0.239194	-4.16498	-4.16498	-3.09034	0.821652	-0.712716	-3.80677
	Solyc02g084680	up	1.03444	2.82918	13.944	0.000188338	0.00553144	2.96357	3.34094	3.11202	2.51989	2.9135	3.51274	2.08123	2.00283	1.95571	3.13884	2.98205	2.01326
	Solyc02g084800	up	1.53575	0.391454	11.4339	0.000721157	0.0164991	0.278646	1.00175	0.850996	0.458761	0.341514	0.934565	-0.9078	-0.414965	-1.45768	0.710464	0.57828	-0.926815
	Solyc02g085145	up	6.01183	-0.967165	16.7098	4.3556e-05	0.00160839	-1.79983	-0.0412223	0.143454	-1.1833	-2.63415	-0.153308	-4.16498	-4.16498	-4.16498	-0.565866	-1.32359	-4.16498
	Solyc02g085400	up	4.09061	-0.22499	18.9905	1.3137e-05	0.000558608	1.31553	0.515888	-0.848986	-0.72459	0.00540131	-0.246469	-4.16498	-2.62095	-4.16498	0.327476	-0.321886	-3.6503
	Solyc02g085760	up	2.57392	5.95992	181.11	2.77328e-41	3.89153e-38	5.86608	5.69049	5.93206	6.86732	6.85812	6.64017	4.52879	4.25749	3.77933	5.82954	6.78854	4.18854
	Solyc02g085770	up	3.09882	-0.0102871	38.2919	6.09154e-10	6.25448e-08	-1.11777	-1.32453	-1.49247	0.859094	1.0796	1.2378	-1.07905	-1.89231	-3.09034	-1.31159	1.05883	-2.02057
	Solyc02g085950	up	3.9132	10.1148	209.744	1.56176e-47	2.62979e-44	9.02317	9.60376	9.10265	11.6212	11.1617	11.0922	7.80764	6.95922	7.3016	9.24319	11.2917	7.35615
	Solyc02g086180	up	1.49064	6.75434	13.1588	0.000286172	0.00783113	6.97052	6.91108	5.40119	7.58886	7.21844	7.34257	6.33683	4.92303	6.09205	6.4276	7.38329	5.78397
	Solyc02g086480	up	7.0823	1.67811	45.4051	1.60215e-11	2.09674e-09	2.34768	2.89563	2.23279	0.333139	0.613928	2.99713	-4.16498	-3.19557	-4.16498	2.49203	1.31473	-3.84184
	Solyc02g086650	up	4.25455	3.70092	81.5448	1.71337e-19	4.80848e-17	2.78322	3.34094	1.38008	5.30994	4.69866	4.70853	0.250012	0.633332	1.1467	2.50142	4.90571	0.676682
	Solyc02g086820	up	3.99143	0.31475	49.1865	2.32743e-12	3.1949e-10	-1.53502	-0.960753	-1.49247	1.9641	1.07708	1.43217	-3.11525	-1.41047	-2.48133	-1.32942	1.49112	-2.33568
	Solyc02g086910	up	1.39986	4.74931	58.6906	1.84522e-14	3.17051e-12	4.6668	4.62687	4.62221	5.61498	5.26293	5.06177	4.20884	3.73921	3.81291	4.63863	5.31323	3.92032
	Solyc02g086970	up	1.68698	5.81257	84.3486	4.14799e-20	1.24726e-17	4.96557	5.12616	4.87904	6.80408	6.30827	6.92494	5.13723	5.07705	4.81637	4.99026	6.6791	5.01022
	Solyc02g086980	up	2.18425	2.58567	52.6071	4.07406e-13	6.16184e-11	1.64276	2.31606	1.38008	3.80283	3.19647	3.56165	1.35688	1.52923	1.22491	1.77963	3.52032	1.37034
	Solyc02g087400	up	1.18233	5.58554	59.452	1.25312e-14	2.24478e-12	5.62712	5.51145	5.39605	6.21816	6.17095	5.85308	5.0722	4.87132	4.76561	5.51154	6.08073	4.90304
	Solyc02g087970	down	-1.02112	8.10254	41.1206	1.43123e-10	1.65069e-08	8.00622	8.08789	7.57263	7.64703	7.54131	7.58682	8.69527	8.41085	8.7144	7.88891	7.59172	8.60684
	Solyc02g089210	up	1.89789	1.80189	38.7435	4.83306e-10	5.12914e-08	2.15495	2.34886	2.13776	1.83675	2.07602	2.4323	0.0147099	0.419555	0.366335	2.21385	2.11503	0.266867
	Solyc02g089540	up	1.67475	1.23799	21.1637	4.21687e-06	0.000206015	0.887195	1.04242	1.46433	1.39946	1.90398	2.05675	-0.374032	0.476042	0.295614	1.13132	1.78673	0.132541
	Solyc02g090030	up	1.04423	9.25921	42.4811	7.13703e-11	8.54347e-09	9.1566	9.18141	9.15635	9.9911	9.68154	9.48189	8.90788	8.53523	8.59693	9.16479	9.71818	8.68001
	Solyc02g090300	up	2.20253	-0.427661	10.131	0.00145795	0.028996	0.793975	0.331256	-0.313138	-0.72459	-0.779879	-0.568604	-2.09102	-4.16498	-2.05442	0.270698	-0.691024	-2.77014
	Solyc02g090450	up	3.87462	-0.164939	9.0816	0.00258194	0.0441236	1.79486	1.26497	-2.28226	-0.861902	-1.06769	-1.83309	-3.11525	-4.16498	-4.16498	0.259186	-1.25423	-3.81507
	Solyc02g090890	up	1.12697	7.00448	54.6161	1.46534e-13	2.3425e-11	6.75398	6.67629	7.0645	7.58731	7.65462	7.34286	6.48743	6.45798	6.26823	6.83159	7.52826	6.40455
	Solyc02g091080	up	2.42451	1.7906	49.6633	1.82526e-12	2.56125e-10	1.24511	0.57253	1.65636	2.54218	2.6726	2.90266	0.387947	0.0244231	0.559808	1.158	2.70581	0.324059
	Solyc02g091140	up	1.21067	2.88431	14.7778	0.000120949	0.00387189	2.91081	2.62809	3.52264	3.32988	2.85169	3.46211	1.86201	1.65689	2.47094	3.02051	3.21456	1.99661
	Solyc02g092050	up	1.48196	1.95168	11.6355	0.000647046	0.0151325	2.42744	1.85023	2.26313	2.41419	1.33976	2.83605	0.0974822	0.904261	1.3348	2.18027	2.19667	0.778847
	Solyc02g092450	up	1.42823	1.69668	10.2667	0.00135455	0.0274365	1.01584	1.82714	2.10463	2.25725	1.14737	2.71773	0.836555	0.944853	0.498155	1.6492	2.04078	0.759854
	Solyc02g093330	up	1.37832	2.17739	18.9957	1.31014e-05	0.000558038	2.42744	1.93907	2.64355	2.29003	2.26176	3.00725	1.35688	1.13227	1.10595	2.33669	2.51968	1.19837
	Solyc02g093590	up	1.06358	3.12869	21.3922	3.74294e-06	0.000184647	3.58208	3.28272	2.89672	3.44282	3.2613	3.66118	2.5168	2.32843	2.3713	3.25384	3.4551	2.40551
	Solyc02g093890	up	2.4387	0.75641	20.6128	5.62181e-06	0.000264917	1.0573	-0.222093	1.03806	1.1	1.18127	1.84727	-0.9078	-0.315729	-2.05442	0.624422	1.37618	-1.09265
	Solyc02g094180	up	1.90676	-0.561165	9.97057	0.00159062	0.0306921	-0.656533	-0.808326	-0.6103	-0.377078	0.563405	-0.831845	-2.09102	-1.41047	-2.05442	-0.691719	-0.215172	-1.85197
	Solyc02g094860	up	1.16501	4.34453	13.5868	0.000227784	0.00646445	5.16703	5.00791	4.45833	4.21919	3.6959	5.0071	3.47921	2.96517	3.25586	4.87776	4.30739	3.23341
	Solyc03g005020	up	1.2611	1.65913	12.1293	0.000496349	0.0121953	1.24511	2.31606	1.6575	1.79168	2.05789	2.18716	0.629618	1.16699	0.43375	1.73956	2.01224	0.743454
	Solyc03g005280	up	6.35085	-0.842071	18.8115	1.44297e-05	0.000607441	0.887195	-1.32453	-1.9685	-0.72459	-0.433591	-0.983986	-4.16498	-4.16498	-4.16498	-0.801948	-0.714056	-4.16498
	Solyc03g005420	up	1.71002	0.918048	13.1468	0.000288017	0.00787262	0.887195	1.34515	1.23457	1.30638	1.11265	1.43217	0.513837	-1.63137	-0.711361	1.15564	1.28373	-0.609631
	Solyc03g005510	up	5.18985	-0.384819	24.4882	7.4766e-07	4.44338e-05	0.793975	-0.670476	-0.405554	-1.37557	0.216302	0.54743	-4.16498	-3.19557	-4.16498	-0.0940183	-0.203947	-3.84184
	Solyc03g005760	up	1.81489	11.3245	43.1937	4.95802e-11	6.19339e-09	11.085	11.2396	10.7912	12.46	12.0521	11.615	10.7777	9.91769	9.93249	11.0386	12.0424	10.2093
	Solyc03g005770	up	3.97978	9.0185	125.17	4.67193e-29	2.6819e-26	7.84424	7.92594	7.4531	10.6677	10.2111	9.91709	6.96994	6.05176	5.5835	7.74109	10.2653	6.20173
	Solyc03g005780	up	5.30807	8.26757	134.298	4.70247e-31	3.21014e-28	6.66114	6.71689	5.69339	10.0477	9.55974	9.32052	5.12806	3.78405	3.73487	6.35714	9.64266	4.21566
	Solyc03g005900	down	-1.03206	1.75353	14.4987	0.000140257	0.00434678	0.471606	1.08198	0.437505	1.54238	1.36947	1.49108	2.39118	2.35879	2.69414	0.663697	1.46764	2.48137
	Solyc03g006030	up	1.04153	2.6311	12.8685	0.000334156	0.00884708	2.34753	2.53481	3.27176	3.01222	3.08246	2.73292	2.13578	1.67773	1.91241	2.71804	2.94254	1.90864
	Solyc03g006080	up	2.03639	1.85077	35.9972	1.97598e-09	1.75121e-07	1.81872	2.48788	2.12129	2.52851	1.92414	2.35513	0.452265	0.5304	-0.221944	2.14263	2.26926	0.253573
	Solyc03g006540	up	2.74379	1.7345	66.2137	4.04584e-16	8.80947e-14	1.13538	1.26497	1.63332	2.75675	2.6364	2.50556	0.513837	-0.636608	-0.221944	1.34456	2.6329	-0.114905
	Solyc03g007200	up	1.50676	1.21338	11.0058	0.000908297	0.0200891	2.09759	2.12098	1.23457	1.62179	0.456721	1.27344	-0.166607	-0.761662	0.0599202	1.81771	1.11732	-0.289449
	Solyc03g007290	down	-2.36671	0.321263	17.5247	2.83602e-05	0.00110034	0.0558336	0.456931	-0.144369	-1.1833	-1.4276	-0.983986	-0.266595	1.58166	1.22491	0.122798	-1.1983	0.846656
	Solyc03g007940	down	-2.53764	1.3417	32.2036	1.38833e-08	1.1062e-06	1.01662	0.57253	1.78737	-0.184621	-0.492449	-0.346064	2.5168	1.50229	2.18821	1.12551	-0.341044	2.0691
	Solyc03g025190	up	6.10697	-0.40266	54.2036	1.80756e-13	2.83573e-11	-4.16498	-3.14558	-2.28226	0.768937	1.24677	0.601895	-4.16498	-4.16498	-3.09034	-3.19761	0.872533	-3.80677
	Solyc03g025710	up	1.15943	3.47724	36.3526	1.64662e-09	1.50146e-07	3.0885	3.01283	3.26975	4.22352	4.16694	3.80742	2.93208	3.07735	2.73423	3.1237	4.06596	2.91456
	Solyc03g025870	down	-1.19254	0.966308	10.4926	0.00119856	0.0248958	0.133991	-0.0412223	0.850996	0.137044	0.662741	0.490827	1.25238	1.88261	1.62171	0.314588	0.430204	1.58557
	Solyc03g026040	up	1.96127	0.656585	9.44227	0.00212041	0.0385027	0.931639	-0.222093	-0.6103	2.32209	0.511049	0.705021	-0.374032	-0.135651	-1.03679	0.033082	1.17939	-0.515491
	Solyc03g026050	up	1.61365	2.28065	15.0318	0.000105714	0.00344031	1.66925	1.87296	1.29455	3.78569	2.74239	2.30676	1.45432	1.90336	0.930349	1.61225	2.94495	1.42934
	Solyc03g031530	up	2.49648	-0.695296	13.5082	0.000237523	0.00669571	-0.114459	-0.544656	-0.6103	-0.599219	-0.0723553	-0.694228	-1.49806	-3.19557	-4.16498	-0.423138	-0.455268	-2.95287
	Solyc03g031570	up	4.759	-2.12574	11.107	0.000860038	0.0191615	-2.12442	-1.54784	-3.2421	-2.18067	-1.90826	-2.15563	-4.16498	-4.16498	-4.16498	-2.30479	-2.08152	-4.16498
	Solyc03g032170	up	3.13259	-1.35146	10.8728	0.000975877	0.0212489	-1.11777	-1.32453	-1.13515	-0.29339	-1.4276	-2.34295	-3.0748	-4.16498	-3.0858	-1.19248	-1.35465	-3.44186
	Solyc03g032240	up	1.24218	1.69071	10.8042	0.00101268	0.0218777	2.05804	1.82714	1.98232	1.3691	1.58741	2.62871	0.736794	0.633332	0.882894	1.95583	1.86174	0.751007
	Solyc03g034220	up	1.13554	11.772	48.76	2.8928e-12	3.9073e-10	11.6755	12.0591	11.6614	12.4349	12.1737	11.9895	11.1441	10.9663	11.11	11.7987	12.1994	11.0735
	Solyc03g043640	up	1.33751	0.862459	10.3443	0.00129876	0.0266001	1.34708	1.04242	1.20362	0.672769	0.799989	1.57515	-0.754739	0.235475	-0.329626	1.19771	1.01597	-0.282963
	Solyc03g044440	up	4.45179	-2.63524	9.13793	0.00250365	0.0432602	-4.16498	-4.16498	-4.16498	-2.59396	-2.22602	-2.15563	-4.16498	-4.16498	-4.16498	-4.16498	-2.3252	-4.16498
	Solyc03g044630	up	1.8961	-0.423451	11.1158	0.000855939	0.0191321	-1.11777	-1.81214	-0.144369	-0.0972355	0.286322	0.37049	-1.76429	-1.21895	-1.72541	-1.02476	0.186525	-1.56955
	Solyc03g044710	up	4.61743	-2.1279	10.0437	0.00152872	0.0299018	-2.12442	-2.55421	-1.71094	-3.17542	-2.22602	-1.56964	-4.16498	-4.16498	-4.16498	-2.12986	-2.32369	-4.16498
	Solyc03g044797	up	4.75701	-2.33628	11.2606	0.000791707	0.0179345	-3.13782	-2.55421	-3.2421	-2.59396	-1.64801	-2.15563	-4.16498	-4.16498	-4.16498	-2.97804	-2.13253	-4.16498
	Solyc03g045070	up	2.04387	3.19882	51.7514	6.2993e-13	9.35928e-11	3.27223	3.34907	3.01731	4.14952	3.88777	3.43986	2.32401	1.58166	1.40367	3.21287	3.82571	1.76978
	Solyc03g053110	up	1.52844	6.41473	84.8079	3.288e-20	1.01279e-17	6.40247	6.37835	6.11428	7.30091	6.91663	6.84676	5.63562	5.35257	5.52347	6.29837	7.02143	5.50389
	Solyc03g059270	up	2.63297	0.584893	23.3306	1.3641e-06	7.60583e-05	0.887195	1.65422	1.32363	0.207383	0.456721	1.01705	-2.51409	-1.0499	-2.48133	1.28835	0.560384	-2.0151
	Solyc03g062710	up	1.7838	4.0836	44.3396	2.76075e-11	3.50407e-09	4.05357	4.55294	3.91738	4.90686	4.6919	4.25257	3.27209	2.77367	2.42198	4.17463	4.61711	2.82258
	Solyc03g062720	up	1.78627	3.41373	39.4285	3.40295e-10	3.68892e-08	3.42772	3.57381	3.09977	4.47587	3.91824	3.60896	2.6734	2.00283	2.03645	3.3671	4.00102	2.23756
	Solyc03g063100	up	2.95056	1.41623	15.5819	7.90093e-05	0.00267509	2.73388	1.91737	-0.405554	1.62179	1.18127	2.46205	-1.2734	-0.315729	-1.72541	1.41523	1.75504	-1.10485
	Solyc03g063730	up	1.04405	2.25172	11.3895	0.000738611	0.0168678	1.66925	2.00229	2.56049	2.63443	3.00152	2.41719	1.35688	1.94398	1.65033	2.07734	2.68438	1.6504
	Solyc03g065200	up	4.75968	-2.33815	9.0097	0.0026855	0.0454014	-4.16498	-4.16498	-1.9685	-1.59746	-2.22602	-2.57171	-4.16498	-4.16498	-4.16498	-3.43282	-2.13173	-4.16498
	Solyc03g070465	up	4.45304	-2.58048	8.90689	0.00284097	0.0474585	-3.13782	-4.16498	-4.16498	-1.8598	-2.63415	-2.57171	-4.16498	-4.16498	-4.16498	-3.82259	-2.35522	-4.16498
	Solyc03g071590	up	1.09585	6.05145	61.1348	5.32983e-15	9.82633e-13	6.00254	6.01443	6.27796	6.58624	6.48887	6.31593	5.43947	5.30827	5.36919	6.09831	6.46368	5.37231
	Solyc03g078620	up	5.01283	-1.66305	12.9752	0.00031564	0.0084633	-0.947111	-0.808326	-1.9685	-1.37557	-1.90826	-2.57171	-4.16498	-4.16498	-4.16498	-1.24131	-1.95185	-4.16498
	Solyc03g079880	up	5.90769	0.936515	24.894	6.0571e-07	3.71336e-05	2.56075	1.57326	1.43441	-0.483877	-1.4276	1.93475	-3.11525	-4.16498	-4.16498	1.85614	0.00775567	-3.81507
	Solyc03g080100	down	-1.47575	6.74117	33.9223	5.73566e-09	4.813e-07	6.29501	6.35661	6.87206	5.35519	6.36486	5.85309	7.15497	7.55514	7.43488	6.50789	5.85772	7.38166
	Solyc03g080110	down	-1.36256	1.15535	12.5861	0.000388616	0.0100375	0.587253	0.515888	0.0767005	0.81472	-0.334456	0.934565	1.71246	2.20017	1.73295	0.39328	0.47161	1.88186
	Solyc03g082420	up	2.85974	3.92739	16.1327	5.9056e-05	0.00208039	2.57483	2.02276	5.27096	4.09953	5.15405	4.57536	1.81386	1.41829	2.16855	3.28952	4.60964	1.80024
	Solyc03g083440	up	1.13789	4.63596	24.3886	7.87341e-07	4.66823e-05	5.12477	4.53524	4.92326	4.48891	4.88762	5.34131	3.64662	3.90782	3.86879	4.86109	4.90594	3.80774
	Solyc03g093180	up	2.32263	0.148082	23.309	1.37954e-06	7.67497e-05	-0.307577	-0.128825	0.0767005	1.13652	0.511049	0.84708	-1.76429	-0.636608	-2.05442	-0.119901	0.831548	-1.48511
	Solyc03g093390	up	8.86258	2.22953	34.4215	4.438e-09	3.76157e-07	2.57483	4.25714	2.71112	2.30615	-2.22602	2.23964	-4.16498	-4.16498	-4.16498	3.18103	0.773254	-4.16498
	Solyc03g093400	up	1.33206	3.10591	34.6495	3.94741e-09	3.36837e-07	2.98649	3.14943	3.5475	3.36107	3.65719	3.54089	2.28922	2.34369	1.93259	3.22781	3.51972	2.1885
	Solyc03g093790	up	1.73491	0.398156	13.3848	0.000253673	0.00706424	1.20945	1.33212	0.437505	0.274451	0.280266	0.54743	-1.07905	-1.21895	-1.45768	0.993026	0.367382	-1.25189
	Solyc03g093890	up	4.61612	-2.52811	10.0189	0.00154946	0.0301512	-4.16498	-3.14558	-4.16498	-2.59396	-2.22602	-1.83309	-4.16498	-4.16498	-4.16498	-3.82518	-2.21769	-4.16498
	Solyc03g094020	up	2.48403	-0.178508	21.6441	3.2821e-06	0.000164483	-0.794518	-0.222093	-0.984982	0.399902	0.755675	0.601895	-1.07905	-3.19557	-1.45768	-0.667198	0.585824	-1.91077
	Solyc03g095500	up	3.58468	-0.26119	34.7288	3.78991e-09	3.24494e-07	-0.947111	-1.32453	-2.68379	0.984572	0.613928	0.84708	-2.51409	-3.19557	-1.72541	-1.65181	0.815193	-2.47836
	Solyc03g095650	up	5.55966	1.18125	79.5596	4.67906e-19	1.27079e-16	-2.12442	-1.32453	-0.066854	2.24057	2.42629	2.91346	-2.09102	-3.19557	-2.48133	-1.17194	2.52678	-2.58931
	Solyc03g095940	up	1.0079	3.70068	10.8029	0.00101342	0.0218777	3.49591	3.87903	4.42835	3.62151	3.66028	4.39047	2.59009	3.29708	2.8123	3.93443	3.89075	2.89983
	Solyc03g096460	up	1.14451	3.76475	17.8418	2.40056e-05	0.000950365	3.88299	3.92869	3.10369	4.62334	4.15417	3.88634	3.236	3.24926	2.8123	3.63846	4.22128	3.09919
	Solyc03g096545	up	6.90643	-0.466379	17.7009	2.5851e-05	0.00101232	-0.307577	-1.54784	0.928754	-3.17542	-0.654984	0.934565	-4.16498	-4.16498	-4.16498	-0.308886	-0.96528	-4.16498
	Solyc03g096760	up	3.82313	-1.22736	14.0404	0.000178921	0.0053167	-0.794518	-0.32181	-1.13515	-1.59746	-1.90826	-0.568604	-3.11525	-4.16498	-4.16498	-0.750491	-1.35811	-3.81507
	Solyc03g097320	up	2.00471	2.24699	42.3613	7.5876e-11	8.99753e-09	2.01737	1.89534	2.75448	2.94349	2.89319	2.76623	1.17826	0.729407	0.730376	2.2224	2.86764	0.879347
	Solyc03g097590	up	3.17949	-0.407861	11.2868	0.000780607	0.0177307	-1.11777	0.395461	-0.066854	-0.861902	-0.540045	0.84708	-4.16498	-4.16498	-1.45768	-0.263055	-0.184956	-3.26255
	Solyc03g097700	down	-1.74981	1.99344	21.9775	2.75868e-06	0.00014105	2.13608	1.08198	1.70137	0.622169	1.42712	0.801263	2.39118	2.50169	3.14968	1.63981	0.950184	2.68085
	Solyc03g097820	up	1.53171	0.601426	13.8038	0.000202922	0.00587777	1.41126	0.826522	1.10658	0.81472	0.563405	0.601895	-0.374032	-1.21895	-0.864919	1.11479	0.660007	-0.8193
	Solyc03g097940	up	1.16388	4.02671	34.1204	5.18045e-09	4.36159e-07	4.3563	4.00784	4.0526	4.24457	4.19209	4.75433	3.122	3.33575	3.31068	4.13892	4.397	3.25614
	Solyc03g098490	up	2.0733	-0.148515	11.9538	0.000545354	0.0131061	0.641776	-0.670476	0.0767005	0.207383	-0.540045	0.654379	-2.09102	-1.63137	-1.45768	0.0160003	0.107239	-1.72669
	Solyc03g098700	down	-1.11375	7.72815	10.5212	0.00118011	0.0245935	8.43936	8.0566	7.42309	6.64617	6.64259	7.27522	7.10494	8.13741	8.44612	7.97301	6.85466	7.89616
	Solyc03g098710	down	-1.76168	2.72536	15.844	6.87845e-05	0.00237669	3.07831	2.69363	2.32195	1.56934	2.03952	0.934565	2.25357	4.01656	3.19887	2.69796	1.51448	3.15633
	Solyc03g098780	up	2.92672	5.88213	40.2902	2.18905e-10	2.47941e-08	5.74832	5.21112	3.61962	6.57885	7.47875	6.6906	4.38788	3.79023	3.90487	4.85969	6.91607	4.02766
	Solyc03g111710	up	1.92907	3.0805	25.7605	3.86511e-07	2.4841e-05	3.37237	3.68074	2.35049	3.60857	3.44694	3.83616	1.73849	2.21684	0.930349	3.13453	3.63056	1.62856
	Solyc03g111800	up	2.42475	-0.847278	16.6796	4.42548e-05	0.00163181	-1.79983	-2.13598	-2.28226	-0.599219	0.341514	0.168775	-2.09102	-1.89231	-2.48133	-2.07269	-0.0296432	-2.15489
	Solyc03g112200	up	1.47358	5.82641	39.0949	4.03692e-10	4.33891e-08	6.46906	6.33091	5.70171	5.96559	5.91172	6.48784	4.80914	4.78172	4.39385	6.16723	6.12172	4.66157
	Solyc03g112410	up	3.42994	-1.61083	9.17457	0.00245401	0.0427322	-2.54391	-0.960753	-0.984982	-1.37557	-2.63415	-1.15408	-4.16498	-3.19557	-4.16498	-1.49655	-1.72127	-3.84184
	Solyc03g112430	up	5.80689	-1.40737	17.1533	3.44802e-05	0.00130725	-0.947111	-1.32453	-1.13515	-3.17542	-1.06769	-0.453047	-4.16498	-4.16498	-4.16498	-1.1356	-1.56539	-4.16498
	Solyc03g113210	up	5.06818	1.06603	53.1211	3.13607e-13	4.82993e-11	1.84219	2.06544	0.681651	0.984572	1.58741	1.82455	-4.16498	-1.89231	-4.16498	1.52976	1.46551	-3.40742
	Solyc03g113430	up	1.15442	3.1258	12.6981	0.000366021	0.00956044	2.41183	3.3652	2.8069	3.44352	4.18791	3.16932	2.40752	2.34369	2.7738	2.86131	3.60025	2.50834
	Solyc03g113910	up	2.91595	1.01736	16.654	4.48548e-05	0.00165152	1.34718	0.331256	0.931326	1.13652	1.27844	2.53385	-1.76429	0.0982578	-3.09034	0.869919	1.6496	-1.58546
	Solyc03g114350	up	1.63787	0.37405	9.43494	0.0021289	0.0386015	1.27991	0.826522	0.00670807	0.622169	0.511049	0.54743	-1.2734	-1.89231	-0.221944	0.704379	0.560216	-1.12922
	Solyc03g114600	up	2.65808	-0.396393	11.5978	0.000660298	0.0153713	-2.12442	0.119478	-1.49247	1.02408	-0.154543	-0.0657994	-2.51409	-1.41047	-2.48133	-1.1658	0.267914	-2.1353
	Solyc03g115900	up	2.13756	9.27405	109.97	9.94678e-26	5.02471e-23	8.83353	8.90847	8.75076	10.4458	10.0698	9.90042	8.39154	7.81905	7.76106	8.83092	10.1387	7.99055
	Solyc03g115980	up	2.27168	7.94951	107.061	4.31773e-25	2.05768e-22	7.44531	7.30849	7.5673	9.18577	8.83154	8.53765	6.98849	6.38855	6.34468	7.44037	8.85165	6.5739
	Solyc03g116730	up	1.1449	4.80832	27.9929	1.21758e-07	8.49551e-06	4.6993	4.65154	3.95773	5.58061	5.29476	5.32925	4.55829	4.05878	4.1248	4.43619	5.40154	4.24729
	Solyc03g117250	up	3.98229	1.42012	52.8902	3.52724e-13	5.36692e-11	2.65655	2.12098	1.26487	1.64732	1.7086	1.7299	-1.2734	-3.19557	-2.05442	2.01413	1.69527	-2.17446
	Solyc03g118050	up	1.8208	1.31538	31.8264	1.68587e-08	1.31832e-06	1.72081	1.75555	1.76635	1.4292	1.82039	1.49108	-0.374032	-0.222882	0.0599202	1.74757	1.58022	-0.178998
	Solyc03g118240	up	1.19571	6.40206	36.9079	1.23846e-09	1.17598e-07	6.44914	6.491	6.29032	7.17163	6.84582	6.52694	5.9853	5.5164	5.47229	6.41015	6.84813	5.658
	Solyc03g119200	up	1.26034	6.28429	76.1317	2.65359e-18	7.05519e-16	6.83494	6.55037	6.73057	6.53003	6.64247	6.33028	5.2434	5.35069	5.13919	6.7053	6.50093	5.24442
	Solyc03g119540	up	1.09075	5.20562	38.5582	5.3146e-10	5.50148e-08	5.16585	5.34314	5.19038	5.60362	5.72035	5.56341	4.88391	4.47723	4.17491	5.23312	5.62913	4.51202
	Solyc03g119860	up	1.8107	4.86348	87.344	9.11958e-21	3.03082e-18	4.75292	4.43951	4.52541	5.82668	5.55404	5.45108	4.16132	3.48883	3.70789	4.57261	5.6106	3.78602
	Solyc03g119910	up	5.3862	0.0590404	30.9489	2.64911e-08	2.02149e-06	0.587253	1.00175	0.681651	1.06254	-1.06769	-0.153308	-4.16498	-4.16498	-3.09034	0.756885	-0.0528188	-3.80677
	Solyc03g120640	up	1.55253	7.84125	88.7673	4.44106e-21	1.53661e-18	7.57443	7.66958	7.55392	8.79162	8.47164	8.25924	7.17725	6.89197	6.82212	7.59931	8.5075	6.96378
	Solyc03g120790	down	-1.02182	2.09978	9.31832	0.00226875	0.0405483	1.99661	2.51703	1.23457	1.39946	1.5619	1.6286	2.80238	2.31301	2.47094	1.91607	1.52999	2.52878
	Solyc03g120870	up	1.78249	0.88726	10.9437	0.000939229	0.0205929	2.21011	1.85023	0.890399	0.768937	-0.241697	1.05659	-0.9078	-1.21895	-1.03679	1.65025	0.527942	-1.05451
	Solyc03g120990	up	1.10827	4.97704	8.80077	0.00301104	0.0498381	4.52534	5.32471	4.62805	6.12847	5.19193	4.73618	4.28631	4.84207	3.7679	4.82603	5.3522	4.29876
	Solyc03g121060	up	1.49657	2.53607	16.9621	3.81344e-05	0.00142696	3.2014	2.74359	2.53585	2.06227	2.77606	3.46211	1.32288	1.58166	1.26247	2.82695	2.76681	1.389
	Solyc03g121140	up	3.70321	-0.113501	17.5391	2.81458e-05	0.0010937	-0.414783	-0.960753	-0.066854	-1.59746	0.755675	1.57515	-2.09102	-3.19557	-2.48133	-0.480797	0.244455	-2.58931
	Solyc03g122360	down	-2.43851	2.55518	62.6396	2.48212e-15	4.82637e-13	2.54654	2.00229	1.72335	0.768937	0.799989	1.49108	3.28097	3.6923	3.39767	2.09073	1.02	3.45698
	Solyc03g123390	up	1.26237	1.14896	14.7441	0.000123132	0.00392509	1.01662	0.959897	1.03806	1.88046	1.73166	1.23949	0.684201	0.419555	0.0599202	1.00486	1.6172	0.387892
	Solyc03g123410	up	5.20094	-0.507612	42.5507	6.88724e-11	8.28371e-09	-2.12442	-4.16498	-4.16498	1.02408	0.456721	0.801263	-4.16498	-2.62095	-4.16498	-3.48479	0.76069	-3.6503
	Solyc03g123460	down	-1.03299	4.3466	29.3427	6.06456e-08	4.42713e-06	4.47742	4.1166	4.02753	3.77993	4.0976	3.43236	4.8365	4.83669	4.80687	4.20718	3.76996	4.82669
	Solyc04g006960	up	1.01095	3.17671	9.63172	0.00191246	0.0355183	3.72782	3.62157	3.24717	2.74497	3.00152	3.98697	2.6184	2.18331	2.18821	3.53219	3.24449	2.32997
	Solyc04g007210	up	1.21522	4.77966	43.0821	5.24895e-11	6.49892e-09	4.81058	4.48448	4.68797	5.33284	5.42203	5.16284	4.464	3.87669	3.86879	4.66101	5.30591	4.06982
	Solyc04g007470	up	1.72712	2.3077	42.8882	5.79599e-11	7.10656e-09	1.97553	2.31606	1.86854	2.91225	3.01098	3.0762	1.2158	0.904261	1.6784	2.05338	2.99981	1.26615
	Solyc04g007590	up	3.11442	0.658965	12.4942	0.000408208	0.0104252	1.69526	1.15798	0.768807	-0.483877	-0.779879	2.15109	-2.09102	-1.21895	-3.09034	1.20735	0.295778	-2.13343
	Solyc04g007800	up	2.02941	3.22693	41.5908	1.1252e-10	1.32547e-08	3.43546	3.76214	2.91594	3.5146	3.58625	4.17386	1.17826	2.04078	1.95571	3.37118	3.75824	1.72491
	Solyc04g008430	up	1.28088	0.83308	13.332	0.000260915	0.00724994	0.587253	0.916795	0.850996	0.984572	1.21439	1.54767	-0.266595	0.29948	-0.0280548	0.785015	1.24888	0.00161017
	Solyc04g010285	up	6.48752	-1.4554	27.0146	2.01922e-07	1.34214e-05	-1.53502	-4.16498	-2.68379	-0.277642	-0.654984	-0.831845	-4.16498	-4.16498	-4.16498	-2.7946	-0.588157	-4.16498
	Solyc04g011670	up	1.59836	3.97306	103.148	3.11097e-24	1.37854e-21	2.99517	2.83903	2.95363	5.01622	4.83577	4.78702	3.35853	3.38083	3.10892	2.92928	4.87967	3.28276
	Solyc04g011690	up	5.1826	1.7948	88.5486	4.96004e-21	1.69298e-18	2.34768	1.36684	1.10658	2.99411	2.7537	2.41719	-2.51409	-3.19557	-1.23194	1.60703	2.72167	-2.31387
	Solyc04g014510	up	1.38088	5.43583	9.68197	0.00186085	0.0347479	5.89302	5.80868	6.30326	4.53179	4.838	6.47108	3.56897	4.35943	4.43401	6.00165	5.28029	4.1208
	Solyc04g015120	up	3.88929	-0.212463	33.5109	7.08665e-09	5.88798e-07	-0.207789	-0.808326	-0.724712	-0.0148423	0.662741	1.09507	-3.11525	-1.89231	-4.16498	-0.580276	0.580989	-3.05751
	Solyc04g015750	up	1.75594	8.65679	105.36	1.01854e-24	4.67751e-22	8.46816	8.29492	8.62257	9.55404	9.34676	9.17872	7.88723	7.47882	7.42559	8.46189	9.35984	7.59722
	Solyc04g016430	up	5.59186	-1.52987	14.1695	0.000167057	0.00500574	-0.656533	-2.13598	-1.30277	-3.17542	-1.4276	-0.568604	-4.16498	-4.16498	-4.16498	-1.3651	-1.72388	-4.16498
	Solyc04g017720	up	2.09086	2.56358	8.93802	0.00279295	0.0468112	4.38456	3.68717	1.5619	2.69691	1.77671	1.60212	1.0175	-0.636608	-1.03679	3.21121	2.02525	-0.218633
	Solyc04g049897	up	3.31904	-2.2495	10.0581	0.00151682	0.0297003	-4.16498	-4.16498	-3.2421	-1.8598	-1.64801	-1.56964	-4.16498	-3.19557	-4.16498	-3.85735	-1.69248	-3.84184
	Solyc04g050730	down	-1.6662	2.01675	15.9643	6.45484e-05	0.00225562	1.20945	0.331256	-0.226287	1.94364	0.563405	1.23949	3.24511	2.89257	2.83741	0.438141	1.24885	2.9917
	Solyc04g051690	up	2.83744	-0.12785	16.5298	4.78924e-05	0.00173621	-3.13782	-1.81214	-0.6103	1.33808	1.11265	-0.0657994	-1.76429	-1.41047	-2.05442	-1.85342	0.794977	-1.74306
	Solyc04g053110	up	2.36294	0.755777	12.2799	0.000457867	0.0114503	1.74592	1.08198	1.03806	0.622169	-0.779879	1.91337	-1.49806	-0.898593	-1.45768	1.28865	0.58522	-1.28478
	Solyc04g054220	up	8.25981	2.10892	161.744	4.706e-37	5.168e-34	2.15495	1.62774	2.56049	2.56914	3.34593	3.04705	-4.16498	-4.16498	-3.09034	2.11439	2.98738	-3.80677
	Solyc04g054520	up	1.15444	4.55915	61.3866	4.68998e-15	8.77478e-13	4.25063	4.32053	4.26931	5.33483	5.13255	4.91891	4.05166	3.93327	3.97444	4.28016	5.12876	3.98645
	Solyc04g054790	up	1.45869	0.139484	10.4863	0.00120263	0.0249291	0.208131	-0.345754	0.489752	0.622169	0.14889	0.753944	-0.9078	-0.521534	-1.23194	0.117376	0.508334	-0.887091
	Solyc04g056380	up	1.37049	0.825647	9.26725	0.00233288	0.0414063	0.41011	1.19453	0.850996	1.83675	0.563405	1.05659	0.250012	-0.315729	-0.221944	0.818546	1.15225	-0.0958871
	Solyc04g057980	up	1.17162	4.54579	45.1914	1.78688e-11	2.31452e-09	4.28306	4.43187	4.72738	5.17651	5.03395	4.87535	3.99288	3.60716	3.96877	4.48077	5.0286	3.85627
	Solyc04g064530	up	2.00733	1.43475	12.4698	0.000413594	0.0105325	-0.945984	0.57253	1.67904	2.15417	2.65014	1.97657	0.387947	-0.315729	0.730376	0.435195	2.2603	0.267531
	Solyc04g064620	down	-1.40046	5.05388	16.4402	5.02098e-05	0.00181171	5.22416	5.35732	3.80114	4.53521	4.26565	3.84177	5.82602	5.71722	5.3313	4.79421	4.21421	5.62485
	Solyc04g064630	down	-1.85109	0.210671	12.3285	0.000446101	0.0112116	0.208131	-0.222093	-0.848986	-0.184621	-2.22602	-0.694228	0.787636	0.775147	1.22491	-0.287649	-1.03496	0.92923
	Solyc04g064880	down	-2.8342	-0.917977	18.4275	1.76496e-05	0.000722517	-1.79983	-3.14558	-1.49247	-1.8598	-3.20539	-2.57171	0.387947	-0.315729	-0.121745	-2.14596	-2.54563	-0.016509
	Solyc04g064900	down	-1.52253	2.56151	37.1636	1.08623e-09	1.04319e-07	2.34768	1.77981	2.47235	1.85877	1.5619	1.80146	3.27214	3.0682	3.40609	2.19995	1.74071	3.24881
	Solyc04g071340	up	1.51368	6.08107	143.048	5.73784e-33	4.52895e-30	5.98815	5.93151	6.12981	6.64617	6.76071	6.61484	5.21166	5.13522	5.14107	6.01649	6.67391	5.16265
	Solyc04g071400	up	1.6782	2.53063	20.4985	5.96777e-06	0.000277993	3.35615	3.03316	2.52337	2.00417	2.74239	3.32313	1.0175	1.35945	0.976293	2.97089	2.6899	1.11775
	Solyc04g071523	up	4.16168	-0.66761	20.3372	6.49271e-06	0.000299257	-0.947111	-4.16498	-0.984982	0.399902	-0.154543	0.54743	-3.11525	-4.16498	-2.48133	-2.03236	0.264263	-3.25385
	Solyc04g072070	up	3.86995	-1.27023	17.3672	3.08104e-05	0.00117957	-2.12442	-1.32453	-2.68379	0.137044	-1.4276	-0.568604	-3.11525	-3.19557	-4.16498	-2.04425	-0.619721	-3.49193
	Solyc04g072470	up	2.97263	0.694978	11.9259	0.000553597	0.0132413	1.9104	0.872365	0.437505	-0.72459	0.0791806	2.18716	-3.11525	-1.41047	-1.23194	1.07342	0.513918	-1.91922
	Solyc04g072740	down	-1.08944	4.51832	19.2925	1.12147e-05	0.000487541	4.45479	3.6678	3.73233	4.0187	4.28465	3.89181	4.83951	5.52144	5.03565	3.95164	4.06506	5.1322
	Solyc04g072920	down	-1.26527	1.85333	12.5998	0.000385782	0.00999394	0.641776	1.04242	1.26487	0.943946	1.18127	1.82455	1.9975	2.93349	2.74754	0.983024	1.31659	2.55951
	Solyc04g074350	up	2.96041	1.14975	59.3293	1.33375e-14	2.37239e-12	-0.207789	-0.128825	0.326968	2.32209	2.05789	2.37089	0.0147099	-0.898593	-1.23194	-0.00321529	2.25029	-0.705274
	Solyc04g074640	up	1.97287	5.23571	57.0683	4.20946e-14	6.9949e-12	5.33176	5.46596	4.90552	6.29598	5.70006	5.58216	4.33342	3.79578	3.52678	5.23441	5.8594	3.88533
	Solyc04g074680	up	5.22877	-1.68952	9.62569	0.00191875	0.0355773	-1.11777	-0.544656	-4.16498	-1.01367	-1.90826	-2.57171	-4.16498	-4.16498	-4.16498	-1.94247	-1.83121	-4.16498
	Solyc04g074770	up	2.86613	4.31579	52.4147	4.49352e-13	6.75579e-11	3.70239	4.46591	2.78616	5.57397	5.3039	5.03727	2.77749	1.81852	2.63747	3.65149	5.30505	2.41116
	Solyc04g074810	up	1.3668	3.16059	19.4276	1.04485e-05	0.000458172	4.20609	3.81591	3.98529	2.32209	2.68447	3.48403	1.45432	1.38917	1.81109	4.00243	2.8302	1.55153
	Solyc04g076280	up	1.54977	1.57051	17.4884	2.89064e-05	0.0011146	2.47326	1.93907	1.88814	1.5958	1.7086	1.75415	0.572889	-0.761662	0.43375	2.10016	1.68618	0.0816591
	Solyc04g076870	up	1.28335	6.8341	61.5692	4.27449e-15	8.0571e-13	6.70972	6.52906	6.69471	7.57147	7.44322	7.22888	6.39934	6.09402	5.87378	6.6445	7.41452	6.12238
	Solyc04g077210	up	4.32755	0.911462	19.2387	1.15354e-05	0.000498053	1.88802	1.12048	1.86854	-1.1833	-0.0723553	2.30676	-4.16498	-2.21111	-2.48133	1.62568	0.350366	-2.95247
	Solyc04g077220	up	1.32691	2.72061	10.2832	0.00134244	0.0272567	3.72782	3.12123	3.09525	1.85877	2.32378	3.52689	1.45432	1.65689	1.1467	3.31477	2.56981	1.4193
	Solyc04g077240	up	4.06775	-1.41085	16.1976	5.70653e-05	0.00201922	-1.32135	-2.13598	-0.984982	-1.8598	-0.540045	-0.983986	-3.11525	-4.16498	-4.16498	-1.48077	-1.12794	-3.81507
	Solyc04g077650	down	-1.05648	5.04758	41.3247	1.28932e-10	1.50072e-08	4.99989	4.69684	5.05822	4.67829	4.50143	4.22296	5.68927	5.45975	5.44191	4.91831	4.46756	5.53031
	Solyc04g079070	down	-1.00024	5.84573	59.6702	1.12161e-14	2.02355e-12	5.42526	5.56246	5.37348	5.55009	5.37891	5.32482	6.49276	6.35158	6.41442	5.45373	5.41794	6.41959
	Solyc04g079240	up	3.0404	-1.60917	15.095	0.000102232	0.00334913	-3.13782	-4.16498	-2.68379	-1.01367	-0.91662	-0.453047	-4.16498	-3.19557	-2.48133	-3.32886	-0.794446	-3.28063
	Solyc04g079700	up	1.44716	5.54509	10.5042	0.00119105	0.02476	6.46056	6.13091	5.51581	5.91868	4.72188	6.14895	5.04639	3.78465	3.47971	6.03576	5.5965	4.10358
	Solyc04g080380	up	1.05563	3.37059	10.3431	0.00129957	0.0266001	2.7953	3.52442	4.12811	3.50066	3.77573	3.70539	2.6734	2.09589	2.95681	3.48261	3.6606	2.57537
	Solyc04g080500	up	5.92281	0.423572	43.2385	4.84579e-11	6.0893e-09	1.64276	1.19453	-0.066854	0.515312	1.14737	0.37049	-3.11525	-4.16498	-4.16498	0.923477	0.677722	-3.81507
	Solyc04g080970	up	8.48734	0.998765	47.9309	4.41515e-12	5.90041e-10	1.31388	2.12098	1.46083	0.207383	0.216302	2.41719	-4.16498	-4.16498	-4.16498	1.6319	0.946959	-4.16498
	Solyc04g081000	up	1.51222	6.45505	92.468	6.84205e-22	2.40023e-19	6.96564	7.19659	7.01188	6.68598	6.73109	6.28833	4.94945	5.13082	5.12504	7.05804	6.56847	5.06844
	Solyc04g082000	up	1.46067	2.37525	35.1804	3.00538e-09	2.61089e-07	2.11696	2.08257	1.90763	3.30098	2.88293	2.90266	1.86456	1.41835	1.46847	2.03572	3.02885	1.58379
	Solyc04g082010	up	1.80892	8.79018	84.9552	3.05198e-20	9.51692e-18	8.60446	8.66132	8.27156	9.83022	9.46212	9.28825	8.02887	7.54479	7.5833	8.51244	9.52686	7.71899
	Solyc04g082120	up	3.72314	4.33517	17.045	3.6505e-05	0.00137618	4.30232	4.31693	5.09452	2.84764	5.29619	5.7244	-0.9078	-0.222882	2.65169	4.57126	4.62274	0.507004
	Solyc05g004000	down	-2.674	0.487603	37.8093	7.80071e-10	7.84981e-08	-0.947111	-0.544656	-0.144369	-1.37557	-0.91662	-0.831845	1.13972	1.81852	1.53227	-0.545379	-1.04135	1.49684
	Solyc05g005170	up	1.84297	4.49776	14.7402	0.000123387	0.00392509	5.95501	5.92067	4.76421	3.94856	3.05736	4.14205	2.80238	1.50229	0.882894	5.54663	3.71599	1.72919
	Solyc05g005540	down	-1.07388	2.18736	13.9854	0.000184235	0.0054406	1.94273	1.46618	2.27284	2.00749	1.35532	1.51415	2.78026	2.56169	2.793	1.89391	1.62565	2.71165
	Solyc05g005810	down	-1.09354	3.45403	25.7398	3.90688e-07	2.50457e-05	3.30639	3.17709	3.19328	2.48669	2.79807	3.30685	3.92113	3.94332	4.10425	3.22559	2.86387	3.98957
	Solyc05g006110	up	1.77061	3.2049	61.8594	3.68887e-15	7.00552e-13	2.68279	3.02303	2.77568	4.16152	4.01541	3.69916	2.47096	2.21684	1.88521	2.82717	3.9587	2.191
	Solyc05g006160	up	1.25074	0.709552	9.18018	0.00244649	0.0426457	1.37953	1.33212	0.681651	0.569729	0.662741	1.09507	-0.166607	-0.898593	-0.221944	1.1311	0.775846	-0.429048
	Solyc05g006830	up	2.60502	4.68512	21.1118	4.33246e-06	0.000210846	5.1455	5.3157	5.01875	3.86399	3.81405	6.27003	2.32427	2.38853	2.8621	5.15998	4.64936	2.52496
	Solyc05g006850	down	-2.11307	3.7075	25.1759	5.23331e-07	3.26378e-05	2.53281	2.24813	3.1531	2.0238	1.92414	3.40964	4.17568	4.70595	5.14026	2.64468	2.45253	4.67396
	Solyc05g007780	up	2.90534	4.35125	257.567	5.81843e-58	1.46962e-54	3.69597	3.57381	3.97158	5.47107	5.34747	5.3373	2.76488	2.24962	2.42198	3.74712	5.38528	2.47883
	Solyc05g008895	up	1.57158	0.0587099	9.75768	0.00178575	0.0337608	0.133991	-0.222093	0.681651	0.207383	-0.0723553	0.801263	-1.49806	-1.21895	-0.711361	0.19785	0.312097	-1.14279
	Solyc05g009310	up	3.46738	0.382867	39.3531	3.53699e-10	3.81784e-08	-0.307577	0.0413643	-0.984982	1.4869	1.53593	1.16909	-2.51409	-0.898593	-3.09034	-0.417065	1.39731	-2.16767
	Solyc05g009880	up	1.06279	2.78433	17.0032	3.73163e-05	0.00140258	3.01775	3.20423	2.91594	2.67222	2.95329	3.40199	1.68596	2.21684	2.00086	3.04597	3.00917	1.96789
	Solyc05g012280	up	2.24548	-0.42667	10.1074	0.00147671	0.0292514	0.587253	0.456931	-0.848986	-1.01367	-0.334456	-0.153308	-2.09102	-3.19557	-2.05442	0.0650659	-0.500478	-2.447
	Solyc05g013630	up	1.52983	7.1875	31.0731	2.4849e-08	1.90771e-06	7.87345	7.61627	7.1648	7.09707	7.10047	8.09442	5.95371	6.03574	5.95634	7.55151	7.43065	5.98193
	Solyc05g013810	up	1.02884	2.74089	14.9585	0.0001099	0.00354768	3.14589	2.60111	3.01731	2.64714	3.06645	3.29861	1.68596	2.04078	2.24561	2.92144	3.00407	1.99078
	Solyc05g014280	up	4.80745	0.12404	30.8733	2.75441e-08	2.09551e-06	-2.12442	-1.81214	0.143454	0.622169	1.58741	1.37076	-3.11525	-2.21111	-4.16498	-1.26437	1.19345	-3.16378
	Solyc05g015180	up	5.13585	-1.96967	10.7644	0.0010347	0.0222422	-2.43607	-1.13121	-3.2421	-1.18817	-3.20539	-1.56964	-4.16498	-4.16498	-4.16498	-2.26979	-1.98773	-4.16498
	Solyc05g015320	up	2.1481	1.09989	37.7646	7.98165e-10	7.9684e-08	1.34708	1.48749	1.38008	1.4869	1.63711	1.46192	-0.754739	-0.0533951	-1.03679	1.40488	1.52865	-0.614975
	Solyc05g015890	down	-5.44425	-2.16011	11.4513	0.000714446	0.0163752	-4.16498	-2.55421	-3.2421	-4.16498	-4.16498	-4.16498	-0.490119	-3.19557	-2.05442	-3.32043	-4.16498	-1.91337
	Solyc05g018657	down	-2.9538	-1.71598	10.6836	0.0010809	0.0230261	-1.31137	-1.81214	-2.68379	-3.17542	-4.16498	-3.15874	-1.76429	-1.41047	-1.03679	-1.93577	-3.49971	-1.40385
	Solyc05g025600	up	1.24076	6.22336	63.224	1.84488e-15	3.66912e-13	6.1497	6.29242	5.95141	6.92191	6.70063	6.61976	5.3839	5.70689	5.42544	6.13117	6.74743	5.50541
	Solyc05g025890	down	-1.60631	0.558933	10.5355	0.00117105	0.0244836	0.887195	1.15798	0.810487	-0.599219	-0.91662	-0.694228	0.736794	-0.222882	1.43691	0.951887	-0.736689	0.650273
	Solyc05g026490	up	5.65878	-2.01592	16.9166	3.90578e-05	0.0014572	-4.16498	-3.14558	-2.68379	-0.72459	-1.4276	-2.15563	-4.16498	-4.16498	-4.16498	-3.33145	-1.43594	-4.16498
	Solyc05g041820	down	-4.70647	-2.24472	10.265	0.00135575	0.0274387	-2.54391	-1.81214	-3.2421	-4.16498	-4.16498	-4.16498	-3.11525	-2.21111	-1.45768	-2.53272	-4.16498	-2.26135
	Solyc05g046320	up	1.9434	0.472364	9.62193	0.00192268	0.0355773	1.0573	1.23018	0.58889	0.207383	-0.654984	1.54767	-0.754739	-1.41047	-1.45768	0.95879	0.366689	-1.20763
	Solyc05g047580	down	-1.47307	2.11421	14.7413	0.000123314	0.00392509	1.81872	1.12048	1.72335	2.06227	1.21439	0.490827	3.10209	2.80708	2.60858	1.55418	1.25583	2.83925
	Solyc05g047680	up	4.44792	3.81855	107.644	3.21655e-25	1.59301e-22	4.09196	4.62166	2.97211	4.51455	4.71899	4.59227	0.736794	-0.315729	0.0599202	3.89524	4.60861	0.160328
	Solyc05g050110	up	2.30849	4.22766	114.787	8.75993e-27	4.70762e-24	3.62331	3.38905	4.14256	5.05727	5.12167	5.24191	2.77749	3.0682	2.63747	3.71831	5.14028	2.82772
	Solyc05g050130	up	1.85076	0.722182	11.4664	0.000708641	0.0162824	0.471606	0.57253	0.768807	0.207383	1.42712	1.86964	-1.76429	-0.0533951	-0.121745	0.604314	1.16805	-0.646476
	Solyc05g051220	up	1.37041	3.18841	25.455	4.52822e-07	2.86651e-05	3.34798	3.14009	2.93491	4.04295	3.7979	3.17831	2.65985	2.32843	2.00086	3.14099	3.67305	2.32972
	Solyc05g051750	down	-1.56675	6.9105	64.0985	1.18354e-15	2.45032e-13	6.20395	5.81309	5.74132	6.06613	6.44134	6.19064	7.46271	8.07406	7.82097	5.91946	6.2327	7.78591
	Solyc05g052700	up	1.14933	0.909812	12.5027	0.000406358	0.0104047	0.587253	0.456931	0.725887	1.45837	1.30942	1.51965	0.250012	-0.0533951	0.67573	0.590024	1.42915	0.290783
	Solyc05g052890	up	3.39709	0.507162	32.204	1.38803e-08	1.1062e-06	0.587253	1.15798	-0.6103	0.943946	1.18127	1.51965	-1.76429	-1.63137	-2.48133	0.378311	1.21495	-1.959
	Solyc05g053120	up	1.82779	-0.0360729	12.8051	0.000345681	0.00908554	-0.580785	-0.573499	0.121235	0.493801	0.970794	0.0499168	-1.43411	-1.61476	-0.592035	-0.34435	0.504837	-1.21363
	Solyc05g053180	up	1.82984	-0.682186	9.30832	0.00228116	0.0406616	-1.53502	-0.670476	-0.848986	0.207383	-0.241697	-0.568604	-3.11525	-1.21895	-1.72541	-1.01816	-0.200973	-2.01987
	Solyc05g053400	up	1.01118	1.96498	11.2076	0.000814624	0.0183712	1.45482	1.41326	1.54566	2.85428	1.90083	2.71255	1.67874	1.44486	1.50576	1.47125	2.48922	1.54312
	Solyc05g053600	up	2.1614	-0.0678503	15.6404	7.66022e-05	0.00261462	-0.656533	-0.960753	0.437665	0.331502	0.579867	0.705021	-2.09102	-1.21895	-1.23194	-0.393207	0.538797	-1.51397
	Solyc05g054750	up	7.98803	1.64051	206.2	9.2657e-47	1.46271e-43	1.24511	1.33572	1.03806	2.58244	2.7989	2.8586	-4.16498	-4.16498	-3.09034	1.2063	2.74665	-3.80677
	Solyc05g054820	up	2.07591	0.08592	16.0142	6.28698e-05	0.00220858	-2.12442	-0.222093	-0.984982	1.17213	1.0406	0.654379	-0.490119	-1.41047	-1.23194	-1.1105	0.955704	-1.04418
	Solyc05g054860	up	1.15655	2.90173	24.5854	7.109e-07	4.23488e-05	3.21052	2.78013	2.90636	3.34556	3.33091	3.23971	1.9086	2.52865	1.93259	2.96567	3.30539	2.12328
	Solyc05g055050	down	-4.55401	-2.63167	9.23146	0.00237891	0.0419014	-4.16498	-4.16498	-4.16498	-4.16498	-4.16498	-4.16498	-1.76429	-3.19557	-2.05442	-4.16498	-4.16498	-2.33809
	Solyc05g055200	up	1.54618	0.109799	9.57535	0.00197207	0.0363581	0.278646	0.331256	0.437505	-0.0148423	0.00540131	0.934565	-1.2734	-0.521534	-1.72541	0.349136	0.308375	-1.17345
	Solyc05g056050	up	2.56183	7.38422	99.7911	1.69349e-23	6.58065e-21	6.81397	6.87952	6.82653	8.63898	8.33589	8.07312	6.34835	5.50109	5.36523	6.84001	8.34933	5.73823
	Solyc05g056060	up	1.6918	8.3068	111.788	3.97596e-26	2.04949e-23	7.88662	8.07114	7.82888	9.28925	8.97575	8.92742	7.61229	7.23112	7.27087	7.92888	9.06414	7.37143
	Solyc05g056477	down	-2.4987	0.544074	15.2312	9.51212e-05	0.00314473	1.31388	-0.32181	0.810487	-2.59396	-0.779879	-0.983986	0.250012	1.02276	1.6784	0.600853	-1.45261	0.983726
	Solyc05g056620	up	3.16964	5.28089	300.943	2.05319e-67	7.4085e-64	5.80214	5.83746	5.61329	5.88822	5.80024	5.73924	2.39118	2.43201	3.04568	5.75096	5.80923	2.62296
	Solyc06g005310	down	-2.65048	-0.789679	14.7966	0.000119753	0.00384336	-1.79983	-1.54784	-0.984982	-1.37557	-3.20539	-3.15874	0.513837	-0.315729	-0.329626	-1.44422	-2.5799	-0.0438394
	Solyc06g005710	up	1.41013	6.33251	43.0463	5.34587e-11	6.58663e-09	6.27377	6.35432	6.31631	7.22432	6.81513	6.50388	5.82905	5.30074	5.19471	6.3148	6.84778	5.4415
	Solyc06g005750	up	2.46105	5.72681	21.9822	2.75191e-06	0.000140989	5.79268	5.52635	3.38458	6.99951	6.63837	6.32968	4.87807	3.65608	3.81291	4.9012	6.65585	4.11569
	Solyc06g005910	up	1.61798	1.93498	22.4082	2.20434e-06	0.000117711	1.05863	1.68023	1.72335	2.25725	3.00152	2.61554	1.32288	0.476042	1.26247	1.4874	2.62477	1.02047
	Solyc06g006022	up	1.93866	1.33404	37.1992	1.06658e-09	1.02823e-07	1.17289	0.456931	1.03806	2.0238	2.24583	2.03712	0.0974822	0.168497	0.366335	0.889294	2.10225	0.210771
	Solyc06g006090	down	-1.23901	3.80932	31.8421	1.67229e-08	1.31584e-06	3.51794	3.90131	3.11202	3.23204	3.27706	2.99713	4.1993	4.40996	4.5913	3.51042	3.16874	4.40018
	Solyc06g006110	up	8.64256	1.24923	64.1083	1.17765e-15	2.45032e-13	2.85421	1.73088	0.725887	1.56934	1.61248	1.30662	-4.16498	-4.16498	-4.16498	1.77032	1.49614	-4.16498
	Solyc06g007160	up	2.83378	1.57543	62.638	2.48408e-15	4.82637e-13	1.31388	1.15798	0.850996	2.24057	2.57514	2.69285	0.250012	-0.222882	-1.06667	1.10762	2.50285	-0.346512
	Solyc06g007960	up	1.89042	-0.471223	11.4231	0.000725374	0.0165805	-0.307577	-0.128825	-0.226287	-0.184621	-0.154543	-0.346064	-1.76429	-1.21895	-4.16498	-0.220896	-0.228409	-2.38274
	Solyc06g008910	up	5.41329	-2.08832	15.5311	8.11591e-05	0.00272958	-2.54391	-2.55421	-4.16498	-2.18067	-1.06769	-1.56964	-4.16498	-4.16498	-4.16498	-3.0877	-1.606	-4.16498
	Solyc06g009710	up	6.74752	-0.47946	21.0166	4.55325e-06	0.000220318	-0.114459	0.515888	0.00670807	-1.59746	-2.22602	0.891485	-4.16498	-4.16498	-4.16498	0.136046	-0.977333	-4.16498
	Solyc06g019200	up	1.2042	4.33121	75.8926	2.99527e-18	7.88067e-16	4.51807	4.35726	4.52853	4.80845	4.68931	4.68025	3.59056	3.44591	3.54214	4.46796	4.72601	3.5262
	Solyc06g035530	up	2.34891	0.0662258	13.5995	0.000226248	0.0064281	0.793975	0.627032	-0.6103	0.569729	-0.241697	0.801263	-3.11525	-1.21895	-1.45768	0.270236	0.376432	-1.93063
	Solyc06g035760	up	1.65702	3.89732	20.8954	4.85053e-06	0.000232035	4.41296	5.10662	4.06494	4.48654	3.40451	3.73006	2.70014	1.75146	2.30082	4.52817	3.8737	2.25081
	Solyc06g051080	up	1.36662	5.62009	86.1651	1.65524e-20	5.36001e-18	5.26804	5.12379	5.47049	6.40466	6.21638	6.21956	5.05677	4.91028	4.77148	5.28744	6.2802	4.91284
	Solyc06g051680	up	2.04184	-0.319847	11.1448	0.000842656	0.0189021	-0.947111	-0.0412223	-0.226287	0.274451	0.662741	-0.831845	-1.76429	-2.21111	-1.23194	-0.404873	0.0351157	-1.73578
	Solyc06g051960	up	1.14723	4.11201	36.865	1.26597e-09	1.19154e-07	4.57527	4.76829	4.50016	4.14056	4.0769	4.4215	2.94331	2.85046	3.3892	4.61457	4.21299	3.06099
	Solyc06g053830	up	1.66917	2.48291	34.8969	3.47636e-09	2.99679e-07	1.86529	1.60076	2.20181	3.18923	3.5863	2.99713	1.3901	1.96386	1.43691	1.88928	3.25755	1.59696
	Solyc06g054260	up	1.58194	8.57374	58.2099	2.35589e-14	4.0206e-12	8.4659	8.45486	8.51545	9.50248	9.19581	8.83247	7.95318	7.56623	7.25918	8.47874	9.17692	7.59286
	Solyc06g054570	up	4.61047	-2.2906	9.6041	0.00194144	0.0358719	-2.12442	-2.13598	-4.16498	-2.18067	-1.90826	-2.57171	-4.16498	-4.16498	-4.16498	-2.80846	-2.22021	-4.16498
	Solyc06g060310	up	1.62246	4.88445	125.939	3.17042e-29	1.86229e-26	4.72478	4.45562	4.75355	5.51626	5.5182	5.6898	4.0974	3.90782	3.85655	4.64465	5.57475	3.95393
	Solyc06g060480	down	-1.54094	-0.0571545	9.62407	0.00192044	0.0355773	-0.947111	0.0413643	-0.504298	-0.72459	-1.23645	-0.831845	0.0974822	1.0602	0.221247	-0.470015	-0.930963	0.459641
	Solyc06g060770	up	1.40449	1.3747	20.1427	7.18742e-06	0.000327099	1.37953	1.39629	1.65636	1.69706	1.50949	2.09523	0.387947	0.360767	0.498155	1.47739	1.76726	0.415623
	Solyc06g060830	up	2.02624	4.39999	66.4074	3.66717e-16	8.05439e-14	4.38855	4.49551	4.4392	4.569	5.02464	5.43617	3.39171	2.61921	2.99078	4.44109	5.00994	3.00057
	Solyc06g061027	up	1.48051	9.15386	22.4134	2.19832e-06	0.000117638	9.55116	9.43372	8.55092	9.83123	9.69872	9.43911	8.70964	7.52388	8.07914	9.1786	9.65635	8.10422
	Solyc06g061100	up	5.35437	-1.87457	10.1992	0.001405	0.0282095	-1.53502	-1.81214	-2.68379	-3.17542	-3.20539	-0.346064	-4.16498	-4.16498	-4.16498	-2.01032	-2.24229	-4.16498
	Solyc06g062370	up	7.61175	0.98909	50.357	1.28172e-12	1.83942e-10	-1.53502	-0.544656	-1.49247	1.39946	3.43995	0.976396	-4.16498	-3.19557	-4.16498	-1.19072	1.9386	-3.84184
	Solyc06g062380	up	7.50521	4.03833	165.978	5.59232e-38	6.72622e-35	-0.656533	1.36456	-0.226287	5.57893	5.90611	5.09774	-2.09102	-2.21111	-1.03679	0.16058	5.52759	-1.77964
	Solyc06g062390	up	4.98956	-0.159584	30.8376	2.80544e-08	2.12155e-06	-1.79983	-1.81214	-2.68379	0.721654	1.96371	-0.346064	-3.11525	-3.19557	-3.09034	-2.09859	0.779767	-3.13372
	Solyc06g062460	up	1.43425	1.14503	16.9973	3.74339e-05	0.00140491	0.641776	1.08198	1.26487	1.69706	1.27844	1.97657	0.387947	0.360767	0.0599202	0.996209	1.65069	0.269545
	Solyc06g062550	up	2.98573	-1.29914	9.11306	0.0025379	0.0435807	-2.54391	-0.544656	-2.17686	-1.31062	-0.779879	-0.453047	-4.16498	-4.16498	-2.05442	-1.75514	-0.84785	-3.46146
	Solyc06g063370	up	1.66583	10.4346	83.6563	5.88724e-20	1.72907e-17	10.134	10.2096	10.1315	11.438	11.113	10.8714	9.78761	9.30989	9.33195	10.1584	11.1408	9.47648
	Solyc06g065490	up	1.52271	2.85165	32.5972	1.13378e-08	9.14922e-07	2.66973	2.53139	2.57265	3.94342	3.27706	3.19612	1.86201	1.79651	2.30082	2.59125	3.4722	1.98645
	Solyc06g065630	up	3.04221	2.21541	27.7259	1.39777e-07	9.64615e-06	3.0584	3.01283	3.14497	1.33808	1.11265	3.2311	-0.61637	-0.414965	-1.23194	3.07207	1.89394	-0.754425
	Solyc06g065820	up	2.03025	-0.77185	9.43687	0.00212666	0.0385885	-0.794518	-0.960753	-0.226287	0.0631744	-0.540045	-1.34695	-2.51409	-2.21111	-2.05442	-0.660519	-0.60794	-2.25987
	Solyc06g065870	up	2.16384	-0.82894	11.5269	0.000685953	0.0158812	-0.5306	-0.128825	-0.724712	-0.599219	-0.91662	-0.694228	-2.51409	-3.19557	-2.05442	-0.461379	-0.736689	-2.58803
	Solyc06g065990	up	1.42893	4.5899	49.7778	1.72183e-12	2.42961e-10	4.07849	4.37727	4.48737	5.56564	5.04089	5.06177	4.07714	3.73921	3.59463	4.31438	5.22277	3.80366
	Solyc06g066630	up	2.03936	-0.0212839	10.6964	0.00107343	0.0229186	1.09687	0.193579	-0.848986	0.515312	0.00540131	0.168775	-1.49806	-1.41047	-2.05442	0.147155	0.229829	-1.65432
	Solyc06g066640	up	1.96405	5.56183	107.106	4.21953e-25	2.04955e-22	5.40135	5.09749	5.47265	6.52143	6.31441	6.13055	4.68441	4.23278	4.12989	5.32383	6.32213	4.34903
	Solyc06g066650	up	1.19482	0.775567	10.6732	0.00108698	0.0231101	0.471606	-0.222093	0.326968	1.06254	1.44467	1.60212	-0.073102	0.582784	0.0599202	0.19216	1.36978	0.189867
	Solyc06g066750	up	2.36212	1.13068	11.6115	0.00065544	0.0152863	2.88843	2.61466	1.29455	0.399902	-1.23645	-0.153308	-2.09102	-2.21111	-2.48133	2.26588	-0.329953	-2.26115
	Solyc06g066830	up	4.04277	1.5605	19.5644	9.72636e-06	0.000431097	2.26325	1.33212	2.74376	0.274451	-0.154543	3.16027	-2.51409	-1.89231	-1.45768	2.11304	1.09339	-1.95469
	Solyc06g067870	up	3.24061	-0.951278	11.2302	0.000804769	0.0181652	-0.5306	-2.55421	-0.226287	-1.37557	0.0791806	-0.831845	-2.51409	-4.16498	-3.09034	-1.1037	-0.709412	-3.25647
	Solyc06g068040	up	6.20079	-0.964043	23.6463	1.15771e-06	6.54172e-05	0.133991	-0.808326	-0.848986	-1.59746	-0.154543	-1.15408	-4.16498	-4.16498	-4.16498	-0.507774	-0.968696	-4.16498
	Solyc06g069730	up	5.07977	5.45138	144.066	3.43741e-33	2.89407e-30	4.54767	4.19536	3.32831	7.09947	6.65095	6.55006	2.43958	1.13227	1.22491	4.02378	6.76683	1.59892
	Solyc06g071030	up	1.28438	1.30536	10.6085	0.00112571	0.023714	1.0573	0.119478	0.437505	1.96404	2.02092	2.05675	1.0594	-0.222882	1.10595	0.538096	2.01391	0.647488
	Solyc06g071150	up	1.29201	1.14976	12.6345	0.000378683	0.00984031	1.01662	1.00175	0.383295	1.9641	1.4551	1.7299	0.387947	-0.0533951	0.930349	0.800555	1.71637	0.421634
	Solyc06g072230	down	-1.33061	2.02933	19.4099	1.05461e-05	0.000461653	1.97553	1.04242	1.26487	1.3691	1.48255	1.40179	2.42362	2.97328	2.74754	1.42761	1.41781	2.71481
	Solyc06g072350	up	3.84986	3.65613	63.3671	1.7156e-15	3.4391e-13	5.19026	4.05537	3.17719	3.8085	4.25312	3.83041	0.513837	0.0982578	-0.121745	4.14094	3.96401	0.16345
	Solyc06g072460	up	1.84383	-0.712101	10.4008	0.00125963	0.0259086	-2.12442	-1.81214	-1.49247	-0.0148423	0.341514	-0.246469	-1.49806	-1.0499	-3.09034	-1.80968	0.0267342	-1.87943
	Solyc06g072710	up	1.08618	5.3447	80.1077	3.54549e-19	9.73392e-17	5.09315	5.0999	5.15442	5.88017	5.90421	5.87377	4.91277	4.75935	4.72514	5.11582	5.88605	4.79909
	Solyc06g072840	down	-1.59547	8.47478	105.95	7.56189e-25	3.537e-22	8.33742	8.13841	8.23894	7.45748	7.79264	7.43453	8.98598	9.11561	9.37068	8.23826	7.56155	9.15742
	Solyc06g073260	up	1.72084	6.42375	136.23	1.77663e-31	1.28212e-28	6.02444	6.18778	6.30406	7.29132	7.09853	7.04442	5.58555	5.25909	5.42544	6.17209	7.14476	5.42336
	Solyc06g073290	up	2.25483	5.36816	127.616	1.36218e-29	8.39167e-27	5.05646	5.06331	5.08283	6.29003	6.28155	6.07507	4.41541	3.6923	3.66646	5.06753	6.21555	3.92472
	Solyc06g073940	up	1.34653	3.77107	12.3258	0.000446729	0.0112162	4.42814	3.90131	4.39917	3.25712	3.37552	4.72396	2.47096	3.012	2.22673	4.24287	3.78553	2.5699
	Solyc06g074200	up	1.78565	8.69554	69.6708	7.0076e-17	1.65419e-14	8.59532	8.77819	8.31105	9.7274	9.3306	9.00541	7.8697	7.48184	7.40212	8.56152	9.35447	7.58455
	Solyc06g074510	up	1.04014	4.41586	35.1851	2.99813e-09	2.61089e-07	4.50342	4.5137	4.58372	4.979	4.80689	4.49129	3.97686	3.6867	3.50344	4.53361	4.75906	3.72233
	Solyc06g074540	up	1.5194	1.42393	12.4042	0.00042838	0.01082	1.72081	1.82714	2.13776	1.02408	1.58741	1.99704	-0.61637	0.819481	-0.329626	1.89523	1.53618	-0.0421717
	Solyc06g082300	up	1.23679	2.18891	20.25	6.79524e-06	0.000310369	2.34768	1.98153	2.15404	2.92315	2.64857	2.32306	1.73849	1.16699	1.3348	2.16108	2.63159	1.41343
	Solyc06g082940	up	1.25887	9.17975	37.0448	1.15447e-09	1.10036e-07	9.15723	9.33002	9.16251	10.0423	9.53107	9.28913	8.68208	8.30482	8.15144	9.21659	9.62083	8.37945
	Solyc06g082950	up	1.67396	7.89808	75.2482	4.15114e-18	1.0485e-15	7.62993	7.63751	7.5648	8.89697	8.61371	8.31736	7.28261	6.846	6.66531	7.61075	8.60935	6.93131
	Solyc06g083080	up	1.15436	4.78821	17.4599	2.93436e-05	0.0011281	5.3136	5.56525	4.91271	4.52864	4.54424	5.45478	3.4401	3.80684	3.98009	5.26385	4.84256	3.74234
	Solyc06g083480	up	3.80927	-1.53234	12.8086	0.000345038	0.00907808	-1.53502	-2.13598	-0.984982	-0.599219	-1.4276	-2.15563	-4.16498	-4.16498	-3.09034	-1.552	-1.39415	-3.80677
	Solyc06g083680	up	1.57358	6.96269	92.5351	6.61404e-22	2.35292e-19	6.80174	7.03593	6.94652	7.82247	7.44469	7.36724	6.1158	6.0406	5.77995	6.92806	7.5448	5.97879
	Solyc06g083700	down	-1.39465	0.174238	13.231	0.000275353	0.00758436	-1.79983	-0.670476	-1.49247	-0.184621	-0.241697	-0.568604	1.0594	1.0602	0.930349	-1.32093	-0.33164	1.01665
	Solyc06g083900	up	2.59597	2.2699	33.2512	8.09916e-09	6.64184e-07	2.7953	2.15847	0.890399	3.18923	3.02038	3.00725	0.974346	0.235475	0.221247	1.94805	3.07228	0.477023
	Solyc06g084050	up	1.41088	6.40746	49.4312	2.05451e-12	2.83567e-10	6.28541	6.4725	6.00324	7.35792	6.92489	6.66249	5.74783	5.60146	5.43575	6.25372	6.98177	5.59501
	Solyc06g084240	up	2.45211	2.53882	68.0232	1.61587e-16	3.71032e-14	3.466	2.90669	3.13681	2.6216	2.6364	3.01731	0.0974822	0.729407	0.142838	3.16983	2.75844	0.323242
	Solyc07g005037	up	6.27176	-1.27958	9.86614	0.00168349	0.0321645	-1.86311	-4.16498	-0.253343	-4.16498	0.107315	-0.672861	-4.16498	-4.16498	-4.16498	-2.09381	-1.57684	-4.16498
	Solyc07g005100	up	1.75473	1.73783	10.5339	0.00117204	0.0244836	1.56024	1.45772	2.91594	0.984572	2.27752	2.44725	-0.166607	0.0244231	0.882894	1.97797	1.90311	0.246903
	Solyc07g005370	up	1.13005	4.64287	39.9979	2.54231e-10	2.8288e-08	4.01278	4.32053	3.66577	5.43064	5.11949	5.40969	4.11737	4.19962	4.27481	3.99969	5.31994	4.19727
	Solyc07g005510	up	1.00487	7.91145	53.7363	2.29287e-13	3.5749e-11	7.6296	7.76457	7.71888	8.56621	8.42105	8.25739	7.58385	7.26855	7.37718	7.70435	8.41488	7.40986
	Solyc07g006030	up	1.47282	6.04424	32.7695	1.03759e-08	8.39983e-07	5.75143	5.14962	6.41772	6.58806	6.72888	6.71705	5.19005	5.22859	5.2044	5.77292	6.678	5.20768
	Solyc07g006380	down	-1.17902	12.3782	17.7205	2.55849e-05	0.00100501	12.9996	12.8778	11.6216	11.5026	11.5958	11.5023	12.6709	12.7543	12.7133	12.4996	11.5336	12.7129
	Solyc07g006560	up	1.29042	4.47266	9.12333	0.00252371	0.0434222	4.83708	4.97152	4.47122	4.49007	4.95531	4.88636	3.99419	1.77416	3.88091	4.75994	4.77725	3.21642
	Solyc07g006570	up	1.00852	8.41296	12.1944	0.000479323	0.0118556	8.49117	8.64438	7.53574	9.17058	8.79184	8.63521	8.28666	7.63428	7.59622	8.22376	8.86588	7.83905
	Solyc07g006870	up	6.70921	-0.666685	19.5216	9.94682e-06	0.000438459	0.41011	-1.81214	0.00670807	-1.01367	-2.22602	0.705021	-4.16498	-4.16498	-4.16498	-0.465108	-0.844891	-4.16498
	Solyc07g007240	up	2.20642	-0.430548	12.9707	0.000316399	0.00847466	0.345875	-0.428935	-0.984982	-0.277642	0.00540131	0.0947421	-2.51409	-1.41047	-2.48133	-0.356014	-0.0591663	-2.1353
	Solyc07g007860	up	3.11453	0.109223	12.4381	0.000420663	0.0106785	0.841338	1.33212	1.07273	-1.8598	-1.23645	0.705021	-2.51409	-2.62095	-4.16498	1.08206	-0.797076	-3.10001
	Solyc07g008230	up	1.81434	0.195194	13.4816	0.000240918	0.00676122	0.931639	0.395461	0.207255	0.622169	-0.154543	0.753944	-1.07905	-1.63137	-1.03679	0.511452	0.40719	-1.24907
	Solyc07g008520	up	1.46329	4.29209	48.1567	3.93488e-12	5.28655e-10	4.17872	4.42035	4.9151	4.87209	4.68985	4.49489	3.37522	3.12229	3.19887	4.50472	4.68561	3.23213
	Solyc07g008540	up	1.54022	4.29458	62.4351	2.75371e-15	5.30941e-13	4.27671	4.02824	3.62547	5.06202	4.97477	4.92159	3.71375	3.27337	3.32851	3.9768	4.98613	3.43854
	Solyc07g008545	up	3.58581	1.69088	50.3645	1.27684e-12	1.83942e-10	-0.0242524	0.122289	-0.608321	3.15604	3.15797	2.51217	0.453774	-1.21662	-1.72541	-0.170095	2.94206	-0.82942
	Solyc07g008560	up	1.22059	5.81218	25.3458	4.79207e-07	3.0184e-05	5.8931	6.10248	5.3243	6.46918	6.48849	5.8402	5.28478	5.12509	4.77216	5.77329	6.26596	5.06068
	Solyc07g008570	up	1.17612	9.33996	27.4139	1.64243e-07	1.11218e-05	9.30714	9.63778	8.76609	9.94812	10.0023	9.52363	8.82459	8.72457	8.41126	9.237	9.82469	8.65348
	Solyc07g008620	up	2.47516	-0.847078	14.5331	0.000137718	0.00427857	-1.31137	-0.544656	-1.71094	-0.184621	0.00540131	-0.694228	-2.51409	-1.89231	-3.09034	-1.18899	-0.291149	-2.49891
	Solyc07g009500	up	7.61388	7.33356	84.5972	3.65778e-20	1.11311e-17	7.94572	7.37531	8.39562	5.81267	7.63038	8.79261	-0.266595	1.16713	-0.711361	7.90555	7.41189	0.0630586
	Solyc07g009530	up	3.98876	0.720574	16.6321	4.53759e-05	0.00166585	0.471606	-0.960753	1.86854	-0.483877	1.92414	1.75415	-4.16498	-2.21111	-1.45768	0.459798	1.0648	-2.61126
	Solyc07g014680	up	2.32446	1.12193	17.9682	2.2463e-05	0.00089632	1.95415	1.19453	1.35213	1.20688	0.563405	2.23964	-0.9078	-1.41047	-0.121745	1.50027	1.33664	-0.813339
	Solyc07g018393	down	-2.69399	-1.60402	8.90828	0.0028388	0.0474537	-2.12442	-1.54784	-1.9685	-4.16498	-2.22602	-4.16498	-0.490119	-1.63137	-1.72541	-1.88025	-3.51866	-1.2823
	Solyc07g019650	up	1.49736	3.77791	87.0721	1.04638e-20	3.4324e-18	3.70239	3.93411	3.76979	4.42626	4.25546	4.25257	2.83892	2.82893	2.79958	3.8021	4.31143	2.82248
	Solyc07g022900	up	1.45388	5.90443	66.0151	4.47485e-16	9.66032e-14	5.92111	6.00151	5.941	6.70129	6.37322	6.15128	5.23645	4.77896	4.86603	5.95454	6.4086	4.96048
	Solyc07g025140	up	4.97512	-1.33666	27.626	1.47185e-07	1.00748e-05	-4.16498	-4.16498	-4.16498	-0.184621	-0.779879	0.239194	-4.16498	-4.16498	-3.09034	-4.16498	-0.241769	-3.80677
	Solyc07g038160	up	5.89144	1.6846	148.792	3.18436e-34	2.87252e-31	2.15495	1.77981	2.26313	2.25725	2.22972	2.50556	-2.51409	-2.62095	-4.16498	2.06596	2.33084	-3.10001
	Solyc07g041720	up	3.06803	1.11569	24.3064	8.21674e-07	4.82648e-05	1.58827	1.19453	1.38008	1.74514	1.30942	1.95581	0.0147099	-3.19557	-2.48133	1.38763	1.67013	-1.8874
	Solyc07g042100	up	2.9844	1.69201	42.4599	7.21475e-11	8.59576e-09	2.58878	2.04295	1.51225	2.7331	1.88353	1.7299	-0.9078	-0.761662	-0.445998	2.04799	2.11551	-0.705153
	Solyc07g043230	up	2.66528	2.45895	26.9666	2.07006e-07	1.36928e-05	1.97553	2.45812	1.78737	2.36887	3.99649	3.29034	-0.61637	0.819481	1.36964	2.07368	3.21857	0.524252
	Solyc07g043390	up	3.21632	8.19537	30.1844	3.92854e-08	2.93571e-06	8.40805	8.01528	6.41035	9.40725	9.15431	9.00922	6.73936	4.29298	5.98892	7.61123	9.19026	5.67375
	Solyc07g043420	up	1.40624	9.80192	15.5019	8.24216e-05	0.00276468	10.1413	9.93269	8.64547	10.6479	10.2845	10.1805	9.38247	8.33689	9.03098	9.57316	10.371	8.91678
	Solyc07g043460	up	2.47875	6.06569	38.4158	5.71676e-10	5.89363e-08	5.95758	5.98074	4.47122	7.18701	6.82186	6.98445	5.01495	3.73921	4.56147	5.46984	6.99777	4.43854
	Solyc07g043480	up	1.36169	2.09458	10.514	0.00118475	0.0246698	2.05804	1.68023	1.46083	2.84764	2.64857	2.69285	1.5456	-0.0533951	2.00086	1.73303	2.72969	1.16436
	Solyc07g043490	up	2.0719	4.82442	20.89	4.86424e-06	0.000232251	5.06618	4.8875	3.34258	5.94851	5.13471	5.62717	4.00393	2.54194	3.70789	4.43209	5.57013	3.41792
	Solyc07g043500	up	1.14742	5.47318	20.0975	7.35939e-06	0.000333125	5.50386	5.4107	4.66827	6.24244	5.89011	5.95205	5.21807	4.37325	4.95763	5.19428	6.0282	4.84965
	Solyc07g044860	up	1.15617	10.4865	38.6961	4.95192e-10	5.18986e-08	10.4251	10.6369	10.4441	11.2083	10.9539	10.6008	10.07	9.6033	9.63649	10.5021	10.921	9.76994
	Solyc07g047850	up	3.00522	10.2641	194.636	3.09424e-44	4.59731e-41	9.58274	9.55698	9.56606	11.6935	11.2714	10.9881	8.67173	8.11887	8.16854	9.56859	11.3177	8.31971
	Solyc07g049550	down	-1.34288	3.61722	28.4198	9.76594e-08	6.9484e-06	3.59594	3.33609	2.75728	2.68464	3.14026	2.9559	4.19362	4.57246	4.0013	3.22977	2.92693	4.25579
	Solyc07g049600	up	2.65109	-0.875325	14.8673	0.000115348	0.0037114	-2.54391	-2.13598	-3.2421	0.274451	-0.433591	0.37049	-1.76429	-4.16498	-1.72541	-2.64066	0.0704499	-2.55156
	Solyc07g052070	up	3.04524	-0.274984	32.2507	1.35505e-08	1.08653e-06	-3.13782	-2.13598	-2.68379	1.27397	0.709956	0.601895	-2.09102	-1.63137	-2.05442	-2.65253	0.861941	-1.9256
	Solyc07g052250	up	4.18367	-0.613446	15.5653	7.97055e-05	0.00268785	-1.79983	-0.0412223	0.143454	-0.184621	-1.90826	0.601895	-3.11525	-4.16498	-3.09034	-0.565866	-0.496994	-3.45686
	Solyc07g052460	down	-1.67958	3.28673	14.199	0.000164458	0.0049451	2.54654	2.47307	3.55978	1.54238	3.09476	1.95581	3.33314	4.30082	4.25164	2.85979	2.19765	3.96187
	Solyc07g052510	up	2.3491	2.62643	21.3676	3.79119e-06	0.000186662	4.1823	3.65474	2.81716	2.69688	1.42712	2.37089	0.684201	-1.0499	-0.221944	3.5514	2.16497	-0.19588
	Solyc07g052610	up	1.01659	4.5771	32.9534	9.43957e-09	7.66639e-07	4.69673	4.59798	4.77424	5.06439	4.73335	4.97045	3.85988	3.6	4.22331	4.68965	4.92273	3.8944
	Solyc07g054210	up	1.00401	7.11501	36.4944	1.53102e-09	1.4011e-07	7.05059	7.02392	7.15149	7.73501	7.58115	7.29764	6.80929	6.47625	6.3047	7.07533	7.53793	6.53008
	Solyc07g054290	up	1.31723	5.76209	59.7408	1.08213e-14	1.96635e-12	5.65338	5.80886	5.70034	6.59474	6.12108	6.10367	5.15619	4.9281	4.82268	5.72086	6.27316	4.96899
	Solyc07g055050	up	1.1276	5.6031	37.4382	9.43548e-10	9.2016e-08	5.41638	5.60991	5.27262	6.41205	6.0619	5.86705	5.24604	4.92049	4.81321	5.43297	6.11367	4.99325
	Solyc07g056540	up	1.49054	8.94382	58.9201	1.64208e-14	2.84079e-12	8.91408	8.79971	9.45617	9.54222	9.57112	9.12766	8.01267	7.84125	7.95213	9.05665	9.41367	7.93535
	Solyc07g061800	up	2.39712	4.22651	10.9344	0.00094397	0.0206789	1.79486	4.31224	2.41945	4.6445	6.05689	4.6552	3.50975	0.984334	3.15958	2.84218	5.11886	2.55122
	Solyc07g063600	up	3.33684	8.50455	158.561	2.33385e-36	2.35794e-33	8.09907	8.20999	7.57396	9.87672	9.44567	9.33033	6.63375	6.16554	5.77651	7.96101	9.55091	6.19193
	Solyc07g063690	down	-1.79509	2.05355	13.6119	0.00022476	0.00639302	2.51767	2.78013	0.725887	1.1	0.755675	0.431913	2.88625	2.59391	2.06605	2.00789	0.76253	2.51541
	Solyc07g063780	up	2.44777	-1.42952	11.5758	0.000668139	0.0155395	-1.53502	-2.13598	-1.71094	-0.72459	-1.23645	-0.983986	-2.51409	-4.16498	-2.48133	-1.79398	-0.981676	-3.05347
	Solyc07g063850	up	3.48188	-0.244211	16.8772	3.98782e-05	0.00148175	0.208131	-0.960753	0.268353	-1.1833	0.280266	1.01705	-2.51409	-4.16498	-2.05442	-0.161423	0.0380035	-2.91116
	Solyc07g064100	up	1.22084	1.28234	12.5859	0.000388658	0.0100375	1.3159	1.15798	1.10658	2.06227	1.18127	1.86002	0.387947	0.377411	0.852619	1.19349	1.70118	0.539326
	Solyc07g064410	up	1.25831	0.949417	10.8101	0.00100949	0.0218302	0.745005	0.779176	1.07273	0.943946	1.58741	1.57515	0.0974822	-0.414965	0.67573	0.865635	1.36884	0.119416
	Solyc07g065160	up	1.11571	1.67326	9.52196	0.00203028	0.03716	1.61577	2.31606	1.43441	2.2237	1.75436	1.93475	0.250012	1.0602	1.18633	1.78875	1.97094	0.83218
	Solyc07g065900	up	4.64863	5.69323	218.424	1.9957e-49	4.20061e-46	3.84864	4.06818	5.03078	7.03021	7.16034	6.8031	2.53183	2.28166	2.28265	4.31587	6.99788	2.36538
	Solyc07g066150	up	2.05419	8.60506	80.6186	2.7377e-19	7.59877e-17	8.36257	8.42423	8.25733	9.78264	9.30911	9.02213	7.72682	7.21574	7.01833	8.34804	9.37129	7.3203
	Solyc07g150105	up	3.04358	-0.263239	12.7595	0.000354202	0.00927092	0.974755	0.440955	-0.984982	0.494533	-0.654984	-0.568604	-1.76429	-3.19557	-4.16498	0.143576	-0.243018	-3.04161
	Solyc07g150116	up	4.62339	-2.29046	9.22269	0.00239034	0.0420733	-2.54391	-2.13598	-3.2421	-3.17542	-2.63415	-1.34695	-4.16498	-4.16498	-4.16498	-2.64066	-2.38551	-4.16498
	Solyc08g005010	up	1.47014	6.02202	59.0127	1.56659e-14	2.72889e-12	6.01163	5.60337	6.09754	6.69296	6.6543	6.51634	5.49494	4.94836	4.94902	5.90418	6.6212	5.13077
	Solyc08g005510	up	1.93497	0.4601	14.5335	0.000137692	0.00427857	-0.114459	-0.960753	0.00670807	1.17213	1.86279	0.490827	-0.266595	-0.521534	-1.03679	-0.356168	1.17525	-0.608306
	Solyc08g006257	down	-4.55253	-2.47531	8.97023	0.00274413	0.0462653	-4.16498	-3.14558	-2.68379	-4.16498	-4.16498	-4.16498	-1.49806	-3.19557	-2.48133	-3.33145	-4.16498	-2.39166
	Solyc08g006483	down	-2.32608	0.063296	17.3253	3.14964e-05	0.00120172	-0.656533	0.119478	-1.71094	-0.72459	-2.22602	-1.15408	0.974346	0.862494	0.976293	-0.749332	-1.36823	0.937711
	Solyc08g006540	up	1.10027	4.50394	37.5733	8.80423e-10	8.68661e-08	4.38456	4.41648	4.33147	5.31194	4.86765	4.77225	4.10742	3.70417	3.88091	4.3775	4.98395	3.8975
	Solyc08g006930	up	1.19782	8.64807	36.276	1.71264e-09	1.55604e-07	8.5306	8.81986	8.30951	9.46837	9.1131	8.84118	8.19897	7.78731	7.87943	8.55332	9.14088	7.95524
	Solyc08g007040	up	1.72663	5.71192	93.9106	3.30106e-22	1.20838e-19	5.56865	5.7879	5.38571	6.59871	6.27623	6.25322	4.87514	4.40269	4.66679	5.58075	6.37605	4.64821
	Solyc08g007250	up	2.37376	2.16331	96.856	7.45555e-23	2.85322e-20	1.53165	1.57326	1.5619	3.06213	3.09341	3.15117	0.883963	0.862494	0.498155	1.5556	3.10224	0.748204
	Solyc08g013670	up	1.63961	8.08763	102.025	5.48383e-24	2.30851e-21	7.83269	7.99885	8.00494	8.97779	8.7126	8.52538	7.32877	7.06264	6.91129	7.94549	8.73859	7.1009
	Solyc08g013690	down	-2.33367	-0.786504	11.2376	0.000801567	0.0181091	-2.12442	-4.16498	-2.68379	-1.59746	-1.96943	-2.15563	-0.490361	0.958556	-0.286018	-2.99106	-1.90751	0.0607259
	Solyc08g013700	down	-5.01121	-0.691674	39.8683	2.71683e-10	3.00972e-08	-4.16498	-4.16498	-4.16498	-3.17542	-3.06524	-4.16498	0.573005	1.08423	0.11057	-4.16498	-3.46855	0.589269
	Solyc08g014010	up	3.26569	-1.09649	11.6156	0.000654015	0.0152813	-2.12442	-1.54784	-0.504298	-1.8598	0.14937	-0.694228	-4.16498	-2.62095	-3.09034	-1.39219	-0.801551	-3.29209
	Solyc08g021820	up	1.58081	4.20968	46.4479	9.40859e-12	1.23772e-09	4.77748	4.32959	4.40474	4.12788	4.67208	4.89729	3.14163	3.15726	2.73423	4.50394	4.56575	3.01104
	Solyc08g044510	up	2.56453	1.77428	25.7988	3.78931e-07	2.44159e-05	2.54654	2.55968	2.08778	1.79168	1.30948	2.61554	0.387947	-1.41047	-1.03679	2.398	1.90557	-0.686438
	Solyc08g065190	up	1.16467	6.13602	22.5327	2.06593e-06	0.000111261	6.17181	6.47623	6.68143	6.01129	6.69338	6.43898	4.87221	5.05187	5.6809	6.44315	6.38122	5.20166
	Solyc08g066500	up	1.00478	3.81629	13.112	0.000293415	0.00798608	4.23298	4.49917	4.12399	3.70289	3.52161	4.35126	2.32401	3.00241	3.23711	4.28538	3.85859	2.85451
	Solyc08g066610	up	1.3658	0.998698	15.1525	9.91662e-05	0.00325714	0.587253	0.872365	0.268353	1.7686	1.53593	1.54767	0.736794	-0.222882	0.221247	0.57599	1.6174	0.245053
	Solyc08g067320	up	3.21174	2.16585	63.6117	1.51528e-15	3.08652e-13	1.6549	2.24174	1.32432	3.06495	2.63636	3.56619	-0.073102	0.419555	-0.572587	1.74032	3.08917	-0.0753779
	Solyc08g067330	up	2.47768	2.18659	66.942	2.79609e-16	6.24987e-14	1.8777	1.85861	1.35213	2.94094	2.81979	3.46461	0.629618	0.729407	0.618933	1.69615	3.07511	0.659319
	Solyc08g067370	up	1.6369	3.48544	13.7381	0.00021015	0.00603863	3.28941	3.28272	4.37726	3.02366	3.60516	4.63629	2.21701	1.84021	2.67973	3.6498	3.75503	2.24565
	Solyc08g068230	up	1.6383	2.05606	24.662	6.83178e-07	4.1085e-05	2.13608	1.75555	2.26313	2.75675	2.69624	2.32306	1.5456	0.360767	0.833825	2.05159	2.59202	0.913397
	Solyc08g068850	down	-2.37393	-1.20602	8.96062	0.00275861	0.0463135	-2.54391	-0.960753	-0.724712	-4.16498	-2.63415	-2.15563	-1.2734	-0.636608	-0.711361	-1.40979	-2.98492	-0.873789
	Solyc08g069010	up	1.26875	4.2667	56.0559	7.04398e-14	1.14049e-11	4.4433	4.08774	4.3062	4.9613	4.68156	4.56854	3.56897	3.34336	3.52678	4.27908	4.73713	3.4797
	Solyc08g074682	up	5.92898	-1.72259	11.694	0.000627012	0.0147185	-2.54391	-1.81214	-2.68379	0.0630985	-1.64801	-4.16498	-4.16498	-4.16498	-4.16498	-2.34661	-1.91663	-4.16498
	Solyc08g075430	up	1.25456	4.67403	28.1773	1.10695e-07	7.8099e-06	5.19713	4.95563	5.2446	4.56565	4.50478	5.3433	3.34165	3.81781	3.61656	5.13246	4.80458	3.59201
	Solyc08g075540	up	1.12957	1.97513	11.1662	0.000832989	0.0187185	0.887195	1.39629	1.35213	2.69688	3.02971	2.11409	0.974346	1.84021	1.6784	1.21187	2.61356	1.49765
	Solyc08g076220	up	1.07888	9.23406	39.7119	2.94331e-10	3.24639e-08	9.11002	9.21105	9.29532	9.94885	9.64074	9.42531	8.86305	8.41116	8.51299	9.20546	9.67163	8.59573
	Solyc08g076290	up	2.06106	6.1869	83.9396	5.10112e-20	1.51581e-17	6.04488	5.78934	5.97462	7.31647	6.83546	6.72874	5.31239	4.54481	4.81005	5.93628	6.96022	4.88908
	Solyc08g076830	up	1.5541	0.520939	10.6831	0.0010812	0.0230261	0.841338	-0.0412223	0.810487	0.943946	0.456721	1.30662	-1.07905	0.0244231	-0.864919	0.536867	0.902428	-0.639848
	Solyc08g076980	down	-4.28332	-0.108057	29.3132	6.15751e-08	4.48203e-06	-1.53502	-3.14558	-2.68379	-1.8598	-2.63415	-4.16498	1.9086	0.904261	0.366335	-2.4548	-2.88631	1.05973
	Solyc08g077170	up	1.75918	2.40425	38.791	4.71689e-10	5.02697e-08	2.85421	2.92855	2.56049	2.42899	2.79807	2.97666	1.17826	0.5304	1.26247	2.78108	2.73457	0.990377
	Solyc08g077210	up	1.92014	2.48148	27.594	1.49643e-07	1.02154e-05	2.41183	2.87326	2.59667	2.7331	2.30929	3.6803	1.25238	1.0602	1.06401	2.62725	2.90756	1.12553
	Solyc08g077330	down	-3.78458	-1.16549	13.0661	0.000300693	0.00814903	-0.656533	-3.14558	-0.848986	-4.16498	-3.20539	-3.15874	-1.76429	-0.0533951	-0.572587	-1.55037	-3.5097	-0.796757
	Solyc08g078950	up	1.13788	1.81181	10.0632	0.00151259	0.0296623	2.22804	2.12098	1.32363	1.7686	2.54822	2.03712	1.3901	0.862494	0.783028	1.89088	2.11798	1.01187
	Solyc08g079060	up	1.77014	1.03426	18.2339	1.95369e-05	0.000792075	0.587253	1.04242	0.540172	2.00417	1.39858	1.68454	-0.073102	-0.898593	0.618933	0.723282	1.69576	-0.117587
	Solyc08g079200	up	5.92917	-1.18368	16.2812	5.46018e-05	0.00194518	0.345875	-1.13121	-2.68379	-1.1833	-0.91662	-1.15408	-4.16498	-4.16498	-4.16498	-1.15637	-1.08467	-4.16498
	Solyc08g079240	up	1.40437	6.12483	73.5153	9.98579e-18	2.44875e-15	6.01292	6.14965	6.16839	6.8258	6.72153	6.42111	5.34207	4.9876	5.42544	6.11032	6.65614	5.2517
	Solyc08g079430	down	-1.41122	5.66277	39.449	3.36736e-10	3.66607e-08	4.7121	5.08957	5.21644	4.89644	5.44845	4.61266	6.61979	6.23572	6.43586	5.00604	4.98585	6.43045
	Solyc08g079590	up	2.27235	0.316717	11.8816	0.000566904	0.0134702	1.01662	1.04242	-0.848986	1.20688	0.0791806	0.654379	-1.76429	-0.761662	-2.05442	0.403352	0.646813	-1.52679
	Solyc08g079760	up	1.20555	2.93937	25.8124	3.76261e-07	2.43598e-05	3.45842	3.31628	3.06974	3.28178	2.83048	3.37878	2.19838	1.94398	1.78551	3.28148	3.16368	1.97595
	Solyc08g079880	up	5.66338	-1.4301	12.036	0.000521828	0.0126612	-0.0268016	-4.16498	-1.30277	-0.861902	-1.64801	-1.56964	-4.16498	-4.16498	-4.16498	-1.83152	-1.35985	-4.16498
	Solyc08g079890	up	2.50355	0.171333	12.8474	0.000337951	0.00892884	1.24511	-0.0412223	-0.504298	0.399902	1.00319	0.37049	-2.51409	-2.62095	-0.711361	0.233196	0.591193	-1.9488
	Solyc08g080050	up	1.08508	6.92655	52.0241	5.4824e-13	8.19375e-11	6.67539	6.77064	6.96053	7.53307	7.45134	7.27634	6.54931	6.15368	6.28815	6.80218	7.42025	6.33038
	Solyc08g080590	up	2.89839	0.00117873	9.98694	0.00157654	0.030467	-0.656533	0.515888	0.681651	-1.37557	0.563405	1.13255	-4.16498	-1.0499	-3.09034	0.180335	0.106795	-2.76841
	Solyc08g080630	up	4.20644	1.04143	21.4476	3.63622e-06	0.000180439	0.841338	0.67955	2.99036	-0.277642	1.24677	1.40179	-4.16498	-2.21111	-2.48133	1.50375	0.790306	-2.95247
	Solyc08g080640	up	5.474	4.00268	42.6178	6.65524e-11	8.04297e-09	3.92752	3.43559	5.73987	2.60867	4.62027	4.9769	-2.51409	-0.414965	-0.711361	4.36766	4.06861	-1.21347
	Solyc08g080650	up	2.2532	7.02646	18.3057	1.88139e-05	0.000765222	7.29278	7.31181	8.22408	5.93949	7.15744	8.0048	3.83329	5.11757	5.58019	7.60956	7.03391	4.84368
	Solyc08g080660	up	8.17186	0.782506	27.2697	1.76967e-07	1.19196e-05	0.278646	0.779176	2.43286	-2.59396	1.39858	1.75415	-4.16498	-4.16498	-4.16498	1.16356	0.186259	-4.16498
	Solyc08g080670	up	6.64699	-0.681645	15.5776	7.91853e-05	0.00267746	-1.53502	-2.55421	1.00254	-2.59396	-0.0714768	0.168775	-4.16498	-4.16498	-4.16498	-1.0289	-0.832219	-4.16498
	Solyc08g081470	up	3.29853	-0.0649254	24.1014	9.13923e-07	5.30664e-05	-2.54391	0.0413643	-0.724712	1.1	0.613928	0.891485	-2.09102	-2.62095	-1.72541	-1.07575	0.868472	-2.14579
	Solyc08g081620	up	5.68306	1.07922	44.6984	2.29843e-11	2.94689e-09	2.77104	1.39629	0.636016	1.20688	1.27844	1.30662	-2.51409	-4.16498	-4.16498	1.60112	1.26398	-3.61468
	Solyc08g082120	up	1.59631	5.25967	41.5855	1.12826e-10	1.32547e-08	5.99566	5.74388	5.08463	5.58955	5.41136	5.75945	4.31624	3.62533	3.98009	5.60806	5.58679	3.97389
	Solyc08g082130	up	2.55487	2.82126	72.7297	1.4868e-17	3.61092e-15	3.08816	3.32455	2.86739	3.0996	3.09341	3.86423	0.976797	0.862494	0.783028	3.09337	3.35241	0.874106
	Solyc08g082590	up	1.18571	3.85043	31.1765	2.35597e-08	1.81979e-06	3.53964	3.79226	4.09476	4.11334	4.31265	4.51986	2.87457	3.41012	3.08815	3.80889	4.31528	3.12428
	Solyc08g082670	up	2.22127	0.833016	15.9413	6.53381e-05	0.00227943	1.28245	2.02816	0.258689	1.23419	0.722535	1.22783	-0.463173	-1.59507	-1.23173	1.18977	1.06152	-1.09666
	Solyc08g083360	up	3.80554	5.47946	331.708	4.08204e-74	2.06209e-70	4.57171	4.93422	4.73202	6.79851	6.56065	6.53308	3.14163	2.35879	2.92202	4.74598	6.63075	2.80748
	Solyc09g005090	up	2.10099	-0.506933	15.9299	6.57335e-05	0.00229006	-3.13782	-1.32453	-1.9685	0.458761	0.662789	0.0167033	-1.49806	-1.63137	-1.45768	-2.14362	0.379418	-1.52904
	Solyc09g005560	up	4.75767	-2.38136	10.9739	0.000924047	0.0203312	-2.54391	-3.14558	-4.16498	-1.8598	-1.90826	-2.57171	-4.16498	-4.16498	-4.16498	-3.28482	-2.11325	-4.16498
	Solyc09g005610	up	1.02658	2.34587	9.20934	0.00240784	0.0423009	2.88843	1.87296	2.86739	2.45813	2.35382	2.86974	1.25238	1.38917	1.95571	2.54293	2.56056	1.53242
	Solyc09g006005	up	4.41924	2.99413	18.6412	1.57774e-05	0.000656315	1.72081	-0.808326	4.3062	2.53446	3.99917	4.52762	-1.07905	-0.0533951	-0.329626	1.73956	3.68708	-0.487357
	Solyc09g007010	up	4.26138	4.05727	16.9529	3.83188e-05	0.00143174	2.78322	0.119478	5.5685	3.80273	4.98785	5.42261	-0.374032	1.09668	0.882894	2.82373	4.73773	0.535181
	Solyc09g008370	down	-1.45207	1.13205	13.868	0.000196107	0.00572632	0.345875	-0.222093	0.890399	0.207383	0.280266	0.84708	1.57478	2.26573	1.73295	0.33806	0.444909	1.85782
	Solyc09g008420	up	7.90268	-0.572231	60.7185	6.58492e-15	1.20523e-12	-4.16498	-4.16498	-4.16498	0.622169	0.563405	1.09507	-4.16498	-4.16498	-4.16498	-4.16498	0.760214	-4.16498
	Solyc09g010080	down	-1.09472	2.31347	13.3261	0.000261733	0.00725669	2.24575	1.65422	1.82853	2.15417	1.5619	1.6546	3.26315	2.85046	2.47094	1.9095	1.79022	2.86152
	Solyc09g010480	down	-1.16515	1.66278	10.565	0.00115251	0.024198	2.13069	1.45772	1.43441	1.45834	0.400267	0.705021	1.95373	1.92381	2.30082	1.67428	0.854542	2.05946
	Solyc09g010850	up	1.02089	2.47209	14.5713	0.000134952	0.00421338	2.48821	2.31606	2.75448	2.50077	2.88806	3.05684	1.42257	2.09589	1.86092	2.51958	2.81522	1.79313
	Solyc09g011810	up	1.08242	6.58337	27.6363	1.46404e-07	1.00486e-05	6.43375	6.67524	6.66022	7.35564	6.97834	6.62964	6.23426	5.80695	5.71348	6.58974	6.98787	5.91823
	Solyc09g014520	up	1.35623	9.78122	56.7731	4.891e-14	8.0743e-12	9.67299	9.59326	9.61031	10.643	10.3619	10.0697	9.30925	8.88784	8.81506	9.62552	10.3582	9.00405
	Solyc09g014610	up	3.4174	-2.20554	8.80424	0.00300531	0.0497758	-3.13782	-4.16498	-4.16498	-1.37557	-2.63415	-1.15408	-3.11525	-4.16498	-4.16498	-3.82259	-1.72127	-3.81507
	Solyc09g018890	up	2.84737	2.42822	127.752	1.27153e-29	8.02905e-27	1.01662	1.39629	1.46083	3.66114	3.39009	3.60896	0.572889	0.862494	0.783028	1.29124	3.5534	0.73947
	Solyc09g055500	down	-3.091	-1.32456	11.896	0.000562556	0.0133921	-3.13782	-1.54784	-2.68379	-2.59396	-3.20539	-3.15874	0.0147099	-1.89231	-0.121745	-2.45648	-2.98603	-0.66645
	Solyc09g056175	up	5.11987	-1.33586	13.4401	0.000246298	0.00688164	0.0558336	-0.808326	-1.30277	-2.18067	-1.23645	-2.15563	-4.16498	-4.16498	-4.16498	-0.685088	-1.85759	-4.16498
	Solyc09g059430	down	-2.10886	1.22094	16.3152	5.36331e-05	0.00191337	-0.947111	0.193579	0.58889	-0.72459	0.613928	0.306335	1.32288	2.40317	2.65169	-0.0548806	0.0652243	2.12592
	Solyc09g060100	up	1.37205	3.65129	43.5624	4.10658e-11	5.1862e-09	3.1269	3.2996	3.17719	4.61177	4.15417	4.23975	3.28097	2.93349	2.66578	3.20123	4.33523	2.96008
	Solyc09g061633	up	2.09046	0.802339	9.0085	0.00268727	0.0454014	1.77059	1.93918	0.540172	1.45834	-0.654984	0.84708	-0.374032	-1.41047	-2.48133	1.41665	0.550145	-1.42195
	Solyc09g061637	up	2.19705	1.63344	9.28556	0.00230967	0.0410828	2.47326	2.75352	1.6099	2.52735	0.787189	1.20472	0.572889	-0.636608	-3.09034	2.2789	1.50642	-1.05135
	Solyc09g063130	up	1.90829	8.01757	137.368	1.0017e-31	7.44142e-29	7.64675	7.80185	7.83617	9.00516	8.73174	8.59669	7.09142	6.87321	6.64054	7.76159	8.77787	6.86839
	Solyc09g063150	down	-1.22736	3.71654	36.7172	1.36572e-09	1.27289e-07	3.21944	3.37319	3.39832	2.7331	3.50832	3.04705	4.30303	4.3432	4.41902	3.33031	3.09616	4.35508
	Solyc09g065180	up	1.09728	7.0303	27.2328	1.80372e-07	1.20844e-05	7.0961	7.04409	7.20059	7.75619	7.38991	7.06496	6.69265	6.04001	6.18774	7.11359	7.40369	6.3068
	Solyc09g065740	up	2.41392	-0.200998	14.0368	0.000179266	0.00532069	-1.31137	-2.13598	-0.724712	1.06254	0.613928	0.431913	-0.61637	-3.19557	-1.72541	-1.39069	0.702795	-1.84579
	Solyc09g072690	up	2.32392	-0.270053	8.83803	0.00295017	0.0489494	0.345875	0.67955	-0.984982	0.33854	0.280266	-1.34695	-1.2734	-2.62095	-3.09034	0.0134808	-0.242715	-2.32823
	Solyc09g074430	down	-1.1551	4.32663	49.948	1.57877e-12	2.24026e-10	4.0076	4.29923	4.21215	3.86942	3.77573	3.42483	4.89263	4.71876	4.94613	4.17299	3.69	4.85251
	Solyc09g074610	up	1.09433	3.38211	20.362	6.40909e-06	0.000295943	2.94373	3.1862	3.7269	3.87484	3.61861	4.00046	2.88625	2.47422	2.8621	3.28561	3.8313	2.74086
	Solyc09g075020	up	2.11568	4.22779	57.5632	3.27285e-14	5.51104e-12	4.72478	4.0027	4.89829	4.26535	4.59243	5.09774	2.47096	2.54194	2.73423	4.54192	4.65184	2.58238
	Solyc09g075970	up	2.46848	2.65563	31.1187	2.42722e-08	1.86911e-06	3.63048	4.14955	3.21648	2.0238	1.33976	2.90266	-0.166607	-0.135651	-0.221944	3.6655	2.08874	-0.174734
	Solyc09g082460	up	4.10391	-0.0585883	13.8999	0.000192807	0.00564957	0.745005	-0.32181	0.725887	-2.59396	0.341514	1.09507	-4.16498	-4.16498	-2.05442	0.383027	-0.385791	-3.46146
	Solyc09g082760	up	1.82308	3.60769	9.87972	0.0016711	0.0320005	5.1485	4.26146	2.65503	3.62794	3.6782	3.63531	2.45535	2.00283	0.295614	4.02166	3.64715	1.5846
	Solyc09g083290	up	4.4818	-0.28642	12.5927	0.000387248	0.0100216	0.887195	1.19453	-0.6103	-2.18067	-2.22602	0.54743	-4.16498	-3.19557	-4.16498	0.490475	-1.28642	-3.84184
	Solyc09g083435	up	2.28169	3.57959	36.6143	1.43971e-09	1.32716e-07	3.09794	2.9818	1.67902	4.68999	4.69604	4.36313	1.52382	2.54194	2.65169	2.58625	4.58305	2.23915
	Solyc09g084460	up	2.10856	2.54237	17.6202	2.69707e-05	0.00104966	2.47326	1.98153	1.48677	3.47238	3.32334	3.44732	1.17826	-0.414965	2.18821	1.98052	3.41434	0.983833
	Solyc09g084470	up	5.55226	5.99184	164.787	1.01807e-37	1.16884e-34	1.0573	1.23018	1.172	7.57771	7.67398	7.30381	2.78999	0.682169	1.78551	1.15316	7.5185	1.75255
	Solyc09g089530	down	-4.10531	-1.35126	10.6439	0.00110436	0.0233621	-2.54391	-4.16498	-2.28226	-4.16498	-3.20539	-3.15874	-3.11525	-0.222882	0.498155	-2.99705	-3.5097	-0.946659
	Solyc09g089930	up	5.66701	-1.72565	10.9212	0.000950708	0.0208085	-2.12442	-4.16498	-0.984982	-3.17542	-1.23645	-0.568604	-4.16498	-4.16498	-4.16498	-2.42479	-1.66016	-4.16498
	Solyc09g090180	up	4.167	2.87297	102.464	4.39287e-24	1.8806e-21	4.04497	3.91233	2.97211	3.03337	2.64857	3.32313	-0.9078	-0.898593	-1.23194	3.64313	3.00169	-1.01278
	Solyc09g090300	up	1.23914	3.01553	28.1075	1.14763e-07	8.05187e-06	3.51056	3.46581	3.57194	3.09032	3.01098	3.315	1.71246	2.33011	1.5627	3.51611	3.13877	1.86842
	Solyc09g090650	up	5.07596	-0.226589	15.4909	8.29029e-05	0.00277714	1.09687	-0.0412223	0.00670807	-2.59396	-1.23645	1.16909	-4.16498	-4.16498	-3.09034	0.354119	-0.887108	-3.80677
	Solyc09g090730	up	4.55111	0.661754	87.4017	8.85723e-21	2.98288e-18	-0.794518	-1.54784	-0.984982	1.98085	2.11162	1.70523	-1.76429	-2.62095	-2.48133	-1.10911	1.93257	-2.28886
	Solyc09g091140	down	-2.737	-1.44566	13.2452	0.000273274	0.00753533	-1.79983	-1.81214	-2.68379	-2.18067	-4.16498	-3.15874	-0.490119	-1.21895	-0.711361	-2.09859	-3.16813	-0.80681
	Solyc09g091600	up	1.20665	3.81438	15.9996	6.33574e-05	0.00221953	3.84864	4.49184	3.39147	4.25402	3.81405	4.43989	3.33314	2.61921	2.93371	3.91065	4.16932	2.96202
	Solyc09g091700	up	2.4225	0.053401	18.0329	2.17116e-05	0.000870461	-1.31137	-0.128825	-0.6103	1.06254	0.755675	0.891485	-0.61637	-3.19557	-1.23194	-0.683497	0.903234	-1.68129
	Solyc09g092590	up	2.84573	-1.35924	9.87161	0.00167848	0.0321175	-1.11813	-1.52365	-1.71094	-0.377078	-0.91662	-2.15563	-4.16498	-2.21111	-4.16498	-1.45091	-1.14978	-3.51369
	Solyc09g092620	up	3.832	-0.666843	24.8133	6.31604e-07	3.83487e-05	-0.656533	-0.428935	-1.13515	-0.861902	0.400267	0.0947421	-3.11525	-4.16498	-2.48133	-0.740204	-0.122297	-3.25385
	Solyc09g092640	up	3.07501	-0.585423	20.6257	5.58415e-06	0.000263635	-0.530359	-0.128825	-0.724712	-0.599219	0.400267	-0.346064	-2.09102	-3.19557	-3.09034	-0.461299	-0.181672	-2.79231
	Solyc09g097770	down	-2.00644	1.9044	22.3795	2.23753e-06	0.000119231	1.0573	0.57253	1.53729	1.24082	0.842983	0.37049	2.08123	2.70443	3.42356	1.05571	0.818096	2.73641
	Solyc10g005050	up	1.22124	7.24277	65.9159	4.70576e-16	1.00727e-13	7.11134	7.21684	7.12718	7.94805	7.72484	7.61674	6.7266	6.59237	6.29454	7.15179	7.76321	6.53784
	Solyc10g005110	up	1.25377	6.91784	66.7463	3.0879e-16	6.8416e-14	6.76662	6.88755	6.71197	7.67089	7.46915	7.24067	6.40781	6.12416	6.10074	6.78872	7.46024	6.2109
	Solyc10g006230	up	1.29694	10.2129	53.6792	2.36044e-13	3.65766e-11	9.95991	10.0894	10.0316	11.0963	10.7216	10.5384	9.7777	9.36527	9.33619	10.027	10.7854	9.49305
	Solyc10g006530	up	2.54802	1.34786	63.3995	1.68762e-15	3.41008e-13	1.01662	1.12048	1.07273	2.33785	2.09393	2.07612	0.0147099	-0.636608	-0.329626	1.06994	2.1693	-0.317175
	Solyc10g006900	up	4.31528	6.86105	111.869	3.81646e-26	2.00825e-23	6.05247	5.80425	5.07755	8.6068	7.91501	7.75202	4.48716	3.50818	3.14959	5.64476	8.09128	3.71498
	Solyc10g006970	up	1.08749	4.26357	37.6965	8.26527e-10	8.18683e-08	3.89936	3.72514	4.29523	4.81638	4.93657	4.68664	3.7333	3.60634	3.8504	3.97324	4.8132	3.73001
	Solyc10g007600	down	-1.15591	10.205	18.1464	2.04555e-05	0.000825342	9.98112	9.69044	10.5757	9.32323	10.0626	9.07389	10.7366	10.7041	10.6765	10.0824	9.48658	10.7057
	Solyc10g007690	up	1.33672	9.71865	54.2556	1.76033e-13	2.7789e-11	9.46865	9.65655	9.4854	10.5973	10.2993	9.99908	9.24512	8.87696	8.78312	9.53687	10.2986	8.9684
	Solyc10g007900	up	2.14555	-0.319488	15.391	8.74024e-05	0.00290475	-0.0268016	-0.128644	-0.945177	0.207383	0.0152087	0.295205	-2.47241	-2.16858	-1.0377	-0.366874	0.172599	-1.8929
	Solyc10g008020	up	2.23684	4.81813	210.489	1.0744e-47	1.93836e-44	4.37775	4.17264	4.35982	5.83922	5.69511	5.66444	3.63303	3.22475	3.62379	4.30341	5.73292	3.49386
	Solyc10g008120	up	1.01198	5.08369	12.1954	0.000479067	0.0118556	5.44805	4.89029	5.96773	5.35712	5.48616	4.74529	4.35078	4.43511	3.79379	5.43535	5.19619	4.19323
	Solyc10g008160	up	4.44932	4.78479	160.701	7.95239e-37	8.36922e-34	4.4433	4.06325	4.84664	6.08203	5.73183	5.67564	2.14099	0.729407	0.976293	4.45106	5.82984	1.28223
	Solyc10g008330	up	4.75777	-1.87665	10.8529	0.000986424	0.0214047	-0.947111	-1.81214	-1.9685	-3.17542	-1.64801	-1.83309	-4.16498	-4.16498	-4.16498	-1.57592	-2.21884	-4.16498
	Solyc10g008410	up	1.50042	2.89088	12.3346	0.000444631	0.0111857	2.84401	2.87326	0.850996	3.5146	3.4608	3.84742	1.93134	2.00283	2.40528	2.18942	3.60761	2.11315
	Solyc10g008540	down	-1.03093	1.74558	10.4855	0.00120313	0.0249291	1.37953	1.00175	1.00254	1.85877	0.755675	1.23949	2.2354	2.46029	2.40528	1.12794	1.28465	2.36699
	Solyc10g009365	up	1.48067	1.91341	9.45708	0.00210335	0.0382756	2.54654	2.93936	1.4075	2.63443	1.21439	2.03712	0.929862	0.682169	0.142838	2.2978	1.96198	0.584956
	Solyc10g009570	up	1.03581	6.94306	27.0622	1.97008e-07	1.31641e-05	6.87754	6.96497	6.84438	7.69982	7.29551	7.11521	6.70446	6.05515	6.2284	6.89563	7.37018	6.32934
	Solyc10g011650	down	-5.03762	-2.28273	9.18661	0.00243792	0.0425843	-4.16498	-2.55421	-2.68379	-4.16498	-4.16498	-4.16498	-1.49806	-4.16498	-1.21408	-3.13433	-4.16498	-2.29237
	Solyc10g017970	up	3.85875	5.07089	27.0443	1.98851e-07	1.32522e-05	5.4409	4.0985	6.67815	4.03594	5.88921	5.74827	1.63097	2.31152	-0.0296885	5.40585	5.22447	1.30427
	Solyc10g017980	up	4.0041	4.65312	28.5935	8.92825e-08	6.42478e-06	4.7701	3.87215	6.49955	3.00888	5.40001	5.21165	0.389065	1.47749	0.560894	5.04727	4.54018	0.809148
	Solyc10g018120	up	2.00271	0.145198	10.6944	0.00107461	0.0229245	0.587253	0.193579	0.966116	-0.72459	0.662741	0.601895	-3.11525	-1.21895	-1.03679	0.582316	0.180015	-1.79033
	Solyc10g018640	down	-2.54724	-0.992236	12.1806	0.000482879	0.0119043	-0.947111	-0.960753	-1.49247	-3.17542	-2.22602	-2.57171	0.0147099	-0.222882	-1.72541	-1.13344	-2.65772	-0.644529
	Solyc10g049450	down	-1.92965	-1.10099	9.69241	0.00185031	0.0346519	-1.31137	-2.55421	-1.30277	-2.18067	-2.22602	-2.15563	-0.266595	-1.0499	-0.329626	-1.72278	-2.18744	-0.548706
	Solyc10g050990	down	-1.48124	0.481676	10.6518	0.00109967	0.0233211	0.0558336	1.12048	0.383295	-0.277642	-0.334456	-1.15408	0.736794	1.16699	0.67573	0.51987	-0.588727	0.85984
	Solyc10g051050	up	1.06738	1.90142	9.54412	0.00200591	0.0368744	2.73388	2.19501	1.90747	1.92289	1.82039	2.29027	0.836555	1.41829	0.498155	2.27879	2.01118	0.917668
	Solyc10g054010	up	1.32058	2.69948	9.79538	0.0017495	0.0331749	2.83093	3.10212	3.02259	2.18935	2.46809	3.8247	1.10012	1.81852	2.04465	2.98521	2.82738	1.65443
	Solyc10g054440	up	1.94129	5.3827	26.9658	2.07089e-07	1.36928e-05	5.79221	5.52276	4.41488	6.59814	5.68688	5.6898	3.92113	4.55156	3.76136	5.24328	5.99161	4.07802
	Solyc10g054870	up	1.97835	4.52437	62.2976	2.95291e-15	5.65034e-13	4.09812	4.28283	4.06924	5.74556	5.24901	4.92159	3.74618	2.93349	3.32851	4.15006	5.30539	3.33606
	Solyc10g054900	down	-1.35466	5.51781	56.223	6.4701e-14	1.06118e-11	4.90532	5.06689	4.38763	4.81128	5.11355	4.88087	6.24314	6.24902	6.38727	4.78661	4.93523	6.29314
	Solyc10g055800	up	2.88046	5.25428	42.7178	6.32354e-11	7.67884e-09	5.33357	5.73257	6.44902	4.59219	5.61106	6.11541	2.3411	2.18331	3.30276	5.83838	5.43955	2.60906
	Solyc10g055820	up	4.1213	-0.0756154	23.7113	1.11925e-06	6.38036e-05	-0.207789	-0.428935	1.23457	-0.277642	0.0791806	0.753944	-2.51409	-4.16498	-3.09034	0.199283	0.185161	-3.25647
	Solyc10g074785	down	-4.55539	-2.52426	9.43089	0.0021336	0.0386589	-3.13782	-3.14558	-4.16498	-4.16498	-4.16498	-4.16498	-2.09102	-3.19557	-1.72541	-3.48279	-4.16498	-2.33733
	Solyc10g075110	up	5.76914	6.48621	151.266	9.16965e-35	8.57804e-32	7.72711	7.40392	7.14127	5.72697	6.19397	7.25155	0.0974822	1.38917	0.618933	7.4241	6.39083	0.701863
	Solyc10g075150	up	8.30869	6.71715	146.489	1.01507e-33	8.84091e-31	5.44781	5.11428	5.8602	7.78096	7.96474	8.39773	1.0594	-1.41047	-2.05442	5.4741	8.04781	-0.801831
	Solyc10g075160	up	1.45204	7.46047	100.585	1.1343e-23	4.54763e-21	7.29348	7.39759	7.09373	8.25013	8.10395	7.92091	6.50159	6.72303	6.70388	7.2616	8.09166	6.64283
	Solyc10g076740	down	-1.19942	4.49103	22.8702	1.73321e-06	9.41451e-05	3.19229	2.38093	3.06974	3.89629	4.05252	4.52339	5.00679	5.37777	5.67743	2.88099	4.1574	5.354
	Solyc10g076790	up	1.26062	1.96889	13.9651	0.000186232	0.00548233	2.47326	2.2825	1.48677	2.44363	2.09393	2.4323	1.4854	0.904261	0.783028	2.08084	2.32329	1.05756
	Solyc10g077040	up	2.51624	8.39372	172.789	1.81955e-39	2.29791e-36	7.78861	7.62708	7.98301	9.53374	9.39016	9.20888	7.21934	6.69251	6.61444	7.79957	9.37759	6.8421
	Solyc10g077120	up	1.36691	8.21318	82.7067	9.51762e-20	2.73177e-17	7.99968	7.97346	8.10941	9.04343	8.75508	8.64344	7.61965	7.47016	7.25951	8.02751	8.81398	7.44977
	Solyc10g078370	up	1.48543	1.90929	16.022	6.26123e-05	0.00220259	2.38011	2.55968	2.12129	1.81439	1.5619	2.71927	0.320628	0.729407	0.882894	2.3537	2.03185	0.64431
	Solyc10g078580	up	1.07454	1.47266	11.8339	0.000581635	0.0137519	1.86529	1.36456	1.63332	1.88046	1.4551	1.91337	0.883963	0.819481	0.366335	1.62106	1.74965	0.689926
	Solyc10g078600	up	2.01429	4.77586	120.428	5.09901e-28	2.7998e-25	5.11517	4.99486	4.95282	5.11331	5.0751	5.65963	3.34165	3.2892	3.26514	5.02095	5.28268	3.29867
	Solyc10g079350	up	2.92642	-0.898741	11.0294	0.000896766	0.0198689	-1.31137	-0.960753	-0.144369	-0.861902	-1.64801	0.239194	-3.11525	-2.21111	-4.16498	-0.805496	-0.756904	-3.16378
	Solyc10g079750	up	3.32731	1.65465	48.971	2.59778e-12	3.52768e-10	2.58878	2.68057	1.74501	1.54238	1.66134	2.23964	-2.51409	-0.898593	-1.03679	2.33812	1.81445	-1.48316
	Solyc10g080360	down	-1.3419	1.3514	12.0834	0.00050872	0.0124147	1.56024	1.85023	0.681651	0.207383	0.511049	0.654379	1.81386	1.38917	2.06605	1.36404	0.457604	1.75636
	Solyc10g080920	up	1.74825	2.39571	24.2037	8.66675e-07	5.05554e-05	2.86571	3.07297	2.10463	2.69688	2.32401	3.18724	1.11326	1.32911	0.618933	2.6811	2.73604	1.02043
	Solyc10g080980	down	-1.98093	-0.0663864	16.7306	4.30814e-05	0.00159319	-0.114459	-0.222093	-0.724712	-0.599219	-1.90826	-1.56964	0.513837	0.360767	0.882894	-0.353755	-1.35904	0.585833
	Solyc10g083300	up	3.52858	1.07154	28.132	1.13316e-07	7.97254e-06	-1.11777	0.119478	1.03806	2.47248	2.32378	1.46192	-2.09102	-1.89231	-0.329626	0.0132542	2.08606	-1.43765
	Solyc10g083580	down	-1.01707	3.70517	21.1789	4.18355e-06	0.000204783	3.5468	3.0532	3.8063	3.2065	3.38283	2.96632	4.01797	4.38067	4.20417	3.46877	3.18522	4.20093
	Solyc10g083700	up	2.40068	0.266662	25.0483	5.5913e-07	3.45294e-05	-0.307784	0.181976	-0.724712	1.33808	0.964772	0.934565	-0.754739	-2.21863	-0.890584	-0.283507	1.07914	-1.28798
	Solyc10g083860	up	1.72163	3.69621	41.2488	1.34032e-10	1.55293e-08	3.66997	3.60808	4.58974	4.02845	4.1878	4.06174	2.35798	2.43201	2.354	3.95593	4.09267	2.38133
	Solyc10g084120	down	-3.03702	0.194449	19.2653	1.13757e-05	0.000492844	-1.31137	-0.670476	0.437505	-1.37557	-2.22602	-1.56964	0.387947	0.582784	1.93259	-0.514779	-1.72374	0.967773
	Solyc10g084380	up	1.13428	3.17825	38.2371	6.26494e-10	6.38064e-08	2.87713	2.65457	2.82735	3.85306	3.74206	3.74828	2.42362	2.76236	2.74754	2.78635	3.78113	2.64451
	Solyc10g084590	up	7.57801	-0.802183	39.5441	3.20728e-10	3.52215e-08	-3.13782	-3.14558	-4.16498	1.06254	0.400267	-0.453047	-4.16498	-4.16498	-4.16498	-3.48279	0.336588	-4.16498
	Solyc10g084600	up	5.16049	-0.221969	54.5745	1.49662e-13	2.37745e-11	-1.11777	-0.222093	-0.984982	0.721654	0.511049	0.976932	-3.11525	-3.19557	-4.16498	-0.774949	0.736545	-3.49193
	Solyc10g084840	up	1.55602	0.476434	9.67781	0.00186507	0.034766	1.24511	0.456931	-0.226287	0.768937	1.00319	0.801263	-0.374032	-0.315729	-1.45768	0.491918	0.857796	-0.715814
	Solyc10g085830	up	1.23614	3.85862	31.6945	1.80431e-08	1.40658e-06	3.49591	3.37319	4.11985	4.23619	4.59871	4.36707	3.11208	3.13111	3.28353	3.66298	4.40066	3.17557
	Solyc10g086170	up	1.04592	4.46685	40.2675	2.21468e-10	2.49725e-08	4.56114	4.38915	4.55636	5.03084	4.91054	4.64185	4.0566	3.72762	3.66646	4.50222	4.86108	3.81689
	Solyc10g086180	up	1.35683	5.03109	53.0084	3.32126e-13	5.08414e-11	5.14379	5.08294	4.4317	5.67419	5.63118	5.4985	4.20717	4.21215	4.3245	4.88614	5.60129	4.24794
	Solyc10g086240	up	1.2493	2.43569	15.6538	7.60589e-05	0.00259959	2.05804	2.19501	2.8069	2.6216	3.2613	2.78988	2.08123	1.32911	1.53227	2.35332	2.89093	1.64754
	Solyc10g086250	up	9.78315	1.1211	128.671	8.00441e-30	5.18398e-27	-4.16498	-4.16498	-4.16498	2.08112	2.7537	2.92419	-4.16498	-4.16498	-4.16498	-4.16498	2.58634	-4.16498
	Solyc10g086570	up	1.68554	2.158	12.1929	0.000479706	0.0118556	1.56024	0.730223	2.35049	2.11811	3.5863	2.64177	0.787537	1.58166	1.26247	1.54698	2.78206	1.21056
	Solyc10g086640	up	1.0028	1.68209	9.25252	0.00235172	0.0415673	2.42744	2.44301	1.96397	1.83675	1.18127	1.68014	0.929862	0.476042	0.366335	2.27814	1.56605	0.590746
	Solyc10g086720	up	5.24385	-0.297872	40.5493	1.91715e-10	2.18124e-08	-1.53502	-2.55421	-0.724712	0.859094	0.216302	1.23949	-4.16498	-3.19557	-3.09034	-1.60465	0.771628	-3.48363
	Solyc11g005340	up	1.40863	1.74086	16.5967	4.62309e-05	0.00168743	1.53165	2.08249	1.13966	2.56914	2.30853	1.89167	0.974346	1.09668	0.559808	1.5846	2.25645	0.876945
	Solyc11g005350	up	1.78564	2.14915	15.9638	6.45662e-05	0.00225562	2.85941	1.98153	2.24804	1.74514	2.16342	3.35519	0.572889	0.819481	1.06401	2.36299	2.42125	0.818794
	Solyc11g005480	up	7.25654	-0.305703	23.3646	1.34022e-06	7.48923e-05	-1.11777	-0.222093	0.850996	-2.59396	0.341514	0.934565	-4.16498	-4.16498	-4.16498	-0.162957	-0.439292	-4.16498
	Solyc11g006890	up	1.29849	1.46212	10.2833	0.00134239	0.0272567	1.47271	2.12098	1.72335	1.27397	1.63711	2.07612	0.0147099	1.0602	-0.121745	1.77235	1.6624	0.31772
	Solyc11g007200	up	1.72331	1.91587	14.435	0.000145082	0.004458	2.26325	1.62774	2.41945	1.39946	2.02092	3.11417	0.387947	0.729407	0.833825	2.10348	2.17819	0.650393
	Solyc11g009020	up	1.60249	4.19437	35.1736	3.01586e-09	2.61089e-07	4.21589	4.04335	3.93436	5.22983	4.66915	4.49489	3.69394	2.66852	3.1695	4.06453	4.79796	3.17732
	Solyc11g010790	down	-2.02675	-0.405322	13.6353	0.000221976	0.00633522	-0.485254	-2.1083	-0.724117	-1.55655	-1.20441	-1.95454	0.658259	0.187093	0.076805	-1.10589	-1.57183	0.307385
	Solyc11g011210	up	1.92153	2.94799	36.8604	1.269e-09	1.19154e-07	3.85442	4.17721	3.36988	2.55572	2.57397	3.11417	0.736794	1.26643	0.498155	3.80051	2.74795	0.833793
	Solyc11g011275	up	2.48761	2.13915	25.7046	3.97868e-07	2.54414e-05	3.04667	3.12131	2.05541	2.27571	1.60817	2.86652	-0.606377	0.62681	-0.740347	2.74113	2.25013	-0.239972
	Solyc11g011310	up	2.13397	1.37202	18.6386	1.57985e-05	0.000656315	2.45815	2.45812	1.63332	0.81472	1.00319	1.68014	-0.374032	-2.21111	-0.445998	2.1832	1.16602	-1.01038
	Solyc11g011440	up	1.92351	5.93789	33.3307	7.77448e-09	6.39635e-07	6.95595	6.09762	6.92291	5.29387	5.64204	6.61977	3.97138	4.068	4.09387	6.65883	5.8519	4.04441
	Solyc11g012640	up	1.56	2.73871	31.2604	2.2564e-08	1.74822e-06	2.36399	2.87326	3.14497	3.44352	3.36818	2.83605	1.81386	1.52923	1.73295	2.79407	3.21592	1.69201
	Solyc11g012927	down	-4.70714	-2.5258	9.90588	0.00164751	0.0316207	-4.16498	-4.16498	-3.2421	-4.16498	-4.16498	-4.16498	-3.11525	-2.21111	-1.45768	-3.85735	-4.16498	-2.26135
	Solyc11g013810	up	1.61249	6.66865	102.758	3.78696e-24	1.64916e-21	7.28595	7.18303	7.20151	6.67671	6.78456	7.1172	5.04639	5.30074	5.41088	7.2235	6.85949	5.25267
	Solyc11g020330	up	3.36461	2.26609	17.1236	3.50243e-05	0.00132234	0.41011	1.96046	3.02618	2.11811	3.85138	2.92419	-0.9078	-1.89231	0.930349	1.79891	2.96456	-0.623255
	Solyc11g020955	down	-1.32064	4.45838	30.5763	3.20994e-08	2.4202e-06	3.35615	4.23976	4.38418	3.80283	3.94809	3.6803	5.22269	5.23269	4.91992	3.99337	3.81041	5.1251
	Solyc11g020960	down	-1.06917	5.224	13.8249	0.000200657	0.00581882	5.45099	5.65978	4.3062	4.74484	4.29243	4.66122	5.74996	5.64822	5.53345	5.13899	4.56616	5.64388
	Solyc11g021020	up	6.66241	-0.575359	17.4072	3.0168e-05	0.00115803	0.0558336	0.959897	-2.68379	-1.8598	-0.91662	0.54743	-4.16498	-4.16498	-4.16498	-0.556019	-0.742995	-4.16498
	Solyc11g022590	up	1.62032	6.53207	15.3474	8.94437e-05	0.00296479	7.20366	6.71073	5.25777	6.95532	7.41884	6.82831	5.96478	5.16748	5.11673	6.39072	7.06749	5.41633
	Solyc11g040040	up	1.62638	2.02177	28.3899	9.91815e-08	7.03687e-06	2.87712	2.78013	2.37989	2.29003	1.7086	2.09523	0.513837	0.29948	0.559808	2.67904	2.03129	0.457708
	Solyc11g050890	up	2.3274	-1.33632	9.82679	0.00171988	0.0326868	-0.947111	-1.13121	-1.9685	-1.18583	-0.779879	-1.34695	-3.11525	-3.19557	-2.48133	-1.34894	-1.10422	-2.93072
	Solyc11g056650	up	1.42336	1.35645	15.5591	7.99645e-05	0.00269299	2.11696	1.89534	1.4075	1.4869	1.42712	1.60212	0.0147099	0.582784	-0.445998	1.8066	1.50538	0.0504985
	Solyc11g062060	down	-1.28441	0.425943	10.3663	0.00128335	0.0263322	-0.307577	-0.32181	-0.144369	0.207383	0.0791806	-0.983986	0.836555	1.20091	1.22491	-0.257919	-0.232474	1.08746
	Solyc11g063540	up	5.2786	-2.23036	15.0529	0.000104541	0.0034115	-4.16498	-4.16498	-2.68379	-1.41477	-2.01354	-1.56964	-4.16498	-4.16498	-4.16498	-3.67125	-1.66598	-4.16498
	Solyc11g065220	up	1.13058	2.74081	23.6709	1.14295e-06	6.47281e-05	2.24575	2.34886	2.58471	3.07159	3.38282	3.47676	1.9975	2.48805	2.04465	2.39311	3.31039	2.17673
	Solyc11g066140	up	5.96021	-1.23305	12.0208	0.000526091	0.0127524	-0.794518	-3.14558	-0.066854	-1.8598	-3.20539	0.0947421	-4.16498	-4.16498	-4.16498	-1.33565	-1.65681	-4.16498
	Solyc11g069020	up	3.31705	-0.726032	23.4288	1.29626e-06	7.27576e-05	-4.16498	-1.81214	-2.28226	0.515312	0.400267	0.0947421	-1.76429	-2.62095	-4.16498	-2.75313	0.336774	-2.85007
	Solyc11g071290	down	-4.24128	-1.04019	20.9781	4.64568e-06	0.000224361	-1.31137	-0.808326	-3.2421	-2.59396	-4.16498	-4.16498	0.0147099	-0.315729	-0.329626	-1.78726	-3.6413	-0.210215
	Solyc11g071610	up	1.00347	1.60422	10.7897	0.00102064	0.0219959	1.17844	1.4048	1.78292	1.82803	2.02332	2.21021	1.27197	1.13557	0.636266	1.45539	2.02052	1.0146
	Solyc11g072470	down	-1.60983	1.88481	17.7819	2.47726e-05	0.000976139	1.61577	0.779176	2.17014	0.515312	1.36947	0.891485	2.68683	2.6317	2.31877	1.52169	0.925423	2.54577
	Solyc11g073130	up	1.27948	1.86391	18.6993	1.53039e-05	0.000638217	2.21011	2.2825	1.67904	2.32232	2.09393	2.16924	0.787537	1.26643	0.67573	2.05722	2.19517	0.909899
	Solyc11g150141	down	-1.30379	1.30035	12.3943	0.00043064	0.0108662	1.20945	0.67955	1.29455	0.569729	0.14937	0.934565	1.35688	1.81881	2.26425	1.06118	0.551221	1.81332
	Solyc12g005020	down	-1.11291	1.7706	12.1798	0.000483089	0.0119043	0.931639	1.70578	1.07273	1.13652	1.66134	0.976396	2.10295	2.47422	2.54902	1.23671	1.25808	2.3754
	Solyc12g005300	up	4.46406	0.798648	38.6989	4.94497e-10	5.18986e-08	2.13608	0.916795	0.489752	0.768937	1.63711	1.09507	-2.51409	-2.21111	-4.16498	1.18088	1.16704	-2.96339
	Solyc12g005630	up	1.00229	8.04829	47.2576	6.22428e-12	8.23104e-10	7.9551	8.1171	7.96491	8.6817	8.42677	8.3062	7.65766	7.34352	7.41416	8.01237	8.47156	7.47178
	Solyc12g006140	up	4.33313	8.00551	260.753	1.17586e-58	3.29999e-55	6.88589	6.58413	6.80602	9.55456	9.21204	9.09502	5.4892	4.71288	4.51553	6.75868	9.28721	4.90587
	Solyc12g006460	up	1.06425	6.98724	14.4161	0.000146545	0.00449748	7.18549	7.29719	6.27365	7.73088	7.34879	7.123	6.71974	6.00164	6.26361	6.91877	7.40089	6.32833
	Solyc12g006470	up	1.11577	8.57316	20.3888	6.31979e-06	0.000292354	8.66487	8.79284	7.91856	9.27667	9.02928	8.83162	8.28051	7.56842	7.88812	8.45876	9.04586	7.91235
	Solyc12g006570	up	1.11166	3.96555	13.6365	0.000221827	0.00633522	4.21511	4.39309	3.56587	4.11791	4.32312	4.53394	3.448	2.43201	3.56487	4.05802	4.32499	3.14829
	Solyc12g007030	up	1.20405	3.97016	37.3685	9.77904e-10	9.49996e-08	4.38055	4.25285	4.18071	4.15398	4.54027	4.02733	3.30729	2.80708	3.02397	4.27137	4.24053	3.04611
	Solyc12g007240	up	3.02827	0.0356901	18.6982	1.53124e-05	0.000638217	0.530588	0.193579	0.383295	-0.377078	-0.154543	1.30662	-3.11525	-2.62095	-1.45768	0.369154	0.258332	-2.39796
	Solyc12g008800	up	1.01403	2.95009	10.5561	0.00115804	0.0242771	3.04835	2.75587	3.20089	2.67222	3.77365	3.29034	1.9975	2.70443	2.10793	3.00171	3.2454	2.26995
	Solyc12g008900	up	2.47961	5.15007	100.374	1.26147e-23	4.97849e-21	5.80626	6.24748	5.45983	5.65957	4.91597	5.3373	2.93208	2.79603	2.8621	5.83786	5.30428	2.8634
	Solyc12g008980	up	2.02848	4.8261	93.1255	4.90822e-22	1.77103e-19	4.62343	4.4885	4.425	5.95363	5.5765	5.30893	3.93245	3.54925	3.28353	4.51231	5.61302	3.58841
	Solyc12g009190	up	4.50365	-1.61129	14.5664	0.000135307	0.00421924	-4.16498	-3.14558	-4.16498	-0.377078	-0.0723553	-2.15563	-4.16498	-4.16498	-3.09034	-3.82518	-0.868356	-3.80677
	Solyc12g009200	up	3.07182	2.02615	101.331	7.78151e-24	3.17009e-21	1.84219	1.80362	1.70137	2.8695	2.69624	3.17831	0.320628	-0.414965	-0.221944	1.78239	2.91468	-0.105427
	Solyc12g009600	up	1.34197	5.90718	38.2629	6.18262e-10	6.32229e-08	5.80877	6.02327	5.47103	6.87954	6.30633	6.1558	5.31854	5.0656	5.02202	5.76769	6.44722	5.13539
	Solyc12g009650	up	2.32169	2.08011	35.6702	2.33715e-09	2.04971e-07	3.17391	3.09247	2.20181	2.38444	1.7086	2.07612	0.0974822	-0.135651	-0.572587	2.82273	2.05639	-0.203585
	Solyc12g009880	down	-1.23169	2.55942	20.4958	5.97633e-06	0.000277993	2.33118	2.74359	1.98232	1.83675	2.11162	1.68014	2.98739	3.38821	2.89835	2.35237	1.87617	3.09131
	Solyc12g010960	up	1.2232	2.24199	16.5404	4.76237e-05	0.00173076	2.42744	2.13744	2.30747	2.15417	2.68447	3.02729	1.10012	1.77416	1.40367	2.29078	2.62198	1.42598
	Solyc12g010980	up	1.71146	3.39131	14.2035	0.000164066	0.00493918	4.78355	4.22216	2.84751	3.62151	2.79807	3.55477	2.03997	1.77416	1.02082	3.95108	3.32478	1.61165
	Solyc12g011010	down	-1.3616	2.93302	20.3026	6.61097e-06	0.0003036	2.95503	2.29938	1.90747	2.24057	2.27752	2.33928	4.05385	3.43157	3.31962	2.38729	2.28579	3.60168
	Solyc12g011033	down	-1.07087	4.20879	40.096	2.41778e-10	2.70214e-08	4.07315	4.20883	3.87175	3.44352	3.80864	3.65477	4.51757	4.86605	4.7285	4.05124	3.63564	4.70404
	Solyc12g011037	down	-1.01206	2.07071	10.4072	0.00125525	0.0258607	2.53246	2.10186	1.94538	1.13652	1.79871	1.09507	2.6867	2.35879	2.02292	2.19324	1.34343	2.35614
	Solyc12g011280	up	2.75779	6.93127	141.282	1.39583e-32	1.06836e-29	6.66483	6.58348	6.42372	8.17007	7.76771	7.66885	5.58514	4.86605	4.8005	6.55734	7.86888	5.08389
	Solyc12g011450	up	1.6354	9.6271	103.758	2.28612e-24	1.03112e-21	9.60252	9.7092	9.45342	10.4249	10.2482	10.0233	8.82485	8.55863	8.40315	9.58838	10.2321	8.59554
	Solyc12g013710	up	3.14479	6.75973	50.3602	1.27963e-12	1.83942e-10	6.78964	6.91657	5.86787	8.15267	7.62576	7.05509	5.25234	4.2652	3.62379	6.52469	7.61117	4.38045
	Solyc12g013900	up	1.06529	5.56243	37.2589	1.03439e-09	1.00102e-07	5.99077	5.65487	6.06162	5.54371	5.97952	5.78703	4.49862	4.75629	4.87212	5.90242	5.77009	4.70901
	Solyc12g014310	up	1.29391	3.13672	24.6434	6.8982e-07	4.13859e-05	3.23725	2.6934	3.57783	3.45802	3.71338	3.56165	1.93134	2.48802	2.40528	3.16949	3.57769	2.27488
	Solyc12g017880	up	1.8744	-0.55609	9.06755	0.00260185	0.0444337	-0.0268016	-0.128825	-0.226287	-0.0148423	-1.4276	-0.346064	-2.51409	-2.21111	-1.72541	-0.127305	-0.59617	-2.1502
	Solyc12g019320	up	1.85542	2.00867	34.2679	4.80248e-09	4.05689e-07	2.57483	2.15847	1.67904	2.63443	2.57397	2.32306	0.836555	0.819481	0.366335	2.13745	2.51048	0.674124
	Solyc12g019550	up	2.70989	4.19767	156.776	5.72995e-36	5.56643e-33	3.98669	3.8334	3.51005	5.32979	5.11949	4.98187	2.57573	2.69256	1.97846	3.77671	5.14372	2.41558
	Solyc12g036170	up	1.48444	4.66037	76.7776	1.91332e-18	5.14114e-16	4.36443	4.64165	4.54892	5.32584	5.4291	5.04875	4.041	3.6743	3.63815	4.51833	5.2679	3.78449
	Solyc12g038510	up	11.1441	3.59487	389.478	1.07529e-86	6.78991e-83	4.41227	4.49184	4.0563	4.14056	3.68412	4.08583	-4.16498	-4.16498	-4.16498	4.32014	3.97017	-4.16498
	Solyc12g040640	down	-1.03273	4.31438	15.8758	6.76391e-05	0.00234352	4.30334	4.58785	3.69388	3.56235	3.39034	4.15577	4.9013	4.53487	4.8507	4.19502	3.70282	4.76229
	Solyc12g040860	up	2.86806	1.95682	57.2632	3.81225e-14	6.37681e-12	2.39606	2.60111	2.58471	2.78001	1.77671	2.16924	-0.490119	-0.898593	-0.121745	2.52729	2.24199	-0.503486
	Solyc12g042600	up	2.08241	0.929968	24.8141	6.31344e-07	3.83487e-05	1.27991	1.08198	1.32363	0.902144	1.48255	1.54767	-0.073102	-0.636608	-1.72541	1.2285	1.31079	-0.811708
	Solyc12g043040	up	1.22985	2.52013	11.6553	0.000640199	0.0149862	2.89966	3.12123	3.06974	2.04316	2.09393	3.33925	1.32288	1.29811	1.59251	3.03021	2.49211	1.4045
	Solyc12g044280	up	3.12964	5.88612	456.743	2.45817e-101	2.06962e-97	5.16238	5.15889	5.23123	7.10952	6.97958	6.84181	3.98231	3.85022	3.72222	5.18417	6.97697	3.85159
	Solyc12g044950	up	8.65704	4.80588	94.6363	2.28784e-22	8.62483e-20	5.6353	5.75557	5.47306	3.17174	4.2963	6.20721	-2.51409	-3.19557	-3.09034	5.62131	4.55842	-2.93333
	Solyc12g049250	up	3.50296	0.52594	16.6291	4.54491e-05	0.00166611	1.21651	1.54523	1.20362	0.137044	-1.90826	1.57515	-2.51409	-2.62095	-2.48133	1.32179	-0.0653536	-2.53879
	Solyc12g049255	up	5.88428	-1.07218	10.4718	0.0012121	0.0250533	0.345875	-3.14558	-0.313138	-4.16498	-1.4276	-0.0657994	-4.16498	-4.16498	-4.16498	-1.03762	-1.88613	-4.16498
	Solyc12g055970	up	1.04508	3.68831	25.2515	5.03196e-07	3.15378e-05	4.00274	4.04335	3.74851	4.11791	3.79775	3.95276	3.28981	2.73946	2.65169	3.93153	3.95614	2.89366
	Solyc12g056160	up	1.64864	0.0573357	11.2914	0.000778688	0.0177031	0.0558336	0.57253	0.636016	-0.377078	0.563405	0.306335	-1.07905	-1.41047	-1.45768	0.42146	0.164221	-1.31573
	Solyc12g056390	up	4.89964	-0.720843	18.5569	1.6491e-05	0.000680604	-0.947111	-1.54784	0.326968	-1.1833	0.613928	-0.983986	-4.16498	-3.19557	-4.16498	-0.722659	-0.517787	-3.84184
[truncated: 17 more rows]

## Sheet: Table S5
	Table S5. Differentially expressed genes in SlGLK2ox fruit at 15 days after anthesis.
[truncated: 2,232 more rows]

[truncated: 2 more sheets: Table S6, Table S7]
